# Supplementary material for: Actuation of bilayer hydrogels via a cross-stimuli chemical reaction network
Source: Royal Society of Chemistry journal article supplement (doi:10.1039/d5cc02922h), 2025-01-01
Supplement: d5cc02922h2.xlsx [file d5cc02922h2.xlsx]

## Sheet: Fig2a
	0.25 M					0.5 M	1.0 M	1.5 M	2.0M
3997.62	0.94974	3997.62	3997.62	3997.62	3997.62	1.97415	2.93717	3.97087	4.94202
3996.2	0.94974	3996.2	3996.2	3996.2	3996.2	1.97415	2.93717	3.97087	4.94202
3994.77	0.94974	3994.77	3994.77	3994.77	3994.77	1.97415	2.93717	3.97087	4.94202
3993.34	0.94974	3993.34	3993.34	3993.34	3993.34	1.97415	2.93717	3.97087	4.94202
3991.91	0.94974	3991.91	3991.91	3991.91	3991.91	1.97415	2.93717	3.97087	4.94202
3990.48	0.94974	3990.48	3990.48	3990.48	3990.48	1.97415	2.93717	3.97087	4.94202
3989.06	0.94974	3989.06	3989.06	3989.06	3989.06	1.97415	2.93717	3.97087	4.94202
3987.63	0.94974	3987.63	3987.63	3987.63	3987.63	1.97415	2.93717	3.97087	4.94202
3986.2	0.94974	3986.2	3986.2	3986.2	3986.2	1.97415	2.93717	3.97087	4.94202
3984.77	0.94974	3984.77	3984.77	3984.77	3984.77	1.97415	2.93717	3.97087	4.94202
3983.35	0.94974	3983.35	3983.35	3983.35	3983.35	1.97415	2.93717	3.97087	4.94202
3981.92	0.95039	3981.92	3981.92	3981.92	3981.92	1.9747	2.93818	3.9712	4.94292
3980.49	0.95107	3980.49	3980.49	3980.49	3980.49	1.97525	2.93919	3.97159	4.94381
3979.06	0.9518	3979.06	3979.06	3979.06	3979.06	1.97581	2.9402	3.97206	4.9447
3977.63	0.95256	3977.63	3977.63	3977.63	3977.63	1.97638	2.9412	3.97261	4.9456
3976.21	0.95331	3976.21	3976.21	3976.21	3976.21	1.97696	2.9422	3.97319	4.9465
3974.78	0.95404	3974.78	3974.78	3974.78	3974.78	1.97752	2.94316	3.97375	4.9474
3973.35	0.95473	3973.35	3973.35	3973.35	3973.35	1.97808	2.94409	3.97425	4.9483
3971.92	0.9554	3971.92	3971.92	3971.92	3971.92	1.97864	2.94501	3.97468	4.9492
3970.5	0.95604	3970.5	3970.5	3970.5	3970.5	1.97918	2.9459	3.97504	4.9501
3969.07	0.95665	3969.07	3969.07	3969.07	3969.07	1.97969	2.94677	3.9753	4.95098
3967.64	0.95726	3967.64	3967.64	3967.64	3967.64	1.98019	2.9476	3.97556	4.95185
3966.21	0.95787	3966.21	3966.21	3966.21	3966.21	1.9807	2.94843	3.97584	4.95272
3964.79	0.9585	3964.79	3964.79	3964.79	3964.79	1.98121	2.94927	3.97617	4.95356
3963.36	0.95911	3963.36	3963.36	3963.36	3963.36	1.98169	2.95011	3.97644	4.95436
3961.93	0.95969	3961.93	3961.93	3961.93	3961.93	1.98208	2.95092	3.97658	4.95508
3960.5	0.96022	3960.5	3960.5	3960.5	3960.5	1.98239	2.95169	3.97663	4.95575
3959.07	0.96076	3959.07	3959.07	3959.07	3959.07	1.98267	2.95244	3.97666	4.95639
3957.65	0.96132	3957.65	3957.65	3957.65	3957.65	1.98294	2.95319	3.97673	4.95703
3956.22	0.96189	3956.22	3956.22	3956.22	3956.22	1.98319	2.95393	3.97678	4.95767
3954.79	0.96243	3954.79	3954.79	3954.79	3954.79	1.98344	2.95467	3.97682	4.95829
3953.36	0.963	3953.36	3953.36	3953.36	3953.36	1.98372	2.95542	3.97689	4.95893
3951.94	0.9636	3951.94	3951.94	3951.94	3951.94	1.98407	2.95619	3.97706	4.95964
3950.51	0.96425	3950.51	3950.51	3950.51	3950.51	1.9845	2.957	3.97732	4.9604
3949.08	0.9649	3949.08	3949.08	3949.08	3949.08	1.98497	2.95782	3.97761	4.96122
3947.65	0.96552	3947.65	3947.65	3947.65	3947.65	1.98538	2.95861	3.97785	4.96205
3946.23	0.96611	3946.23	3946.23	3946.23	3946.23	1.98569	2.95935	3.978	4.96286
3944.8	0.96667	3944.8	3944.8	3944.8	3944.8	1.98591	2.96004	3.97808	4.96364
3943.37	0.96725	3943.37	3943.37	3943.37	3943.37	1.98611	2.96072	3.97819	4.9644
3941.94	0.96787	3941.94	3941.94	3941.94	3941.94	1.98639	2.96145	3.97842	4.96515
3940.51	0.96853	3940.51	3940.51	3940.51	3940.51	1.98675	2.96225	3.97875	4.96591
3939.09	0.96921	3939.09	3939.09	3939.09	3939.09	1.98717	2.96309	3.97914	4.96666
3937.66	0.96987	3937.66	3937.66	3937.66	3937.66	1.9876	2.96395	3.9795	4.96739
3936.23	0.97049	3936.23	3936.23	3936.23	3936.23	1.98802	2.9648	3.97979	4.96807
3934.8	0.97105	3934.8	3934.8	3934.8	3934.8	1.98839	2.96561	3.98002	4.96872
3933.38	0.97156	3933.38	3933.38	3933.38	3933.38	1.98869	2.96637	3.98016	4.96934
3931.95	0.97201	3931.95	3931.95	3931.95	3931.95	1.98887	2.96706	3.98022	4.96992
3930.52	0.97243	3930.52	3930.52	3930.52	3930.52	1.98892	2.96771	3.98021	4.97048
3929.09	0.97282	3929.09	3929.09	3929.09	3929.09	1.9889	2.96833	3.98015	4.97102
3927.66	0.97321	3927.66	3927.66	3927.66	3927.66	1.98891	2.96895	3.98008	4.97157
3926.24	0.97363	3926.24	3926.24	3926.24	3926.24	1.98906	2.96963	3.98014	4.97218
3924.81	0.97412	3924.81	3924.81	3924.81	3924.81	1.98941	2.97037	3.9804	4.9729
3923.38	0.97467	3923.38	3923.38	3923.38	3923.38	1.98995	2.97118	3.98089	4.97373
3921.95	0.9753	3921.95	3921.95	3921.95	3921.95	1.99061	2.97202	3.98158	4.97462
3920.53	0.97593	3920.53	3920.53	3920.53	3920.53	1.99124	2.97286	3.98232	4.97553
3919.1	0.97651	3919.1	3919.1	3919.1	3919.1	1.99168	2.97363	3.98293	4.97636
3917.67	0.97698	3917.67	3917.67	3917.67	3917.67	1.99188	2.97433	3.98326	4.97708
3916.24	0.97739	3916.24	3916.24	3916.24	3916.24	1.9919	2.97498	3.9834	4.97767
3914.82	0.97783	3914.82	3914.82	3914.82	3914.82	1.99184	2.97563	3.98349	4.97819
3913.39	0.97829	3913.39	3913.39	3913.39	3913.39	1.99178	2.97631	3.98358	4.97868
3911.96	0.97878	3911.96	3911.96	3911.96	3911.96	1.99176	2.977	3.98368	4.97915
3910.53	0.97928	3910.53	3910.53	3910.53	3910.53	1.99185	2.97773	3.98385	4.97963
3909.1	0.97984	3909.1	3909.1	3909.1	3909.1	1.99208	2.97848	3.98419	4.98018
3907.68	0.98047	3907.68	3907.68	3907.68	3907.68	1.99237	2.97926	3.98469	4.98081
3906.25	0.98109	3906.25	3906.25	3906.25	3906.25	1.99257	2.98001	3.98517	4.98146
3904.82	0.98164	3904.82	3904.82	3904.82	3904.82	1.99265	2.98073	3.98551	4.98211
3903.39	0.98216	3903.39	3903.39	3903.39	3903.39	1.99269	2.98142	3.98576	4.98275
3901.97	0.98268	3901.97	3901.97	3901.97	3901.97	1.99277	2.98213	3.98606	4.98342
3900.54	0.98325	3900.54	3900.54	3900.54	3900.54	1.99291	2.98285	3.98648	4.98414
3899.11	0.98388	3899.11	3899.11	3899.11	3899.11	1.99311	2.98359	3.98699	4.98488
3897.68	0.98456	3897.68	3897.68	3897.68	3897.68	1.99338	2.98435	3.9876	4.98562
3896.25	0.98528	3896.25	3896.25	3896.25	3896.25	1.99371	2.9851	3.98833	4.98635
3894.83	0.986	3894.83	3894.83	3894.83	3894.83	1.99406	2.98584	3.98907	4.98703
3893.4	0.98663	3893.4	3893.4	3893.4	3893.4	1.99434	2.98651	3.98971	4.98762
3891.97	0.98716	3891.97	3891.97	3891.97	3891.97	1.99452	2.98713	3.99016	4.98813
3890.54	0.98763	3890.54	3890.54	3890.54	3890.54	1.9946	2.98767	3.99046	4.98856
3889.12	0.98809	3889.12	3889.12	3889.12	3889.12	1.99459	2.98815	3.99071	4.98894
3887.69	0.98859	3887.69	3887.69	3887.69	3887.69	1.99452	2.98856	3.99096	4.98929
3886.26	0.98912	3886.26	3886.26	3886.26	3886.26	1.99441	2.98891	3.99123	4.98963
3884.83	0.98962	3884.83	3884.83	3884.83	3884.83	1.99428	2.98925	3.99148	4.98998
3883.41	0.9901	3883.41	3883.41	3883.41	3883.41	1.99424	2.9896	3.99175	4.99036
3881.98	0.99059	3881.98	3881.98	3881.98	3881.98	1.99437	2.99001	3.99215	4.99083
3880.55	0.9911	3880.55	3880.55	3880.55	3880.55	1.9946	2.99046	3.99268	4.99138
3879.12	0.99156	3879.12	3879.12	3879.12	3879.12	1.99481	2.99092	3.99315	4.99199
3877.69	0.99192	3877.69	3877.69	3877.69	3877.69	1.99494	2.99137	3.99344	4.99257
3876.27	0.99222	3876.27	3876.27	3876.27	3876.27	1.99508	2.99185	3.99363	4.99315
3874.84	0.99259	3874.84	3874.84	3874.84	3874.84	1.99534	2.9924	3.99394	4.99374
3873.41	0.99311	3873.41	3873.41	3873.41	3873.41	1.99573	2.99301	3.99459	4.99437
3871.98	0.99383	3871.98	3871.98	3871.98	3871.98	1.99609	2.99363	3.99552	4.99501
3870.56	0.99465	3870.56	3870.56	3870.56	3870.56	1.99625	2.99417	3.99656	4.99558
3869.13	0.99536	3869.13	3869.13	3869.13	3869.13	1.99598	2.99453	3.99728	4.99598
3867.7	0.99572	3867.7	3867.7	3867.7	3867.7	1.99526	2.99473	3.99724	4.99618
3866.27	0.99561	3866.27	3866.27	3866.27	3866.27	1.99441	2.99491	3.99646	4.99621
3864.84	0.99517	3864.84	3864.84	3864.84	3864.84	1.99391	2.99525	3.9954	4.99624
3863.42	0.99469	3863.42	3863.42	3863.42	3863.42	1.99391	2.99581	3.9946	4.99641
3861.99	0.99432	3861.99	3861.99	3861.99	3861.99	1.99429	2.99649	3.99422	4.99675
3860.56	0.9941	3860.56	3860.56	3860.56	3860.56	1.99477	2.99715	3.99417	4.99718
3859.13	0.99395	3859.13	3859.13	3859.13	3859.13	1.99511	2.99769	3.99422	4.99761
3857.71	0.99383	3857.71	3857.71	3857.71	3857.71	1.99522	2.99808	3.99424	4.99799
3856.28	0.99373	3856.28	3856.28	3856.28	3856.28	1.99514	2.99835	3.99419	4.9983
3854.85	0.99366	3854.85	3854.85	3854.85	3854.85	1.99498	2.99852	3.99409	4.99856
3853.42	0.99367	3853.42	3853.42	3853.42	3853.42	1.9948	2.99865	3.99401	4.9988
3852	0.99376	3852	3852	3852	3852	1.99463	2.99873	3.99397	4.99903
3850.57	0.99393	3850.57	3850.57	3850.57	3850.57	1.99451	2.99883	3.99399	4.99922
3849.14	0.99416	3849.14	3849.14	3849.14	3849.14	1.99453	2.999	3.99414	4.99939
3847.71	0.9945	3847.71	3847.71	3847.71	3847.71	1.99474	2.99925	3.99459	4.99953
3846.28	0.99499	3846.28	3846.28	3846.28	3846.28	1.9951	2.99955	3.99541	4.99967
3844.86	0.99565	3844.86	3844.86	3844.86	3844.86	1.99552	2.99983	3.99658	4.99983
3843.43	0.99635	3843.43	3843.43	3843.43	3843.43	1.99579	3	3.99779	4.99996
3842	0.99689	3842	3842	3842	3842	1.99576	2.99999	3.99867	5
3840.57	0.9971	3840.57	3840.57	3840.57	3840.57	1.99547	2.99982	3.99895	4.99992
3839.15	0.99696	3839.15	3839.15	3839.15	3839.15	1.99522	2.99963	3.99875	4.99978
3837.72	0.99661	3837.72	3837.72	3837.72	3837.72	1.99533	2.99953	3.99851	4.99969
3836.29	0.99625	3836.29	3836.29	3836.29	3836.29	1.99578	2.99952	3.99849	4.99971
3834.86	0.99596	3834.86	3834.86	3834.86	3834.86	1.99632	2.99951	3.99864	4.9998
3833.43	0.99576	3833.43	3833.43	3833.43	3833.43	1.99677	2.99944	3.99884	4.9999
3832.01	0.99565	3832.01	3832.01	3832.01	3832.01	1.99704	2.99926	3.99903	4.99995
3830.58	0.99558	3830.58	3830.58	3830.58	3830.58	1.99711	2.999	3.99913	4.99992
3829.15	0.99551	3829.15	3829.15	3829.15	3829.15	1.99705	2.99871	3.99912	4.99982
3827.72	0.99545	3827.72	3827.72	3827.72	3827.72	1.99705	2.99844	3.99904	4.99969
3826.3	0.99542	3826.3	3826.3	3826.3	3826.3	1.99716	2.99822	3.99899	4.99955
3824.87	0.99544	3824.87	3824.87	3824.87	3824.87	1.99736	2.99803	3.99899	4.99941
3823.44	0.99545	3823.44	3823.44	3823.44	3823.44	1.99755	2.99784	3.99895	4.99925
3822.01	0.9954	3822.01	3822.01	3822.01	3822.01	1.99766	2.99763	3.99879	4.99902
3820.59	0.99523	3820.59	3820.59	3820.59	3820.59	1.99773	2.99741	3.9985	4.99873
3819.16	0.99501	3819.16	3819.16	3819.16	3819.16	1.9978	2.9972	3.99816	4.99843
3817.73	0.99476	3817.73	3817.73	3817.73	3817.73	1.99787	2.99702	3.99783	4.99817
3816.3	0.9945	3816.3	3816.3	3816.3	3816.3	1.99789	2.99685	3.9975	4.99797
3814.87	0.99423	3814.87	3814.87	3814.87	3814.87	1.9979	2.99672	3.99718	4.99784
3813.45	0.99395	3813.45	3813.45	3813.45	3813.45	1.99796	2.99663	3.99691	4.99776
3812.02	0.99366	3812.02	3812.02	3812.02	3812.02	1.99809	2.99657	3.99671	4.99775
3810.59	0.99336	3810.59	3810.59	3810.59	3810.59	1.99819	2.99649	3.9965	4.99774
3809.16	0.993	3809.16	3809.16	3809.16	3809.16	1.99816	2.99637	3.99618	4.99769
3807.74	0.9926	3807.74	3807.74	3807.74	3807.74	1.99805	2.99623	3.99572	4.99759
3806.31	0.99218	3806.31	3806.31	3806.31	3806.31	1.99794	2.99612	3.99521	4.99745
3804.88	0.99177	3804.88	3804.88	3804.88	3804.88	1.99787	2.99603	3.99476	4.99729
3803.45	0.99138	3803.45	3803.45	3803.45	3803.45	1.9978	2.99594	3.99432	4.99709
3802.03	0.99096	3802.03	3802.03	3802.03	3802.03	1.99769	2.99582	3.99384	4.99685
3800.6	0.99053	3800.6	3800.6	3800.6	3800.6	1.99757	2.99569	3.99335	4.99659
3799.17	0.99011	3799.17	3799.17	3799.17	3799.17	1.99751	2.99555	3.99291	4.99633
3797.74	0.9897	3797.74	3797.74	3797.74	3797.74	1.99742	2.99537	3.99252	4.99607
3796.31	0.98929	3796.31	3796.31	3796.31	3796.31	1.99719	2.99507	3.99208	4.9958
3794.89	0.98882	3794.89	3794.89	3794.89	3794.89	1.99674	2.99465	3.99145	4.99549
3793.46	0.98826	3793.46	3793.46	3793.46	3793.46	1.99613	2.99417	3.99056	4.99514
3792.03	0.98766	3792.03	3792.03	3792.03	3792.03	1.99548	2.99371	3.98954	4.99479
3790.6	0.9871	3790.6	3790.6	3790.6	3790.6	1.99491	2.99334	3.98855	4.99449
3789.18	0.98664	3789.18	3789.18	3789.18	3789.18	1.99444	2.99306	3.98768	4.99426
3787.75	0.98626	3787.75	3787.75	3787.75	3787.75	1.99404	2.99287	3.98693	4.99409
3786.32	0.98594	3786.32	3786.32	3786.32	3786.32	1.99376	2.99277	3.9863	4.99398
3784.89	0.98566	3784.89	3784.89	3784.89	3784.89	1.99363	2.99274	3.98581	4.99391
3783.46	0.98543	3783.46	3783.46	3783.46	3783.46	1.99358	2.99274	3.98543	4.99382
3782.04	0.98526	3782.04	3782.04	3782.04	3782.04	1.99359	2.99277	3.98518	4.99372
3780.61	0.98519	3780.61	3780.61	3780.61	3780.61	1.99369	2.99281	3.9851	4.99358
3779.18	0.98524	3779.18	3779.18	3779.18	3779.18	1.99389	2.99285	3.98523	4.99346
3777.75	0.98543	3777.75	3777.75	3777.75	3777.75	1.99415	2.99287	3.98552	4.99334
3776.33	0.98569	3776.33	3776.33	3776.33	3776.33	1.9944	2.99283	3.98591	4.99322
3774.9	0.98602	3774.9	3774.9	3774.9	3774.9	1.99457	2.99272	3.98631	4.9931
3773.47	0.98636	3773.47	3773.47	3773.47	3773.47	1.99469	2.99258	3.98673	4.99297
3772.04	0.98672	3772.04	3772.04	3772.04	3772.04	1.99479	2.99241	3.98719	4.99281
3770.62	0.98714	3770.62	3770.62	3770.62	3770.62	1.99497	2.99225	3.98786	4.99268
3769.19	0.98768	3769.19	3769.19	3769.19	3769.19	1.99522	2.9921	3.98876	4.99261
3767.76	0.98833	3767.76	3767.76	3767.76	3767.76	1.99541	2.99192	3.98976	4.99259
3766.33	0.98898	3766.33	3766.33	3766.33	3766.33	1.99541	2.99168	3.9906	4.99256
3764.9	0.98957	3764.9	3764.9	3764.9	3764.9	1.99527	2.99144	3.99112	4.99251
3763.48	0.9901	3763.48	3763.48	3763.48	3763.48	1.99525	2.99134	3.99147	4.99249
3762.05	0.99064	3762.05	3762.05	3762.05	3762.05	1.99552	2.9914	3.99196	4.99257
3760.62	0.9912	3760.62	3760.62	3760.62	3760.62	1.99598	2.99161	3.99262	4.99276
3759.19	0.99173	3759.19	3759.19	3759.19	3759.19	1.99637	2.99186	3.99324	4.99298
3757.77	0.99217	3757.77	3757.77	3757.77	3757.77	1.99663	2.99209	3.99364	4.99319
3756.34	0.99254	3756.34	3756.34	3756.34	3756.34	1.99695	2.99238	3.9939	4.99339
3754.91	0.99293	3754.91	3754.91	3754.91	3754.91	1.99754	2.99279	3.99426	4.99367
3753.48	0.99341	3753.48	3753.48	3753.48	3753.48	1.99838	2.99329	3.99489	4.99402
3752.05	0.99398	3752.05	3752.05	3752.05	3752.05	1.9992	2.99379	3.99569	4.99441
3750.63	0.9946	3750.63	3750.63	3750.63	3750.63	1.99972	2.99415	3.99644	4.99477
3749.2	0.9952	3749.2	3749.2	3749.2	3749.2	1.9998	2.9943	3.9969	4.995
3747.77	0.99575	3747.77	3747.77	3747.77	3747.77	1.99948	2.99426	3.99706	4.99508
3746.34	0.99626	3746.34	3746.34	3746.34	3746.34	1.99896	2.99412	3.99703	4.99507
3744.92	0.99678	3744.92	3744.92	3744.92	3744.92	1.99853	2.99403	3.99708	4.99504
3743.49	0.99737	3743.49	3743.49	3743.49	3743.49	1.99833	2.994	3.99739	4.99505
3742.06	0.99806	3742.06	3742.06	3742.06	3742.06	1.99832	2.994	3.99801	4.99515
3740.63	0.99876	3740.63	3740.63	3740.63	3740.63	1.99824	2.99392	3.99867	4.99524
3739.21	0.99935	3739.21	3739.21	3739.21	3739.21	1.99794	2.99367	3.99904	4.99526
3737.78	0.99973	3737.78	3737.78	3737.78	3737.78	1.99745	2.99332	3.99899	4.99515
3736.35	0.99993	3736.35	3736.35	3736.35	3736.35	1.99701	2.99297	3.99862	4.99498
3734.92	1	3734.92	3734.92	3734.92	3734.92	1.9968	2.99272	3.99817	4.99481
3733.49	1	3733.49	3733.49	3733.49	3733.49	1.99684	2.99256	3.9978	4.99469
3732.07	0.99993	3732.07	3732.07	3732.07	3732.07	1.997	2.99244	3.99747	4.99462
3730.64	0.99978	3730.64	3730.64	3730.64	3730.64	1.99721	2.99231	3.99714	4.99458
3729.21	0.99957	3729.21	3729.21	3729.21	3729.21	1.99756	2.99219	3.99685	4.99458
3727.78	0.99931	3727.78	3727.78	3727.78	3727.78	1.99801	2.99209	3.99668	4.99463
3726.36	0.999	3726.36	3726.36	3726.36	3726.36	1.99838	2.99196	3.99656	4.9947
3724.93	0.99865	3724.93	3724.93	3724.93	3724.93	1.99846	2.99178	3.99625	4.99474
3723.5	0.99824	3723.5	3723.5	3723.5	3723.5	1.99822	2.99156	3.99569	4.99469
3722.07	0.99782	3722.07	3722.07	3722.07	3722.07	1.99775	2.99127	3.99496	4.99455
3720.64	0.99745	3720.64	3720.64	3720.64	3720.64	1.99724	2.99101	3.99423	4.99433
3719.22	0.99721	3719.22	3719.22	3719.22	3719.22	1.99691	2.99085	3.99376	4.99414
3717.79	0.99713	3717.79	3717.79	3717.79	3717.79	1.99688	2.99086	3.99371	4.99404
3716.36	0.99719	3716.36	3716.36	3716.36	3716.36	1.9971	2.99103	3.99403	4.99402
3714.93	0.99733	3714.93	3714.93	3714.93	3714.93	1.99747	2.99129	3.99451	4.99404
3713.51	0.99751	3713.51	3713.51	3713.51	3713.51	1.99785	2.99153	3.99505	4.99404
3712.08	0.99772	3712.08	3712.08	3712.08	3712.08	1.99818	2.99168	3.99559	4.99397
3710.65	0.99798	3710.65	3710.65	3710.65	3710.65	1.99847	2.99178	3.99612	4.99385
3709.22	0.99828	3709.22	3709.22	3709.22	3709.22	1.99877	2.99184	3.99672	4.99372
3707.8	0.99861	3707.8	3707.8	3707.8	3707.8	1.99912	2.9919	3.99741	4.99363
3706.37	0.99895	3706.37	3706.37	3706.37	3706.37	1.99952	2.99195	3.99818	4.99361
3704.94	0.99925	3704.94	3704.94	3704.94	3704.94	1.99986	2.99199	3.9989	4.99362
3703.51	0.99943	3703.51	3703.51	3703.51	3703.51	2	2.99201	3.99938	4.9936
3702.08	0.99945	3702.08	3702.08	3702.08	3702.08	1.99984	2.99199	3.99947	4.99343
3700.66	0.99933	3700.66	3700.66	3700.66	3700.66	1.99937	2.9919	3.99914	4.99304
3699.23	0.99908	3699.23	3699.23	3699.23	3699.23	1.99866	2.99167	3.99839	4.99236
3697.8	0.99873	3697.8	3697.8	3697.8	3697.8	1.99778	2.99124	3.99727	4.99137
3696.37	0.99833	3696.37	3696.37	3696.37	3696.37	1.99688	2.99052	3.99594	4.99009
3694.95	0.998	3694.95	3694.95	3694.95	3694.95	1.996	2.98949	3.99459	4.98853
3693.52	0.99775	3693.52	3693.52	3693.52	3693.52	1.99509	2.98807	3.99327	4.98667
3692.09	0.99758	3692.09	3692.09	3692.09	3692.09	1.99406	2.9863	3.99185	4.98455
3690.66	0.99741	3690.66	3690.66	3690.66	3690.66	1.9928	2.9842	3.99016	4.98221
3689.23	0.99714	3689.23	3689.23	3689.23	3689.23	1.99134	2.98191	3.98809	4.97969
3687.81	0.99679	3687.81	3687.81	3687.81	3687.81	1.98994	2.97962	3.98585	4.97716
3686.38	0.99644	3686.38	3686.38	3686.38	3686.38	1.98877	2.9775	3.98381	4.97478
3684.95	0.99611	3684.95	3684.95	3684.95	3684.95	1.98791	2.97562	3.98218	4.9727
3683.52	0.9958	3683.52	3683.52	3683.52	3683.52	1.98731	2.97406	3.98104	4.97098
3682.1	0.99551	3682.1	3682.1	3682.1	3682.1	1.98703	2.97291	3.98045	4.96973
3680.67	0.99528	3680.67	3680.67	3680.67	3680.67	1.98712	2.97221	3.98047	4.96899
3679.24	0.99513	3679.24	3679.24	3679.24	3679.24	1.98757	2.972	3.98111	4.96878
3677.81	0.99505	3677.81	3677.81	3677.81	3677.81	1.98827	2.97222	3.98218	4.96907
3676.39	0.99496	3676.39	3676.39	3676.39	3676.39	1.98912	2.97284	3.98349	4.96973
3674.96	0.99482	3674.96	3674.96	3674.96	3674.96	1.99001	2.97381	3.98491	4.97061
3673.53	0.99464	3673.53	3673.53	3673.53	3673.53	1.9909	2.97505	3.98646	4.97155
3672.1	0.99444	3672.1	3672.1	3672.1	3672.1	1.99167	2.97637	3.98812	4.97243
3670.67	0.99422	3670.67	3670.67	3670.67	3670.67	1.99223	2.97762	3.98977	4.97317
3669.25	0.99403	3669.25	3669.25	3669.25	3669.25	1.9926	2.97869	3.99139	4.97373
3667.82	0.99396	3667.82	3667.82	3667.82	3667.82	1.99284	2.9795	3.99296	4.97413
3666.39	0.99398	3666.39	3666.39	3666.39	3666.39	1.99292	2.98005	3.99439	4.97437
3664.96	0.99394	3664.96	3664.96	3664.96	3664.96	1.99266	2.98029	3.99537	4.97439
3663.54	0.99369	3663.54	3663.54	3663.54	3663.54	1.99189	2.98023	3.99553	4.97407
3662.11	0.99317	3662.11	3662.11	3662.11	3662.11	1.99073	2.97997	3.99492	4.97342
3660.68	0.99254	3660.68	3660.68	3660.68	3660.68	1.98954	2.97966	3.99393	4.97254
3659.25	0.99195	3659.25	3659.25	3659.25	3659.25	1.98859	2.97936	3.993	4.97158
3657.83	0.99146	3657.83	3657.83	3657.83	3657.83	1.98789	2.97903	3.99231	4.97061
3656.4	0.99105	3656.4	3656.4	3656.4	3656.4	1.98729	2.97861	3.99179	4.96964
3654.97	0.99072	3654.97	3654.97	3654.97	3654.97	1.98681	2.97808	3.99133	4.96864
3653.54	0.99048	3653.54	3653.54	3653.54	3653.54	1.98649	2.97746	3.99103	4.96764
3652.11	0.99039	3652.11	3652.11	3652.11	3652.11	1.98636	2.97672	3.99094	4.96663
3650.69	0.99043	3650.69	3650.69	3650.69	3650.69	1.98636	2.9758	3.99102	4.96561
3649.26	0.99059	3649.26	3649.26	3649.26	3649.26	1.9864	2.97468	3.99119	4.9645
3647.83	0.99084	3647.83	3647.83	3647.83	3647.83	1.98639	2.97332	3.99139	4.96326
3646.4	0.99116	3646.4	3646.4	3646.4	3646.4	1.98619	2.97173	3.99153	4.96182
3644.98	0.99148	3644.98	3644.98	3644.98	3644.98	1.98561	2.96992	3.99141	4.96015
3643.55	0.99168	3643.55	3643.55	3643.55	3643.55	1.98452	2.96789	3.99079	4.95821
3642.12	0.99171	3642.12	3642.12	3642.12	3642.12	1.98306	2.96568	3.98959	4.95603
3640.69	0.99163	3640.69	3640.69	3640.69	3640.69	1.98151	2.96338	3.98806	4.95372
3639.26	0.99155	3639.26	3639.26	3639.26	3639.26	1.98003	2.96101	3.98646	4.95136
3637.84	0.99147	3637.84	3637.84	3637.84	3637.84	1.9785	2.95854	3.98479	4.94895
3636.41	0.99133	3636.41	3636.41	3636.41	3636.41	1.97674	2.95594	3.98285	4.94642
3634.98	0.99108	3634.98	3634.98	3634.98	3634.98	1.97469	2.95323	3.98056	4.94372
3633.55	0.99075	3633.55	3633.55	3633.55	3633.55	1.97252	2.95047	3.97802	4.94087
3632.13	0.99041	3632.13	3632.13	3632.13	3632.13	1.97042	2.94767	3.97541	4.93792
3630.7	0.99012	3630.7	3630.7	3630.7	3630.7	1.96846	2.94484	3.97289	4.93493
3629.27	0.9899	3629.27	3629.27	3629.27	3629.27	1.96656	2.94193	3.97048	4.9319
3627.84	0.98974	3627.84	3627.84	3627.84	3627.84	1.96459	2.93894	3.96814	4.9288
3626.42	0.98962	3626.42	3626.42	3626.42	3626.42	1.96248	2.93585	3.96579	4.92563
3624.99	0.98953	3624.99	3624.99	3624.99	3624.99	1.96024	2.93268	3.96344	4.92239
3623.56	0.98948	3623.56	3623.56	3623.56	3623.56	1.95791	2.92943	3.96114	4.91909
3622.13	0.98948	3622.13	3622.13	3622.13	3622.13	1.95552	2.92609	3.95883	4.91574
3620.7	0.9895	3620.7	3620.7	3620.7	3620.7	1.95309	2.92266	3.95652	4.91233
3619.28	0.98951	3619.28	3619.28	3619.28	3619.28	1.95065	2.91912	3.95412	4.90885
3617.85	0.98945	3617.85	3617.85	3617.85	3617.85	1.94814	2.91549	3.95156	4.90532
3616.42	0.98924	3616.42	3616.42	3616.42	3616.42	1.94545	2.91178	3.94868	4.90173
3614.99	0.98882	3614.99	3614.99	3614.99	3614.99	1.94262	2.908	3.94544	4.89804
3613.57	0.98823	3613.57	3613.57	3613.57	3613.57	1.93978	2.90419	3.94199	4.89429
3612.14	0.98763	3612.14	3612.14	3612.14	3612.14	1.93708	2.9004	3.93862	4.89054
3610.71	0.9871	3610.71	3610.71	3610.71	3610.71	1.93448	2.89659	3.93546	4.88683
3609.28	0.98661	3609.28	3609.28	3609.28	3609.28	1.93181	2.89273	3.93237	4.88314
3607.85	0.98605	3607.85	3607.85	3607.85	3607.85	1.92896	2.8888	3.92911	4.87939
3606.43	0.98534	3606.43	3606.43	3606.43	3606.43	1.92595	2.88478	3.92557	4.87554
3605	0.9845	3605	3605	3605	3605	1.92288	2.88073	3.92179	4.87157
3603.57	0.98362	3603.57	3603.57	3603.57	3603.57	1.91985	2.87668	3.91793	4.86753
3602.14	0.98274	3602.14	3602.14	3602.14	3602.14	1.91682	2.8726	3.91402	4.86342
3600.72	0.98184	3600.72	3600.72	3600.72	3600.72	1.91365	2.86845	3.90996	4.85919
3599.29	0.98085	3599.29	3599.29	3599.29	3599.29	1.91022	2.86418	3.90563	4.8548
3597.86	0.97979	3597.86	3597.86	3597.86	3597.86	1.90652	2.85981	3.90103	4.85024
3596.43	0.97868	3596.43	3596.43	3596.43	3596.43	1.90264	2.85537	3.89627	4.84557
3595.01	0.97757	3595.01	3595.01	3595.01	3595.01	1.89868	2.85088	3.89144	4.84087
3593.58	0.97646	3593.58	3593.58	3593.58	3593.58	1.89473	2.84635	3.88662	4.83619
3592.15	0.97537	3592.15	3592.15	3592.15	3592.15	1.89093	2.84179	3.88185	4.83155
3590.72	0.97431	3590.72	3590.72	3590.72	3590.72	1.88731	2.8372	3.87722	4.827
3589.29	0.9733	3589.29	3589.29	3589.29	3589.29	1.8839	2.83263	3.87277	4.82256
3587.87	0.97234	3587.87	3587.87	3587.87	3587.87	1.88069	2.82809	3.86849	4.8182
3586.44	0.97144	3586.44	3586.44	3586.44	3586.44	1.87769	2.82359	3.86437	4.81392
3585.01	0.97057	3585.01	3585.01	3585.01	3585.01	1.87483	2.81915	3.86036	4.80968
3583.58	0.96971	3583.58	3583.58	3583.58	3583.58	1.87198	2.81474	3.85638	4.80544
3582.16	0.96879	3582.16	3582.16	3582.16	3582.16	1.86896	2.8103	3.85232	4.80113
3580.73	0.96776	3580.73	3580.73	3580.73	3580.73	1.8657	2.80577	3.84805	4.79671
3579.3	0.96664	3579.3	3579.3	3579.3	3579.3	1.86229	2.80111	3.84362	4.79216
3577.87	0.96548	3577.87	3577.87	3577.87	3577.87	1.85887	2.79638	3.83915	4.78756
3576.44	0.96432	3576.44	3576.44	3576.44	3576.44	1.85549	2.79161	3.83471	4.78294
3575.02	0.96312	3575.02	3575.02	3575.02	3575.02	1.85208	2.78682	3.83022	4.7783
3573.59	0.96184	3573.59	3573.59	3573.59	3573.59	1.84853	2.78197	3.82551	4.77359
3572.16	0.96042	3572.16	3572.16	3572.16	3572.16	1.84483	2.77703	3.82054	4.76877
3570.73	0.95893	3570.73	3570.73	3570.73	3570.73	1.84104	2.77204	3.81543	4.76389
3569.31	0.95745	3569.31	3569.31	3569.31	3569.31	1.83725	2.76706	3.81038	4.75904
3567.88	0.95602	3567.88	3567.88	3567.88	3567.88	1.83351	2.76213	3.80551	4.7543
3566.45	0.95463	3566.45	3566.45	3566.45	3566.45	1.82981	2.75726	3.80076	4.74969
3565.02	0.95326	3565.02	3565.02	3565.02	3565.02	1.8262	2.75244	3.79612	4.74519
3563.6	0.95193	3563.6	3563.6	3563.6	3563.6	1.82274	2.74771	3.79163	4.74081
3562.17	0.95065	3562.17	3562.17	3562.17	3562.17	1.81954	2.74308	3.78734	4.73657
3560.74	0.94942	3560.74	3560.74	3560.74	3560.74	1.81653	2.73854	3.78317	4.73243
3559.31	0.94815	3559.31	3559.31	3559.31	3559.31	1.81354	2.73406	3.77898	4.72827
3557.88	0.9468	3557.88	3557.88	3557.88	3557.88	1.8104	2.72958	3.7746	4.72399
3556.46	0.94532	3556.46	3556.46	3556.46	3556.46	1.80694	2.72507	3.76996	4.71955
3555.03	0.94371	3555.03	3555.03	3555.03	3555.03	1.80315	2.72054	3.7651	4.71498
3553.6	0.94203	3553.6	3553.6	3553.6	3553.6	1.79915	2.716	3.76009	4.71033
3552.17	0.94031	3552.17	3552.17	3552.17	3552.17	1.79509	2.71149	3.75504	4.70569
3550.75	0.9386	3550.75	3550.75	3550.75	3550.75	1.79111	2.70703	3.75007	4.70115
3549.32	0.93692	3549.32	3549.32	3549.32	3549.32	1.78725	2.70268	3.74519	4.69673
3547.89	0.93525	3547.89	3547.89	3547.89	3547.89	1.78349	2.69845	3.7404	4.69245
3546.46	0.93361	3546.46	3546.46	3546.46	3546.46	1.77984	2.69433	3.7357	4.68832
3545.03	0.93202	3545.03	3545.03	3545.03	3545.03	1.77639	2.69033	3.73116	4.68438
3543.61	0.93055	3543.61	3543.61	3543.61	3543.61	1.77322	2.68649	3.72689	4.68069
3542.18	0.92922	3542.18	3542.18	3542.18	3542.18	1.7704	2.68283	3.723	4.67726
3540.75	0.92805	3540.75	3540.75	3540.75	3540.75	1.76789	2.67938	3.71948	4.6741
3539.32	0.927	3539.32	3539.32	3539.32	3539.32	1.76561	2.67611	3.71624	4.67115
3537.9	0.92603	3537.9	3537.9	3537.9	3537.9	1.7634	2.673	3.71315	4.66833
3536.47	0.92509	3536.47	3536.47	3536.47	3536.47	1.76119	2.67001	3.71012	4.66559
3535.04	0.92421	3535.04	3535.04	3535.04	3535.04	1.75897	2.66718	3.70718	4.66291
3533.61	0.92339	3533.61	3533.61	3533.61	3533.61	1.75678	2.66448	3.70433	4.6603
3532.19	0.92259	3532.19	3532.19	3532.19	3532.19	1.75458	2.6619	3.70151	4.65775
3530.76	0.92178	3530.76	3530.76	3530.76	3530.76	1.75235	2.65943	3.69869	4.65524
3529.33	0.92099	3529.33	3529.33	3529.33	3529.33	1.75013	2.65709	3.69593	4.65278
3527.9	0.92025	3527.9	3527.9	3527.9	3527.9	1.74803	2.65493	3.69336	4.65045
3526.47	0.91962	3526.47	3526.47	3526.47	3526.47	1.74608	2.65298	3.69104	4.64829
3525.05	0.91908	3525.05	3525.05	3525.05	3525.05	1.7443	2.65124	3.68895	4.64634
3523.62	0.91863	3523.62	3523.62	3523.62	3523.62	1.7426	2.64968	3.68702	4.64456
3522.19	0.91826	3522.19	3522.19	3522.19	3522.19	1.74098	2.64828	3.68518	4.64297
3520.76	0.91799	3520.76	3520.76	3520.76	3520.76	1.73948	2.64705	3.6835	4.64158
3519.34	0.91788	3519.34	3519.34	3519.34	3519.34	1.73822	2.64601	3.68209	4.64043
3517.91	0.91792	3517.91	3517.91	3517.91	3517.91	1.73721	2.64518	3.681	4.63952
3516.48	0.91808	3516.48	3516.48	3516.48	3516.48	1.73637	2.64456	3.68017	4.6388
3515.05	0.91831	3515.05	3515.05	3515.05	3515.05	1.7356	2.6441	3.67953	4.63816
3513.63	0.91861	3513.63	3513.63	3513.63	3513.63	1.73488	2.64381	3.67905	4.63759
3512.2	0.91898	3512.2	3512.2	3512.2	3512.2	1.73417	2.64364	3.67867	4.63706
3510.77	0.91938	3510.77	3510.77	3510.77	3510.77	1.73339	2.64359	3.67835	4.63655
3509.34	0.9198	3509.34	3509.34	3509.34	3509.34	1.73247	2.64364	3.678	4.63601
3507.91	0.92024	3507.91	3507.91	3507.91	3507.91	1.73145	2.64381	3.67767	4.6355
3506.49	0.92076	3506.49	3506.49	3506.49	3506.49	1.73049	2.64413	3.67748	4.63509
3505.06	0.92139	3505.06	3505.06	3505.06	3505.06	1.72974	2.64462	3.67753	4.63488
3503.63	0.92211	3503.63	3503.63	3503.63	3503.63	1.72927	2.64528	3.67786	4.6349
3502.2	0.92289	3502.2	3502.2	3502.2	3502.2	1.72903	2.64606	3.67843	4.63512
3500.78	0.92371	3500.78	3500.78	3500.78	3500.78	1.72893	2.64694	3.67915	4.63547
3499.35	0.92456	3499.35	3499.35	3499.35	3499.35	1.7289	2.6479	3.67997	4.63592
3497.92	0.92546	3497.92	3497.92	3497.92	3497.92	1.72893	2.64895	3.68085	4.63646
3496.49	0.92645	3496.49	3496.49	3496.49	3496.49	1.7291	2.6501	3.68185	4.63715
3495.06	0.92753	3495.06	3495.06	3495.06	3495.06	1.72945	2.65134	3.68297	4.63798
3493.64	0.92867	3493.64	3493.64	3493.64	3493.64	1.72991	2.65268	3.6842	4.6389
3492.21	0.92983	3492.21	3492.21	3492.21	3492.21	1.73037	2.65407	3.6855	4.63986
3490.78	0.93099	3490.78	3490.78	3490.78	3490.78	1.73076	2.6555	3.68679	4.64079
3489.35	0.9321	3489.35	3489.35	3489.35	3489.35	1.73102	2.65695	3.68805	4.64164
3487.93	0.93317	3487.93	3487.93	3487.93	3487.93	1.73121	2.65842	3.68927	4.64241
3486.5	0.93425	3486.5	3486.5	3486.5	3486.5	1.73143	2.65991	3.6905	4.64316
3485.07	0.93538	3485.07	3485.07	3485.07	3485.07	1.73176	2.66141	3.6918	4.64392
3483.64	0.93653	3483.64	3483.64	3483.64	3483.64	1.73212	2.66293	3.69306	4.64468
3482.22	0.93761	3482.22	3482.22	3482.22	3482.22	1.73231	2.6644	3.69413	4.64535
3480.79	0.93856	3480.79	3480.79	3480.79	3480.79	1.73214	2.6658	3.69492	4.64586
3479.36	0.93937	3479.36	3479.36	3479.36	3479.36	1.73164	2.6671	3.69547	4.64621
3477.93	0.94009	3477.93	3477.93	3477.93	3477.93	1.73099	2.66834	3.69591	4.64652
3476.5	0.94077	3476.5	3476.5	3476.5	3476.5	1.73035	2.6695	3.69636	4.64686
3475.08	0.94144	3475.08	3475.08	3475.08	3475.08	1.72978	2.67059	3.69684	4.64724
3473.65	0.94207	3473.65	3473.65	3473.65	3473.65	1.72926	2.67159	3.69725	4.64764
3472.22	0.94265	3472.22	3472.22	3472.22	3472.22	1.72873	2.67246	3.6975	4.64802
3470.79	0.94319	3470.79	3470.79	3470.79	3470.79	1.72825	2.67323	3.69759	4.64836
3469.37	0.9437	3469.37	3469.37	3469.37	3469.37	1.72789	2.67391	3.69758	4.64871
3467.94	0.94417	3467.94	3467.94	3467.94	3467.94	1.72766	2.67451	3.69751	4.64906
3466.51	0.94457	3466.51	3466.51	3466.51	3466.51	1.72748	2.675	3.69738	4.64934
3465.08	0.94488	3465.08	3465.08	3465.08	3465.08	1.72728	2.67534	3.69715	4.64951
3463.65	0.94513	3463.65	3463.65	3463.65	3463.65	1.72705	2.6755	3.69678	4.64959
3462.23	0.94531	3462.23	3462.23	3462.23	3462.23	1.72685	2.67546	3.69624	4.6496
3460.8	0.9454	3460.8	3460.8	3460.8	3460.8	1.72668	2.67517	3.69542	4.6495
3459.37	0.94536	3459.37	3459.37	3459.37	3459.37	1.72652	2.67454	3.69418	4.64926
3457.94	0.94515	3457.94	3457.94	3457.94	3457.94	1.7263	2.67348	3.69234	4.64877
3456.52	0.9447	3456.52	3456.52	3456.52	3456.52	1.72587	2.67189	3.68982	4.64794
3455.09	0.94395	3455.09	3455.09	3455.09	3455.09	1.72508	2.66969	3.68649	4.64665
3453.66	0.94285	3453.66	3453.66	3453.66	3453.66	1.72383	2.66683	3.68234	4.64483
3452.23	0.94142	3452.23	3452.23	3452.23	3452.23	1.72211	2.66332	3.67748	4.64248
3450.81	0.93972	3450.81	3450.81	3450.81	3450.81	1.71999	2.65924	3.67202	4.63968
3449.38	0.93779	3449.38	3449.38	3449.38	3449.38	1.71751	2.65473	3.66611	4.63647
3447.95	0.9357	3447.95	3447.95	3447.95	3447.95	1.71468	2.64993	3.65988	4.63294
3446.52	0.93351	3446.52	3446.52	3446.52	3446.52	1.71159	2.645	3.65349	4.62921
3445.09	0.93132	3445.09	3445.09	3445.09	3445.09	1.70838	2.64015	3.64725	4.62544
3443.67	0.92924	3443.67	3443.67	3443.67	3443.67	1.70525	2.63559	3.64149	4.62183
3442.24	0.92741	3442.24	3442.24	3442.24	3442.24	1.70238	2.63155	3.63656	4.61858
3440.81	0.92592	3440.81	3440.81	3440.81	3440.81	1.69992	2.62823	3.63277	4.61587
3439.38	0.92489	3439.38	3439.38	3439.38	3439.38	1.69802	2.6258	3.63034	4.61385
3437.96	0.92437	3437.96	3437.96	3437.96	3437.96	1.69677	2.62437	3.62937	4.61265
3436.53	0.9244	3436.53	3436.53	3436.53	3436.53	1.69617	2.62399	3.62982	4.61235
3435.1	0.92496	3435.1	3435.1	3435.1	3435.1	1.69619	2.62463	3.63154	4.61294
3433.67	0.92599	3433.67	3433.67	3433.67	3433.67	1.69675	2.62619	3.63434	4.61433
3432.24	0.92743	3432.24	3432.24	3432.24	3432.24	1.69782	2.62854	3.63805	4.61645
3430.82	0.92921	3430.82	3430.82	3430.82	3430.82	1.69937	2.63154	3.64253	4.61919
3429.39	0.93128	3429.39	3429.39	3429.39	3429.39	1.70142	2.635	3.64769	4.62243
3427.96	0.93355	3427.96	3427.96	3427.96	3427.96	1.70387	2.63873	3.65331	4.62602
3426.53	0.93588	3426.53	3426.53	3426.53	3426.53	1.70654	2.64253	3.65911	4.62975
3425.11	0.93814	3425.11	3425.11	3425.11	3425.11	1.70921	2.64622	3.66479	4.63343
3423.68	0.9402	3423.68	3423.68	3423.68	3423.68	1.71164	2.64966	3.67005	4.63688
3422.25	0.94197	3422.25	3422.25	3422.25	3422.25	1.71366	2.65278	3.67467	4.63995
3420.82	0.94341	3420.82	3420.82	3420.82	3420.82	1.7152	2.65553	3.67858	4.64259
3419.4	0.94455	3419.4	3419.4	3419.4	3419.4	1.71641	2.65789	3.6819	4.64485
3417.97	0.94547	3417.97	3417.97	3417.97	3417.97	1.71748	2.65989	3.68483	4.64686
3416.54	0.94619	3416.54	3416.54	3416.54	3416.54	1.71844	2.66153	3.68748	4.64866
3415.11	0.94662	3415.11	3415.11	3415.11	3415.11	1.71911	2.66281	3.6897	4.65015
3413.68	0.94665	3413.68	3413.68	3413.68	3413.68	1.71929	2.6637	3.69127	4.65122
3412.26	0.94641	3412.26	3412.26	3412.26	3412.26	1.71902	2.66424	3.6923	4.65195
3410.83	0.94604	3410.83	3410.83	3410.83	3410.83	1.71853	2.6645	3.69298	4.65246
3409.4	0.94562	3409.4	3409.4	3409.4	3409.4	1.71807	2.66453	3.69343	4.6529
3407.97	0.94519	3407.97	3407.97	3407.97	3407.97	1.71772	2.66435	3.69373	4.65333
3406.55	0.9447	3406.55	3406.55	3406.55	3406.55	1.71737	2.66394	3.69386	4.65369
3405.12	0.9441	3405.12	3405.12	3405.12	3405.12	1.71688	2.66328	3.69376	4.65389
3403.69	0.94335	3403.69	3403.69	3403.69	3403.69	1.71618	2.66234	3.69341	4.65388
3402.26	0.94244	3402.26	3402.26	3402.26	3402.26	1.71537	2.66115	3.69286	4.65369
3400.84	0.94139	3400.84	3400.84	3400.84	3400.84	1.71459	2.65973	3.69216	4.65338
3399.41	0.94021	3399.41	3399.41	3399.41	3399.41	1.7139	2.65809	3.6913	4.65299
3397.98	0.93894	3397.98	3397.98	3397.98	3397.98	1.71334	2.65623	3.69026	4.6525
3396.55	0.93756	3396.55	3396.55	3396.55	3396.55	1.71291	2.65417	3.68903	4.65196
3395.12	0.93606	3395.12	3395.12	3395.12	3395.12	1.7126	2.65192	3.68767	4.65135
3393.7	0.93443	3393.7	3393.7	3393.7	3393.7	1.71239	2.64947	3.68621	4.65068
3392.27	0.93268	3392.27	3392.27	3392.27	3392.27	1.71226	2.64683	3.6847	4.64996
3390.84	0.93079	3390.84	3390.84	3390.84	3390.84	1.71221	2.64399	3.68315	4.6492
3389.41	0.92876	3389.41	3389.41	3389.41	3389.41	1.71213	2.64091	3.68148	4.64834
3387.99	0.92652	3387.99	3387.99	3387.99	3387.99	1.71189	2.63758	3.67952	4.64731
3386.56	0.924	3386.56	3386.56	3386.56	3386.56	1.71134	2.63394	3.67709	4.64603
3385.13	0.92123	3385.13	3385.13	3385.13	3385.13	1.71049	2.62999	3.67418	4.64445
3383.7	0.91833	3383.7	3383.7	3383.7	3383.7	1.70938	2.62575	3.67099	4.64264
3382.27	0.91524	3382.27	3382.27	3382.27	3382.27	1.70802	2.62117	3.66745	4.64055
3380.85	0.91187	3380.85	3380.85	3380.85	3380.85	1.70631	2.61624	3.66348	4.63812
3379.42	0.9082	3379.42	3379.42	3379.42	3379.42	1.70414	2.61092	3.65905	4.63527
3377.99	0.9042	3377.99	3377.99	3377.99	3377.99	1.70145	2.60525	3.65414	4.63199
3376.56	0.89992	3376.56	3376.56	3376.56	3376.56	1.69835	2.59927	3.64883	4.62833
3375.14	0.89541	3375.14	3375.14	3375.14	3375.14	1.69501	2.59304	3.64325	4.62442
3373.71	0.89075	3373.71	3373.71	3373.71	3373.71	1.69163	2.58663	3.6375	4.62036
3372.28	0.88599	3372.28	3372.28	3372.28	3372.28	1.68835	2.58007	3.63169	4.61624
3370.85	0.88117	3370.85	3370.85	3370.85	3370.85	1.6852	2.57339	3.6259	4.61209
3369.43	0.87633	3369.43	3369.43	3369.43	3369.43	1.68221	2.56663	3.6202	4.60796
3368	0.87146	3368	3368	3368	3368	1.67939	2.5598	3.61464	4.60386
3366.57	0.86655	3366.57	3366.57	3366.57	3366.57	1.67669	2.55293	3.60921	4.59976
3365.14	0.86154	3365.14	3365.14	3365.14	3365.14	1.67397	2.546	3.60378	4.59561
3363.71	0.85638	3363.71	3363.71	3363.71	3363.71	1.67109	2.53898	3.5982	4.59132
3362.29	0.85104	3362.29	3362.29	3362.29	3362.29	1.668	2.53189	3.59243	4.58689
3360.86	0.8456	3360.86	3360.86	3360.86	3360.86	1.66482	2.52477	3.58655	4.5824
3359.43	0.84012	3359.43	3359.43	3359.43	3359.43	1.6617	2.51768	3.58068	4.57791
3358	0.83462	3358	3358	3358	3358	1.6586	2.51065	3.57488	4.57343
3356.58	0.82904	3356.58	3356.58	3356.58	3356.58	1.65535	2.50366	3.56904	4.56884
3355.15	0.82329	3355.15	3355.15	3355.15	3355.15	1.65178	2.49666	3.56307	4.56405
3353.72	0.81734	3353.72	3353.72	3353.72	3353.72	1.64778	2.48965	3.55686	4.559
3352.29	0.8112	3352.29	3352.29	3352.29	3352.29	1.6434	2.48265	3.55044	4.55374
3350.86	0.80495	3350.86	3350.86	3350.86	3350.86	1.63877	2.47573	3.54392	4.54836
3349.44	0.79868	3349.44	3349.44	3349.44	3349.44	1.63405	2.46896	3.53745	4.54298
3348.01	0.79248	3348.01	3348.01	3348.01	3348.01	1.62937	2.4624	3.53116	4.53772
3346.58	0.7864	3346.58	3346.58	3346.58	3346.58	1.6248	2.45607	3.52514	4.53262
3345.15	0.78047	3345.15	3345.15	3345.15	3345.15	1.62038	2.44998	3.51946	4.52774
3343.73	0.77473	3343.73	3343.73	3343.73	3343.73	1.61618	2.44414	3.51417	4.52312
3342.3	0.76921	3342.3	3342.3	3342.3	3342.3	1.61226	2.43856	3.50934	4.5188
3340.87	0.76392	3340.87	3340.87	3340.87	3340.87	1.60862	2.43326	3.5049	4.51475
3339.44	0.75878	3339.44	3339.44	3339.44	3339.44	1.60512	2.4282	3.50071	4.51088
3338.02	0.7537	3338.02	3338.02	3338.02	3338.02	1.60158	2.42334	3.49654	4.50708
3336.59	0.74864	3336.59	3336.59	3336.59	3336.59	1.59787	2.41863	3.49231	4.50327
3335.16	0.74361	3335.16	3335.16	3335.16	3335.16	1.59406	2.41408	3.4881	4.49948
3333.73	0.73873	3333.73	3333.73	3333.73	3333.73	1.59034	2.40972	3.48409	4.49583
3332.3	0.73407	3332.3	3332.3	3332.3	3332.3	1.58688	2.40562	3.48047	4.49242
3330.88	0.72967	3330.88	3330.88	3330.88	3330.88	1.58372	2.4018	3.47726	4.48925
3329.45	0.72548	3329.45	3329.45	3329.45	3329.45	1.58081	2.39824	3.47438	4.48627
3328.02	0.72148	3328.02	3328.02	3328.02	3328.02	1.57806	2.39491	3.47173	4.48345
3326.59	0.71765	3326.59	3326.59	3326.59	3326.59	1.57545	2.39179	3.46921	4.48079
3325.17	0.71399	3325.17	3325.17	3325.17	3325.17	1.57295	2.38887	3.46681	4.47829
3323.74	0.7105	3323.74	3323.74	3323.74	3323.74	1.57051	2.38615	3.4645	4.47595
3322.31	0.70717	3322.31	3322.31	3322.31	3322.31	1.56809	2.38362	3.46228	4.47375
3320.88	0.70396	3320.88	3320.88	3320.88	3320.88	1.56562	2.38126	3.46017	4.47165
3319.45	0.70084	3319.45	3319.45	3319.45	3319.45	1.56302	2.37905	3.45813	4.46962
3318.03	0.6978	3318.03	3318.03	3318.03	3318.03	1.56024	2.37698	3.45611	4.46762
3316.6	0.69487	3316.6	3316.6	3316.6	3316.6	1.55738	2.37507	3.45409	4.4657
3315.17	0.69217	3315.17	3315.17	3315.17	3315.17	1.55463	2.37336	3.4522	4.46393
3313.74	0.6898	3313.74	3313.74	3313.74	3313.74	1.55219	2.37191	3.4505	4.46243
3312.32	0.68779	3312.32	3312.32	3312.32	3312.32	1.5501	2.37076	3.44903	4.46119
3310.89	0.68614	3310.89	3310.89	3310.89	3310.89	1.54832	2.36988	3.44783	4.4602
3309.46	0.68481	3309.46	3309.46	3309.46	3309.46	1.54685	2.36925	3.44691	4.45944
3308.03	0.6838	3308.03	3308.03	3308.03	3308.03	1.5457	2.36888	3.44634	4.45893
3306.61	0.68312	3306.61	3306.61	3306.61	3306.61	1.54486	2.36876	3.44613	4.45868
3305.18	0.68277	3305.18	3305.18	3305.18	3305.18	1.54432	2.36889	3.44624	4.45869
3303.75	0.68279	3303.75	3303.75	3303.75	3303.75	1.5441	2.36929	3.44669	4.45898
3302.32	0.68321	3302.32	3302.32	3302.32	3302.32	1.54428	2.37	3.44749	4.45962
3300.89	0.68409	3300.89	3300.89	3300.89	3300.89	1.54499	2.37103	3.44874	4.46066
3299.47	0.68543	3299.47	3299.47	3299.47	3299.47	1.54627	2.37242	3.45045	4.46214
3298.04	0.68722	3298.04	3298.04	3298.04	3298.04	1.5481	2.37413	3.45266	4.46405
3296.61	0.68938	3296.61	3296.61	3296.61	3296.61	1.55037	2.37614	3.45534	4.46635
3295.18	0.69185	3295.18	3295.18	3295.18	3295.18	1.55293	2.37841	3.45839	4.46892
3293.76	0.69453	3293.76	3293.76	3293.76	3293.76	1.55559	2.3809	3.46168	4.47166
3292.33	0.69734	3292.33	3292.33	3292.33	3292.33	1.55821	2.38356	3.46508	4.47447
3290.9	0.70026	3290.9	3290.9	3290.9	3290.9	1.56078	2.3864	3.46852	4.47731
3289.47	0.70334	3289.47	3289.47	3289.47	3289.47	1.56344	2.38942	3.47199	4.48025
3288.04	0.70664	3288.04	3288.04	3288.04	3288.04	1.5664	2.39269	3.47564	4.48339
3286.62	0.7102	3286.62	3286.62	3286.62	3286.62	1.56974	2.39622	3.47955	4.48679
3285.19	0.71399	3285.19	3285.19	3285.19	3285.19	1.57336	2.39999	3.48371	4.49039
3283.76	0.7179	3283.76	3283.76	3283.76	3283.76	1.57704	2.40395	3.488	4.49409
3282.33	0.72184	3282.33	3282.33	3282.33	3282.33	1.58064	2.40804	3.49231	4.49782
3280.91	0.72581	3280.91	3280.91	3280.91	3280.91	1.58414	2.41229	3.49661	4.5016
3279.48	0.72985	3279.48	3279.48	3279.48	3279.48	1.58765	2.41671	3.50095	4.5055
3278.05	0.734	3278.05	3278.05	3278.05	3278.05	1.59125	2.42134	3.50538	4.5096
3276.62	0.73831	3276.62	3276.62	3276.62	3276.62	1.59505	2.42622	3.50997	4.51394
3275.2	0.74281	3275.2	3275.2	3275.2	3275.2	1.59916	2.43137	3.51487	4.5186
3273.77	0.74757	3273.77	3273.77	3273.77	3273.77	1.6037	2.43684	3.5202	4.52365
3272.34	0.7526	3272.34	3272.34	3272.34	3272.34	1.60872	2.44266	3.52604	4.52908
3270.91	0.7579	3270.91	3270.91	3270.91	3270.91	1.61416	2.44879	3.53234	4.53487
3269.48	0.76342	3269.48	3269.48	3269.48	3269.48	1.61991	2.45522	3.53906	4.54093
3268.06	0.76913	3268.06	3268.06	3268.06	3268.06	1.62591	2.46193	3.5461	4.54723
3266.63	0.77502	3266.63	3266.63	3266.63	3266.63	1.63219	2.46894	3.55345	4.55373
3265.2	0.78109	3265.2	3265.2	3265.2	3265.2	1.63879	2.47625	3.56114	4.56048
3263.77	0.78734	3263.77	3263.77	3263.77	3263.77	1.64577	2.48389	3.56918	4.56748
3262.35	0.79369	3262.35	3262.35	3262.35	3262.35	1.65305	2.49182	3.5775	4.5747
3260.92	0.80009	3260.92	3260.92	3260.92	3260.92	1.66046	2.49999	3.58601	4.58206
3259.49	0.80646	3259.49	3259.49	3259.49	3259.49	1.6678	2.50833	3.5946	4.58949
3258.06	0.81275	3258.06	3258.06	3258.06	3258.06	1.67498	2.51681	3.60321	4.59693
3256.64	0.81895	3256.64	3256.64	3256.64	3256.64	1.68195	2.52543	3.61181	4.60441
3255.21	0.82504	3255.21	3255.21	3255.21	3255.21	1.68882	2.53421	3.62043	4.61196
3253.78	0.8311	3253.78	3253.78	3253.78	3253.78	1.69574	2.54317	3.62914	4.61969
3252.35	0.83715	3252.35	3252.35	3252.35	3252.35	1.70288	2.55234	3.63804	4.62769
3250.92	0.84325	3250.92	3250.92	3250.92	3250.92	1.71032	2.56174	3.6472	4.63601
3249.5	0.84937	3249.5	3249.5	3249.5	3249.5	1.71802	2.57132	3.6566	4.64459
3248.07	0.85546	3248.07	3248.07	3248.07	3248.07	1.72582	2.58103	3.66621	4.65332
3246.64	0.86146	3246.64	3246.64	3246.64	3246.64	1.73356	2.59081	3.67585	4.66205
3245.21	0.8673	3245.21	3245.21	3245.21	3245.21	1.74114	2.60063	3.68547	4.67071
3243.79	0.873	3243.79	3243.79	3243.79	3243.79	1.74857	2.61049	3.695	4.67929
3242.36	0.87855	3242.36	3242.36	3242.36	3242.36	1.75593	2.62039	3.70447	4.6878
3240.93	0.88398	3240.93	3240.93	3240.93	3240.93	1.76326	2.6303	3.71384	4.69624
3239.5	0.88928	3239.5	3239.5	3239.5	3239.5	1.77059	2.6402	3.72313	4.70461
3238.07	0.89448	3238.07	3238.07	3238.07	3238.07	1.77796	2.65007	3.73237	4.71295
3236.65	0.89958	3236.65	3236.65	3236.65	3236.65	1.78538	2.65988	3.74154	4.72124
3235.22	0.90454	3235.22	3235.22	3235.22	3235.22	1.79277	2.66957	3.75057	4.72947
3233.79	0.90929	3233.79	3233.79	3233.79	3233.79	1.8	2.67907	3.75935	4.73754
3232.36	0.91378	3232.36	3232.36	3232.36	3232.36	1.80696	2.68829	3.76778	4.74541
3230.94	0.91801	3230.94	3230.94	3230.94	3230.94	1.81364	2.69721	3.77585	4.75308
3229.51	0.922	3229.51	3229.51	3229.51	3229.51	1.8201	2.7058	3.78359	4.76055
3228.08	0.92579	3228.08	3228.08	3228.08	3228.08	1.82642	2.71405	3.79104	4.76784
3226.65	0.92939	3226.65	3226.65	3226.65	3226.65	1.83259	2.72193	3.79819	4.77493
3225.23	0.93279	3225.23	3225.23	3225.23	3225.23	1.83859	2.72942	3.805	4.78176
3223.8	0.93598	3223.8	3223.8	3223.8	3223.8	1.84435	2.73646	3.81145	4.78828
3222.37	0.93893	3222.37	3222.37	3222.37	3222.37	1.84981	2.74302	3.81746	4.79442
3220.94	0.94159	3220.94	3220.94	3220.94	3220.94	1.85484	2.74907	3.82296	4.80009
3219.51	0.94392	3219.51	3219.51	3219.51	3219.51	1.85935	2.7546	3.82784	4.80519
3218.09	0.94591	3218.09	3218.09	3218.09	3218.09	1.86332	2.75962	3.83211	4.8097
3216.66	0.94762	3216.66	3216.66	3216.66	3216.66	1.86686	2.76416	3.83581	4.81369
3215.23	0.94912	3215.23	3215.23	3215.23	3215.23	1.87012	2.76828	3.83909	4.81729
3213.8	0.95048	3213.8	3213.8	3213.8	3213.8	1.87318	2.77204	3.84204	4.8206
3212.38	0.95172	3212.38	3212.38	3212.38	3212.38	1.87605	2.77545	3.84469	4.82365
3210.95	0.95283	3210.95	3210.95	3210.95	3210.95	1.87873	2.77856	3.84708	4.8265
3209.52	0.95381	3209.52	3209.52	3209.52	3209.52	1.88123	2.78141	3.84925	4.82919
3208.09	0.95465	3208.09	3208.09	3208.09	3208.09	1.88359	2.78405	3.85121	4.83176
3206.66	0.9554	3206.66	3206.66	3206.66	3206.66	1.88581	2.78656	3.85301	4.83426
3205.24	0.95606	3205.24	3205.24	3205.24	3205.24	1.88794	2.78897	3.85473	4.83671
3203.81	0.95669	3203.81	3203.81	3203.81	3203.81	1.88998	2.79135	3.8564	4.83912
3202.38	0.95731	3202.38	3202.38	3202.38	3202.38	1.89196	2.79374	3.85813	4.84153
3200.95	0.95794	3200.95	3200.95	3200.95	3200.95	1.89394	2.7962	3.85995	4.84396
3199.53	0.95859	3199.53	3199.53	3199.53	3199.53	1.89595	2.79879	3.86193	4.84645
3198.1	0.95929	3198.1	3198.1	3198.1	3198.1	1.89804	2.80155	3.86409	4.84902
3196.67	0.96003	3196.67	3196.67	3196.67	3196.67	1.9002	2.80453	3.86643	4.85168
3195.24	0.96081	3195.24	3195.24	3195.24	3195.24	1.90243	2.80776	3.86892	4.85444
3193.82	0.96168	3193.82	3193.82	3193.82	3193.82	1.90476	2.81127	3.87163	4.85734
3192.39	0.96265	3192.39	3192.39	3192.39	3192.39	1.90723	2.81508	3.87455	4.86039
3190.96	0.96375	3190.96	3190.96	3190.96	3190.96	1.90985	2.81917	3.87775	4.86363
3189.53	0.96494	3189.53	3189.53	3189.53	3189.53	1.91266	2.82357	3.88123	4.8671
3188.1	0.96622	3188.1	3188.1	3188.1	3188.1	1.91564	2.82827	3.88499	4.87083
3186.68	0.96754	3186.68	3186.68	3186.68	3186.68	1.91879	2.83326	3.88899	4.87482
3185.25	0.9689	3185.25	3185.25	3185.25	3185.25	1.92209	2.83854	3.89319	4.87908
3183.82	0.9703	3183.82	3183.82	3183.82	3183.82	1.9255	2.84407	3.89754	4.88359
3182.39	0.97173	3182.39	3182.39	3182.39	3182.39	1.92902	2.84983	3.90202	4.88831
3180.97	0.97322	3180.97	3180.97	3180.97	3180.97	1.93263	2.85579	3.9066	4.89321
3179.54	0.97475	3179.54	3179.54	3179.54	3179.54	1.93631	2.86194	3.91131	4.89824
3178.11	0.9763	3178.11	3178.11	3178.11	3178.11	1.94006	2.86824	3.91611	4.90336
3176.68	0.97783	3176.68	3176.68	3176.68	3176.68	1.94386	2.87464	3.92097	4.90848
3175.25	0.97931	3175.25	3175.25	3175.25	3175.25	1.94767	2.88112	3.92585	4.91357
3173.83	0.98076	3173.83	3173.83	3173.83	3173.83	1.95148	2.88764	3.93072	4.91861
3172.4	0.98215	3172.4	3172.4	3172.4	3172.4	1.95528	2.89416	3.93552	4.92356
3170.97	0.98351	3170.97	3170.97	3170.97	3170.97	1.95906	2.90066	3.94023	4.92844
3169.54	0.98486	3169.54	3169.54	3169.54	3169.54	1.9628	2.90713	3.94485	4.93323
3168.12	0.98616	3168.12	3168.12	3168.12	3168.12	1.96641	2.91351	3.94936	4.93793
3166.69	0.98734	3166.69	3166.69	3166.69	3166.69	1.96977	2.91973	3.95368	4.94244
3165.26	0.98833	3165.26	3165.26	3165.26	3165.26	1.97272	2.92571	3.95769	4.94669
3163.83	0.98912	3163.83	3163.83	3163.83	3163.83	1.97527	2.9314	3.9614	4.95068
3162.41	0.98975	3162.41	3162.41	3162.41	3162.41	1.97752	2.93683	3.96483	4.95448
3160.98	0.99027	3160.98	3160.98	3160.98	3160.98	1.97962	2.94203	3.96808	4.95817
3159.55	0.99071	3159.55	3159.55	3159.55	3159.55	1.98163	2.94701	3.97118	4.96177
3158.12	0.9911	3158.12	3158.12	3158.12	3158.12	1.98358	2.95178	3.97414	4.96527
3156.69	0.99144	3156.69	3156.69	3156.69	3156.69	1.98547	2.95631	3.97696	4.96866
3155.27	0.99175	3155.27	3155.27	3155.27	3155.27	1.98729	2.9606	3.97961	4.9719
3153.84	0.99201	3153.84	3153.84	3153.84	3153.84	1.98896	2.96462	3.9821	4.97491
3152.41	0.99217	3152.41	3152.41	3152.41	3152.41	1.99039	2.96832	3.98434	4.97763
3150.98	0.99225	3150.98	3150.98	3150.98	3150.98	1.99155	2.97169	3.98629	4.97999
3149.56	0.99227	3149.56	3149.56	3149.56	3149.56	1.99248	2.97474	3.98794	4.98203
3148.13	0.99228	3148.13	3148.13	3148.13	3148.13	1.99332	2.97751	3.98939	4.98382
3146.7	0.99234	3146.7	3146.7	3146.7	3146.7	1.99412	2.98003	3.99065	4.98543
3145.27	0.99245	3145.27	3145.27	3145.27	3145.27	1.99487	2.98229	3.99171	4.98684
3143.84	0.99259	3143.84	3143.84	3143.84	3143.84	1.99559	2.9843	3.99263	4.98808
3142.42	0.9927	3142.42	3142.42	3142.42	3142.42	1.99621	2.98603	3.99339	4.98916
3140.99	0.99275	3140.99	3140.99	3140.99	3140.99	1.9967	2.9875	3.99401	4.99006
3139.56	0.99274	3139.56	3139.56	3139.56	3139.56	1.99699	2.9887	3.99448	4.99077
3138.13	0.99267	3138.13	3138.13	3138.13	3138.13	1.99707	2.98966	3.99477	4.99131
3136.71	0.99258	3136.71	3136.71	3136.71	3136.71	1.99704	2.99041	3.99491	4.99174
3135.28	0.99252	3135.28	3135.28	3135.28	3135.28	1.99699	2.991	3.99493	4.99209
3133.85	0.99246	3133.85	3133.85	3133.85	3133.85	1.99695	2.99142	3.99485	4.99237
3132.42	0.99234	3132.42	3132.42	3132.42	3132.42	1.99681	2.99162	3.99465	4.9925
3131	0.99211	3131	3131	3131	3131	1.99646	2.99158	3.99424	4.99237
3129.57	0.99176	3129.57	3129.57	3129.57	3129.57	1.99581	2.99124	3.99356	4.9919
3128.14	0.99133	3128.14	3128.14	3128.14	3128.14	1.99487	2.99062	3.99263	4.9911
3126.71	0.99084	3126.71	3126.71	3126.71	3126.71	1.99369	2.98974	3.99143	4.98999
3125.28	0.99034	3125.28	3125.28	3125.28	3125.28	1.99233	2.98863	3.99	4.98863
3123.86	0.98983	3123.86	3123.86	3123.86	3123.86	1.99084	2.98728	3.98836	4.98704
3122.43	0.98929	3122.43	3122.43	3122.43	3122.43	1.98922	2.98566	3.98651	4.98524
3121	0.98873	3121	3121	3121	3121	1.98752	2.98377	3.98448	4.98327
3119.57	0.98812	3119.57	3119.57	3119.57	3119.57	1.98579	2.98161	3.98233	4.98116
3118.15	0.98753	3118.15	3118.15	3118.15	3118.15	1.98406	2.97917	3.98008	4.97895
3116.72	0.98696	3116.72	3116.72	3116.72	3116.72	1.98238	2.97644	3.97775	4.97662
3115.29	0.98642	3115.29	3115.29	3115.29	3115.29	1.98072	2.97341	3.97533	4.97418
3113.86	0.98586	3113.86	3113.86	3113.86	3113.86	1.97903	2.97005	3.97275	4.97159
3112.44	0.98529	3112.44	3112.44	3112.44	3112.44	1.97725	2.96635	3.97	4.9688
3111.01	0.98464	3111.01	3111.01	3111.01	3111.01	1.97541	2.96229	3.96707	4.96581
3109.58	0.98392	3109.58	3109.58	3109.58	3109.58	1.97349	2.95788	3.96397	4.96262
3108.15	0.98309	3108.15	3108.15	3108.15	3108.15	1.97144	2.9531	3.96063	4.95917
3106.72	0.98211	3106.72	3106.72	3106.72	3106.72	1.96908	2.94789	3.95695	4.95534
3105.3	0.98091	3105.3	3105.3	3105.3	3105.3	1.96624	2.94218	3.95277	4.951
3103.87	0.97944	3103.87	3103.87	3103.87	3103.87	1.96279	2.9359	3.94798	4.94606
3102.44	0.9777	3102.44	3102.44	3102.44	3102.44	1.95874	2.92906	3.94254	4.94052
3101.01	0.97571	3101.01	3101.01	3101.01	3101.01	1.95421	2.92171	3.93652	4.93449
3099.59	0.97351	3099.59	3099.59	3099.59	3099.59	1.94938	2.91394	3.93004	4.92809
3098.16	0.97111	3098.16	3098.16	3098.16	3098.16	1.94436	2.90583	3.92317	4.92142
3096.73	0.96854	3096.73	3096.73	3096.73	3096.73	1.93914	2.89741	3.91598	4.91452
3095.3	0.96579	3095.3	3095.3	3095.3	3095.3	1.93365	2.88868	3.90846	4.90741
3093.87	0.96289	3093.87	3093.87	3093.87	3093.87	1.92782	2.87965	3.90062	4.90005
3092.45	0.95984	3092.45	3092.45	3092.45	3092.45	1.92168	2.87038	3.89248	4.8925
3091.02	0.9567	3091.02	3091.02	3091.02	3091.02	1.91536	2.86097	3.88412	4.88484
3089.59	0.95355	3089.59	3089.59	3089.59	3089.59	1.90906	2.85154	3.87568	4.87722
3088.16	0.95044	3088.16	3088.16	3088.16	3088.16	1.903	2.84222	3.86734	4.86977
3086.74	0.94744	3086.74	3086.74	3086.74	3086.74	1.89733	2.83312	3.85924	4.86259
3085.31	0.94463	3085.31	3085.31	3085.31	3085.31	1.89215	2.82432	3.85154	4.85577
3083.88	0.94205	3083.88	3083.88	3083.88	3083.88	1.88753	2.81592	3.84438	4.8494
3082.45	0.93975	3082.45	3082.45	3082.45	3082.45	1.88351	2.80802	3.83786	4.84356
3081.03	0.93776	3081.03	3081.03	3081.03	3081.03	1.8801	2.8007	3.83197	4.83829
3079.6	0.93606	3079.6	3079.6	3079.6	3079.6	1.87727	2.79403	3.82669	4.83364
3078.17	0.93462	3078.17	3078.17	3078.17	3078.17	1.87502	2.78805	3.822	4.82963
3076.74	0.93346	3076.74	3076.74	3076.74	3076.74	1.8734	2.78283	3.81794	4.82634
3075.31	0.93259	3075.31	3075.31	3075.31	3075.31	1.87252	2.77842	3.8146	4.82385
3073.89	0.93206	3073.89	3073.89	3073.89	3073.89	1.87248	2.77491	3.81211	4.82224
3072.46	0.93192	3072.46	3072.46	3072.46	3072.46	1.87329	2.77234	3.81052	4.82156
3071.03	0.93216	3071.03	3071.03	3071.03	3071.03	1.87486	2.77075	3.80981	4.82177
3069.6	0.93276	3069.6	3069.6	3069.6	3069.6	1.87705	2.77014	3.80992	4.82281
3068.18	0.93367	3068.18	3068.18	3068.18	3068.18	1.87973	2.77048	3.81081	4.82463
3066.75	0.93486	3066.75	3066.75	3066.75	3066.75	1.88282	2.77175	3.81242	4.82716
3065.32	0.93624	3065.32	3065.32	3065.32	3065.32	1.88619	2.77389	3.81464	4.8303
3063.89	0.93774	3063.89	3063.89	3063.89	3063.89	1.88977	2.77683	3.81739	4.83397
3062.46	0.9394	3062.46	3062.46	3062.46	3062.46	1.89363	2.78059	3.82071	4.83815
3061.04	0.94131	3061.04	3061.04	3061.04	3061.04	1.89795	2.78518	3.82474	4.84291
3059.61	0.94351	3059.61	3059.61	3059.61	3059.61	1.90284	2.79059	3.82958	4.84826
3058.18	0.94598	3058.18	3058.18	3058.18	3058.18	1.90821	2.79674	3.83511	4.85414
3056.75	0.94859	3056.75	3056.75	3056.75	3056.75	1.91381	2.80349	3.84114	4.86038
3055.33	0.95121	3055.33	3055.33	3055.33	3055.33	1.91937	2.81069	3.84744	4.86683
3053.9	0.95375	3053.9	3053.9	3053.9	3053.9	1.92474	2.81825	3.85381	4.87337
3052.47	0.95621	3052.47	3052.47	3052.47	3052.47	1.92989	2.82609	3.8602	4.87998
3051.04	0.95864	3051.04	3051.04	3051.04	3051.04	1.93494	2.8342	3.86669	4.88669
3049.62	0.96115	3049.62	3049.62	3049.62	3049.62	1.94001	2.84256	3.87335	4.89355
3048.19	0.96375	3048.19	3048.19	3048.19	3048.19	1.94511	2.85106	3.88018	4.90049
3046.76	0.96639	3046.76	3046.76	3046.76	3046.76	1.95016	2.8596	3.88711	4.90739
3045.33	0.96902	3045.33	3045.33	3045.33	3045.33	1.95512	2.86807	3.89401	4.91418
3043.9	0.97161	3043.9	3043.9	3043.9	3043.9	1.95995	2.87642	3.90081	4.92077
3042.48	0.97412	3042.48	3042.48	3042.48	3042.48	1.9646	2.88459	3.90745	4.9271
3041.05	0.97656	3041.05	3041.05	3041.05	3041.05	1.96906	2.89252	3.9139	4.93312
3039.62	0.97891	3039.62	3039.62	3039.62	3039.62	1.97325	2.90011	3.92008	4.93877
3038.19	0.98113	3038.19	3038.19	3038.19	3038.19	1.97708	2.90725	3.92594	4.94396
3036.77	0.98322	3036.77	3036.77	3036.77	3036.77	1.98044	2.91384	3.93137	4.94863
3035.34	0.98515	3035.34	3035.34	3035.34	3035.34	1.98338	2.91984	3.9364	4.95276
3033.91	0.98692	3033.91	3033.91	3033.91	3033.91	1.98594	2.92523	3.94099	4.95637
3032.48	0.98847	3032.48	3032.48	3032.48	3032.48	1.98814	2.92996	3.94507	4.95943
3031.05	0.9897	3031.05	3031.05	3031.05	3031.05	1.98986	2.93395	3.94844	4.96189
3029.63	0.99051	3029.63	3029.63	3029.63	3029.63	1.99093	2.93707	3.95088	4.96364
3028.2	0.99088	3028.2	3028.2	3028.2	3028.2	1.99121	2.93924	3.95228	4.96457
3026.77	0.99084	3026.77	3026.77	3026.77	3026.77	1.99057	2.9404	3.95261	4.96464
3025.34	0.99043	3025.34	3025.34	3025.34	3025.34	1.98904	2.94054	3.95193	4.96384
3023.92	0.98971	3023.92	3023.92	3023.92	3023.92	1.98667	2.93968	3.95035	4.96223
3022.49	0.98871	3022.49	3022.49	3022.49	3022.49	1.98359	2.93783	3.94794	4.95985
3021.06	0.98741	3021.06	3021.06	3021.06	3021.06	1.97982	2.93495	3.94473	4.95669
3019.63	0.9858	3019.63	3019.63	3019.63	3019.63	1.97541	2.93098	3.94067	4.95269
3018.21	0.98389	3018.21	3018.21	3018.21	3018.21	1.97038	2.92584	3.93574	4.94782
3016.78	0.98173	3016.78	3016.78	3016.78	3016.78	1.96482	2.91949	3.92994	4.94204
3015.35	0.97935	3015.35	3015.35	3015.35	3015.35	1.95877	2.91189	3.92327	4.93533
3013.92	0.97671	3013.92	3013.92	3013.92	3013.92	1.95216	2.90294	3.91566	4.9276
3012.49	0.97369	3012.49	3012.49	3012.49	3012.49	1.94484	2.8925	3.9069	4.91871
3011.07	0.97014	3011.07	3011.07	3011.07	3011.07	1.93656	2.88039	3.89681	4.90848
3009.64	0.96595	3009.64	3009.64	3009.64	3009.64	1.92717	2.86642	3.88515	4.89678
3008.21	0.96105	3008.21	3008.21	3008.21	3008.21	1.91656	2.85044	3.87179	4.88349
3006.78	0.95533	3006.78	3006.78	3006.78	3006.78	1.90461	2.83233	3.85649	4.86849
3005.36	0.94866	3005.36	3005.36	3005.36	3005.36	1.8911	2.81197	3.839	4.85157
3003.93	0.94086	3003.93	3003.93	3003.93	3003.93	1.87582	2.78924	3.81908	4.83257
3002.5	0.9318	3002.5	3002.5	3002.5	3002.5	1.8586	2.76407	3.79669	4.81137
3001.07	0.92138	3001.07	3001.07	3001.07	3001.07	1.83932	2.73642	3.77183	4.7879
2999.64	0.90949	2999.64	2999.64	2999.64	2999.64	1.81788	2.70639	3.74458	4.76214
2998.22	0.89601	2998.22	2998.22	2998.22	2998.22	1.79428	2.67417	3.71504	4.73418
2996.79	0.88089	2996.79	2996.79	2996.79	2996.79	1.7686	2.64007	3.6835	4.70421
2995.36	0.86411	2995.36	2995.36	2995.36	2995.36	1.74103	2.60451	3.65029	4.67254
2993.93	0.84573	2993.93	2993.93	2993.93	2993.93	1.71179	2.56797	3.6159	4.63953
2992.51	0.82582	2992.51	2992.51	2992.51	2992.51	1.68115	2.53093	3.58085	4.6056
2991.08	0.8045	2991.08	2991.08	2991.08	2991.08	1.64943	2.4939	3.54575	4.5712
2989.65	0.7819	2989.65	2989.65	2989.65	2989.65	1.61703	2.45739	3.51119	4.53681
2988.22	0.7582	2988.22	2988.22	2988.22	2988.22	1.58432	2.42191	3.47773	4.5029
2986.8	0.73359	2986.8	2986.8	2986.8	2986.8	1.55168	2.38792	3.44584	4.4699
2985.37	0.70836	2985.37	2985.37	2985.37	2985.37	1.51953	2.35579	3.41582	4.43824
2983.94	0.68284	2983.94	2983.94	2983.94	2983.94	1.48831	2.32582	3.38792	4.40828
2982.51	0.65755	2982.51	2982.51	2982.51	2982.51	1.45859	2.29828	3.36236	4.38043
2981.08	0.63311	2981.08	2981.08	2981.08	2981.08	1.43103	2.27339	3.33936	4.35508
2979.66	0.61022	2979.66	2979.66	2979.66	2979.66	1.40636	2.25138	3.31911	4.33266
2978.23	0.5896	2978.23	2978.23	2978.23	2978.23	1.38528	2.2325	3.30183	4.31356
2976.8	0.57198	2976.8	2976.8	2976.8	2976.8	1.36847	2.21701	3.28779	4.29816
2975.37	0.55804	2975.37	2975.37	2975.37	2975.37	1.35656	2.20511	3.27732	4.28679
2973.95	0.54829	2973.95	2973.95	2973.95	2973.95	1.35	2.19694	3.27067	4.27968
2972.52	0.54302	2972.52	2972.52	2972.52	2972.52	1.34899	2.19251	3.26796	4.27691
2971.09	0.54225	2971.09	2971.09	2971.09	2971.09	1.35349	2.19177	3.26925	4.27842
2969.66	0.54577	2969.66	2969.66	2969.66	2969.66	1.36322	2.19459	3.27448	4.28402
2968.24	0.55317	2968.24	2968.24	2968.24	2968.24	1.37762	2.20074	3.28354	4.29338
2966.81	0.56382	2966.81	2966.81	2966.81	2966.81	1.39583	2.20991	3.29613	4.30603
2965.38	0.57701	2965.38	2965.38	2965.38	2965.38	1.4169	2.22166	3.31185	4.32142
2963.95	0.59195	2963.95	2963.95	2963.95	2963.95	1.43985	2.23547	3.33023	4.33892
2962.52	0.60781	2962.52	2962.52	2962.52	2962.52	1.46362	2.25069	3.35068	4.35781
2961.1	0.62369	2961.1	2961.1	2961.1	2961.1	1.48708	2.26657	3.37232	4.37726
2959.67	0.63864	2959.67	2959.67	2959.67	2959.67	1.50904	2.2823	3.39408	4.3963
2958.24	0.6518	2958.24	2958.24	2958.24	2958.24	1.52841	2.29707	3.41481	4.41396
2956.81	0.66246	2956.81	2956.81	2956.81	2956.81	1.54436	2.31015	3.43348	4.42941
2955.39	0.67021	2955.39	2955.39	2955.39	2955.39	1.55642	2.32095	3.44924	4.44199
2953.96	0.67492	2953.96	2953.96	2953.96	2953.96	1.56446	2.32906	3.46147	4.45129
2952.53	0.67675	2952.53	2952.53	2952.53	2952.53	1.56862	2.33428	3.46985	4.45713
2951.1	0.67604	2951.1	2951.1	2951.1	2951.1	1.56925	2.33665	3.47432	4.45954
2949.67	0.67325	2949.67	2949.67	2949.67	2949.67	1.56684	2.33637	3.4751	4.45875
2948.25	0.66885	2948.25	2948.25	2948.25	2948.25	1.56197	2.33381	3.47254	4.45506
2946.82	0.66326	2946.82	2946.82	2946.82	2946.82	1.55522	2.32932	3.46721	4.44889
2945.39	0.65685	2945.39	2945.39	2945.39	2945.39	1.54717	2.32333	3.4597	4.44067
2943.96	0.64995	2943.96	2943.96	2943.96	2943.96	1.5384	2.31625	3.45069	4.43088
2942.54	0.6429	2942.54	2942.54	2942.54	2942.54	1.52944	2.30858	3.44093	4.42005
2941.11	0.63607	2941.11	2941.11	2941.11	2941.11	1.52084	2.30083	3.43121	4.40876
2939.68	0.62981	2939.68	2939.68	2939.68	2939.68	1.51306	2.29349	3.42225	4.39757
2938.25	0.62439	2938.25	2938.25	2938.25	2938.25	1.50645	2.287	3.41468	4.38702
2936.83	0.61998	2936.83	2936.83	2936.83	2936.83	1.50124	2.28166	3.40897	4.37756
2935.4	0.61666	2935.4	2935.4	2935.4	2935.4	1.49754	2.27765	3.40543	4.36956
2933.97	0.61444	2933.97	2933.97	2933.97	2933.97	1.49539	2.27504	3.40422	4.36329
2932.54	0.61324	2932.54	2932.54	2932.54	2932.54	1.49469	2.2738	3.40522	4.35891
2931.11	0.61297	2931.11	2931.11	2931.11	2931.11	1.49528	2.27386	3.40822	4.35648
2929.69	0.61355	2929.69	2929.69	2929.69	2929.69	1.49705	2.27515	3.41301	4.35606
2928.26	0.61488	2928.26	2928.26	2928.26	2928.26	1.49985	2.27755	3.41933	4.35762
2926.83	0.61686	2926.83	2926.83	2926.83	2926.83	1.50357	2.28092	3.42698	4.36113
2925.4	0.6193	2925.4	2925.4	2925.4	2925.4	1.50805	2.2851	3.43575	4.3665
2923.98	0.62204	2923.98	2923.98	2923.98	2923.98	1.51315	2.28996	3.44558	4.37359
2922.55	0.62484	2922.55	2922.55	2922.55	2922.55	1.51868	2.29532	3.4564	4.38225
2921.12	0.62748	2921.12	2921.12	2921.12	2921.12	1.52442	2.30104	3.46809	4.39224
2919.69	0.62976	2919.69	2919.69	2919.69	2919.69	1.53015	2.30694	3.48051	4.40327
2918.26	0.6315	2918.26	2918.26	2918.26	2918.26	1.53567	2.31288	3.49343	4.41501
2916.84	0.6326	2916.84	2916.84	2916.84	2916.84	1.54078	2.3187	3.50663	4.42712
2915.41	0.63302	2915.41	2915.41	2915.41	2915.41	1.54535	2.32432	3.51999	4.43931
2913.98	0.63277	2913.98	2913.98	2913.98	2913.98	1.54935	2.32969	3.53348	4.45136
2912.55	0.6319	2912.55	2912.55	2912.55	2912.55	1.55282	2.33483	3.54718	4.46311
2911.13	0.63038	2911.13	2911.13	2911.13	2911.13	1.55578	2.33974	3.56109	4.47441
2909.7	0.62814	2909.7	2909.7	2909.7	2909.7	1.55816	2.34442	3.57512	4.48513
2908.27	0.62513	2908.27	2908.27	2908.27	2908.27	1.55982	2.34883	3.58922	4.49511
2906.84	0.62138	2906.84	2906.84	2906.84	2906.84	1.56073	2.35294	3.60325	4.50433
2905.42	0.61701	2905.42	2905.42	2905.42	2905.42	1.56094	2.35673	3.61715	4.5128
2903.99	0.61214	2903.99	2903.99	2903.99	2903.99	1.56053	2.3602	3.63076	4.52057
2902.56	0.60691	2902.56	2902.56	2902.56	2902.56	1.5596	2.36335	3.64391	4.5277
2901.13	0.60142	2901.13	2901.13	2901.13	2901.13	1.55821	2.36618	3.65636	4.53418
2899.7	0.59575	2899.7	2899.7	2899.7	2899.7	1.55639	2.36862	3.66788	4.53996
2898.28	0.58999	2898.28	2898.28	2898.28	2898.28	1.55414	2.37058	3.67828	4.54499
2896.85	0.58426	2896.85	2896.85	2896.85	2896.85	1.55154	2.37194	3.68739	4.5492
2895.42	0.57865	2895.42	2895.42	2895.42	2895.42	1.54859	2.37258	3.69504	4.55249
2893.99	0.57321	2893.99	2893.99	2893.99	2893.99	1.54527	2.37234	3.70085	4.55472
2892.57	0.56797	2892.57	2892.57	2892.57	2892.57	1.54149	2.37108	3.70441	4.55569
2891.14	0.56291	2891.14	2891.14	2891.14	2891.14	1.53718	2.36867	3.70534	4.55521
2889.71	0.55804	2889.71	2889.71	2889.71	2889.71	1.53228	2.365	3.70338	4.55315
2888.28	0.55334	2888.28	2888.28	2888.28	2888.28	1.52676	2.36007	3.69848	4.54941
2886.85	0.5489	2886.85	2886.85	2886.85	2886.85	1.52069	2.35397	3.69081	4.54407
2885.43	0.54481	2885.43	2885.43	2885.43	2885.43	1.51427	2.3469	3.68083	4.53732
2884	0.54127	2884	2884	2884	2884	1.50794	2.33923	3.66926	4.52959
2882.57	0.53846	2882.57	2882.57	2882.57	2882.57	1.50219	2.3314	3.65699	4.52145
2881.14	0.53657	2881.14	2881.14	2881.14	2881.14	1.49749	2.3239	3.64494	4.51351
2879.72	0.53577	2879.72	2879.72	2879.72	2879.72	1.49424	2.31722	3.63402	4.50641
2878.29	0.53626	2878.29	2878.29	2878.29	2878.29	1.49285	2.31184	3.62517	4.50079
2876.86	0.53819	2876.86	2876.86	2876.86	2876.86	1.49368	2.3082	3.61922	4.49722
2875.43	0.54168	2875.43	2875.43	2875.43	2875.43	1.49694	2.30668	3.61683	4.4961
2874.01	0.54672	2874.01	2874.01	2874.01	2874.01	1.50273	2.30757	3.61845	4.49765
2872.58	0.55329	2872.58	2872.58	2872.58	2872.58	1.51103	2.31104	3.62431	4.5019
2871.15	0.56133	2871.15	2871.15	2871.15	2871.15	1.52175	2.31716	3.6344	4.50879
2869.72	0.57083	2869.72	2869.72	2869.72	2869.72	1.53477	2.32591	3.64842	4.51808
2868.29	0.58178	2868.29	2868.29	2868.29	2868.29	1.54993	2.33719	3.66582	4.52949
2866.87	0.59415	2866.87	2866.87	2866.87	2866.87	1.567	2.35084	3.6858	4.54265
2865.44	0.60794	2865.44	2865.44	2865.44	2865.44	1.58567	2.36662	3.7075	4.55717
2864.01	0.62303	2864.01	2864.01	2864.01	2864.01	1.60558	2.3843	3.73009	4.57268
2862.58	0.63926	2862.58	2862.58	2862.58	2862.58	1.62633	2.40358	3.75281	4.58888
2861.16	0.65639	2861.16	2861.16	2861.16	2861.16	1.64746	2.42416	3.77499	4.60549
2859.73	0.67418	2859.73	2859.73	2859.73	2859.73	1.6686	2.44579	3.79611	4.62237
2858.3	0.69248	2858.3	2858.3	2858.3	2858.3	1.68957	2.46824	3.81587	4.63949
2856.87	0.71121	2856.87	2856.87	2856.87	2856.87	1.7104	2.49138	3.83426	4.657
2855.45	0.73027	2855.45	2855.45	2855.45	2855.45	1.73114	2.51509	3.8513	4.67504
2854.02	0.7495	2854.02	2854.02	2854.02	2854.02	1.75167	2.53924	3.86701	4.69368
2852.59	0.76861	2852.59	2852.59	2852.59	2852.59	1.77173	2.56362	3.88133	4.71285
2851.16	0.7873	2851.16	2851.16	2851.16	2851.16	1.79103	2.58801	3.89431	4.73242
2849.73	0.80528	2849.73	2849.73	2849.73	2849.73	1.80934	2.61218	3.90617	4.75225
2848.31	0.82225	2848.31	2848.31	2848.31	2848.31	1.82648	2.63589	3.91713	4.77211
2846.88	0.83792	2846.88	2846.88	2846.88	2846.88	1.84229	2.65889	3.92734	4.79172
2845.45	0.85208	2845.45	2845.45	2845.45	2845.45	1.8566	2.68094	3.93682	4.81073
2844.02	0.86462	2844.02	2844.02	2844.02	2844.02	1.86937	2.70186	3.94557	4.82881
2842.6	0.87558	2842.6	2842.6	2842.6	2842.6	1.88067	2.72152	3.95356	4.84567
2841.17	0.88506	2841.17	2841.17	2841.17	2841.17	1.89063	2.73979	3.9607	4.86108
2839.74	0.89323	2839.74	2839.74	2839.74	2839.74	1.89938	2.75662	3.96697	4.87486
2838.31	0.90025	2838.31	2838.31	2838.31	2838.31	1.90705	2.77198	3.97241	4.88695
2836.88	0.90628	2836.88	2836.88	2836.88	2836.88	1.91375	2.78588	3.97709	4.89736
2835.46	0.91144	2835.46	2835.46	2835.46	2835.46	1.91955	2.79834	3.98115	4.90617
2834.03	0.91582	2834.03	2834.03	2834.03	2834.03	1.9245	2.80941	3.98463	4.91352
2832.6	0.91956	2832.6	2832.6	2832.6	2832.6	1.92868	2.81916	3.98751	4.91959
2831.17	0.92276	2831.17	2831.17	2831.17	2831.17	1.93219	2.82764	3.98977	4.92456
2829.75	0.92554	2829.75	2829.75	2829.75	2829.75	1.93519	2.83498	3.99139	4.92864
2828.32	0.92799	2828.32	2828.32	2828.32	2828.32	1.93778	2.84127	3.99238	4.93197
2826.89	0.93015	2826.89	2826.89	2826.89	2826.89	1.94	2.84665	3.99279	4.93465
2825.46	0.93203	2825.46	2825.46	2825.46	2825.46	1.94185	2.85124	3.99265	4.93676
2824.04	0.93367	2824.04	2824.04	2824.04	2824.04	1.94331	2.85519	3.99204	4.93835
2822.61	0.93512	2822.61	2822.61	2822.61	2822.61	1.94446	2.85866	3.99115	4.93957
2821.18	0.93647	2821.18	2821.18	2821.18	2821.18	1.94547	2.8618	3.99018	4.94059
2819.75	0.93775	2819.75	2819.75	2819.75	2819.75	1.94643	2.86475	3.98922	4.94153
2818.32	0.93899	2818.32	2818.32	2818.32	2818.32	1.94738	2.86765	3.98833	4.94251
2816.9	0.94017	2816.9	2816.9	2816.9	2816.9	1.94835	2.87062	3.9875	4.94359
2815.47	0.94131	2815.47	2815.47	2815.47	2815.47	1.94938	2.87376	3.98683	4.94485
2814.04	0.94244	2814.04	2814.04	2814.04	2814.04	1.9505	2.87717	3.98639	4.94632
2812.61	0.94358	2812.61	2812.61	2812.61	2812.61	1.95174	2.88087	3.98624	4.948
2811.19	0.94476	2811.19	2811.19	2811.19	2811.19	1.95313	2.88487	3.9864	4.94988
2809.76	0.94608	2809.76	2809.76	2809.76	2809.76	1.95468	2.8892	3.98688	4.95195
2808.33	0.9476	2808.33	2808.33	2808.33	2808.33	1.95644	2.89384	3.98764	4.95422
2806.9	0.94937	2806.9	2806.9	2806.9	2806.9	1.95844	2.89878	3.98862	4.95667
2805.47	0.95139	2805.47	2805.47	2805.47	2805.47	1.96066	2.90398	3.98971	4.95929
2804.05	0.95365	2804.05	2804.05	2804.05	2804.05	1.96304	2.90936	3.99077	4.96199
2802.62	0.95608	2802.62	2802.62	2802.62	2802.62	1.96547	2.91482	3.99172	4.9647
2801.19	0.95867	2801.19	2801.19	2801.19	2801.19	1.9679	2.92027	3.99254	4.96736
2799.76	0.96143	2799.76	2799.76	2799.76	2799.76	1.97034	2.92565	3.99327	4.96997
2798.34	0.96435	2798.34	2798.34	2798.34	2798.34	1.97281	2.93094	3.99398	4.97253
2796.91	0.96741	2796.91	2796.91	2796.91	2796.91	1.97534	2.9361	3.99465	4.97504
2795.48	0.97053	2795.48	2795.48	2795.48	2795.48	1.97788	2.94112	3.99522	4.97747
2794.05	0.97361	2794.05	2794.05	2794.05	2794.05	1.9804	2.94593	3.99566	4.9798
2792.63	0.97656	2792.63	2792.63	2792.63	2792.63	1.98289	2.9505	3.996	4.98205
2791.2	0.97933	2791.2	2791.2	2791.2	2791.2	1.9853	2.95481	3.99622	4.98421
2789.77	0.98187	2789.77	2789.77	2789.77	2789.77	1.98755	2.95884	3.99643	4.98626
2788.34	0.98412	2788.34	2788.34	2788.34	2788.34	1.98951	2.96258	3.99662	4.98813
2786.91	0.9861	2786.91	2786.91	2786.91	2786.91	1.99116	2.96605	3.9968	4.98981
2785.49	0.98782	2785.49	2785.49	2785.49	2785.49	1.99249	2.96927	3.99696	4.99127
2784.06	0.98932	2784.06	2784.06	2784.06	2784.06	1.99356	2.97226	3.99706	4.99253
2782.63	0.99062	2782.63	2782.63	2782.63	2782.63	1.99443	2.97501	3.99706	4.99359
2781.2	0.99173	2781.2	2781.2	2781.2	2781.2	1.99515	2.97755	3.99692	4.99448
2779.78	0.99268	2779.78	2779.78	2779.78	2779.78	1.99577	2.97984	3.99666	4.9952
2778.35	0.99345	2778.35	2778.35	2778.35	2778.35	1.9963	2.9819	3.99633	4.99573
2776.92	0.99404	2776.92	2776.92	2776.92	2776.92	1.99667	2.98369	3.99594	4.99605
2775.49	0.99447	2775.49	2775.49	2775.49	2775.49	1.99684	2.9852	3.9955	4.99615
2774.06	0.99474	2774.06	2774.06	2774.06	2774.06	1.99677	2.98642	3.99501	4.99604
2772.64	0.99489	2772.64	2772.64	2772.64	2772.64	1.99655	2.98737	3.99446	4.99581
2771.21	0.99494	2771.21	2771.21	2771.21	2771.21	1.99626	2.98814	3.9939	4.99552
2769.78	0.99493	2769.78	2769.78	2769.78	2769.78	1.99598	2.98878	3.99333	4.99524
2768.35	0.99485	2768.35	2768.35	2768.35	2768.35	1.99576	2.98935	3.99278	4.99498
2766.93	0.99476	2766.93	2766.93	2766.93	2766.93	1.99562	2.9899	3.99232	4.99475
2765.5	0.99469	2765.5	2765.5	2765.5	2765.5	1.99558	2.99045	3.99206	4.9946
2764.07	0.99467	2764.07	2764.07	2764.07	2764.07	1.99566	2.99102	3.99201	4.99455
2762.64	0.99469	2762.64	2762.64	2762.64	2762.64	1.99578	2.99162	3.99218	4.99457
2761.22	0.99468	2761.22	2761.22	2761.22	2761.22	1.99585	2.99224	3.99249	4.9946
2759.79	0.99459	2759.79	2759.79	2759.79	2759.79	1.99581	2.99285	3.99281	4.99462
2758.36	0.99442	2758.36	2758.36	2758.36	2758.36	1.99566	2.99344	3.9931	4.99461
2756.93	0.99416	2756.93	2756.93	2756.93	2756.93	1.99543	2.99398	3.9934	4.99458
2755.5	0.99379	2755.5	2755.5	2755.5	2755.5	1.99512	2.99439	3.99371	4.99452
2754.08	0.99331	2754.08	2754.08	2754.08	2754.08	1.99468	2.99457	3.99405	4.99436
2752.65	0.99268	2752.65	2752.65	2752.65	2752.65	1.99412	2.99443	3.9944	4.99405
2751.22	0.99191	2751.22	2751.22	2751.22	2751.22	1.99343	2.99393	3.99475	4.99354
2749.79	0.99098	2749.79	2749.79	2749.79	2749.79	1.9926	2.99304	3.99499	4.99282
2748.37	0.98994	2748.37	2748.37	2748.37	2748.37	1.99161	2.99176	3.99502	4.9919
2746.94	0.98886	2746.94	2746.94	2746.94	2746.94	1.99049	2.99012	3.99471	4.99079
2745.51	0.98782	2745.51	2745.51	2745.51	2745.51	1.9893	2.98817	3.99407	4.98958
2744.08	0.98693	2744.08	2744.08	2744.08	2744.08	1.9881	2.98603	3.99315	4.98833
2742.65	0.98629	2742.65	2742.65	2742.65	2742.65	1.98698	2.98383	3.99211	4.98711
2741.23	0.9859	2741.23	2741.23	2741.23	2741.23	1.986	2.98168	3.99106	4.98595
2739.8	0.98577	2739.8	2739.8	2739.8	2739.8	1.98516	2.97965	3.99011	4.98486
2738.37	0.98586	2738.37	2738.37	2738.37	2738.37	1.98446	2.97781	3.98925	4.98385
2736.94	0.98613	2736.94	2736.94	2736.94	2736.94	1.98393	2.97616	3.98842	4.98291
2735.52	0.98654	2735.52	2735.52	2735.52	2735.52	1.98354	2.97471	3.98753	4.98204
2734.09	0.98705	2734.09	2734.09	2734.09	2734.09	1.98325	2.97346	3.98657	4.98123
2732.66	0.98765	2732.66	2732.66	2732.66	2732.66	1.98302	2.97241	3.98551	4.98047
2731.23	0.98829	2731.23	2731.23	2731.23	2731.23	1.98286	2.97157	3.98449	4.9798
2729.81	0.98892	2729.81	2729.81	2729.81	2729.81	1.98276	2.97091	3.98364	4.97925
2728.38	0.98945	2728.38	2728.38	2728.38	2728.38	1.9827	2.97042	3.98306	4.97881
2726.95	0.98984	2726.95	2726.95	2726.95	2726.95	1.98267	2.97006	3.98279	4.9785
2725.52	0.99007	2725.52	2725.52	2725.52	2725.52	1.98265	2.96982	3.98278	4.97831
2724.09	0.99015	2724.09	2724.09	2724.09	2724.09	1.98265	2.96969	3.98289	4.97825
2722.67	0.99009	2722.67	2722.67	2722.67	2722.67	1.98268	2.96966	3.98305	4.97831
2721.24	0.98993	2721.24	2721.24	2721.24	2721.24	1.98276	2.96975	3.98314	4.97849
2719.81	0.98973	2719.81	2719.81	2719.81	2719.81	1.98291	2.96996	3.98323	4.97881
2718.38	0.98953	2718.38	2718.38	2718.38	2718.38	1.98316	2.97032	3.98338	4.97928
2716.96	0.98936	2716.96	2716.96	2716.96	2716.96	1.98352	2.97084	3.98373	4.97991
2715.53	0.98924	2715.53	2715.53	2715.53	2715.53	1.98396	2.97155	3.98435	4.98069
2714.1	0.98918	2714.1	2714.1	2714.1	2714.1	1.98446	2.97242	3.98521	4.98158
2712.67	0.98916	2712.67	2712.67	2712.67	2712.67	1.98495	2.97342	3.98619	4.98249
2711.25	0.98913	2711.25	2711.25	2711.25	2711.25	1.98539	2.97447	3.98715	4.98336
2709.82	0.98903	2709.82	2709.82	2709.82	2709.82	1.98577	2.97549	3.98796	4.98412
2708.39	0.98875	2708.39	2708.39	2708.39	2708.39	1.98605	2.97637	3.98861	4.98471
2706.96	0.98827	2706.96	2706.96	2706.96	2706.96	1.98623	2.97707	3.98913	4.9851
2705.53	0.98761	2705.53	2705.53	2705.53	2705.53	1.98631	2.97757	3.98961	4.98531
2704.11	0.98686	2704.11	2704.11	2704.11	2704.11	1.98631	2.97792	3.99013	4.98539
2702.68	0.98611	2702.68	2702.68	2702.68	2702.68	1.98625	2.97816	3.99068	4.98542
2701.25	0.98547	2701.25	2701.25	2701.25	2701.25	1.98617	2.97835	3.99119	4.98545
2699.82	0.98499	2699.82	2699.82	2699.82	2699.82	1.98609	2.97857	3.99164	4.98553
2698.4	0.98473	2698.4	2698.4	2698.4	2698.4	1.98607	2.97888	3.99193	4.98572
2696.97	0.98469	2696.97	2696.97	2696.97	2696.97	1.98616	2.97932	3.99208	4.98604
2695.54	0.98487	2695.54	2695.54	2695.54	2695.54	1.98639	2.97993	3.99209	4.98648
2694.11	0.98524	2694.11	2694.11	2694.11	2694.11	1.98678	2.9807	3.99201	4.98703
2692.68	0.98573	2692.68	2692.68	2692.68	2692.68	1.98727	2.98158	3.99189	4.98764
2691.26	0.98634	2691.26	2691.26	2691.26	2691.26	1.98787	2.98257	3.99182	4.98829
2689.83	0.98706	2689.83	2689.83	2689.83	2689.83	1.98854	2.98368	3.99178	4.98898
2688.4	0.9879	2688.4	2688.4	2688.4	2688.4	1.98924	2.98488	3.99175	4.98968
2686.97	0.98881	2686.97	2686.97	2686.97	2686.97	1.98995	2.98616	3.9917	4.99038
2685.55	0.98974	2685.55	2685.55	2685.55	2685.55	1.99063	2.98749	3.99159	4.99105
2684.12	0.99063	2684.12	2684.12	2684.12	2684.12	1.99127	2.9888	3.99143	4.99168
2682.69	0.99137	2682.69	2682.69	2682.69	2682.69	1.99186	2.99001	3.99126	4.99223
2681.26	0.99192	2681.26	2681.26	2681.26	2681.26	1.99239	2.99104	3.99112	4.99266
2679.84	0.99228	2679.84	2679.84	2679.84	2679.84	1.99286	2.99187	3.99108	4.99299
2678.41	0.99249	2678.41	2678.41	2678.41	2678.41	1.99329	2.99252	3.99116	4.99323
2676.98	0.99264	2676.98	2676.98	2676.98	2676.98	1.9937	2.99302	3.99134	4.99342
2675.55	0.99278	2675.55	2675.55	2675.55	2675.55	1.99408	2.99339	3.99155	4.9936
2674.12	0.99292	2674.12	2674.12	2674.12	2674.12	1.99444	2.99365	3.9917	4.99379
2672.7	0.99309	2672.7	2672.7	2672.7	2672.7	1.99475	2.99382	3.99181	4.99399
2671.27	0.99328	2671.27	2671.27	2671.27	2671.27	1.99503	2.99393	3.9919	4.9942
2669.84	0.99349	2669.84	2669.84	2669.84	2669.84	1.9953	2.99401	3.99204	4.99441
2668.41	0.99372	2668.41	2668.41	2668.41	2668.41	1.99553	2.99408	3.99223	4.9946
2666.99	0.99395	2666.99	2666.99	2666.99	2666.99	1.99573	2.99411	3.99245	4.99472
2665.56	0.99413	2665.56	2665.56	2665.56	2665.56	1.9959	2.99412	3.99269	4.9948
2664.13	0.99424	2664.13	2664.13	2664.13	2664.13	1.99607	2.99407	3.99295	4.99481
2662.7	0.9943	2662.7	2662.7	2662.7	2662.7	1.99624	2.99403	3.99324	4.9948
2661.27	0.99431	2661.27	2661.27	2661.27	2661.27	1.99644	2.99399	3.99356	4.99477
2659.85	0.99428	2659.85	2659.85	2659.85	2659.85	1.99665	2.994	3.99393	4.99474
2658.42	0.99422	2658.42	2658.42	2658.42	2658.42	1.99682	2.99403	3.99433	4.99471
2656.99	0.99416	2656.99	2656.99	2656.99	2656.99	1.99694	2.99407	3.99476	4.99469
2655.56	0.99413	2655.56	2655.56	2655.56	2655.56	1.99699	2.9941	3.99519	4.99467
2654.14	0.99413	2654.14	2654.14	2654.14	2654.14	1.99701	2.99412	3.9956	4.99465
2652.71	0.99416	2652.71	2652.71	2652.71	2652.71	1.99705	2.99413	3.996	4.99466
2651.28	0.9942	2651.28	2651.28	2651.28	2651.28	1.99713	2.99415	3.99637	4.99469
2649.85	0.99422	2649.85	2649.85	2649.85	2649.85	1.99723	2.99418	3.99671	4.99475
2648.43	0.99421	2648.43	2648.43	2648.43	2648.43	1.99737	2.99423	3.99699	4.99481
2647	0.9942	2647	2647	2647	2647	1.9975	2.99426	3.9972	4.99486
2645.57	0.9942	2645.57	2645.57	2645.57	2645.57	1.99762	2.99424	3.99737	4.99487
2644.14	0.99422	2644.14	2644.14	2644.14	2644.14	1.99768	2.99416	3.99749	4.99483
2642.71	0.99423	2642.71	2642.71	2642.71	2642.71	1.99765	2.99403	3.99752	4.99473
2641.29	0.99422	2641.29	2641.29	2641.29	2641.29	1.99753	2.99387	3.99747	4.99457
2639.86	0.99416	2639.86	2639.86	2639.86	2639.86	1.99733	2.99369	3.9973	4.99434
2638.43	0.99408	2638.43	2638.43	2638.43	2638.43	1.99708	2.99348	3.99706	4.99405
2637	0.99396	2637	2637	2637	2637	1.99685	2.99322	3.9968	4.9937
2635.58	0.99387	2635.58	2635.58	2635.58	2635.58	1.99666	2.99289	3.99656	4.99332
2634.15	0.99379	2634.15	2634.15	2634.15	2634.15	1.99652	2.99249	3.99632	4.99292
2632.72	0.99375	2632.72	2632.72	2632.72	2632.72	1.99642	2.99203	3.99605	4.99251
2631.29	0.99373	2631.29	2631.29	2631.29	2631.29	1.99633	2.99152	3.99572	4.99209
2629.86	0.99369	2629.86	2629.86	2629.86	2629.86	1.99617	2.99098	3.99528	4.99169
2628.44	0.99365	2628.44	2628.44	2628.44	2628.44	1.99595	2.9904	3.99476	4.99131
2627.01	0.99358	2627.01	2627.01	2627.01	2627.01	1.99567	2.9898	3.99415	4.99097
2625.58	0.9935	2625.58	2625.58	2625.58	2625.58	1.99534	2.98917	3.99356	4.99066
2624.15	0.99342	2624.15	2624.15	2624.15	2624.15	1.99502	2.98854	3.99302	4.9904
2622.73	0.99334	2622.73	2622.73	2622.73	2622.73	1.99473	2.98793	3.99259	4.99019
2621.3	0.99326	2621.3	2621.3	2621.3	2621.3	1.99449	2.9874	3.99224	4.99
2619.87	0.99319	2619.87	2619.87	2619.87	2619.87	1.99435	2.98696	3.99197	4.98985
2618.44	0.99309	2618.44	2618.44	2618.44	2618.44	1.99432	2.98662	3.99176	4.98973
2617.02	0.99299	2617.02	2617.02	2617.02	2617.02	1.99437	2.98636	3.9916	4.98965
2615.59	0.99288	2615.59	2615.59	2615.59	2615.59	1.99446	2.9862	3.99148	4.9896
2614.16	0.99277	2614.16	2614.16	2614.16	2614.16	1.99453	2.98614	3.99144	4.98958
2612.73	0.99268	2612.73	2612.73	2612.73	2612.73	1.99457	2.98622	3.99153	4.98959
2611.3	0.99264	2611.3	2611.3	2611.3	2611.3	1.99459	2.98646	3.99179	4.98965
2609.88	0.99264	2609.88	2609.88	2609.88	2609.88	1.9946	2.98681	3.99217	4.98977
2608.45	0.99268	2608.45	2608.45	2608.45	2608.45	1.99466	2.98725	3.99265	4.98994
2607.02	0.99272	2607.02	2607.02	2607.02	2607.02	1.99477	2.98774	3.99313	4.99017
2605.59	0.99278	2605.59	2605.59	2605.59	2605.59	1.99494	2.98826	3.99358	4.99046
2604.17	0.99282	2604.17	2604.17	2604.17	2604.17	1.99516	2.98882	3.99397	4.9908
2602.74	0.99285	2602.74	2602.74	2602.74	2602.74	1.99539	2.98941	3.99428	4.99117
2601.31	0.99286	2601.31	2601.31	2601.31	2601.31	1.99559	2.98998	3.99452	4.99157
2599.88	0.99287	2599.88	2599.88	2599.88	2599.88	1.99573	2.99051	3.99471	4.99197
2598.45	0.99287	2598.45	2598.45	2598.45	2598.45	1.99577	2.99096	3.9949	4.99235
2597.03	0.99286	2597.03	2597.03	2597.03	2597.03	1.99573	2.99131	3.99508	4.9927
2595.6	0.99283	2595.6	2595.6	2595.6	2595.6	1.99562	2.99158	3.99523	4.99299
2594.17	0.99278	2594.17	2594.17	2594.17	2594.17	1.99548	2.99178	3.99534	4.99322
2592.74	0.9927	2592.74	2592.74	2592.74	2592.74	1.99536	2.99194	3.99537	4.99336
2591.32	0.99263	2591.32	2591.32	2591.32	2591.32	1.9953	2.99206	3.99534	4.99344
2589.89	0.99258	2589.89	2589.89	2589.89	2589.89	1.9953	2.99211	3.99524	4.99343
2588.46	0.99254	2588.46	2588.46	2588.46	2588.46	1.99533	2.9921	3.99512	4.99336
2587.03	0.99253	2587.03	2587.03	2587.03	2587.03	1.99536	2.99203	3.99502	4.99324
2585.61	0.99254	2585.61	2585.61	2585.61	2585.61	1.99534	2.99193	3.99497	4.99309
2584.18	0.99255	2584.18	2584.18	2584.18	2584.18	1.99527	2.99184	3.99499	4.99295
2582.75	0.99254	2582.75	2582.75	2582.75	2582.75	1.99513	2.99175	3.99503	4.99279
2581.32	0.99251	2581.32	2581.32	2581.32	2581.32	1.99495	2.99167	3.99503	4.99265
2579.89	0.99244	2579.89	2579.89	2579.89	2579.89	1.99475	2.99158	3.99497	4.99253
2578.47	0.99237	2578.47	2578.47	2578.47	2578.47	1.99459	2.99148	3.99487	4.99244
2577.04	0.99229	2577.04	2577.04	2577.04	2577.04	1.99448	2.99139	3.99475	4.99238
2575.61	0.99222	2575.61	2575.61	2575.61	2575.61	1.99442	2.99133	3.99464	4.99235
2574.18	0.99214	2574.18	2574.18	2574.18	2574.18	1.99441	2.99129	3.99455	4.99233
2572.76	0.99204	2572.76	2572.76	2572.76	2572.76	1.99442	2.99127	3.99451	4.99233
2571.33	0.99194	2571.33	2571.33	2571.33	2571.33	1.99442	2.99125	3.99449	4.99234
2569.9	0.99184	2569.9	2569.9	2569.9	2569.9	1.99438	2.99121	3.99448	4.99233
2568.47	0.99176	2568.47	2568.47	2568.47	2568.47	1.99429	2.99115	3.99443	4.9923
2567.05	0.99171	2567.05	2567.05	2567.05	2567.05	1.99418	2.99107	3.99436	4.99223
2565.62	0.99169	2565.62	2565.62	2565.62	2565.62	1.99407	2.991	3.99425	4.99213
2564.19	0.99174	2564.19	2564.19	2564.19	2564.19	1.99401	2.99093	3.99412	4.99202
2562.76	0.99183	2562.76	2562.76	2562.76	2562.76	1.99401	2.99088	3.99399	4.9919
2561.33	0.99192	2561.33	2561.33	2561.33	2561.33	1.99409	2.99081	3.99387	4.9918
2559.91	0.99201	2559.91	2559.91	2559.91	2559.91	1.99423	2.99074	3.9938	4.99172
2558.48	0.99207	2558.48	2558.48	2558.48	2558.48	1.9944	2.99068	3.99379	4.99171
2557.05	0.99212	2557.05	2557.05	2557.05	2557.05	1.99457	2.99065	3.99381	4.99176
2555.62	0.99214	2555.62	2555.62	2555.62	2555.62	1.99471	2.99066	3.99383	4.99188
2554.2	0.99217	2554.2	2554.2	2554.2	2554.2	1.99481	2.99071	3.99385	4.99206
2552.77	0.99222	2552.77	2552.77	2552.77	2552.77	1.99488	2.99081	3.99387	4.99232
2551.34	0.9923	2551.34	2551.34	2551.34	2551.34	1.99495	2.99094	3.99394	4.99264
2549.91	0.99239	2549.91	2549.91	2549.91	2549.91	1.99504	2.9911	3.99405	4.99299
2548.48	0.99248	2548.48	2548.48	2548.48	2548.48	1.99516	2.99128	3.99422	4.99335
2547.06	0.99257	2547.06	2547.06	2547.06	2547.06	1.99534	2.9915	3.9945	4.99371
2545.63	0.99266	2545.63	2545.63	2545.63	2545.63	1.99557	2.99176	3.99485	4.99403
2544.2	0.99275	2544.2	2544.2	2544.2	2544.2	1.99582	2.99204	3.99525	4.99428
2542.77	0.99288	2542.77	2542.77	2542.77	2542.77	1.99606	2.99232	3.99562	4.99446
2541.35	0.99303	2541.35	2541.35	2541.35	2541.35	1.99626	2.99256	3.99593	4.99457
2539.92	0.9932	2539.92	2539.92	2539.92	2539.92	1.99641	2.99279	3.99618	4.99461
2538.49	0.99337	2538.49	2538.49	2538.49	2538.49	1.99654	2.993	3.99638	4.9946
2537.06	0.99353	2537.06	2537.06	2537.06	2537.06	1.99664	2.9932	3.9966	4.99457
2535.64	0.99363	2535.64	2535.64	2535.64	2535.64	1.99673	2.99338	3.99681	4.99453
2534.21	0.99367	2534.21	2534.21	2534.21	2534.21	1.99681	2.99349	3.99702	4.99448
2532.78	0.99367	2532.78	2532.78	2532.78	2532.78	1.99689	2.99352	3.99719	4.99443
2531.35	0.99363	2531.35	2531.35	2531.35	2531.35	1.99695	2.99344	3.99728	4.99437
2529.92	0.99357	2529.92	2529.92	2529.92	2529.92	1.99697	2.99324	3.99724	4.99429
2528.5	0.99349	2528.5	2528.5	2528.5	2528.5	1.99692	2.99291	3.99705	4.99419
2527.07	0.9934	2527.07	2527.07	2527.07	2527.07	1.9968	2.99246	3.99673	4.99404
2525.64	0.99328	2525.64	2525.64	2525.64	2525.64	1.99658	2.99189	3.99631	4.99383
2524.21	0.99315	2524.21	2524.21	2524.21	2524.21	1.99627	2.9912	3.99587	4.99354
2522.79	0.993	2522.79	2522.79	2522.79	2522.79	1.9959	2.99042	3.99542	4.99318
2521.36	0.99286	2521.36	2521.36	2521.36	2521.36	1.99552	2.98959	3.99503	4.99274
2519.93	0.99275	2519.93	2519.93	2519.93	2519.93	1.99518	2.98879	3.9947	4.99226
2518.5	0.9927	2518.5	2518.5	2518.5	2518.5	1.9949	2.98807	3.99443	4.99177
2517.07	0.99267	2517.07	2517.07	2517.07	2517.07	1.99472	2.98746	3.9942	4.9913
2515.65	0.99266	2515.65	2515.65	2515.65	2515.65	1.99463	2.98699	3.99398	4.99086
2514.22	0.99265	2514.22	2514.22	2514.22	2514.22	1.99461	2.98665	3.99379	4.99051
2512.79	0.99263	2512.79	2512.79	2512.79	2512.79	1.99465	2.98646	3.99367	4.99024
2511.36	0.99262	2511.36	2511.36	2511.36	2511.36	1.99471	2.9864	3.99367	4.9901
2509.94	0.9926	2509.94	2509.94	2509.94	2509.94	1.99477	2.98647	3.99379	4.99006
2508.51	0.99261	2508.51	2508.51	2508.51	2508.51	1.99481	2.98661	3.99397	4.99012
2507.08	0.99264	2507.08	2507.08	2507.08	2507.08	1.99484	2.98678	3.99418	4.99027
2505.65	0.99267	2505.65	2505.65	2505.65	2505.65	1.99487	2.98695	3.99433	4.99046
2504.23	0.9927	2504.23	2504.23	2504.23	2504.23	1.9949	2.98706	3.99439	4.99067
2502.8	0.9927	2502.8	2502.8	2502.8	2502.8	1.99494	2.98712	3.99433	4.99086
2501.37	0.99267	2501.37	2501.37	2501.37	2501.37	1.99498	2.98713	3.99418	4.991
2499.94	0.99263	2499.94	2499.94	2499.94	2499.94	1.99502	2.98709	3.99401	4.99107
2498.51	0.9926	2498.51	2498.51	2498.51	2498.51	1.99502	2.987	3.9939	4.99105
2497.09	0.99259	2497.09	2497.09	2497.09	2497.09	1.99498	2.98685	3.99382	4.99095
2495.66	0.99258	2495.66	2495.66	2495.66	2495.66	1.9949	2.98666	3.99378	4.99078
2494.23	0.99257	2494.23	2494.23	2494.23	2494.23	1.9948	2.98646	3.99375	4.99055
2492.8	0.99253	2492.8	2492.8	2492.8	2492.8	1.99471	2.98631	3.99371	4.99031
2491.38	0.99245	2491.38	2491.38	2491.38	2491.38	1.99468	2.98624	3.99367	4.99009
2489.95	0.99233	2489.95	2489.95	2489.95	2489.95	1.99471	2.98626	3.99361	4.98991
2488.52	0.99221	2488.52	2488.52	2488.52	2488.52	1.9948	2.98633	3.99356	4.9898
2487.09	0.99211	2487.09	2487.09	2487.09	2487.09	1.99496	2.98644	3.99358	4.98977
2485.66	0.99205	2485.66	2485.66	2485.66	2485.66	1.99514	2.9866	3.99367	4.98983
2484.24	0.99202	2484.24	2484.24	2484.24	2484.24	1.9953	2.98677	3.9938	4.98995
2482.81	0.99198	2482.81	2482.81	2482.81	2482.81	1.99541	2.98695	3.99391	4.99014
2481.38	0.99193	2481.38	2481.38	2481.38	2481.38	1.99546	2.98714	3.99396	4.99035
2479.95	0.99188	2479.95	2479.95	2479.95	2479.95	1.99547	2.98734	3.99396	4.99058
2478.53	0.99183	2478.53	2478.53	2478.53	2478.53	1.99547	2.98753	3.99392	4.99081
2477.1	0.9918	2477.1	2477.1	2477.1	2477.1	1.99546	2.9877	3.99386	4.991
2475.67	0.9918	2475.67	2475.67	2475.67	2475.67	1.99547	2.98787	3.99381	4.99115
2474.24	0.99183	2474.24	2474.24	2474.24	2474.24	1.99552	2.98806	3.99382	4.99126
2472.82	0.99187	2472.82	2472.82	2472.82	2472.82	1.99559	2.98829	3.99393	4.99133
2471.39	0.99189	2471.39	2471.39	2471.39	2471.39	1.99567	2.98857	3.99409	4.99135
2469.96	0.99185	2469.96	2469.96	2469.96	2469.96	1.99574	2.98886	3.99426	4.99135
2468.53	0.99176	2468.53	2468.53	2468.53	2468.53	1.99577	2.98915	3.99438	4.99132
2467.1	0.99165	2467.1	2467.1	2467.1	2467.1	1.99579	2.98943	3.99445	4.99131
2465.68	0.99155	2465.68	2465.68	2465.68	2465.68	1.9958	2.98973	3.99448	4.99131
2464.25	0.99147	2464.25	2464.25	2464.25	2464.25	1.99581	2.99004	3.99449	4.99133
2462.82	0.99142	2462.82	2462.82	2462.82	2462.82	1.99583	2.99034	3.99451	4.99137
2461.39	0.99138	2461.39	2461.39	2461.39	2461.39	1.99585	2.99064	3.99457	4.99145
2459.97	0.99134	2459.97	2459.97	2459.97	2459.97	1.9959	2.9909	3.99466	4.99157
2458.54	0.99131	2458.54	2458.54	2458.54	2458.54	1.99595	2.99109	3.99474	4.99172
2457.11	0.99126	2457.11	2457.11	2457.11	2457.11	1.99598	2.99121	3.99474	4.99187
2455.68	0.99121	2455.68	2455.68	2455.68	2455.68	1.99596	2.99127	3.99465	4.99199
2454.25	0.99117	2454.25	2454.25	2454.25	2454.25	1.99591	2.99132	3.99449	4.9921
2452.83	0.99118	2452.83	2452.83	2452.83	2452.83	1.99584	2.99136	3.99433	4.99218
2451.4	0.99122	2451.4	2451.4	2451.4	2451.4	1.99577	2.99139	3.99421	4.99222
2449.97	0.99125	2449.97	2449.97	2449.97	2449.97	1.9957	2.99138	3.99417	4.99222
2448.54	0.99125	2448.54	2448.54	2448.54	2448.54	1.99564	2.99131	3.99418	4.99219
2447.12	0.99121	2447.12	2447.12	2447.12	2447.12	1.99563	2.99123	3.99421	4.99214
2445.69	0.99115	2445.69	2445.69	2445.69	2445.69	1.99566	2.99116	3.99421	4.9921
2444.26	0.99108	2444.26	2444.26	2444.26	2444.26	1.99571	2.99112	3.99417	4.99207
2442.83	0.99104	2442.83	2442.83	2442.83	2442.83	1.99576	2.99112	3.99405	4.99207
2441.41	0.99105	2441.41	2441.41	2441.41	2441.41	1.99578	2.99113	3.9939	4.99212
2439.98	0.99111	2439.98	2439.98	2439.98	2439.98	1.9958	2.99114	3.99377	4.99222
2438.55	0.99119	2438.55	2438.55	2438.55	2438.55	1.9958	2.99113	3.9937	4.99236
2437.12	0.99127	2437.12	2437.12	2437.12	2437.12	1.99579	2.99113	3.99371	4.99252
2435.69	0.99133	2435.69	2435.69	2435.69	2435.69	1.99578	2.99115	3.99377	4.99269
2434.27	0.99139	2434.27	2434.27	2434.27	2434.27	1.99579	2.99121	3.99382	4.99285
2432.84	0.9915	2432.84	2432.84	2432.84	2432.84	1.99581	2.9913	3.99384	4.99299
2431.41	0.99164	2431.41	2431.41	2431.41	2431.41	1.99586	2.99139	3.99379	4.99308
2429.98	0.99181	2429.98	2429.98	2429.98	2429.98	1.9959	2.99144	3.99365	4.99313
2428.56	0.99197	2428.56	2428.56	2428.56	2428.56	1.99592	2.99144	3.9935	4.99311
2427.13	0.99208	2427.13	2427.13	2427.13	2427.13	1.9959	2.99143	3.99338	4.99304
2425.7	0.99213	2425.7	2425.7	2425.7	2425.7	1.99584	2.99142	3.99331	4.99294
2424.27	0.99212	2424.27	2424.27	2424.27	2424.27	1.99571	2.99142	3.99329	4.9928
2422.85	0.99207	2422.85	2422.85	2422.85	2422.85	1.99553	2.99141	3.99327	4.99266
2421.42	0.99203	2421.42	2421.42	2421.42	2421.42	1.99533	2.99136	3.9932	4.99252
2419.99	0.99202	2419.99	2419.99	2419.99	2419.99	1.99515	2.99125	3.99303	4.99242
2418.56	0.99202	2418.56	2418.56	2418.56	2418.56	1.995	2.99111	3.99276	4.99234
2417.13	0.99201	2417.13	2417.13	2417.13	2417.13	1.99486	2.99096	3.99239	4.9923
2415.71	0.99198	2415.71	2415.71	2415.71	2415.71	1.99473	2.99082	3.99198	4.99228
2414.28	0.99192	2414.28	2414.28	2414.28	2414.28	1.99459	2.99071	3.99162	4.99229
2412.85	0.99187	2412.85	2412.85	2412.85	2412.85	1.99444	2.99058	3.99134	4.9923
2411.42	0.99182	2411.42	2411.42	2411.42	2411.42	1.99424	2.9904	3.99112	4.99229
2410	0.99182	2410	2410	2410	2410	1.99426	2.99041	3.99114	4.99227
2408.57	0.99181	2408.57	2408.57	2408.57	2408.57	1.99427	2.99042	3.99116	4.99226
2407.14	0.99181	2407.14	2407.14	2407.14	2407.14	1.99429	2.99042	3.99118	4.99224
2405.71	0.99181	2405.71	2405.71	2405.71	2405.71	1.9943	2.99042	3.9912	4.99223
2404.28	0.99181	2404.28	2404.28	2404.28	2404.28	1.99431	2.99043	3.99123	4.99221
2402.86	0.99181	2402.86	2402.86	2402.86	2402.86	1.99433	2.99044	3.99125	4.99219
2401.43	0.9918	2401.43	2401.43	2401.43	2401.43	1.99434	2.99044	3.99127	4.99218
2400	0.9918	2400	2400	2400	2400	1.99436	2.99045	3.99129	4.99216
2398.57	0.9918	2398.57	2398.57	2398.57	2398.57	1.99437	2.99046	3.99131	4.99215
2397.15	0.9918	2397.15	2397.15	2397.15	2397.15	1.99439	2.99046	3.99133	4.99213
2395.72	0.99179	2395.72	2395.72	2395.72	2395.72	1.9944	2.99047	3.99136	4.99212
2394.29	0.99179	2394.29	2394.29	2394.29	2394.29	1.99441	2.99047	3.99138	4.9921
2392.86	0.99179	2392.86	2392.86	2392.86	2392.86	1.99443	2.99048	3.9914	4.99209
2391.44	0.99179	2391.44	2391.44	2391.44	2391.44	1.99444	2.99049	3.99142	4.99207
2390.01	0.99178	2390.01	2390.01	2390.01	2390.01	1.99446	2.99049	3.99144	4.99206
2388.58	0.99178	2388.58	2388.58	2388.58	2388.58	1.99447	2.9905	3.99146	4.99204
2387.15	0.99178	2387.15	2387.15	2387.15	2387.15	1.99449	2.99051	3.99148	4.99203
2385.72	0.99177	2385.72	2385.72	2385.72	2385.72	1.9945	2.99051	3.99151	4.99201
2384.3	0.99177	2384.3	2384.3	2384.3	2384.3	1.99451	2.99052	3.99153	4.992
2382.87	0.99177	2382.87	2382.87	2382.87	2382.87	1.99453	2.99052	3.99155	4.99198
2381.44	0.99177	2381.44	2381.44	2381.44	2381.44	1.99454	2.99053	3.99157	4.99197
2380.01	0.99176	2380.01	2380.01	2380.01	2380.01	1.99456	2.99054	3.99159	4.99195
2378.59	0.99176	2378.59	2378.59	2378.59	2378.59	1.99457	2.99054	3.99161	4.99194
2377.16	0.99176	2377.16	2377.16	2377.16	2377.16	1.99459	2.99055	3.99164	4.99192
2375.73	0.99176	2375.73	2375.73	2375.73	2375.73	1.9946	2.99056	3.99166	4.9919
2374.3	0.99176	2374.3	2374.3	2374.3	2374.3	1.99462	2.99056	3.99168	4.99189
2372.87	0.99175	2372.87	2372.87	2372.87	2372.87	1.99463	2.99056	3.9917	4.99188
2371.45	0.99175	2371.45	2371.45	2371.45	2371.45	1.99465	2.99057	3.99172	4.99186
2370.02	0.99175	2370.02	2370.02	2370.02	2370.02	1.99466	2.99058	3.99174	4.99185
2368.59	0.99175	2368.59	2368.59	2368.59	2368.59	1.99468	2.99058	3.99176	4.99183
2367.16	0.99174	2367.16	2367.16	2367.16	2367.16	1.99469	2.99059	3.99179	4.99181
2365.74	0.99174	2365.74	2365.74	2365.74	2365.74	1.99471	2.9906	3.99181	4.9918
2364.31	0.99173	2364.31	2364.31	2364.31	2364.31	1.99472	2.9906	3.99183	4.99178
2362.88	0.99173	2362.88	2362.88	2362.88	2362.88	1.99474	2.99061	3.99185	4.99177
2361.45	0.99173	2361.45	2361.45	2361.45	2361.45	1.99475	2.99061	3.99187	4.99175
2360.03	0.99173	2360.03	2360.03	2360.03	2360.03	1.99477	2.99062	3.99189	4.99174
2358.6	0.99173	2358.6	2358.6	2358.6	2358.6	1.99478	2.99063	3.99193	4.99172
2357.17	0.99172	2357.17	2357.17	2357.17	2357.17	1.99479	2.99063	3.99195	4.99171
2355.74	0.99172	2355.74	2355.74	2355.74	2355.74	1.99481	2.99064	3.99197	4.99169
2354.31	0.99172	2354.31	2354.31	2354.31	2354.31	1.99482	2.99065	3.99199	4.99168
2352.89	0.99172	2352.89	2352.89	2352.89	2352.89	1.99484	2.99065	3.99201	4.99166
2351.46	0.99171	2351.46	2351.46	2351.46	2351.46	1.99485	2.99066	3.99203	4.99165
2350.03	0.99171	2350.03	2350.03	2350.03	2350.03	1.99487	2.99066	3.99206	4.99163
2348.6	0.99171	2348.6	2348.6	2348.6	2348.6	1.99488	2.99067	3.99208	4.99162
2347.18	0.99171	2347.18	2347.18	2347.18	2347.18	1.99489	2.99068	3.9921	4.9916
2345.75	0.9917	2345.75	2345.75	2345.75	2345.75	1.99491	2.99068	3.99212	4.99159
2344.32	0.9917	2344.32	2344.32	2344.32	2344.32	1.99492	2.99069	3.99214	4.99157
2342.89	0.9917	2342.89	2342.89	2342.89	2342.89	1.99494	2.9907	3.99216	4.99155
2341.46	0.99169	2341.46	2341.46	2341.46	2341.46	1.99495	2.9907	3.99218	4.99154
2340.04	0.99169	2340.04	2340.04	2340.04	2340.04	1.99497	2.9907	3.99221	4.99152
2338.61	0.99169	2338.61	2338.61	2338.61	2338.61	1.99498	2.99071	3.99223	4.99151
2337.18	0.99169	2337.18	2337.18	2337.18	2337.18	1.99499	2.99072	3.99225	4.99149
2335.75	0.99168	2335.75	2335.75	2335.75	2335.75	1.99501	2.99072	3.99227	4.99148
2334.33	0.99168	2334.33	2334.33	2334.33	2334.33	1.99502	2.99073	3.99229	4.99147
2332.9	0.99168	2332.9	2332.9	2332.9	2332.9	1.99504	2.99074	3.99231	4.99145
2331.47	0.99168	2331.47	2331.47	2331.47	2331.47	1.99505	2.99074	3.99234	4.99143
2330.04	0.99168	2330.04	2330.04	2330.04	2330.04	1.99507	2.99075	3.99236	4.99142
2328.62	0.99167	2328.62	2328.62	2328.62	2328.62	1.99508	2.99075	3.99238	4.9914
2327.19	0.99167	2327.19	2327.19	2327.19	2327.19	1.99509	2.99076	3.9924	4.99139
2325.76	0.99167	2325.76	2325.76	2325.76	2325.76	1.99511	2.99077	3.99242	4.99137
2324.33	0.99167	2324.33	2324.33	2324.33	2324.33	1.99512	2.99077	3.99244	4.99136
2322.9	0.99166	2322.9	2322.9	2322.9	2322.9	1.99514	2.99078	3.99246	4.99134
2321.48	0.99166	2321.48	2321.48	2321.48	2321.48	1.99515	2.99079	3.99249	4.99133
2320.05	0.99165	2320.05	2320.05	2320.05	2320.05	1.99517	2.99079	3.99251	4.99131
2318.62	0.99165	2318.62	2318.62	2318.62	2318.62	1.99518	2.9908	3.99253	4.99129
2317.19	0.99165	2317.19	2317.19	2317.19	2317.19	1.99519	2.9908	3.99255	4.99128
2315.77	0.99165	2315.77	2315.77	2315.77	2315.77	1.99521	2.99081	3.99257	4.99127
2314.34	0.99165	2314.34	2314.34	2314.34	2314.34	1.99522	2.99082	3.99259	4.99125
2312.91	0.99164	2312.91	2312.91	2312.91	2312.91	1.99524	2.99082	3.99262	4.99124
2311.48	0.99164	2311.48	2311.48	2311.48	2311.48	1.99525	2.99083	3.99264	4.99122
2310.06	0.99164	2310.06	2310.06	2310.06	2310.06	1.99527	2.99084	3.99266	4.99121
2308.63	0.99164	2308.63	2308.63	2308.63	2308.63	1.99528	2.99084	3.99268	4.99119
2307.2	0.99163	2307.2	2307.2	2307.2	2307.2	1.9953	2.99084	3.9927	4.99117
2305.77	0.99163	2305.77	2305.77	2305.77	2305.77	1.99531	2.99085	3.99272	4.99116
2304.34	0.99163	2304.34	2304.34	2304.34	2304.34	1.99533	2.99086	3.99274	4.99114
2302.92	0.99163	2302.92	2302.92	2302.92	2302.92	1.99534	2.99086	3.99277	4.99113
2301.49	0.99163	2301.49	2301.49	2301.49	2301.49	1.99536	2.99087	3.99279	4.99111
2300.06	0.99162	2300.06	2300.06	2300.06	2300.06	1.99537	2.99088	3.99281	4.9911
2298.63	0.99162	2298.63	2298.63	2298.63	2298.63	1.99539	2.99088	3.99284	4.99109
2297.21	0.99162	2297.21	2297.21	2297.21	2297.21	1.9954	2.99089	3.99286	4.99107
2295.78	0.99162	2295.78	2295.78	2295.78	2295.78	1.99542	2.99089	3.99288	4.99105
2294.35	0.99161	2294.35	2294.35	2294.35	2294.35	1.99543	2.9909	3.99291	4.99104
2292.92	0.99161	2292.92	2292.92	2292.92	2292.92	1.99545	2.99091	3.99293	4.99102
2291.49	0.9916	2291.49	2291.49	2291.49	2291.49	1.99546	2.99091	3.99295	4.99101
2290.07	0.9916	2290.07	2290.07	2290.07	2290.07	1.99547	2.99092	3.99297	4.99099
2288.64	0.9916	2288.64	2288.64	2288.64	2288.64	1.99549	2.99093	3.99299	4.99098
2287.21	0.9916	2287.21	2287.21	2287.21	2287.21	1.9955	2.99093	3.99301	4.99096
2285.78	0.9916	2285.78	2285.78	2285.78	2285.78	1.99552	2.99094	3.99303	4.99095
2284.36	0.99159	2284.36	2284.36	2284.36	2284.36	1.99553	2.99094	3.99306	4.99093
2282.93	0.99159	2282.93	2282.93	2282.93	2282.93	1.99555	2.99095	3.99308	4.99091
2281.5	0.99159	2281.5	2281.5	2281.5	2281.5	1.99556	2.99096	3.9931	4.9909
2280.07	0.99159	2280.07	2280.07	2280.07	2280.07	1.99557	2.99096	3.99312	4.99088
2278.65	0.99158	2278.65	2278.65	2278.65	2278.65	1.99559	2.99097	3.99314	4.99087
2277.22	0.99158	2277.22	2277.22	2277.22	2277.22	1.9956	2.99098	3.99316	4.99086
2275.79	0.99158	2275.79	2275.79	2275.79	2275.79	1.99562	2.99098	3.99319	4.99084
2274.36	0.99158	2274.36	2274.36	2274.36	2274.36	1.99563	2.99098	3.99321	4.99083
2272.93	0.99157	2272.93	2272.93	2272.93	2272.93	1.99565	2.99099	3.99323	4.99081
2271.51	0.99157	2271.51	2271.51	2271.51	2271.51	1.99566	2.991	3.99325	4.99079
2270.08	0.99157	2270.08	2270.08	2270.08	2270.08	1.99567	2.991	3.99327	4.99078
2268.65	0.99156	2268.65	2268.65	2268.65	2268.65	1.99569	2.99101	3.99329	4.99076
2267.22	0.99156	2267.22	2267.22	2267.22	2267.22	1.9957	2.99102	3.99331	4.99075
2265.8	0.99156	2265.8	2265.8	2265.8	2265.8	1.99572	2.99102	3.99334	4.99073
2264.37	0.99156	2264.37	2264.37	2264.37	2264.37	1.99573	2.99103	3.99336	4.99072
2262.94	0.99155	2262.94	2262.94	2262.94	2262.94	1.99575	2.99103	3.99338	4.9907
2261.51	0.99155	2261.51	2261.51	2261.51	2261.51	1.99576	2.99104	3.9934	4.99069
2260.08	0.99155	2260.08	2260.08	2260.08	2260.08	1.99577	2.99105	3.99342	4.99067
2258.66	0.99155	2258.66	2258.66	2258.66	2258.66	1.99579	2.99105	3.99344	4.99066
2257.23	0.99155	2257.23	2257.23	2257.23	2257.23	1.9958	2.99106	3.99347	4.99064
2255.8	0.99154	2255.8	2255.8	2255.8	2255.8	1.99582	2.99107	3.99349	4.99063
2254.37	0.99154	2254.37	2254.37	2254.37	2254.37	1.99583	2.99107	3.99351	4.99061
2252.95	0.99154	2252.95	2252.95	2252.95	2252.95	1.99585	2.99108	3.99353	4.9906
2251.52	0.99154	2251.52	2251.52	2251.52	2251.52	1.99586	2.99108	3.99355	4.99058
2250.09	0.99153	2250.09	2250.09	2250.09	2250.09	1.99587	2.99109	3.99357	4.99057
2248.66	0.99153	2248.66	2248.66	2248.66	2248.66	1.99589	2.9911	3.99359	4.99055
2247.24	0.99152	2247.24	2247.24	2247.24	2247.24	1.9959	2.9911	3.99362	4.99053
2245.81	0.99152	2245.81	2245.81	2245.81	2245.81	1.99592	2.99111	3.99364	4.99052
2244.38	0.99152	2244.38	2244.38	2244.38	2244.38	1.99593	2.99112	3.99366	4.9905
2242.95	0.99152	2242.95	2242.95	2242.95	2242.95	1.99595	2.99112	3.99368	4.99049
2241.52	0.99152	2241.52	2241.52	2241.52	2241.52	1.99596	2.99112	3.9937	4.99048
2240.1	0.99151	2240.1	2240.1	2240.1	2240.1	1.99598	2.99113	3.99372	4.99046
2238.67	0.99158	2238.67	2238.67	2238.67	2238.67	1.99595	2.99109	3.99361	4.99048
2237.24	0.99166	2237.24	2237.24	2237.24	2237.24	1.99587	2.99104	3.99334	4.9906
2235.81	0.99174	2235.81	2235.81	2235.81	2235.81	1.99576	2.991	3.99301	4.99079
2234.39	0.9918	2234.39	2234.39	2234.39	2234.39	1.99561	2.99096	3.9927	4.99102
2232.96	0.99181	2232.96	2232.96	2232.96	2232.96	1.99546	2.99089	3.99244	4.99124
2231.53	0.99181	2231.53	2231.53	2231.53	2231.53	1.99537	2.9908	3.99229	4.99143
2230.1	0.99181	2230.1	2230.1	2230.1	2230.1	1.99533	2.99069	3.9922	4.99155
2228.67	0.99181	2228.67	2228.67	2228.67	2228.67	1.99536	2.99057	3.99208	4.99157
2227.25	0.99183	2227.25	2227.25	2227.25	2227.25	1.9954	2.99048	3.99185	4.99149
2225.82	0.99183	2225.82	2225.82	2225.82	2225.82	1.99543	2.99043	3.99154	4.99128
2224.39	0.99183	2224.39	2224.39	2224.39	2224.39	1.99543	2.99043	3.99117	4.99098
2222.96	0.99183	2222.96	2222.96	2222.96	2222.96	1.99539	2.99044	3.99085	4.99063
2221.54	0.99181	2221.54	2221.54	2221.54	2221.54	1.99533	2.99042	3.99063	4.99026
2220.11	0.99181	2220.11	2220.11	2220.11	2220.11	1.99525	2.99036	3.99053	4.98991
2218.68	0.9918	2218.68	2218.68	2218.68	2218.68	1.99518	2.99028	3.99046	4.98964
2217.25	0.9918	2217.25	2217.25	2217.25	2217.25	1.99513	2.99021	3.99037	4.98948
2215.83	0.9918	2215.83	2215.83	2215.83	2215.83	1.99511	2.99015	3.99017	4.98944
2214.4	0.99179	2214.4	2214.4	2214.4	2214.4	1.99509	2.99007	3.98984	4.98951
2212.97	0.99175	2212.97	2212.97	2212.97	2212.97	1.99505	2.98993	3.98937	4.98967
2211.54	0.99169	2211.54	2211.54	2211.54	2211.54	1.99496	2.98972	3.98888	4.9899
2210.11	0.9916	2210.11	2210.11	2210.11	2210.11	1.99481	2.98947	3.98842	4.99014
2208.69	0.9915	2208.69	2208.69	2208.69	2208.69	1.9946	2.98923	3.98807	4.99036
2207.26	0.99138	2207.26	2207.26	2207.26	2207.26	1.99436	2.98905	3.98786	4.99052
2205.83	0.99127	2205.83	2205.83	2205.83	2205.83	1.99412	2.98893	3.98774	4.99059
2204.4	0.99118	2204.4	2204.4	2204.4	2204.4	1.99391	2.98887	3.98766	4.99056
2202.98	0.9911	2202.98	2202.98	2202.98	2202.98	1.99377	2.98885	3.98756	4.99044
2201.55	0.99103	2201.55	2201.55	2201.55	2201.55	1.99371	2.98886	3.98743	4.99025
2200.12	0.99097	2200.12	2200.12	2200.12	2200.12	1.99372	2.98894	3.9873	4.99001
2198.69	0.9909	2198.69	2198.69	2198.69	2198.69	1.99376	2.9891	3.98724	4.98975
2197.26	0.99082	2197.26	2197.26	2197.26	2197.26	1.99383	2.98936	3.98729	4.98955
2195.84	0.99073	2195.84	2195.84	2195.84	2195.84	1.99389	2.98967	3.98746	4.98943
2194.41	0.99063	2194.41	2194.41	2194.41	2194.41	1.99391	2.98998	3.9877	4.98941
2192.98	0.99053	2192.98	2192.98	2192.98	2192.98	1.99388	2.99024	3.98792	4.98953
2191.55	0.99044	2191.55	2191.55	2191.55	2191.55	1.99382	2.99043	3.98806	4.98976
2190.13	0.99033	2190.13	2190.13	2190.13	2190.13	1.99372	2.99057	3.98804	4.99008
2188.7	0.99016	2188.7	2188.7	2188.7	2188.7	1.99358	2.99068	3.98785	4.99043
2187.27	0.9899	2187.27	2187.27	2187.27	2187.27	1.99336	2.9907	3.98745	4.99073
2185.84	0.98954	2185.84	2185.84	2185.84	2185.84	1.99308	2.99063	3.98695	4.99094
2184.42	0.98921	2184.42	2184.42	2184.42	2184.42	1.99286	2.9905	3.98662	4.9911
2182.99	0.98902	2182.99	2182.99	2182.99	2182.99	1.99278	2.9904	3.98663	4.99126
2181.56	0.989	2181.56	2181.56	2181.56	2181.56	1.99287	2.99036	3.98702	4.99142
2180.13	0.98908	2180.13	2180.13	2180.13	2180.13	1.99303	2.99038	3.98757	4.9915
2178.7	0.98919	2178.7	2178.7	2178.7	2178.7	1.99316	2.99042	3.98807	4.99145
2177.28	0.98926	2177.28	2177.28	2177.28	2177.28	1.99321	2.99045	3.98843	4.99127
2175.85	0.98927	2175.85	2175.85	2175.85	2175.85	1.99319	2.99042	3.98863	4.99098
2174.42	0.98921	2174.42	2174.42	2174.42	2174.42	1.99311	2.99027	3.98874	4.99065
2172.99	0.98912	2172.99	2172.99	2172.99	2172.99	1.99301	2.99003	3.9888	4.99032
2171.57	0.98902	2171.57	2171.57	2171.57	2171.57	1.9929	2.98974	3.98884	4.99005
2170.14	0.98892	2170.14	2170.14	2170.14	2170.14	1.99279	2.98946	3.98886	4.98987
2168.71	0.98883	2168.71	2168.71	2168.71	2168.71	1.99265	2.98921	3.9888	4.98979
2167.28	0.98874	2167.28	2167.28	2167.28	2167.28	1.99246	2.98897	3.98862	4.98977
2165.86	0.98863	2165.86	2165.86	2165.86	2165.86	1.99221	2.98867	3.98831	4.9898
2164.43	0.98848	2164.43	2164.43	2164.43	2164.43	1.9919	2.9883	3.98784	4.98982
2163	0.98829	2163	2163	2163	2163	1.99153	2.98785	3.98724	4.98979
2161.57	0.98805	2161.57	2161.57	2161.57	2161.57	1.99111	2.98735	3.98653	4.98965
2160.14	0.98782	2160.14	2160.14	2160.14	2160.14	1.99066	2.98687	3.98576	4.98937
2158.72	0.98763	2158.72	2158.72	2158.72	2158.72	1.99023	2.98644	3.98503	4.98897
2157.29	0.98759	2157.29	2157.29	2157.29	2157.29	1.98995	2.98612	3.9845	4.98853
2155.86	0.98778	2155.86	2155.86	2155.86	2155.86	1.9899	2.98591	3.98435	4.98811
2154.43	0.98813	2154.43	2154.43	2154.43	2154.43	1.99004	2.98579	3.98451	4.98774
2153.01	0.98854	2153.01	2153.01	2153.01	2153.01	1.99027	2.9857	3.9848	4.98738
2151.58	0.98888	2151.58	2151.58	2151.58	2151.58	1.99045	2.98559	3.98504	4.98699
2150.15	0.98914	2150.15	2150.15	2150.15	2150.15	1.99055	2.98547	3.98518	4.9866
2148.72	0.98935	2148.72	2148.72	2148.72	2148.72	1.99059	2.98533	3.98528	4.98627
2147.29	0.98956	2147.29	2147.29	2147.29	2147.29	1.99061	2.98518	3.98538	4.98606
2145.87	0.98977	2145.87	2145.87	2145.87	2145.87	1.99062	2.98497	3.98547	4.98598
2144.44	0.98998	2144.44	2144.44	2144.44	2144.44	1.99063	2.98473	3.98554	4.98602
2143.01	0.99016	2143.01	2143.01	2143.01	2143.01	1.99063	2.98447	3.9856	4.98617
2141.58	0.99028	2141.58	2141.58	2141.58	2141.58	1.99063	2.98426	3.98565	4.98636
2140.16	0.99035	2140.16	2140.16	2140.16	2140.16	1.99062	2.98408	3.9857	4.98657
2138.73	0.99038	2138.73	2138.73	2138.73	2138.73	1.99059	2.98394	3.98577	4.98673
2137.3	0.99041	2137.3	2137.3	2137.3	2137.3	1.99056	2.98378	3.98583	4.98681
2135.87	0.99048	2135.87	2135.87	2135.87	2135.87	1.99054	2.9836	3.98591	4.98678
2134.45	0.99059	2134.45	2134.45	2134.45	2134.45	1.99056	2.98339	3.98597	4.98665
2133.02	0.99074	2133.02	2133.02	2133.02	2133.02	1.99059	2.9832	3.98603	4.98641
2131.59	0.99089	2131.59	2131.59	2131.59	2131.59	1.99065	2.98307	3.98609	4.9861
2130.16	0.99102	2130.16	2130.16	2130.16	2130.16	1.99071	2.98298	3.98616	4.98574
2128.73	0.99111	2128.73	2128.73	2128.73	2128.73	1.99076	2.98291	3.98624	4.98538
2127.31	0.99119	2127.31	2127.31	2127.31	2127.31	1.99081	2.98283	3.98638	4.98506
2125.88	0.99127	2125.88	2125.88	2125.88	2125.88	1.99085	2.98273	3.98654	4.98482
2124.45	0.99138	2124.45	2124.45	2124.45	2124.45	1.99091	2.98262	3.98673	4.98468
2123.02	0.99149	2123.02	2123.02	2123.02	2123.02	1.99099	2.98254	3.98687	4.98465
2121.6	0.9916	2121.6	2121.6	2121.6	2121.6	1.9911	2.9825	3.98696	4.98474
2120.17	0.99167	2120.17	2120.17	2120.17	2120.17	1.99125	2.98248	3.98701	4.98493
2118.74	0.99166	2118.74	2118.74	2118.74	2118.74	1.99141	2.98246	3.98701	4.98517
2117.31	0.99158	2117.31	2117.31	2117.31	2117.31	1.99158	2.98243	3.98699	4.98544
2115.88	0.99144	2115.88	2115.88	2115.88	2115.88	1.99172	2.98239	3.98702	4.98569
2114.46	0.99131	2114.46	2114.46	2114.46	2114.46	1.99184	2.98238	3.98709	4.9859
2113.03	0.99121	2113.03	2113.03	2113.03	2113.03	1.99193	2.98241	3.9872	4.98603
2111.6	0.99115	2111.6	2111.6	2111.6	2111.6	1.99198	2.98249	3.98734	4.98611
2110.17	0.99113	2110.17	2110.17	2110.17	2110.17	1.99201	2.9826	3.98748	4.98611
2108.75	0.9911	2108.75	2108.75	2108.75	2108.75	1.99206	2.98271	3.98761	4.98606
2107.32	0.99106	2107.32	2107.32	2107.32	2107.32	1.99215	2.98283	3.98774	4.98598
2105.89	0.99099	2105.89	2105.89	2105.89	2105.89	1.99231	2.98297	3.98791	4.98592
2104.46	0.99092	2104.46	2104.46	2104.46	2104.46	1.99251	2.98314	3.98816	4.9859
2103.04	0.99086	2103.04	2103.04	2103.04	2103.04	1.99273	2.98335	3.98848	4.98595
2101.61	0.99085	2101.61	2101.61	2101.61	2101.61	1.99293	2.98361	3.98886	4.98609
2100.18	0.9909	2100.18	2100.18	2100.18	2100.18	1.99309	2.98388	3.98926	4.98633
2098.75	0.99098	2098.75	2098.75	2098.75	2098.75	1.99321	2.98416	3.98964	4.98665
2097.32	0.99106	2097.32	2097.32	2097.32	2097.32	1.99329	2.98445	3.98998	4.98704
2095.9	0.9911	2095.9	2095.9	2095.9	2095.9	1.99335	2.98477	3.99025	4.98747
2094.47	0.9911	2094.47	2094.47	2094.47	2094.47	1.99343	2.98511	3.99048	4.98793
2093.04	0.99108	2093.04	2093.04	2093.04	2093.04	1.99356	2.9855	3.99073	4.98837
2091.61	0.99107	2091.61	2091.61	2091.61	2091.61	1.99374	2.98591	3.991	4.98878
2090.19	0.9911	2090.19	2090.19	2090.19	2090.19	1.99397	2.98634	3.9913	4.98912
2088.76	0.99117	2088.76	2088.76	2088.76	2088.76	1.99421	2.98677	3.99161	4.98938
2087.33	0.99126	2087.33	2087.33	2087.33	2087.33	1.99446	2.98721	3.99192	4.98958
2085.9	0.99133	2085.9	2085.9	2085.9	2085.9	1.99467	2.98766	3.99218	4.98973
2084.47	0.99134	2084.47	2084.47	2084.47	2084.47	1.99483	2.98812	3.99241	4.98984
2083.05	0.9913	2083.05	2083.05	2083.05	2083.05	1.99494	2.98858	3.9926	4.98994
2081.62	0.99123	2081.62	2081.62	2081.62	2081.62	1.99502	2.98903	3.9928	4.99005
2080.19	0.99118	2080.19	2080.19	2080.19	2080.19	1.99511	2.98945	3.993	4.99018
2078.76	0.99117	2078.76	2078.76	2078.76	2078.76	1.99522	2.98982	3.99323	4.99034
2077.34	0.99119	2077.34	2077.34	2077.34	2077.34	1.99538	2.99017	3.99344	4.99053
2075.91	0.99125	2075.91	2075.91	2075.91	2075.91	1.99556	2.99047	3.99363	4.99074
2074.48	0.99127	2074.48	2074.48	2074.48	2074.48	1.99574	2.99072	3.99375	4.99097
2073.05	0.99126	2073.05	2073.05	2073.05	2073.05	1.99589	2.99093	3.99381	4.99119
2071.63	0.99121	2071.63	2071.63	2071.63	2071.63	1.99599	2.99108	3.99382	4.9914
2070.2	0.99115	2070.2	2070.2	2070.2	2070.2	1.99601	2.99118	3.99381	4.99157
2068.77	0.99111	2068.77	2068.77	2068.77	2068.77	1.99594	2.99125	3.9938	4.99169
2067.34	0.99114	2067.34	2067.34	2067.34	2067.34	1.99583	2.99131	3.99381	4.99177
2065.91	0.99123	2065.91	2065.91	2065.91	2065.91	1.9957	2.99135	3.99385	4.9918
2064.49	0.99134	2064.49	2064.49	2064.49	2064.49	1.9956	2.99138	3.99392	4.99179
2063.06	0.99142	2063.06	2063.06	2063.06	2063.06	1.99556	2.99138	3.99398	4.99174
2061.63	0.99144	2061.63	2061.63	2061.63	2061.63	1.99557	2.99136	3.99404	4.99167
2060.2	0.99141	2060.2	2060.2	2060.2	2060.2	1.99564	2.99134	3.99409	4.99161
2058.78	0.99136	2058.78	2058.78	2058.78	2058.78	1.99574	2.99133	3.99415	4.99156
2057.35	0.99133	2057.35	2057.35	2057.35	2057.35	1.99583	2.99133	3.99423	4.99154
2055.92	0.99135	2055.92	2055.92	2055.92	2055.92	1.99586	2.99134	3.99428	4.99156
2054.49	0.9914	2054.49	2054.49	2054.49	2054.49	1.99581	2.99136	3.99434	4.99161
2053.06	0.99148	2053.06	2053.06	2053.06	2053.06	1.99571	2.99137	3.99438	4.99169
2051.64	0.99154	2051.64	2051.64	2051.64	2051.64	1.99558	2.99137	3.99442	4.99178
2050.21	0.99155	2050.21	2050.21	2050.21	2050.21	1.99546	2.99135	3.99445	4.99187
2048.78	0.99152	2048.78	2048.78	2048.78	2048.78	1.99542	2.99134	3.99446	4.99195
2047.35	0.99147	2047.35	2047.35	2047.35	2047.35	1.99545	2.99133	3.99447	4.99203
2045.93	0.99146	2045.93	2045.93	2045.93	2045.93	1.99555	2.99134	3.9945	4.99209
2044.5	0.99148	2044.5	2044.5	2044.5	2044.5	1.99568	2.99136	3.99452	4.99214
2043.07	0.99155	2043.07	2043.07	2043.07	2043.07	1.99578	2.99137	3.99451	4.99215
2041.64	0.99162	2041.64	2041.64	2041.64	2041.64	1.99582	2.99136	3.99445	4.99215
2040.22	0.99165	2040.22	2040.22	2040.22	2040.22	1.99578	2.99135	3.99435	4.99214
2038.79	0.99164	2038.79	2038.79	2038.79	2038.79	1.99569	2.99135	3.99427	4.99212
2037.36	0.99158	2037.36	2037.36	2037.36	2037.36	1.99558	2.99137	3.99422	4.9921
2035.93	0.99152	2035.93	2035.93	2035.93	2035.93	1.99551	2.9914	3.99423	4.99209
2034.5	0.99148	2034.5	2034.5	2034.5	2034.5	1.99553	2.99144	3.99431	4.9921
2033.08	0.99151	2033.08	2033.08	2033.08	2033.08	1.99563	2.99147	3.99443	4.99212
2031.65	0.99158	2031.65	2031.65	2031.65	2031.65	1.99579	2.99148	3.99452	4.99216
2030.22	0.99164	2030.22	2030.22	2030.22	2030.22	1.99596	2.99147	3.9945	4.99219
2028.79	0.99167	2028.79	2028.79	2028.79	2028.79	1.99609	2.99146	3.99436	4.99223
2027.37	0.99164	2027.37	2027.37	2027.37	2027.37	1.99616	2.99148	3.99413	4.99226
2025.94	0.9916	2025.94	2025.94	2025.94	2025.94	1.99615	2.99151	3.99392	4.9923
2024.51	0.99157	2024.51	2024.51	2024.51	2024.51	1.99609	2.99155	3.99379	4.99232
2023.08	0.99159	2023.08	2023.08	2023.08	2023.08	1.996	2.99156	3.99377	4.99235
2021.66	0.99165	2021.66	2021.66	2021.66	2021.66	1.99592	2.99155	3.99384	4.99236
2020.23	0.99175	2020.23	2020.23	2020.23	2020.23	1.9959	2.99154	3.99394	4.99236
2018.8	0.99182	2018.8	2018.8	2018.8	2018.8	1.99594	2.99152	3.994	4.99237
2017.37	0.99183	2017.37	2017.37	2017.37	2017.37	1.99605	2.99152	3.99396	4.99237
2015.94	0.99177	2015.94	2015.94	2015.94	2015.94	1.99618	2.99152	3.99383	4.99238
2014.52	0.99167	2014.52	2014.52	2014.52	2014.52	1.99632	2.99149	3.99365	4.99239
2013.09	0.99156	2013.09	2013.09	2013.09	2013.09	1.99639	2.99143	3.99352	4.99241
2011.66	0.99149	2011.66	2011.66	2011.66	2011.66	1.99638	2.99133	3.99352	4.99244
2010.23	0.99147	2010.23	2010.23	2010.23	2010.23	1.99631	2.99123	3.99367	4.99247
2008.81	0.9915	2008.81	2008.81	2008.81	2008.81	1.99622	2.99113	3.99395	4.99254
2007.38	0.99151	2007.38	2007.38	2007.38	2007.38	1.99614	2.99105	3.99426	4.99261
2005.95	0.99146	2005.95	2005.95	2005.95	2005.95	1.99608	2.99095	3.99447	4.99267
2004.52	0.99134	2004.52	2004.52	2004.52	2004.52	1.99606	2.99079	3.99446	4.99272
2003.09	0.99115	2003.09	2003.09	2003.09	2003.09	1.99607	2.99058	3.99423	4.99275
2001.67	0.99096	2001.67	2001.67	2001.67	2001.67	1.99612	2.99035	3.99391	4.99275
2000.24	0.99082	2000.24	2000.24	2000.24	2000.24	1.99619	2.99014	3.99363	4.99275
1998.81	0.99074	1998.81	1998.81	1998.81	1998.81	1.99624	2.98996	3.99353	4.99275
1997.38	0.99068	1997.38	1997.38	1997.38	1997.38	1.99623	2.98982	3.99363	4.99275
1995.96	0.99058	1995.96	1995.96	1995.96	1995.96	1.99615	2.98967	3.99384	4.99275
1994.53	0.9904	1994.53	1994.53	1994.53	1994.53	1.99603	2.9895	3.99404	4.99275
1993.1	0.99014	1993.1	1993.1	1993.1	1993.1	1.9959	2.98931	3.99409	4.99274
1991.67	0.98984	1991.67	1991.67	1991.67	1991.67	1.99583	2.98912	3.99395	4.99272
1990.25	0.98957	1990.25	1990.25	1990.25	1990.25	1.99583	2.98896	3.99369	4.99271
1988.82	0.98936	1988.82	1988.82	1988.82	1988.82	1.99592	2.98884	3.99344	4.99269
1987.39	0.98923	1987.39	1987.39	1987.39	1987.39	1.99605	2.98875	3.99335	4.99267
1985.96	0.98914	1985.96	1985.96	1985.96	1985.96	1.99618	2.98866	3.99345	4.99264
1984.53	0.98904	1984.53	1984.53	1984.53	1984.53	1.99626	2.98855	3.99377	4.99261
1983.11	0.9889	1983.11	1983.11	1983.11	1983.11	1.99624	2.98843	3.99414	4.99259
1981.68	0.98873	1981.68	1981.68	1981.68	1981.68	1.99614	2.98831	3.99442	4.99257
1980.25	0.98852	1980.25	1980.25	1980.25	1980.25	1.99593	2.9882	3.99446	4.99253
1978.82	0.98833	1978.82	1978.82	1978.82	1978.82	1.99567	2.9881	3.9942	4.99247
1977.4	0.98818	1977.4	1977.4	1977.4	1977.4	1.99543	2.98798	3.99376	4.99239
1975.97	0.98811	1975.97	1975.97	1975.97	1975.97	1.99528	2.98783	3.99329	4.9923
1974.54	0.98807	1974.54	1974.54	1974.54	1974.54	1.99523	2.98765	3.993	4.99224
1973.11	0.98803	1973.11	1973.11	1973.11	1973.11	1.99526	2.98747	3.99292	4.9922
1971.68	0.98792	1971.68	1971.68	1971.68	1971.68	1.99531	2.98734	3.99302	4.99218
1970.26	0.98778	1970.26	1970.26	1970.26	1970.26	1.99534	2.98727	3.99317	4.99217
1968.83	0.98762	1968.83	1968.83	1968.83	1968.83	1.99531	2.98724	3.99324	4.99218
1967.4	0.9875	1967.4	1967.4	1967.4	1967.4	1.99521	2.98723	3.99309	4.99218
1965.97	0.98747	1965.97	1965.97	1965.97	1965.97	1.99509	2.9872	3.99277	4.99218
1964.55	0.98753	1964.55	1964.55	1964.55	1964.55	1.99498	2.98716	3.99237	4.99216
1963.12	0.98766	1963.12	1963.12	1963.12	1963.12	1.99496	2.98716	3.99203	4.99215
1961.69	0.9878	1961.69	1961.69	1961.69	1961.69	1.99503	2.98722	3.99192	4.99214
1960.26	0.98792	1960.26	1960.26	1960.26	1960.26	1.99521	2.98736	3.99202	4.99215
1958.84	0.98801	1958.84	1958.84	1958.84	1958.84	1.99544	2.98753	3.99228	4.99216
1957.41	0.98811	1957.41	1957.41	1957.41	1957.41	1.99564	2.98771	3.99251	4.99218
1955.98	0.98822	1955.98	1955.98	1955.98	1955.98	1.99573	2.98785	3.99253	4.99217
1954.55	0.98837	1954.55	1954.55	1954.55	1954.55	1.99567	2.98796	3.99229	4.99214
1953.12	0.98853	1953.12	1953.12	1953.12	1953.12	1.99547	2.98805	3.99184	4.9921
1951.7	0.98868	1951.7	1951.7	1951.7	1951.7	1.99522	2.98816	3.99136	4.99207
1950.27	0.98879	1950.27	1950.27	1950.27	1950.27	1.995	2.98832	3.991	4.99206
1948.84	0.98886	1948.84	1948.84	1948.84	1948.84	1.99487	2.9885	3.99088	4.99206
1947.41	0.98889	1947.41	1947.41	1947.41	1947.41	1.99485	2.98868	3.99099	4.99209
1945.99	0.98892	1945.99	1945.99	1945.99	1945.99	1.99494	2.98885	3.99123	4.99213
1944.56	0.98901	1944.56	1944.56	1944.56	1944.56	1.99507	2.98901	3.99146	4.99218
1943.13	0.98917	1943.13	1943.13	1943.13	1943.13	1.99521	2.9892	3.99162	4.99222
1941.7	0.98941	1941.7	1941.7	1941.7	1941.7	1.99531	2.98941	3.9917	4.99227
1940.27	0.98969	1940.27	1940.27	1940.27	1940.27	1.99536	2.98964	3.99175	4.99232
1938.85	0.98995	1938.85	1938.85	1938.85	1938.85	1.99534	2.98986	3.99186	4.99236
1937.42	0.99017	1937.42	1937.42	1937.42	1937.42	1.99528	2.99004	3.99209	4.99241
1935.99	0.99034	1935.99	1935.99	1935.99	1935.99	1.99523	2.99018	3.99242	4.99245
1934.56	0.9905	1934.56	1934.56	1934.56	1934.56	1.99522	2.99031	3.99282	4.9925
1933.14	0.99069	1933.14	1933.14	1933.14	1933.14	1.99527	2.99045	3.99321	4.99256
1931.71	0.99093	1931.71	1931.71	1931.71	1931.71	1.99537	2.99059	3.9935	4.99263
1930.28	0.99117	1930.28	1930.28	1930.28	1930.28	1.99549	2.99071	3.99362	4.99269
1928.85	0.99135	1928.85	1928.85	1928.85	1928.85	1.99556	2.99079	3.99357	4.99273
1927.43	0.99145	1927.43	1927.43	1927.43	1927.43	1.99558	2.99082	3.99347	4.99278
1926	0.99146	1926	1926	1926	1926	1.99554	2.99082	3.99338	4.99283
1924.57	0.99142	1924.57	1924.57	1924.57	1924.57	1.99546	2.99083	3.99337	4.9929
1923.14	0.99136	1923.14	1923.14	1923.14	1923.14	1.99536	2.99086	3.99342	4.99297
1921.71	0.99134	1921.71	1921.71	1921.71	1921.71	1.9953	2.99092	3.9935	4.99302
1920.29	0.99137	1920.29	1920.29	1920.29	1920.29	1.99532	2.99098	3.99357	4.99306
1918.86	0.99144	1918.86	1918.86	1918.86	1918.86	1.99542	2.99102	3.99364	4.99309
1917.43	0.99151	1917.43	1917.43	1917.43	1917.43	1.99561	2.99104	3.99371	4.99311
1916	0.99154	1916	1916	1916	1916	1.99584	2.99105	3.99378	4.99313
1914.58	0.9915	1914.58	1914.58	1914.58	1914.58	1.99608	2.99109	3.99386	4.99316
1913.15	0.99144	1913.15	1913.15	1913.15	1913.15	1.99626	2.99116	3.99397	4.9932
1911.72	0.99142	1911.72	1911.72	1911.72	1911.72	1.99636	2.99125	3.99408	4.99324
1910.29	0.99144	1910.29	1910.29	1910.29	1910.29	1.99634	2.99132	3.99417	4.99328
1908.86	0.99151	1908.86	1908.86	1908.86	1908.86	1.99623	2.99135	3.99419	4.9933
1907.44	0.99159	1907.44	1907.44	1907.44	1907.44	1.99611	2.99135	3.99419	4.99332
1906.01	0.99165	1906.01	1906.01	1906.01	1906.01	1.99605	2.99134	3.99422	4.99335
1904.58	0.99165	1904.58	1904.58	1904.58	1904.58	1.99609	2.99135	3.99426	4.9934
1903.15	0.99155	1903.15	1903.15	1903.15	1903.15	1.99621	2.99138	3.99425	4.99344
1901.73	0.99138	1901.73	1901.73	1901.73	1901.73	1.99638	2.99141	3.99415	4.99348
1900.3	0.99126	1900.3	1900.3	1900.3	1900.3	1.99654	2.99145	3.99399	4.99351
1898.87	0.99123	1898.87	1898.87	1898.87	1898.87	1.99666	2.99147	3.9938	4.99355
1897.44	0.99129	1897.44	1897.44	1897.44	1897.44	1.99666	2.99149	3.99359	4.99359
1896.02	0.99139	1896.02	1896.02	1896.02	1896.02	1.99654	2.99152	3.99341	4.99362
1894.59	0.99144	1894.59	1894.59	1894.59	1894.59	1.99637	2.99158	3.99329	4.99364
1893.16	0.99144	1893.16	1893.16	1893.16	1893.16	1.99621	2.99166	3.99328	4.99365
1891.73	0.99138	1891.73	1891.73	1891.73	1891.73	1.99614	2.99174	3.99337	4.99368
1890.3	0.99129	1890.3	1890.3	1890.3	1890.3	1.99615	2.99181	3.99349	4.9937
1888.88	0.99125	1888.88	1888.88	1888.88	1888.88	1.99628	2.99188	3.99356	4.99374
1887.45	0.99129	1887.45	1887.45	1887.45	1887.45	1.99651	2.99196	3.99355	4.99379
1886.02	0.99142	1886.02	1886.02	1886.02	1886.02	1.99676	2.99206	3.99349	4.99386
1884.59	0.99159	1884.59	1884.59	1884.59	1884.59	1.99692	2.99217	3.99343	4.99393
1883.17	0.9917	1883.17	1883.17	1883.17	1883.17	1.99688	2.99227	3.99342	4.99399
1881.74	0.99168	1881.74	1881.74	1881.74	1881.74	1.99663	2.99232	3.99345	4.994
1880.31	0.99155	1880.31	1880.31	1880.31	1880.31	1.99627	2.99235	3.99356	4.99397
1878.88	0.9914	1878.88	1878.88	1878.88	1878.88	1.99593	2.99235	3.99373	4.99394
1877.46	0.99131	1877.46	1877.46	1877.46	1877.46	1.99574	2.99236	3.99389	4.99391
1876.03	0.9913	1876.03	1876.03	1876.03	1876.03	1.99568	2.99237	3.99387	4.9939
1874.6	0.99135	1874.6	1874.6	1874.6	1874.6	1.99574	2.99239	3.99364	4.99387
1873.17	0.99142	1873.17	1873.17	1873.17	1873.17	1.99587	2.99239	3.99328	4.99385
1871.74	0.99144	1871.74	1871.74	1871.74	1871.74	1.99601	2.99237	3.99299	4.99384
1870.32	0.9914	1870.32	1870.32	1870.32	1870.32	1.99607	2.99234	3.99288	4.99386
1868.89	0.99131	1868.89	1868.89	1868.89	1868.89	1.99603	2.9923	3.993	4.99389
1867.46	0.99121	1867.46	1867.46	1867.46	1867.46	1.99587	2.99227	3.99328	4.99395
1866.03	0.99115	1866.03	1866.03	1866.03	1866.03	1.99568	2.99225	3.99358	4.99403
1864.61	0.9912	1864.61	1864.61	1864.61	1864.61	1.99555	2.99226	3.99379	4.99415
1863.18	0.99135	1863.18	1863.18	1863.18	1863.18	1.99557	2.99227	3.99382	4.99429
1861.75	0.99154	1861.75	1861.75	1861.75	1861.75	1.99576	2.99227	3.99369	4.99444
1860.32	0.99168	1860.32	1860.32	1860.32	1860.32	1.99608	2.99225	3.99349	4.99458
1858.89	0.99173	1858.89	1858.89	1858.89	1858.89	1.99642	2.99221	3.9933	4.99465
1857.47	0.99164	1857.47	1857.47	1857.47	1857.47	1.99664	2.99216	3.9932	4.99465
1856.04	0.99147	1856.04	1856.04	1856.04	1856.04	1.99664	2.99213	3.99314	4.99454
1854.61	0.9913	1854.61	1854.61	1854.61	1854.61	1.99642	2.99211	3.99309	4.99434
1853.18	0.99122	1853.18	1853.18	1853.18	1853.18	1.99607	2.9921	3.99298	4.99408
1851.76	0.99125	1851.76	1851.76	1851.76	1851.76	1.99568	2.99207	3.99278	4.99381
1850.33	0.99133	1850.33	1850.33	1850.33	1850.33	1.99534	2.99203	3.99248	4.99354
1848.9	0.99139	1848.9	1848.9	1848.9	1848.9	1.99514	2.99199	3.99213	4.99328
1847.47	0.99138	1847.47	1847.47	1847.47	1847.47	1.99506	2.99195	3.99185	4.99304
1846.05	0.9913	1846.05	1846.05	1846.05	1846.05	1.99512	2.9919	3.99178	4.99284
1844.62	0.99116	1844.62	1844.62	1844.62	1844.62	1.99524	2.9918	3.99192	4.99266
1843.19	0.99103	1843.19	1843.19	1843.19	1843.19	1.99534	2.99167	3.9922	4.9925
1841.76	0.99095	1841.76	1841.76	1841.76	1841.76	1.99538	2.99157	3.9925	4.99239
1840.33	0.99092	1840.33	1840.33	1840.33	1840.33	1.99528	2.99152	3.99269	4.99232
1838.91	0.99086	1838.91	1838.91	1838.91	1838.91	1.99504	2.99152	3.99267	4.99228
1837.48	0.99074	1837.48	1837.48	1837.48	1837.48	1.99467	2.99153	3.9924	4.99226
1836.05	0.99055	1836.05	1836.05	1836.05	1836.05	1.99429	2.99154	3.99201	4.99224
1834.62	0.99033	1834.62	1834.62	1834.62	1834.62	1.99402	2.9915	3.9917	4.99221
1833.2	0.99014	1833.2	1833.2	1833.2	1833.2	1.99389	2.99141	3.99154	4.99214
1831.77	0.99	1831.77	1831.77	1831.77	1831.77	1.99386	2.99128	3.99146	4.992
1830.34	0.98989	1830.34	1830.34	1830.34	1830.34	1.99389	2.99115	3.99136	4.99178
1828.91	0.98978	1828.91	1828.91	1828.91	1828.91	1.99396	2.99105	3.99114	4.9915
1827.48	0.98968	1827.48	1827.48	1827.48	1827.48	1.99403	2.99097	3.9908	4.99119
1826.06	0.98955	1826.06	1826.06	1826.06	1826.06	1.99401	2.99084	3.99034	4.99088
1824.63	0.98938	1824.63	1824.63	1824.63	1824.63	1.99382	2.99063	3.98982	4.99053
1823.2	0.98919	1823.2	1823.2	1823.2	1823.2	1.99347	2.99032	3.98928	4.99015
1821.77	0.98904	1821.77	1821.77	1821.77	1821.77	1.99305	2.98998	3.98884	4.98973
1820.35	0.989	1820.35	1820.35	1820.35	1820.35	1.99273	2.98962	3.98859	4.98932
1818.92	0.98908	1818.92	1818.92	1818.92	1818.92	1.99257	2.98926	3.98848	4.98892
1817.49	0.98918	1817.49	1817.49	1817.49	1817.49	1.99257	2.98883	3.98835	4.98852
1816.06	0.98921	1816.06	1816.06	1816.06	1816.06	1.99261	2.98831	3.98802	4.98806
1814.64	0.98913	1814.64	1814.64	1814.64	1814.64	1.9926	2.98769	3.98738	4.98754
1813.21	0.98899	1813.21	1813.21	1813.21	1813.21	1.99242	2.98701	3.98653	4.98694
1811.78	0.98887	1811.78	1811.78	1811.78	1811.78	1.99203	2.98632	3.98565	4.98628
1810.35	0.98886	1810.35	1810.35	1810.35	1810.35	1.99143	2.98561	3.98485	4.98555
1808.92	0.98899	1808.92	1808.92	1808.92	1808.92	1.99065	2.98485	3.9842	4.98477
1807.5	0.98922	1807.5	1807.5	1807.5	1807.5	1.98977	2.98402	3.98366	4.98391
1806.07	0.98945	1806.07	1806.07	1806.07	1806.07	1.98888	2.98311	3.98309	4.98297
1804.64	0.98956	1804.64	1804.64	1804.64	1804.64	1.98808	2.98215	3.98232	4.98195
1803.21	0.98949	1803.21	1803.21	1803.21	1803.21	1.98746	2.98116	3.98132	4.98083
1801.79	0.98934	1801.79	1801.79	1801.79	1801.79	1.98701	2.98018	3.9802	4.97967
1800.36	0.98919	1800.36	1800.36	1800.36	1800.36	1.98666	2.97921	3.97909	4.9785
1798.93	0.98912	1798.93	1798.93	1798.93	1798.93	1.98625	2.97818	3.97809	4.97731
1797.5	0.98917	1797.5	1797.5	1797.5	1797.5	1.9856	2.97706	3.97719	4.97611
1796.07	0.98931	1796.07	1796.07	1796.07	1796.07	1.98468	2.97582	3.97634	4.97489
1794.65	0.98944	1794.65	1794.65	1794.65	1794.65	1.98355	2.9745	3.97544	4.97367
1793.22	0.98952	1793.22	1793.22	1793.22	1793.22	1.98237	2.97318	3.97448	4.97248
1791.79	0.98955	1791.79	1791.79	1791.79	1791.79	1.98128	2.97186	3.97342	4.97132
1790.36	0.98957	1790.36	1790.36	1790.36	1790.36	1.98035	2.97052	3.97231	4.97018
1788.94	0.98963	1788.94	1788.94	1788.94	1788.94	1.97953	2.96906	3.97113	4.969
1787.51	0.98976	1787.51	1787.51	1787.51	1787.51	1.97876	2.96748	3.96989	4.96776
1786.08	0.98993	1786.08	1786.08	1786.08	1786.08	1.97799	2.96583	3.96861	4.96642
1784.65	0.9901	1784.65	1784.65	1784.65	1784.65	1.97721	2.96424	3.96732	4.96501
1783.23	0.99022	1783.23	1783.23	1783.23	1783.23	1.97635	2.96276	3.96601	4.96354
1781.8	0.99027	1781.8	1781.8	1781.8	1781.8	1.97528	2.96131	3.9646	4.96198
1780.37	0.99024	1780.37	1780.37	1780.37	1780.37	1.97391	2.9598	3.96305	4.9603
1778.94	0.99016	1778.94	1778.94	1778.94	1778.94	1.9723	2.95814	3.96131	4.95847
1777.51	0.99003	1777.51	1777.51	1777.51	1777.51	1.9706	2.95631	3.95943	4.95651
1776.09	0.9899	1776.09	1776.09	1776.09	1776.09	1.96896	2.95432	3.9575	4.95441
1774.66	0.98979	1774.66	1774.66	1774.66	1774.66	1.96746	2.9522	3.9556	4.95222
1773.23	0.98968	1773.23	1773.23	1773.23	1773.23	1.96611	2.94997	3.95375	4.94993
1771.8	0.9895	1771.8	1771.8	1771.8	1771.8	1.96476	2.94762	3.95183	4.94757
1770.38	0.98922	1770.38	1770.38	1770.38	1770.38	1.96329	2.94509	3.94973	4.94511
1768.95	0.98882	1768.95	1768.95	1768.95	1768.95	1.96157	2.94235	3.94737	4.94257
1767.52	0.98834	1767.52	1767.52	1767.52	1767.52	1.95958	2.93939	3.94481	4.93996
1766.09	0.98786	1766.09	1766.09	1766.09	1766.09	1.95728	2.93624	3.94211	4.93727
1764.67	0.98743	1764.67	1764.67	1764.67	1764.67	1.9547	2.93295	3.93937	4.93445
1763.24	0.98705	1763.24	1763.24	1763.24	1763.24	1.95192	2.92956	3.93663	4.93145
1761.81	0.98662	1761.81	1761.81	1761.81	1761.81	1.94908	2.92609	3.93385	4.92824
1760.38	0.98607	1760.38	1760.38	1760.38	1760.38	1.94635	2.92257	3.93096	4.92482
1758.95	0.98535	1758.95	1758.95	1758.95	1758.95	1.94379	2.919	3.92787	4.92124
1757.53	0.98446	1757.53	1757.53	1757.53	1757.53	1.94139	2.91541	3.92452	4.9175
1756.1	0.98348	1756.1	1756.1	1756.1	1756.1	1.939	2.9118	3.92092	4.91364
1754.67	0.98256	1754.67	1754.67	1754.67	1754.67	1.93649	2.90818	3.91725	4.90968
1753.24	0.9818	1753.24	1753.24	1753.24	1753.24	1.93378	2.90454	3.91371	4.90566
1751.82	0.98122	1751.82	1751.82	1751.82	1751.82	1.9309	2.90088	3.9105	4.90166
1750.39	0.98069	1750.39	1750.39	1750.39	1750.39	1.92788	2.89717	3.90755	4.89771
1748.96	0.97997	1748.96	1748.96	1748.96	1748.96	1.92472	2.89335	3.90456	4.89379
1747.53	0.97884	1747.53	1747.53	1747.53	1747.53	1.92144	2.88943	3.90111	4.88984
1746.1	0.9773	1746.1	1746.1	1746.1	1746.1	1.91818	2.88542	3.89701	4.88583
1744.68	0.97549	1744.68	1744.68	1744.68	1744.68	1.91502	2.88133	3.89234	4.88176
1743.25	0.97359	1743.25	1743.25	1743.25	1743.25	1.91195	2.87711	3.88728	4.87764
1741.82	0.9717	1741.82	1741.82	1741.82	1741.82	1.90885	2.87271	3.88209	4.87348
1740.39	0.96986	1740.39	1740.39	1740.39	1740.39	1.90557	2.86805	3.87701	4.86926
1738.97	0.96802	1738.97	1738.97	1738.97	1738.97	1.90199	2.86308	3.87209	4.86491
1737.54	0.96613	1737.54	1737.54	1737.54	1737.54	1.89799	2.85776	3.86726	4.86036
1736.11	0.96413	1736.11	1736.11	1736.11	1736.11	1.89358	2.85213	3.86233	4.85551
1734.68	0.96203	1734.68	1734.68	1734.68	1734.68	1.88888	2.84623	3.85712	4.85032
1733.26	0.95986	1733.26	1733.26	1733.26	1733.26	1.88403	2.84012	3.85155	4.84479
1731.83	0.95765	1731.83	1731.83	1731.83	1731.83	1.87913	2.8338	3.84558	4.83895
1730.4	0.95538	1730.4	1730.4	1730.4	1730.4	1.87418	2.82723	3.83923	4.83277
1728.97	0.95302	1728.97	1728.97	1728.97	1728.97	1.86918	2.82036	3.83265	4.82626
1727.54	0.95056	1727.54	1727.54	1727.54	1727.54	1.8641	2.81322	3.82599	4.81948
1726.12	0.94803	1726.12	1726.12	1726.12	1726.12	1.85891	2.80587	3.81941	4.81251
1724.69	0.9455	1724.69	1724.69	1724.69	1724.69	1.85355	2.79834	3.81296	4.80547
1723.26	0.94297	1723.26	1723.26	1723.26	1723.26	1.84793	2.79063	3.80653	4.79839
1721.83	0.94037	1721.83	1721.83	1721.83	1721.83	1.84195	2.78269	3.79986	4.79126
1720.41	0.93761	1720.41	1720.41	1720.41	1720.41	1.83561	2.77448	3.7927	4.78402
1718.98	0.93463	1718.98	1718.98	1718.98	1718.98	1.82905	2.76593	3.78505	4.77656
1717.55	0.93146	1717.55	1717.55	1717.55	1717.55	1.82239	2.75701	3.77716	4.76884
1716.12	0.92812	1716.12	1716.12	1716.12	1716.12	1.8157	2.74773	3.76927	4.76084
1714.69	0.9245	1714.69	1714.69	1714.69	1714.69	1.80888	2.73813	3.76139	4.75252
1713.27	0.92042	1713.27	1713.27	1713.27	1713.27	1.80176	2.7281	3.75328	4.74373
1711.84	0.91571	1711.84	1711.84	1711.84	1711.84	1.79415	2.71745	3.74452	4.73428
1710.41	0.91025	1710.41	1710.41	1710.41	1710.41	1.78581	2.70592	3.73473	4.72401
1708.98	0.90386	1708.98	1708.98	1708.98	1708.98	1.77648	2.69328	3.72349	4.71273
1707.56	0.89632	1707.56	1707.56	1707.56	1707.56	1.76593	2.67917	3.7104	4.70018
1706.13	0.88737	1706.13	1706.13	1706.13	1706.13	1.75395	2.66331	3.69511	4.68614
1704.7	0.87684	1704.7	1704.7	1704.7	1704.7	1.74047	2.64545	3.67741	4.67042
1703.27	0.86459	1703.27	1703.27	1703.27	1703.27	1.72543	2.6253	3.65706	4.65281
1701.85	0.85051	1701.85	1701.85	1701.85	1701.85	1.70879	2.60253	3.63383	4.63314
1700.42	0.83458	1700.42	1700.42	1700.42	1700.42	1.69054	2.57698	3.60756	4.6113
1698.99	0.81676	1698.99	1698.99	1698.99	1698.99	1.67061	2.54873	3.57821	4.58729
1697.56	0.79677	1697.56	1697.56	1697.56	1697.56	1.64883	2.51786	3.54579	4.56098
1696.13	0.77418	1696.13	1696.13	1696.13	1696.13	1.62492	2.48446	3.51044	4.53222
1694.71	0.74869	1694.71	1694.71	1694.71	1694.71	1.59875	2.44871	3.47267	4.50105
1693.28	0.72036	1693.28	1693.28	1693.28	1693.28	1.57044	2.41106	3.43335	4.4678
1691.85	0.68948	1691.85	1691.85	1691.85	1691.85	1.54038	2.37223	3.39347	4.43302
1690.42	0.65637	1690.42	1690.42	1690.42	1690.42	1.50904	2.33301	3.35393	4.39731
1689	0.62135	1689	1689	1689	1689	1.47692	2.29432	3.3154	4.36131
1687.57	0.58472	1687.57	1687.57	1687.57	1687.57	1.44451	2.25703	3.27838	4.3256
1686.14	0.54683	1686.14	1686.14	1686.14	1686.14	1.41225	2.22189	3.24344	4.29078
1684.71	0.50818	1684.71	1684.71	1684.71	1684.71	1.38056	2.18943	3.21107	4.25737
1683.28	0.46925	1683.28	1683.28	1683.28	1683.28	1.34975	2.16002	3.18174	4.22586
1681.86	0.43048	1681.86	1681.86	1681.86	1681.86	1.32	2.13385	3.15576	4.19666
1680.43	0.39231	1680.43	1680.43	1680.43	1680.43	1.29143	2.1109	3.13324	4.17007
1679	0.35521	1679	1679	1679	1679	1.26412	2.0911	3.11411	4.14624
1677.57	0.31971	1677.57	1677.57	1677.57	1677.57	1.23824	2.07438	3.09818	4.12529
1676.15	0.2862	1676.15	1676.15	1676.15	1676.15	1.21391	2.06059	3.08507	4.10719
1674.72	0.25489	1674.72	1674.72	1674.72	1674.72	1.19121	2.04942	3.07427	4.09176
1673.29	0.22586	1673.29	1673.29	1673.29	1673.29	1.17016	2.04044	3.06534	4.07872
1671.86	0.19914	1671.86	1671.86	1671.86	1671.86	1.15077	2.03324	3.05799	4.06775
1670.44	0.17455	1670.44	1670.44	1670.44	1670.44	1.13282	2.02739	3.05189	4.05841
1669.01	0.15163	1669.01	1669.01	1669.01	1669.01	1.1159	2.02241	3.04656	4.05008
1667.58	0.12999	1667.58	1667.58	1667.58	1667.58	1.09967	2.01797	3.04152	4.04232
1666.15	0.10957	1666.15	1666.15	1666.15	1666.15	1.08415	2.01401	3.03652	4.035
1664.72	0.09061	1664.72	1664.72	1664.72	1664.72	1.06959	2.01058	3.0316	4.02827
1663.3	0.07331	1663.3	1663.3	1663.3	1663.3	1.05618	2.00767	3.02682	4.02224
1661.87	0.05769	1661.87	1661.87	1661.87	1661.87	1.04393	2.00523	3.02221	4.01687
1660.44	0.04366	1660.44	1660.44	1660.44	1660.44	1.03284	2.00323	3.01778	4.01212
1659.01	0.03126	1659.01	1659.01	1659.01	1659.01	1.02309	2.00169	3.0137	4.008
1657.59	0.02068	1657.59	1657.59	1657.59	1657.59	1.01493	2.00066	3.01014	4.00463
1656.16	0.01215	1656.16	1656.16	1656.16	1656.16	1.00855	2.00012	3.00721	4.00214
1654.73	0.00582	1654.73	1654.73	1654.73	1654.73	1.00399	2	3.00489	4.00059
1653.3	0.00175	1653.3	1653.3	1653.3	1653.3	1.00118	2.00017	3.00308	4
1651.87	0	1651.87	1651.87	1651.87	1651.87	1	2.00058	3.00168	4.00036
1650.45	6.0867E-4	1650.45	1650.45	1650.45	1650.45	1.00039	2.00131	3.00064	4.00164
1649.02	0.00373	1649.02	1649.02	1649.02	1649.02	1.00251	2.00258	3	4.00385
1647.59	0.00973	1647.59	1647.59	1647.59	1647.59	1.0067	2.00458	3.00008	4.00712
1646.16	0.01901	1646.16	1646.16	1646.16	1646.16	1.01326	2.00742	3.00128	4.01156
1644.74	0.03182	1644.74	1644.74	1644.74	1644.74	1.02229	2.01106	3.00395	4.01721
1643.31	0.04816	1643.31	1643.31	1643.31	1643.31	1.03366	2.01546	3.00811	4.02399
1641.88	0.06785	1641.88	1641.88	1641.88	1641.88	1.04723	2.02071	3.0135	4.03181
1640.45	0.09061	1640.45	1640.45	1640.45	1640.45	1.06288	2.02698	3.0198	4.04062
1639.03	0.1162	1639.03	1639.03	1639.03	1639.03	1.08056	2.0345	3.02679	4.05045
1637.6	0.14453	1637.6	1637.6	1637.6	1637.6	1.10027	2.04344	3.03466	4.06144
1636.17	0.17558	1636.17	1636.17	1636.17	1636.17	1.12193	2.05389	3.04394	4.07386
1634.74	0.20926	1634.74	1634.74	1634.74	1634.74	1.14535	2.06592	3.0552	4.0879
1633.31	0.24519	1633.31	1633.31	1633.31	1633.31	1.17021	2.07953	3.06875	4.10361
1631.89	0.2828	1631.89	1631.89	1631.89	1631.89	1.19622	2.09471	3.0845	4.12095
1630.46	0.32161	1630.46	1630.46	1630.46	1630.46	1.22337	2.11159	3.10231	4.14001
1629.03	0.3614	1629.03	1629.03	1629.03	1629.03	1.25183	2.13044	3.12226	4.16099
1627.6	0.40198	1627.6	1627.6	1627.6	1627.6	1.28174	2.15148	3.14449	4.18411
1626.18	0.44307	1626.18	1626.18	1626.18	1626.18	1.31298	2.17469	3.16911	4.20935
1624.75	0.48414	1624.75	1624.75	1624.75	1624.75	1.34527	2.19993	3.1961	4.23651
1623.32	0.52469	1623.32	1623.32	1623.32	1623.32	1.37837	2.22706	3.22539	4.26536
1621.89	0.56431	1621.89	1621.89	1621.89	1621.89	1.41225	2.25605	3.25695	4.29574
1620.47	0.60288	1620.47	1620.47	1620.47	1620.47	1.44699	2.2869	3.29072	4.32756
1619.04	0.64029	1619.04	1619.04	1619.04	1619.04	1.48253	2.31944	3.32653	4.36067
1617.61	0.67626	1617.61	1617.61	1617.61	1617.61	1.51854	2.35326	3.36392	4.39474
1616.18	0.7103	1616.18	1616.18	1616.18	1616.18	1.55442	2.38773	3.4023	4.42927
1614.75	0.74198	1614.75	1614.75	1614.75	1614.75	1.58968	2.42221	3.44101	4.46377
1613.33	0.77099	1613.33	1613.33	1613.33	1613.33	1.62392	2.45615	3.47955	4.49782
1611.9	0.79718	1611.9	1611.9	1611.9	1611.9	1.65685	2.48911	3.51754	4.53108
1610.47	0.82048	1610.47	1610.47	1610.47	1610.47	1.68819	2.52083	3.55465	4.56326
1609.04	0.84101	1609.04	1609.04	1609.04	1609.04	1.71774	2.55114	3.59053	4.59418
1607.62	0.85899	1607.62	1607.62	1607.62	1607.62	1.7453	2.57993	3.62477	4.62367
1606.19	0.8747	1606.19	1606.19	1606.19	1606.19	1.77066	2.60696	3.65686	4.65152
1604.76	0.88829	1604.76	1604.76	1604.76	1604.76	1.79349	2.63195	3.68617	4.67739
1603.33	0.89989	1603.33	1603.33	1603.33	1603.33	1.81357	2.65472	3.71216	4.70099
1601.9	0.9098	1601.9	1601.9	1601.9	1601.9	1.83097	2.6753	3.73473	4.72218
1600.48	0.91836	1600.48	1600.48	1600.48	1600.48	1.84582	2.69376	3.75398	4.74088
1599.05	0.92576	1599.05	1599.05	1599.05	1599.05	1.85809	2.70998	3.77007	4.75688
1597.62	0.93201	1597.62	1597.62	1597.62	1597.62	1.86761	2.72364	3.78298	4.76986
1596.19	0.93709	1596.19	1596.19	1596.19	1596.19	1.87424	2.73441	3.79258	4.77952
1594.77	0.94103	1594.77	1594.77	1594.77	1594.77	1.87796	2.74207	3.79879	4.78569
1593.34	0.94385	1593.34	1593.34	1593.34	1593.34	1.8788	2.74654	3.80152	4.78835
1591.91	0.94545	1591.91	1591.91	1591.91	1591.91	1.87675	2.7478	3.80074	4.78753
1590.48	0.94557	1590.48	1590.48	1590.48	1590.48	1.8717	2.74584	3.79642	4.78322
1589.06	0.94381	1589.06	1589.06	1589.06	1589.06	1.86346	2.7404	3.78855	4.77531
1587.63	0.93981	1587.63	1587.63	1587.63	1587.63	1.85181	2.73108	3.77717	4.7637
1586.2	0.93342	1586.2	1586.2	1586.2	1586.2	1.83668	2.71768	3.76251	4.74847
1584.77	0.92468	1584.77	1584.77	1584.77	1584.77	1.81827	2.70032	3.74488	4.72995
1583.34	0.91368	1583.34	1583.34	1583.34	1583.34	1.79688	2.67944	3.72442	4.70853
1581.92	0.90049	1581.92	1581.92	1581.92	1581.92	1.77286	2.6555	3.70116	4.68454
1580.49	0.88518	1580.49	1580.49	1580.49	1580.49	1.74656	2.62899	3.67519	4.65832
1579.06	0.86783	1579.06	1579.06	1579.06	1579.06	1.71834	2.60035	3.64677	4.63021
1577.63	0.84856	1577.63	1577.63	1577.63	1577.63	1.68853	2.56997	3.6164	4.60058
1576.21	0.8275	1576.21	1576.21	1576.21	1576.21	1.65746	2.53827	3.58466	4.56982
1574.78	0.80478	1574.78	1574.78	1574.78	1574.78	1.62543	2.50582	3.55215	4.53832
1573.35	0.78043	1573.35	1573.35	1573.35	1573.35	1.59276	2.47324	3.51918	4.50643
1571.92	0.75428	1571.92	1571.92	1571.92	1571.92	1.55969	2.441	3.48577	4.47435
1570.49	0.7262	1570.49	1570.49	1570.49	1570.49	1.52646	2.40939	3.45199	4.44227
1569.07	0.69633	1569.07	1569.07	1569.07	1569.07	1.49341	2.37859	3.41815	4.41048
1567.64	0.66508	1567.64	1567.64	1567.64	1567.64	1.46095	2.34876	3.38477	4.37943
1566.21	0.63288	1566.21	1566.21	1566.21	1566.21	1.42949	2.32015	3.3525	4.34954
1564.78	0.60007	1564.78	1564.78	1564.78	1564.78	1.39938	2.29305	3.32188	4.32122
1563.36	0.56695	1563.36	1563.36	1563.36	1563.36	1.37088	2.26776	3.29325	4.29475
1561.93	0.53381	1561.93	1561.93	1561.93	1561.93	1.34411	2.24439	3.26683	4.2703
1560.5	0.50099	1560.5	1560.5	1560.5	1560.5	1.3191	2.22286	3.24266	4.24789
1559.07	0.4689	1559.07	1559.07	1559.07	1559.07	1.29583	2.20306	3.22061	4.22757
1557.65	0.43792	1557.65	1557.65	1557.65	1557.65	1.27432	2.18499	3.2006	4.2094
1556.22	0.40828	1556.22	1556.22	1556.22	1556.22	1.25461	2.16872	3.18239	4.19336
1554.79	0.38007	1554.79	1554.79	1554.79	1554.79	1.23677	2.1543	3.1658	4.17928
1553.36	0.35343	1553.36	1553.36	1553.36	1553.36	1.22104	2.14172	3.15084	4.16694
1551.93	0.32877	1551.93	1551.93	1551.93	1551.93	1.20773	2.1309	3.13776	4.15624
1550.51	0.30656	1550.51	1550.51	1550.51	1550.51	1.19706	2.12173	3.12688	4.14716
1549.08	0.28718	1549.08	1549.08	1549.08	1549.08	1.18896	2.11407	3.11827	4.13961
1547.65	0.27082	1547.65	1547.65	1547.65	1547.65	1.18327	2.10784	3.11171	4.13348
1546.22	0.2574	1546.22	1546.22	1546.22	1546.22	1.17979	2.10305	3.10671	4.12868
1544.8	0.24667	1544.8	1544.8	1544.8	1544.8	1.17835	2.09963	3.10272	4.12504
1543.37	0.23836	1543.37	1543.37	1543.37	1543.37	1.17874	2.09736	3.09942	4.12244
1541.94	0.23245	1541.94	1541.94	1541.94	1541.94	1.18078	2.09602	3.09691	4.12087
1540.51	0.22914	1540.51	1540.51	1540.51	1540.51	1.18439	2.09546	3.09558	4.12045
1539.08	0.22863	1539.08	1539.08	1539.08	1539.08	1.18954	2.09561	3.09571	4.12132
1537.66	0.23085	1537.66	1537.66	1537.66	1537.66	1.19619	2.09646	3.09732	4.12352
1536.23	0.23557	1536.23	1536.23	1536.23	1536.23	1.20425	2.09802	3.10015	4.127
1534.8	0.2425	1534.8	1534.8	1534.8	1534.8	1.21366	2.10033	3.1038	4.13171
1533.37	0.25143	1533.37	1533.37	1533.37	1533.37	1.22434	2.10345	3.10792	4.13758
1531.95	0.26214	1531.95	1531.95	1531.95	1531.95	1.23615	2.10733	3.11228	4.14448
1530.52	0.27437	1530.52	1530.52	1530.52	1530.52	1.2488	2.11186	3.11674	4.15223
1529.09	0.28784	1529.09	1529.09	1529.09	1529.09	1.26204	2.11698	3.12129	4.16059
1527.66	0.3023	1527.66	1527.66	1527.66	1527.66	1.27572	2.12268	3.12615	4.16938
1526.24	0.31763	1526.24	1526.24	1526.24	1526.24	1.28991	2.12902	3.13152	4.17848
1524.81	0.33371	1524.81	1524.81	1524.81	1524.81	1.30465	2.13596	3.13749	4.18781
1523.38	0.35035	1523.38	1523.38	1523.38	1523.38	1.31974	2.14326	3.14385	4.19719
1521.95	0.36722	1521.95	1521.95	1521.95	1521.95	1.33477	2.15066	3.15015	4.2064
1520.52	0.38408	1520.52	1520.52	1520.52	1520.52	1.34959	2.15808	3.15603	4.21536
1519.1	0.40113	1519.1	1519.1	1519.1	1519.1	1.36458	2.16576	3.16161	4.22443
1517.67	0.41882	1517.67	1517.67	1517.67	1517.67	1.38044	2.17409	3.1675	4.23423
1516.24	0.43759	1516.24	1516.24	1516.24	1516.24	1.39755	2.18333	3.17448	4.24527
1514.81	0.4576	1514.81	1514.81	1514.81	1514.81	1.41591	2.19353	3.18301	4.25781
1513.39	0.47876	1513.39	1513.39	1513.39	1513.39	1.4353	2.20469	3.19327	4.27194
1511.96	0.50099	1511.96	1511.96	1511.96	1511.96	1.45572	2.2169	3.20517	4.28781
1510.53	0.52427	1510.53	1510.53	1510.53	1510.53	1.47737	2.23045	3.2187	4.30572
1509.1	0.54869	1509.1	1509.1	1509.1	1509.1	1.50068	2.24583	3.23402	4.32605
1507.67	0.57435	1507.67	1507.67	1507.67	1507.67	1.526	2.2635	3.25143	4.34912
1506.25	0.60126	1506.25	1506.25	1506.25	1506.25	1.55344	2.28377	3.27129	4.375
1504.82	0.62926	1504.82	1504.82	1504.82	1504.82	1.58277	2.30666	3.29391	4.40354
1503.39	0.65802	1503.39	1503.39	1503.39	1503.39	1.61356	2.33212	3.3196	4.43442
1501.96	0.68711	1501.96	1501.96	1501.96	1501.96	1.6453	2.36002	3.34857	4.46733
1500.54	0.71615	1500.54	1500.54	1500.54	1500.54	1.67753	2.39021	3.38085	4.5019
1499.11	0.74473	1499.11	1499.11	1499.11	1499.11	1.70969	2.42245	3.41608	4.53768
1497.68	0.77241	1497.68	1497.68	1497.68	1497.68	1.74115	2.45636	3.4536	4.5741
1496.25	0.79868	1496.25	1496.25	1496.25	1496.25	1.77124	2.49139	3.49245	4.61044
1494.83	0.82303	1494.83	1494.83	1494.83	1494.83	1.79937	2.52687	3.5317	4.64593
1493.4	0.84512	1493.4	1493.4	1493.4	1493.4	1.82519	2.5621	3.57059	4.67991
1491.97	0.86485	1491.97	1491.97	1491.97	1491.97	1.8487	2.59633	3.6087	4.71188
1490.54	0.8822	1490.54	1490.54	1490.54	1490.54	1.8698	2.62864	3.64554	4.74129
1489.11	0.89686	1489.11	1489.11	1489.11	1489.11	1.88785	2.65783	3.68008	4.76726
1487.69	0.90815	1487.69	1487.69	1487.69	1487.69	1.90163	2.68232	3.71053	4.78839
1486.26	0.9152	1486.26	1486.26	1486.26	1486.26	1.90966	2.70041	3.73454	4.80307
1484.83	0.91714	1484.83	1484.83	1484.83	1484.83	1.91071	2.71052	3.74993	4.80977
1483.4	0.91334	1483.4	1483.4	1483.4	1483.4	1.90406	2.71165	3.75535	4.8076
1481.98	0.90352	1481.98	1481.98	1481.98	1481.98	1.88967	2.70359	3.7507	4.79649
1480.55	0.88785	1480.55	1480.55	1480.55	1480.55	1.86811	2.68694	3.7369	4.77706
1479.12	0.8668	1479.12	1479.12	1479.12	1479.12	1.84034	2.66281	3.71527	4.7504
1477.69	0.84131	1477.69	1477.69	1477.69	1477.69	1.80765	2.63262	3.68725	4.7178
1476.27	0.81263	1476.27	1476.27	1476.27	1476.27	1.77147	2.59794	3.65428	4.68074
1474.84	0.78209	1474.84	1474.84	1474.84	1474.84	1.73317	2.56031	3.61773	4.64069
1473.41	0.75078	1473.41	1473.41	1473.41	1473.41	1.69388	2.52113	3.57887	4.59902
1471.98	0.71954	1471.98	1471.98	1471.98	1471.98	1.6545	2.48171	3.53874	4.55699
1470.55	0.68916	1470.55	1470.55	1470.55	1470.55	1.61608	2.44338	3.49856	4.5159
1469.13	0.6607	1469.13	1469.13	1469.13	1469.13	1.58003	2.40767	3.46001	4.47736
1467.7	0.6354	1467.7	1467.7	1467.7	1467.7	1.548	2.37614	3.42509	4.4431
1466.27	0.61449	1466.27	1466.27	1466.27	1466.27	1.5215	2.35006	3.39563	4.41463
1464.84	0.5989	1464.84	1464.84	1464.84	1464.84	1.50158	2.33021	3.37292	4.39297
1463.42	0.58915	1463.42	1463.42	1463.42	1463.42	1.48873	2.31685	3.35751	4.37856
1461.99	0.58522	1461.99	1461.99	1461.99	1461.99	1.48284	2.30975	3.34907	4.37123
1460.56	0.58664	1460.56	1460.56	1460.56	1460.56	1.48327	2.30832	3.3467	4.37027
1459.13	0.59267	1459.13	1459.13	1459.13	1459.13	1.48902	2.31165	3.34921	4.37463
1457.7	0.60237	1457.7	1457.7	1457.7	1457.7	1.49894	2.31868	3.35546	4.38309
1456.28	0.61484	1456.28	1456.28	1456.28	1456.28	1.51196	2.3285	3.36475	4.39464
1454.85	0.6294	1454.85	1454.85	1454.85	1454.85	1.52742	2.34061	3.37699	4.40879
1453.42	0.64562	1453.42	1453.42	1453.42	1453.42	1.54499	2.35495	3.39237	4.42541
1451.99	0.66322	1451.99	1451.99	1451.99	1451.99	1.56458	2.37163	3.41087	4.44451
1450.57	0.68213	1450.57	1450.57	1450.57	1450.57	1.5862	2.39088	3.43233	4.46608
1449.14	0.70233	1449.14	1449.14	1449.14	1449.14	1.60991	2.41286	3.45647	4.49007
1447.71	0.7237	1447.71	1447.71	1447.71	1447.71	1.63547	2.43751	3.48298	4.51624
1446.28	0.74574	1446.28	1446.28	1446.28	1446.28	1.66216	2.46434	3.5112	4.54404
1444.86	0.76769	1444.86	1444.86	1444.86	1444.86	1.68905	2.4927	3.54031	4.57272
1443.43	0.78898	1443.43	1443.43	1443.43	1443.43	1.71545	2.52208	3.56961	4.60174
1442	0.8094	1442	1442	1442	1442	1.74115	2.55227	3.59888	4.63092
1440.57	0.82905	1440.57	1440.57	1440.57	1440.57	1.76627	2.58325	3.62831	4.66032
1439.14	0.84805	1439.14	1439.14	1439.14	1439.14	1.79087	2.61491	3.65806	4.6899
1437.72	0.86633	1437.72	1437.72	1437.72	1437.72	1.81483	2.64695	3.68809	4.71943
1436.29	0.88374	1436.29	1436.29	1436.29	1436.29	1.83792	2.679	3.7182	4.74854
1434.86	0.90009	1434.86	1434.86	1434.86	1434.86	1.85992	2.71065	3.748	4.77687
1433.43	0.91518	1433.43	1433.43	1433.43	1433.43	1.88059	2.74158	3.77697	4.80405
1432.01	0.92888	1432.01	1432.01	1432.01	1432.01	1.89973	2.77159	3.80462	4.82979
1430.58	0.94115	1430.58	1430.58	1430.58	1430.58	1.91722	2.80052	3.83061	4.85389
1429.15	0.95202	1429.15	1429.15	1429.15	1429.15	1.9329	2.82816	3.85478	4.87621
1427.72	0.96151	1427.72	1427.72	1427.72	1427.72	1.94669	2.85418	3.87705	4.89661
1426.29	0.96957	1426.29	1426.29	1426.29	1426.29	1.95853	2.87814	3.89739	4.91488
1424.87	0.97613	1424.87	1424.87	1424.87	1424.87	1.96837	2.89978	3.91568	4.93096
1423.44	0.98119	1423.44	1423.44	1423.44	1423.44	1.9763	2.91898	3.93192	4.94489
1422.01	0.985	1422.01	1422.01	1422.01	1422.01	1.98264	2.93592	3.94625	4.95686
1420.58	0.98792	1420.58	1420.58	1420.58	1420.58	1.98778	2.95084	3.95879	4.96717
1419.16	0.99024	1419.16	1419.16	1419.16	1419.16	1.99193	2.96378	3.96949	4.97593
1417.73	0.992	1417.73	1417.73	1417.73	1417.73	1.99503	2.97453	3.97805	4.98301
1416.3	0.99319	1416.3	1416.3	1416.3	1416.3	1.99695	2.98283	3.98427	4.98822
1414.87	0.99377	1414.87	1414.87	1414.87	1414.87	1.99759	2.98853	3.98817	4.99145
1413.45	0.99371	1413.45	1413.45	1413.45	1413.45	1.99686	2.99156	3.98995	4.9926
1412.02	0.99303	1412.02	1412.02	1412.02	1412.02	1.99469	2.99185	3.98977	4.99157
1410.59	0.99176	1410.59	1410.59	1410.59	1410.59	1.99101	2.98936	3.98778	4.98829
1409.16	0.98991	1409.16	1409.16	1409.16	1409.16	1.98578	2.98404	3.98384	4.98271
1407.73	0.98738	1407.73	1407.73	1407.73	1407.73	1.9788	2.97559	3.97748	4.97462
1406.31	0.98383	1406.31	1406.31	1406.31	1406.31	1.96968	2.96347	3.96776	4.96352
1404.88	0.97875	1404.88	1404.88	1404.88	1404.88	1.95785	2.94702	3.95355	4.94874
1403.45	0.97147	1403.45	1403.45	1403.45	1403.45	1.94265	2.92561	3.93384	4.92955
1402.02	0.9614	1402.02	1402.02	1402.02	1402.02	1.92332	2.89869	3.90802	4.90528
1400.6	0.94818	1400.6	1400.6	1400.6	1400.6	1.89944	2.866	3.87608	4.8756
1399.17	0.93187	1399.17	1399.17	1399.17	1399.17	1.87143	2.82788	3.83885	4.8409
1397.74	0.91309	1397.74	1397.74	1397.74	1397.74	1.84048	2.78553	3.79786	4.80246
1396.31	0.89289	1396.31	1396.31	1396.31	1396.31	1.80836	2.74091	3.75511	4.76232
1394.88	0.8725	1394.88	1394.88	1394.88	1394.88	1.77698	2.69637	3.71267	4.72275
1393.46	0.85323	1393.46	1393.46	1393.46	1393.46	1.74814	2.65439	3.67261	4.68601
1392.03	0.83615	1392.03	1392.03	1392.03	1392.03	1.72336	2.61728	3.63693	4.65406
1390.6	0.82218	1390.6	1390.6	1390.6	1390.6	1.70386	2.58698	3.60761	4.6285
1389.17	0.81202	1389.17	1389.17	1389.17	1389.17	1.69051	2.56482	3.58642	4.61049
1387.75	0.8061	1387.75	1387.75	1387.75	1387.75	1.6837	2.55146	3.57446	4.60059
1386.32	0.80433	1386.32	1386.32	1386.32	1386.32	1.68314	2.54662	3.5717	4.59854
1384.89	0.80612	1384.89	1384.89	1384.89	1384.89	1.68776	2.54909	3.57671	4.6031
1383.46	0.8103	1383.46	1383.46	1383.46	1383.46	1.69569	2.55677	3.58685	4.61215
1382.04	0.81535	1382.04	1382.04	1382.04	1382.04	1.70462	2.56697	3.59873	4.62297
1380.61	0.81969	1380.61	1380.61	1380.61	1380.61	1.7122	2.57675	3.6089	4.63276
1379.18	0.82207	1379.18	1379.18	1379.18	1379.18	1.7166	2.58342	3.61457	4.6391
1377.75	0.82178	1377.75	1377.75	1377.75	1377.75	1.71682	2.58507	3.61398	4.64047
1376.32	0.8185	1376.32	1376.32	1376.32	1376.32	1.71272	2.58097	3.60678	4.63645
1374.9	0.81204	1374.9	1374.9	1374.9	1374.9	1.70472	2.57149	3.5939	4.62762
1373.47	0.80246	1373.47	1373.47	1373.47	1373.47	1.69374	2.5579	3.57713	4.61528
1372.04	0.79041	1372.04	1372.04	1372.04	1372.04	1.68124	2.54207	3.55875	4.60128
1370.61	0.77733	1370.61	1370.61	1370.61	1370.61	1.66924	2.52625	3.5412	4.5878
1369.19	0.76514	1369.19	1369.19	1369.19	1369.19	1.65989	2.51275	3.52671	4.57708
1367.76	0.75562	1367.76	1367.76	1367.76	1367.76	1.65488	2.5035	3.51713	4.57097
1366.33	0.75001	1366.33	1366.33	1366.33	1366.33	1.65529	2.49995	3.514	4.57075
1364.9	0.74891	1364.9	1364.9	1364.9	1364.9	1.6616	2.50305	3.51856	4.57711
1363.47	0.7525	1363.47	1363.47	1363.47	1363.47	1.67391	2.51318	3.5315	4.5902
1362.05	0.76075	1362.05	1362.05	1362.05	1362.05	1.69196	2.53013	3.55273	4.60964
1360.62	0.7733	1360.62	1360.62	1360.62	1360.62	1.71493	2.55296	3.58106	4.63449
1359.19	0.7888	1359.19	1359.19	1359.19	1359.19	1.74098	2.57977	3.61428	4.66298
1357.76	0.80445	1357.76	1357.76	1357.76	1357.76	1.76698	2.60773	3.64937	4.69247
1356.34	0.81653	1356.34	1356.34	1356.34	1356.34	1.78915	2.63358	3.683	4.71988
1354.91	0.82214	1354.91	1354.91	1354.91	1354.91	1.80452	2.65463	3.71217	4.74248
1353.48	0.82086	1353.48	1353.48	1353.48	1353.48	1.81214	2.66954	3.73476	4.7587
1352.05	0.81465	1352.05	1352.05	1352.05	1352.05	1.81321	2.67852	3.74997	4.76847
1350.63	0.80644	1350.63	1350.63	1350.63	1350.63	1.8101	2.68282	3.75832	4.77289
1349.2	0.79858	1349.2	1349.2	1349.2	1349.2	1.80522	2.68412	3.76127	4.77367
1347.77	0.79242	1347.77	1347.77	1347.77	1347.77	1.8004	2.68414	3.76069	4.77265
1346.34	0.78862	1346.34	1346.34	1346.34	1346.34	1.79687	2.68439	3.75835	4.77137
1344.91	0.78758	1344.91	1344.91	1344.91	1344.91	1.79531	2.68596	3.75545	4.77082
1343.49	0.78976	1343.49	1343.49	1343.49	1343.49	1.79606	2.68937	3.75266	4.77141
1342.06	0.79549	1342.06	1342.06	1342.06	1342.06	1.79927	2.69463	3.75024	4.7732
1340.63	0.80482	1340.63	1340.63	1340.63	1340.63	1.80486	2.70131	3.74829	4.77605
1339.2	0.81736	1339.2	1339.2	1339.2	1339.2	1.81258	2.70877	3.74689	4.77966
1337.78	0.83246	1337.78	1337.78	1337.78	1337.78	1.82199	2.71633	3.74594	4.78372
1336.35	0.84948	1336.35	1336.35	1336.35	1336.35	1.83266	2.72351	3.74522	4.78793
1334.92	0.86779	1334.92	1334.92	1334.92	1334.92	1.84413	2.73005	3.74439	4.79204
1333.49	0.88663	1333.49	1333.49	1333.49	1333.49	1.85582	2.73576	3.7432	4.79589
1332.07	0.90463	1332.07	1332.07	1332.07	1332.07	1.86681	2.74039	3.7416	4.79929
1330.64	0.91964	1330.64	1330.64	1330.64	1330.64	1.8758	2.7435	3.73985	4.802
1329.21	0.92942	1329.21	1329.21	1329.21	1329.21	1.88153	2.74479	3.73842	4.80383
1327.78	0.93311	1327.78	1327.78	1327.78	1327.78	1.8837	2.74453	3.73782	4.80494
1326.35	0.93211	1326.35	1326.35	1326.35	1326.35	1.88341	2.74385	3.73845	4.80596
1324.93	0.92935	1324.93	1324.93	1324.93	1324.93	1.88262	2.74427	3.74062	4.80777
1323.5	0.92743	1323.5	1323.5	1323.5	1323.5	1.88296	2.74695	3.74447	4.81102
1322.07	0.92733	1322.07	1322.07	1322.07	1322.07	1.885	2.75211	3.75006	4.81586
1320.64	0.92869	1320.64	1320.64	1320.64	1320.64	1.88847	2.7592	3.7573	4.82197
1319.22	0.93068	1319.22	1319.22	1319.22	1319.22	1.89277	2.76742	3.76604	4.82888
1317.79	0.93262	1317.79	1317.79	1317.79	1317.79	1.89733	2.77603	3.77602	4.83609
1316.36	0.9341	1316.36	1316.36	1316.36	1316.36	1.90167	2.78446	3.78683	4.84312
1314.93	0.93491	1314.93	1314.93	1314.93	1314.93	1.9053	2.79218	3.79793	4.84954
1313.5	0.93499	1313.5	1313.5	1313.5	1313.5	1.90786	2.79865	3.80859	4.85498
1312.08	0.93431	1312.08	1312.08	1312.08	1312.08	1.90909	2.80331	3.81804	4.85915
1310.65	0.93288	1310.65	1310.65	1310.65	1310.65	1.90883	2.80571	3.82553	4.8618
1309.22	0.93066	1309.22	1309.22	1309.22	1309.22	1.90709	2.80562	3.83057	4.86276
1307.79	0.92769	1307.79	1307.79	1307.79	1307.79	1.90396	2.80311	3.83292	4.86193
1306.37	0.92401	1306.37	1306.37	1306.37	1306.37	1.89965	2.79848	3.83264	4.8593
1304.94	0.91974	1304.94	1304.94	1304.94	1304.94	1.89434	2.79205	3.82991	4.8549
1303.51	0.91505	1303.51	1303.51	1303.51	1303.51	1.88819	2.78407	3.82494	4.84886
1302.08	0.91004	1302.08	1302.08	1302.08	1302.08	1.8813	2.7747	3.81787	4.84131
1300.66	0.90472	1300.66	1300.66	1300.66	1300.66	1.8737	2.76414	3.80879	4.83247
1299.23	0.89893	1299.23	1299.23	1299.23	1299.23	1.86537	2.7527	3.79786	4.82258
1297.8	0.89237	1297.8	1297.8	1297.8	1297.8	1.85622	2.74072	3.78534	4.81187
1296.37	0.88463	1296.37	1296.37	1296.37	1296.37	1.8461	2.72844	3.77172	4.80051
1294.94	0.87529	1294.94	1294.94	1294.94	1294.94	1.83485	2.71591	3.75754	4.78862
1293.52	0.86411	1293.52	1293.52	1293.52	1293.52	1.82239	2.70299	3.74335	4.77631
1292.09	0.85123	1292.09	1292.09	1292.09	1292.09	1.80882	2.68956	3.72952	4.76372
1290.66	0.83718	1290.66	1290.66	1290.66	1290.66	1.79447	2.67568	3.71617	4.75107
1289.23	0.82273	1289.23	1289.23	1289.23	1289.23	1.77984	2.66168	3.70322	4.73867
1287.81	0.80878	1287.81	1287.81	1287.81	1287.81	1.76554	2.64808	3.69046	4.72684
1286.38	0.7961	1286.38	1286.38	1286.38	1286.38	1.75216	2.63536	3.67779	4.71586
1284.95	0.78538	1284.95	1284.95	1284.95	1284.95	1.74024	2.62392	3.66529	4.706
1283.52	0.77715	1283.52	1283.52	1283.52	1283.52	1.73022	2.61393	3.65328	4.6974
1282.09	0.77181	1282.09	1282.09	1282.09	1282.09	1.72243	2.60548	3.64218	4.69013
1280.67	0.76963	1280.67	1280.67	1280.67	1280.67	1.71712	2.59865	3.63237	4.68418
1279.24	0.77065	1279.24	1279.24	1279.24	1279.24	1.71437	2.59352	3.62395	4.67947
1277.81	0.77463	1277.81	1277.81	1277.81	1277.81	1.71415	2.5901	3.61672	4.67584
1276.38	0.78105	1276.38	1276.38	1276.38	1276.38	1.71627	2.58825	3.61022	4.67313
1274.96	0.78917	1274.96	1274.96	1274.96	1274.96	1.72036	2.58763	3.60395	4.67114
1273.53	0.79818	1273.53	1273.53	1273.53	1273.53	1.72589	2.5878	3.59768	4.66969
1272.1	0.80731	1272.1	1272.1	1272.1	1272.1	1.73224	2.58829	3.59145	4.6686
1270.67	0.81587	1270.67	1270.67	1270.67	1270.67	1.73874	2.5887	3.58563	4.66771
1269.25	0.82321	1269.25	1269.25	1269.25	1269.25	1.74473	2.58872	3.58066	4.66689
1267.82	0.82878	1267.82	1267.82	1267.82	1267.82	1.74967	2.58814	3.57686	4.66605
1266.39	0.83221	1266.39	1266.39	1266.39	1266.39	1.7532	2.58678	3.5743	4.66516
1264.96	0.83338	1264.96	1264.96	1264.96	1264.96	1.75523	2.58457	3.57273	4.66423
1263.53	0.83259	1263.53	1263.53	1263.53	1263.53	1.75596	2.58159	3.57179	4.66335
1262.11	0.83044	1262.11	1262.11	1262.11	1262.11	1.75576	2.57811	3.57112	4.66262
1260.68	0.82767	1260.68	1260.68	1260.68	1260.68	1.75507	2.57455	3.5706	4.66212
1259.25	0.8249	1259.25	1259.25	1259.25	1259.25	1.75422	2.57128	3.57039	4.66186
1257.82	0.82239	1257.82	1257.82	1257.82	1257.82	1.75329	2.56852	3.57071	4.66177
1256.4	0.81992	1256.4	1256.4	1256.4	1256.4	1.7521	2.56623	3.57178	4.6617
1254.97	0.81714	1254.97	1254.97	1254.97	1254.97	1.75045	2.56429	3.57354	4.66148
1253.54	0.81385	1253.54	1253.54	1253.54	1253.54	1.74831	2.56264	3.57567	4.66105
1252.11	0.8102	1252.11	1252.11	1252.11	1252.11	1.74592	2.56138	3.57759	4.66046
1250.68	0.80653	1250.68	1250.68	1250.68	1250.68	1.74361	2.56067	3.57872	4.65982
1249.26	0.80317	1249.26	1249.26	1249.26	1249.26	1.74157	2.56061	3.57867	4.65922
1247.83	0.80031	1247.83	1247.83	1247.83	1247.83	1.73985	2.56115	3.57735	4.65875
1246.4	0.7981	1246.4	1246.4	1246.4	1246.4	1.73844	2.56212	3.57501	4.65844
1244.97	0.79663	1244.97	1244.97	1244.97	1244.97	1.73734	2.56334	3.57202	4.65836
1243.55	0.79598	1243.55	1243.55	1243.55	1243.55	1.73665	2.56469	3.56875	4.65856
1242.12	0.79625	1242.12	1242.12	1242.12	1242.12	1.7365	2.56614	3.56537	4.6591
1240.69	0.79758	1240.69	1240.69	1240.69	1240.69	1.73709	2.5677	3.56181	4.65999
1239.26	0.80009	1239.26	1239.26	1239.26	1239.26	1.73855	2.56937	3.55786	4.66121
1237.84	0.80391	1237.84	1237.84	1237.84	1237.84	1.74093	2.57115	3.55339	4.6627
1236.41	0.8091	1236.41	1236.41	1236.41	1236.41	1.74426	2.57301	3.54842	4.66438
1234.98	0.81556	1234.98	1234.98	1234.98	1234.98	1.74845	2.57497	3.54322	4.66614
1233.55	0.82302	1233.55	1233.55	1233.55	1233.55	1.75336	2.57705	3.53822	4.66791
1232.12	0.83099	1232.12	1232.12	1232.12	1232.12	1.75875	2.57926	3.53382	4.66955
1230.7	0.83878	1230.7	1230.7	1230.7	1230.7	1.76421	2.5815	3.53021	4.67094
1229.27	0.84573	1229.27	1229.27	1229.27	1229.27	1.76927	2.58356	3.52733	4.67196
1227.84	0.8514	1227.84	1227.84	1227.84	1227.84	1.77358	2.58522	3.52486	4.67256
1226.41	0.85584	1226.41	1226.41	1226.41	1226.41	1.77709	2.5864	3.52248	4.67283
1224.99	0.85939	1224.99	1224.99	1224.99	1224.99	1.77999	2.58724	3.51994	4.67294
1223.56	0.86238	1223.56	1223.56	1223.56	1223.56	1.78253	2.58791	3.51721	4.67312
1222.13	0.8649	1222.13	1222.13	1222.13	1222.13	1.78476	2.58853	3.5145	4.6735
1220.7	0.86683	1220.7	1220.7	1220.7	1220.7	1.78658	2.58914	3.51213	4.67414
1219.28	0.86807	1219.28	1219.28	1219.28	1219.28	1.78787	2.58969	3.5104	4.67507
1217.85	0.86873	1217.85	1217.85	1217.85	1217.85	1.78861	2.59019	3.50947	4.6763
1216.42	0.86911	1216.42	1216.42	1216.42	1216.42	1.78894	2.5907	3.50923	4.67777
1214.99	0.86955	1214.99	1214.99	1214.99	1214.99	1.78904	2.59135	3.50946	4.67946
1213.56	0.87027	1213.56	1213.56	1213.56	1213.56	1.78913	2.59225	3.50988	4.68125
1212.14	0.87123	1212.14	1212.14	1212.14	1212.14	1.78939	2.59346	3.51028	4.68303
1210.71	0.87228	1210.71	1210.71	1210.71	1210.71	1.78992	2.59494	3.51064	4.68466
1209.28	0.87323	1209.28	1209.28	1209.28	1209.28	1.79078	2.59658	3.51113	4.68607
1207.85	0.87395	1207.85	1207.85	1207.85	1207.85	1.79188	2.59825	3.51195	4.68718
1206.43	0.87446	1206.43	1206.43	1206.43	1206.43	1.79305	2.59985	3.51322	4.68795
1205	0.8748	1205	1205	1205	1205	1.79404	2.60127	3.51486	4.68833
1203.57	0.875	1203.57	1203.57	1203.57	1203.57	1.79455	2.60237	3.51657	4.68826
1202.14	0.875	1202.14	1202.14	1202.14	1202.14	1.79435	2.60294	3.51791	4.68769
1200.71	0.87461	1200.71	1200.71	1200.71	1200.71	1.79329	2.60268	3.51835	4.68654
1199.29	0.87362	1199.29	1199.29	1199.29	1199.29	1.7913	2.6013	3.5175	4.68473
1197.86	0.87185	1197.86	1197.86	1197.86	1197.86	1.78841	2.59857	3.51513	4.68216
1196.43	0.86926	1196.43	1196.43	1196.43	1196.43	1.78468	2.5944	3.51125	4.67874
1195	0.86594	1195	1195	1195	1195	1.78018	2.58883	3.50611	4.67434
1193.58	0.86205	1193.58	1193.58	1193.58	1193.58	1.77486	2.58185	3.49992	4.66878
1192.15	0.85757	1192.15	1192.15	1192.15	1192.15	1.76847	2.57336	3.49267	4.66179
1190.72	0.85229	1190.72	1190.72	1190.72	1190.72	1.7606	2.56317	3.48409	4.65301
1189.29	0.84588	1189.29	1189.29	1189.29	1189.29	1.75082	2.55104	3.47371	4.64205
1187.87	0.83795	1187.87	1187.87	1187.87	1187.87	1.73876	2.53685	3.46103	4.62862
1186.44	0.82827	1186.44	1186.44	1186.44	1186.44	1.72428	2.52068	3.44576	4.61262
1185.01	0.81689	1185.01	1185.01	1185.01	1185.01	1.70758	2.50281	3.42803	4.59422
1183.58	0.8042	1183.58	1183.58	1183.58	1183.58	1.68926	2.48377	3.40845	4.574
1182.15	0.79096	1182.15	1182.15	1182.15	1182.15	1.67033	2.46432	3.38819	4.55297
1180.73	0.77807	1180.73	1180.73	1180.73	1180.73	1.65206	2.44547	3.3688	4.53248
1179.3	0.76643	1179.3	1179.3	1179.3	1179.3	1.6358	2.42843	3.35196	4.51409
1177.87	0.75673	1177.87	1177.87	1177.87	1177.87	1.62269	2.41442	3.3392	4.49925
1176.44	0.74935	1176.44	1176.44	1176.44	1176.44	1.61344	2.4044	3.33146	4.48901
1175.02	0.74447	1175.02	1175.02	1175.02	1175.02	1.60821	2.39885	3.32908	4.48385
1173.59	0.74204	1173.59	1173.59	1173.59	1173.59	1.60682	2.39772	3.33192	4.48373
1172.16	0.74194	1172.16	1172.16	1172.16	1172.16	1.60885	2.40051	3.33962	4.48818
1170.73	0.74387	1170.73	1170.73	1170.73	1170.73	1.61384	2.40648	3.35178	4.49646
1169.3	0.74736	1169.3	1169.3	1169.3	1169.3	1.62134	2.4148	3.36803	4.5077
1167.88	0.7516	1167.88	1167.88	1167.88	1167.88	1.63073	2.42467	3.38793	4.52092
1166.45	0.75547	1166.45	1166.45	1166.45	1166.45	1.64115	2.4352	3.41089	4.53507
1165.02	0.7576	1165.02	1165.02	1165.02	1165.02	1.65146	2.44542	3.43604	4.54907
1163.59	0.75679	1163.59	1163.59	1163.59	1163.59	1.66033	2.4543	3.46226	4.56189
1162.17	0.75232	1162.17	1162.17	1162.17	1162.17	1.66663	2.46092	3.48843	4.57272
1160.74	0.74407	1160.74	1160.74	1160.74	1160.74	1.66962	2.46463	3.51367	4.58107
1159.31	0.73234	1159.31	1159.31	1159.31	1159.31	1.66903	2.46518	3.53749	4.58678
1157.88	0.71771	1157.88	1157.88	1157.88	1157.88	1.6651	2.46276	3.55996	4.59009
1156.46	0.70098	1156.46	1156.46	1156.46	1156.46	1.65863	2.45797	3.58156	4.5916
1155.03	0.68333	1155.03	1155.03	1155.03	1155.03	1.65094	2.45174	3.60302	4.59228
1153.6	0.66618	1153.6	1153.6	1153.6	1153.6	1.64368	2.44518	3.62501	4.59326
1152.17	0.65098	1152.17	1152.17	1152.17	1152.17	1.63835	2.43929	3.64782	4.59553
1150.74	0.63889	1150.74	1150.74	1150.74	1150.74	1.63586	2.4348	3.67113	4.59956
1149.32	0.63045	1149.32	1149.32	1149.32	1149.32	1.63616	2.43187	3.69372	4.60504
1147.89	0.62546	1147.89	1147.89	1147.89	1147.89	1.63821	2.43007	3.71361	4.61085
1146.46	0.62312	1146.46	1146.46	1146.46	1146.46	1.64039	2.42848	3.72844	4.6154
1145.03	0.62243	1145.03	1145.03	1145.03	1145.03	1.64108	2.42601	3.73623	4.61708
[truncated: 522 more rows]

## Sheet: Fig2b
1	1.5544	1.8687	0.08845	0.04635
2	1.4823	1.8352	0.09451	0.06326
3	0.76202	1.22838	0.0541	0.07017
4	0.2043	0.2419	0.0864	0.094
5	0.1977	0.2151	0.0515	0.02588
6	0.11002	0.1659	0.0485	0.04513
7	0.08884	0.17755	0.0351	0.0358

## Sheet: Fig2c
1	96.07	3.116	94.131	2.597
2	95.49	1.777	94.091	1.77
3	91.56	4.05	91.058	0.99
4	51.028	1.1	54.352	1.28
5	44.84	2.13	49.123	3.49
6	38.27	2.85	39.142	4.12
7	27.82	1.88	32.979	1.745

## Sheet: Fig2d
850	99.7	850	87.6	850	72	850	0.1	850	0.1	850	0	850	0
849.5	100	849.5	87.8	849.5	72	849.5	0.1	849.5	0.1	849.5	0.1	849.5	0
849	99.9	849	87.8	849	72.1	849	0.1	849	0.1	849	0.1	849	0
848.5	99.7	848.5	87.8	848.5	72.1	848.5	0.1	848.5	0.1	848.5	0.1	848.5	0
848	100.1	848	88.1	848	72	848	0.1	848	0.1	848	0.1	848	0
847.5	100.3	847.5	88.2	847.5	72	847.5	0.1	847.5	0.1	847.5	0.1	847.5	0
847	100.6	847	88.1	847	71.9	847	0.1	847	0.1	847	0.1	847	0
846.5	100.7	846.5	88.1	846.5	71.8	846.5	0.1	846.5	0.1	846.5	0.1	846.5	0
846	100.6	846	87.7	846	71.7	846	0.1	846	0.1	846	0.1	846	0
845.5	100.4	845.5	87.8	845.5	71.6	845.5	0.1	845.5	0.1	845.5	0.1	845.5	0
845	100.7	845	88.2	845	71.5	845	0.1	845	0.1	845	0.1	845	0
844.5	100.6	844.5	88.1	844.5	71.3	844.5	0.1	844.5	0.1	844.5	0.1	844.5	0
844	100.5	844	87.9	844	71.2	844	0.1	844	0.1	844	0.1	844	0
843.5	100.5	843.5	87.9	843.5	71.2	843.5	0.1	843.5	0.1	843.5	0.1	843.5	0
843	100.3	843	87.7	843	71.3	843	0.1	843	0.1	843	0.1	843	0
842.5	100.2	842.5	87.7	842.5	71.4	842.5	0.1	842.5	0.1	842.5	0.1	842.5	0
842	100.4	842	87.8	842	71.4	842	0.1	842	0.1	842	0.1	842	0
841.5	100.3	841.5	87.5	841.5	71.3	841.5	0.1	841.5	0.1	841.5	0.1	841.5	0
841	100.3	841	87.5	841	71.2	841	0.1	841	0.1	841	0.1	841	0
840.5	100.3	840.5	87.5	840.5	71.1	840.5	0.1	840.5	0.1	840.5	0.1	840.5	0
840	100.1	840	87.4	840	71	840	0.1	840	0.1	840	0.1	840	0
839.5	99.9	839.5	87.5	839.5	70.9	839.5	0.1	839.5	0.1	839.5	0	839.5	0
839	100.1	839	87.4	839	70.8	839	0.1	839	0.1	839	0	839	0
838.5	100.3	838.5	87.4	838.5	70.8	838.5	0.1	838.5	0.1	838.5	0.1	838.5	0
838	100.5	838	87.6	838	70.8	838	0.1	838	0.1	838	0.1	838	0
837.5	100.4	837.5	87.5	837.5	70.8	837.5	0.1	837.5	0.1	837.5	0.1	837.5	0
837	100.2	837	87.6	837	70.8	837	0.1	837	0.1	837	0.1	837	0
836.5	100.1	836.5	87.7	836.5	70.8	836.5	0.1	836.5	0.1	836.5	0.1	836.5	0
836	100.3	836	87.5	836	70.7	836	0.1	836	0.1	836	0.1	836	0
835.5	100.5	835.5	87.4	835.5	70.7	835.5	0.1	835.5	0.1	835.5	0.1	835.5	0
835	100.8	835	87.4	835	70.7	835	0.1	835	0.1	835	0.1	835	0
834.5	100.7	834.5	87.3	834.5	70.6	834.5	0.1	834.5	0.1	834.5	0.1	834.5	0
834	100.7	834	87.3	834	70.6	834	0.1	834	0.1	834	0.1	834	0
833.5	100.7	833.5	87.5	833.5	70.5	833.5	0.1	833.5	0.1	833.5	0.1	833.5	0
833	100.8	833	87.5	833	70.4	833	0.1	833	0.1	833	0.1	833	0
832.5	100.9	832.5	87.6	832.5	70.4	832.5	0.1	832.5	0.1	832.5	0.1	832.5	0
832	101	832	87.5	832	70.4	832	0.1	832	0.1	832	0.1	832	0
831.5	100.8	831.5	87.5	831.5	70.4	831.5	0.1	831.5	0.1	831.5	0.1	831.5	0
831	100.9	831	87.5	831	70.4	831	0.1	831	0.1	831	0	831	0
830.5	100.9	830.5	87.7	830.5	70.4	830.5	0.1	830.5	0.1	830.5	0	830.5	0
830	101	830	87.6	830	70.4	830	0.1	830	0.1	830	0	830	0
829.5	101	829.5	87.6	829.5	70.4	829.5	0.1	829.5	0.1	829.5	0	829.5	0
829	101	829	87.4	829	70.3	829	0.1	829	0.1	829	0	829	0
828.5	101	828.5	87.4	828.5	70.2	828.5	0.1	828.5	0.1	828.5	0	828.5	0
828	100.9	828	87.2	828	70.1	828	0.1	828	0.1	828	0	828	0
827.5	100.9	827.5	87.3	827.5	70.1	827.5	0.1	827.5	0.1	827.5	0	827.5	0
827	101	827	87.5	827	70.1	827	0.1	827	0.1	827	0.1	827	0
826.5	101.1	826.5	87.7	826.5	70.2	826.5	0.1	826.5	0.1	826.5	0	826.5	0
826	101.3	826	87.9	826	70.2	826	0.1	826	0.1	826	0	826	0
825.5	101.2	825.5	87.8	825.5	70.2	825.5	0.1	825.5	0.1	825.5	0	825.5	0
825	101.2	825	87.6	825	70.2	825	0.1	825	0.1	825	0	825	0
824.5	101	824.5	87.5	824.5	70.2	824.5	0.1	824.5	0.1	824.5	0	824.5	0
824	101.1	824	87.6	824	70.1	824	0.1	824	0.1	824	0	824	0
823.5	101.2	823.5	87.6	823.5	70	823.5	0.1	823.5	0.1	823.5	0	823.5	0
823	101.6	823	87.6	823	69.9	823	0.1	823	0.1	823	0	823	0
822.5	101.5	822.5	87.6	822.5	69.8	822.5	0.1	822.5	0.1	822.5	0	822.5	0
822	101.5	822	87.6	822	69.7	822	0.1	822	0.1	822	0	822	0
821.5	101.4	821.5	87.5	821.5	69.5	821.5	0.1	821.5	0.1	821.5	0	821.5	0
821	101.5	821	87.5	821	69.4	821	0.1	821	0.1	821	0	821	0
820.5	101.6	820.5	87.4	820.5	69.4	820.5	0.1	820.5	0.1	820.5	0	820.5	0
820	101.6	820	87.2	820	69.4	820	0.1	820	0.1	820	0	820	0
819.5	101.5	819.5	87.2	819.5	69.5	819.5	0.1	819.5	0.1	819.5	0	819.5	0
819	101.4	819	87.2	819	69.5	819	0.1	819	0.1	819	0	819	0
818.5	101.4	818.5	87.3	818.5	69.4	818.5	0.1	818.5	0.1	818.5	0	818.5	0
818	101.4	818	87.4	818	69.3	818	0.1	818	0.1	818	0	818	0
817.5	101.3	817.5	87.3	817.5	69.2	817.5	0.1	817.5	0.1	817.5	0	817.5	0
817	101.1	817	87.1	817	69.2	817	0.1	817	0.1	817	0	817	0
816.5	101	816.5	87	816.5	69.2	816.5	0.1	816.5	0.1	816.5	0	816.5	0
816	100.9	816	87	816	69.2	816	0.1	816	0.1	816	0	816	0
815.5	101.1	815.5	87	815.5	69.2	815.5	0.1	815.5	0.1	815.5	0	815.5	0
815	101.4	815	87.1	815	69.1	815	0.1	815	0.1	815	0	815	0
814.5	101.6	814.5	87.1	814.5	69	814.5	0.1	814.5	0.1	814.5	0	814.5	0
814	101.7	814	87.1	814	68.9	814	0.1	814	0.1	814	0	814	0
813.5	101.7	813.5	87.1	813.5	68.7	813.5	0.1	813.5	0.1	813.5	0	813.5	0
813	101.4	813	87	813	68.7	813	0.1	813	0.1	813	0	813	0
812.5	101.2	812.5	86.8	812.5	68.7	812.5	0.1	812.5	0.1	812.5	0	812.5	0
812	101.1	812	86.6	812	68.7	812	0.1	812	0.1	812	0	812	0
811.5	101	811.5	86.5	811.5	68.7	811.5	0.1	811.5	0.1	811.5	0	811.5	0
811	101.2	811	86.5	811	68.6	811	0.1	811	0.1	811	0	811	0
810.5	101.3	810.5	86.6	810.5	68.5	810.5	0.1	810.5	0.1	810.5	0	810.5	0
810	101.4	810	86.9	810	68.4	810	0.1	810	0.1	810	0	810	0
809.5	101.4	809.5	87	809.5	68.3	809.5	0.1	809.5	0.1	809.5	0	809.5	0
809	101.3	809	86.9	809	68.2	809	0.1	809	0.1	809	0	809	0
808.5	101.2	808.5	86.7	808.5	68.1	808.5	0.1	808.5	0.1	808.5	0	808.5	0
808	101.1	808	86.7	808	68.1	808	0.1	808	0.1	808	0	808	0
807.5	101.2	807.5	86.7	807.5	68	807.5	0.1	807.5	0.1	807.5	0	807.5	0
807	101.3	807	86.7	807	67.9	807	0.1	807	0.1	807	0	807	0
806.5	101.4	806.5	86.6	806.5	67.9	806.5	0.1	806.5	0.1	806.5	0	806.5	0
806	101.3	806	86.5	806	67.8	806	0.1	806	0	806	0	806	0
805.5	101.1	805.5	86.4	805.5	67.7	805.5	0.1	805.5	0	805.5	0	805.5	0
805	101.2	805	86.3	805	67.7	805	0.1	805	0	805	0	805	0
804.5	101.2	804.5	86.4	804.5	67.7	804.5	0.1	804.5	0	804.5	0	804.5	0
804	101	804	86.3	804	67.6	804	0.1	804	0	804	0	804	0
803.5	101	803.5	86.2	803.5	67.6	803.5	0.1	803.5	0	803.5	0	803.5	0
803	100.9	803	86.1	803	67.5	803	0.1	803	0	803	0	803	0
802.5	100.8	802.5	85.8	802.5	67.5	802.5	0.1	802.5	0	802.5	0	802.5	0
802	100.9	802	85.6	802	67.4	802	0.1	802	0	802	0	802	0
801.5	100.8	801.5	85.6	801.5	67.4	801.5	0.1	801.5	0	801.5	0	801.5	0
801	100.6	801	85.5	801	67.4	801	0.1	801	0	801	0	801	0
800.5	100.5	800.5	85.6	800.5	67.3	800.5	0.1	800.5	0	800.5	0	800.5	0
800	100.7	800	85.7	800	67.2	800	0	800	0	800	0	800	0
799.5	100.8	799.5	85.8	799.5	67.1	799.5	0	799.5	0	799.5	0	799.5	0
799	101	799	85.9	799	66.9	799	0	799	0	799	0	799	0
798.5	101	798.5	85.8	798.5	66.8	798.5	0	798.5	0	798.5	0	798.5	0
798	100.8	798	85.6	798	66.7	798	0	798	0	798	0	798	0
797.5	100.7	797.5	85.5	797.5	66.7	797.5	0	797.5	0	797.5	0	797.5	0
797	100.8	797	85.5	797	66.6	797	0	797	0	797	0	797	0
796.5	100.9	796.5	85.6	796.5	66.6	796.5	0	796.5	0	796.5	0	796.5	0
796	101.1	796	85.7	796	66.5	796	0	796	0	796	0	796	0
795.5	101.1	795.5	85.7	795.5	66.4	795.5	0	795.5	0	795.5	0	795.5	0
795	100.7	795	85.4	795	66.3	795	0	795	0	795	0	795	0
794.5	100.6	794.5	85.2	794.5	66.2	794.5	0	794.5	0	794.5	0	794.5	0
794	100.5	794	85	794	66	794	0	794	0	794	0	794	0
793.5	100.4	793.5	85	793.5	66	793.5	0	793.5	0	793.5	0	793.5	0
793	100.6	793	85.2	793	66	793	0	793	0	793	0	793	0
792.5	100.5	792.5	85.2	792.5	65.9	792.5	0	792.5	0	792.5	0	792.5	0
792	100.3	792	85	792	65.9	792	0	792	0	792	0	792	0
791.5	100.4	791.5	84.8	791.5	65.8	791.5	0	791.5	0	791.5	0	791.5	0
791	100.3	791	84.6	791	65.7	791	0	791	0	791	0	791	0
790.5	100.3	790.5	84.5	790.5	65.6	790.5	0	790.5	0	790.5	0	790.5	0
790	100.4	790	84.7	790	65.5	790	0	790	0	790	0	790	0
789.5	100.4	789.5	84.7	789.5	65.4	789.5	0	789.5	0	789.5	0	789.5	0
789	100.3	789	84.6	789	65.4	789	0	789	0	789	0	789	0
788.5	100.3	788.5	84.6	788.5	65.3	788.5	0	788.5	0	788.5	0	788.5	0
788	100.3	788	84.5	788	65.2	788	0	788	0	788	0	788	0
787.5	100.2	787.5	84.5	787.5	65.1	787.5	0	787.5	0	787.5	0	787.5	0
787	100.2	787	84.5	787	65	787	0	787	0	787	0	787	0
786.5	100.2	786.5	84.5	786.5	65	786.5	0	786.5	0	786.5	0	786.5	0
786	100.1	786	84.4	786	64.9	786	0	786	0	786	0	786	0
785.5	100.1	785.5	84.3	785.5	64.9	785.5	0	785.5	0	785.5	0	785.5	0
785	100.1	785	84.3	785	64.9	785	0	785	0	785	0	785	0
784.5	100.1	784.5	84.2	784.5	64.9	784.5	0	784.5	0	784.5	0	784.5	0
784	100.2	784	84.2	784	64.8	784	0	784	0	784	0	784	0
783.5	100.3	783.5	84.1	783.5	64.7	783.5	0	783.5	0	783.5	0	783.5	0
783	100.2	783	84	783	64.7	783	0	783	0	783	0	783	0
782.5	100.2	782.5	83.9	782.5	64.6	782.5	0	782.5	0	782.5	0	782.5	0
782	100	782	83.9	782	64.5	782	0	782	0	782	0	782	0
781.5	99.8	781.5	83.8	781.5	64.5	781.5	0	781.5	0	781.5	0	781.5	0
781	99.7	781	83.7	781	64.4	781	0	781	0	781	0	781	0
780.5	99.9	780.5	83.6	780.5	64.3	780.5	0	780.5	0	780.5	0	780.5	0
780	100	780	83.6	780	64.3	780	0	780	0	780	0	780	0
779.5	100.1	779.5	83.5	779.5	64.2	779.5	0	779.5	0	779.5	0	779.5	0
779	100	779	83.6	779	64.1	779	0	779	0	779	0	779	0
778.5	99.9	778.5	83.5	778.5	64	778.5	0	778.5	0	778.5	0	778.5	0
778	99.8	778	83.3	778	63.9	778	0	778	0	778	0	778	0
777.5	99.8	777.5	83.2	777.5	63.8	777.5	0	777.5	0	777.5	0	777.5	0
777	99.8	777	83.2	777	63.7	777	0	777	0	777	0	777	0
776.5	99.8	776.5	83.2	776.5	63.6	776.5	0	776.5	0	776.5	0	776.5	0
776	99.8	776	83.2	776	63.5	776	0	776	0	776	0	776	0
775.5	99.9	775.5	83.3	775.5	63.5	775.5	0	775.5	0	775.5	0	775.5	0
775	99.9	775	83.3	775	63.4	775	0	775	0	775	0	775	0
774.5	99.9	774.5	83.2	774.5	63.3	774.5	0	774.5	0	774.5	0	774.5	0
774	99.8	774	83.1	774	63.2	774	0	774	0	774	0	774	0
773.5	99.7	773.5	83	773.5	63.1	773.5	0	773.5	0	773.5	0	773.5	0
773	99.6	773	82.9	773	63	773	0	773	0	773	0	773	0
772.5	99.6	772.5	82.9	772.5	62.9	772.5	0	772.5	0	772.5	0	772.5	0
772	99.5	772	82.8	772	62.8	772	0	772	0	772	0	772	0
771.5	99.6	771.5	82.7	771.5	62.8	771.5	0	771.5	0	771.5	0	771.5	0
771	99.6	771	82.7	771	62.7	771	0	771	0	771	0	771	0
770.5	99.6	770.5	82.6	770.5	62.7	770.5	0	770.5	0	770.5	0	770.5	0
770	99.5	770	82.5	770	62.6	770	0	770	0	770	0	770	0
769.5	99.6	769.5	82.5	769.5	62.6	769.5	0	769.5	0	769.5	0	769.5	0
769	99.5	769	82.4	769	62.5	769	0	769	0	769	0	769	0
768.5	99.5	768.5	82.3	768.5	62.5	768.5	0	768.5	0	768.5	0	768.5	0
768	99.5	768	82.2	768	62.4	768	0	768	0	768	0	768	0
767.5	99.5	767.5	82.2	767.5	62.4	767.5	0	767.5	0	767.5	0	767.5	0
767	99.6	767	82.2	767	62.3	767	0	767	0	767	0	767	0
766.5	99.8	766.5	82.4	766.5	62.2	766.5	0	766.5	0	766.5	0	766.5	0
766	99.7	766	82.3	766	62.1	766	0	766	0	766	0	766	0
765.5	99.7	765.5	82.3	765.5	62.1	765.5	0	765.5	0	765.5	0	765.5	0
765	99.6	765	82.1	765	62	765	0	765	0	765	0	765	0
764.5	99.5	764.5	81.9	764.5	61.9	764.5	0	764.5	0	764.5	0	764.5	0
764	99.5	764	81.8	764	61.9	764	0	764	0	764	0	764	0
763.5	99.5	763.5	81.8	763.5	61.8	763.5	0	763.5	0	763.5	0	763.5	0
763	99.5	763	81.9	763	61.7	763	0	763	0	763	0	763	0
762.5	99.6	762.5	82	762.5	61.6	762.5	0	762.5	0	762.5	0	762.5	0
762	99.6	762	81.9	762	61.5	762	0	762	0	762	0	762	0
761.5	99.7	761.5	81.8	761.5	61.4	761.5	0	761.5	0	761.5	0	761.5	0
761	99.4	761	81.5	761	61.3	761	0	761	0	761	0	761	0
760.5	99.3	760.5	81.4	760.5	61.2	760.5	0	760.5	0	760.5	0	760.5	0
760	99.1	760	81.4	760	61.1	760	0	760	0	760	0	760	0
759.5	99.1	759.5	81.3	759.5	60.9	759.5	0	759.5	0	759.5	0	759.5	0
759	99.1	759	81.4	759	60.8	759	0	759	0	759	0	759	0
758.5	99.2	758.5	81.4	758.5	60.7	758.5	0	758.5	0	758.5	0	758.5	0
758	99.3	758	81.3	758	60.6	758	0	758	0	758	0	758	0
757.5	99.4	757.5	81.4	757.5	60.5	757.5	0	757.5	0	757.5	0	757.5	0
757	99.4	757	81.3	757	60.4	757	0	757	0	757	0	757	0
756.5	99.4	756.5	81.1	756.5	60.3	756.5	0	756.5	0	756.5	0	756.5	0
756	99.4	756	81.1	756	60.2	756	0	756	0	756	0	756	0
755.5	99.3	755.5	81.1	755.5	60.2	755.5	0	755.5	0	755.5	0	755.5	0
755	99.3	755	81	755	60.1	755	0	755	0	755	0	755	0
754.5	99.3	754.5	81	754.5	60	754.5	0	754.5	0	754.5	0	754.5	0
754	99.2	754	80.9	754	59.9	754	0	754	0	754	0	754	0
753.5	99.1	753.5	80.8	753.5	59.8	753.5	0	753.5	0	753.5	0	753.5	0
753	99.2	753	80.8	753	59.8	753	0	753	0	753	0	753	0
752.5	99.2	752.5	80.8	752.5	59.7	752.5	0	752.5	0	752.5	0	752.5	0
752	99.2	752	80.8	752	59.6	752	0	752	0	752	0	752	0
751.5	99.2	751.5	80.8	751.5	59.6	751.5	0	751.5	0	751.5	0	751.5	0
751	99.1	751	80.6	751	59.5	751	0	751	0	751	0	751	0
750.5	99.1	750.5	80.6	750.5	59.5	750.5	0	750.5	0	750.5	0	750.5	0
750	99.2	750	80.5	750	59.4	750	0	750	0	750	0	750	0
749.5	99.1	749.5	80.4	749.5	59.3	749.5	0	749.5	0	749.5	0	749.5	0
749	99.1	749	80.3	749	59.2	749	0	749	0	749	0	749	0
748.5	99.1	748.5	80.2	748.5	59.1	748.5	0	748.5	0	748.5	0	748.5	0
748	99	748	80.2	748	59	748	0	748	0	748	0	748	0
747.5	99.1	747.5	80.2	747.5	58.9	747.5	0	747.5	0	747.5	0	747.5	0
747	99.1	747	80.2	747	58.9	747	0	747	0	747	0	747	0
746.5	99	746.5	80.1	746.5	58.8	746.5	0	746.5	0	746.5	0	746.5	0
746	99	746	80	746	58.7	746	0	746	0	746	0	746	0
745.5	99	745.5	80.1	745.5	58.7	745.5	0	745.5	0	745.5	0	745.5	0
745	98.9	745	80.1	745	58.6	745	0	745	0	745	0	745	0
744.5	98.9	744.5	80.1	744.5	58.5	744.5	0	744.5	0	744.5	0	744.5	0
744	98.8	744	80.1	744	58.4	744	0	744	0	744	0	744	0
743.5	98.9	743.5	80	743.5	58.3	743.5	0	743.5	0	743.5	0	743.5	0
743	98.9	743	80	743	58.3	743	0	743	0	743	0	743	0
742.5	99	742.5	79.9	742.5	58.3	742.5	0	742.5	0	742.5	0	742.5	0
742	99	742	79.9	742	58.2	742	0	742	0	742	0	742	0
741.5	99	741.5	79.8	741.5	58.1	741.5	0	741.5	0	741.5	0	741.5	0
741	99	741	79.9	741	58.1	741	0	741	0	741	0	741	0
740.5	99.1	740.5	79.9	740.5	58	740.5	0	740.5	0	740.5	0	740.5	0
740	99.1	740	79.8	740	57.9	740	0	740	0	740	0	740	0
739.5	98.9	739.5	79.5	739.5	57.8	739.5	0	739.5	0	739.5	0	739.5	0
739	98.7	739	79.3	739	57.7	739	0	739	0	739	0	739	0
738.5	98.7	738.5	79.2	738.5	57.6	738.5	0	738.5	0	738.5	0	738.5	0
738	98.7	738	79	738	57.6	738	0	738	0	738	0	738	0
737.5	98.7	737.5	79	737.5	57.5	737.5	0	737.5	0	737.5	0	737.5	0
737	98.7	737	79	737	57.4	737	0	737	0	737	0	737	0
736.5	98.7	736.5	79	736.5	57.3	736.5	0	736.5	0	736.5	0	736.5	0
736	98.7	736	78.9	736	57.3	736	0	736	0	736	0	736	0
735.5	98.7	735.5	78.8	735.5	57.2	735.5	0	735.5	0	735.5	0	735.5	0
735	98.6	735	78.7	735	57.1	735	0	735	0	735	0	735	0
734.5	98.7	734.5	78.7	734.5	57	734.5	0	734.5	0	734.5	0	734.5	0
734	98.7	734	78.8	734	56.9	734	0	734	0	734	0	734	0
733.5	98.7	733.5	78.8	733.5	56.9	733.5	0	733.5	0	733.5	0	733.5	0
733	98.7	733	78.7	733	56.8	733	0	733	0	733	0	733	0
732.5	98.8	732.5	78.7	732.5	56.8	732.5	0	732.5	0	732.5	0	732.5	0
732	98.8	732	78.8	732	56.8	732	0	732	0	732	0	732	0
731.5	98.8	731.5	78.7	731.5	56.7	731.5	0	731.5	0	731.5	0	731.5	0
731	99	731	78.8	731	56.7	731	0	731	0	731	0	731	0
730.5	99	730.5	78.6	730.5	56.7	730.5	0	730.5	0	730.5	0	730.5	0
730	99	730	78.5	730	56.6	730	0	730	0	730	0	730	0
729.5	98.9	729.5	78.4	729.5	56.5	729.5	0	729.5	0	729.5	0	729.5	0
729	99	729	78.5	729	56.5	729	0	729	0	729	0	729	0
728.5	98.8	728.5	78.4	728.5	56.4	728.5	0	728.5	0	728.5	0	728.5	0
728	98.9	728	78.5	728	56.3	728	0	728	0	728	0	728	0
727.5	99	727.5	78.4	727.5	56.2	727.5	0	727.5	0	727.5	0	727.5	0
727	99.1	727	78.3	727	56.1	727	0	727	0	727	0	727	0
726.5	99	726.5	78.3	726.5	56	726.5	0	726.5	0	726.5	0	726.5	0
726	99	726	78.3	726	56	726	0	726	0	726	0	726	0
725.5	98.9	725.5	78.2	725.5	55.9	725.5	0	725.5	0	725.5	0	725.5	0
725	99	725	78.4	725	55.8	725	0	725	0	725	0	725	0
724.5	99.1	724.5	78.3	724.5	55.8	724.5	0	724.5	0	724.5	0	724.5	0
724	99.1	724	78.2	724	55.7	724	0	724	0	724	0	724	0
723.5	99.1	723.5	78.1	723.5	55.6	723.5	0	723.5	0	723.5	0	723.5	0
723	99.2	723	78	723	55.5	723	0	723	0	723	0	723	0
722.5	99.3	722.5	78	722.5	55.5	722.5	0	722.5	0	722.5	0	722.5	0
722	99.3	722	78.1	722	55.4	722	0	722	0	722	0	722	0
721.5	99.1	721.5	78	721.5	55.4	721.5	0	721.5	0	721.5	0	721.5	0
721	99	721	77.9	721	55.3	721	0	721	0	721	0	721	0
720.5	99	720.5	77.8	720.5	55.2	720.5	0	720.5	0	720.5	0	720.5	0
720	99	720	77.7	720	55.1	720	0	720	0	720	0	720	0
719.5	99.2	719.5	77.7	719.5	55.1	719.5	0	719.5	0	719.5	0	719.5	0
719	99.2	719	77.7	719	55	719	0	719	0	719	0	719	0
718.5	99.2	718.5	77.6	718.5	54.9	718.5	0	718.5	0	718.5	0	718.5	0
718	99.2	718	77.6	718	54.9	718	0	718	0	718	0	718	0
717.5	99.2	717.5	77.6	717.5	54.8	717.5	0	717.5	0	717.5	0	717.5	0
717	99.1	717	77.5	717	54.7	717	0	717	0	717	0	717	0
716.5	99.1	716.5	77.4	716.5	54.6	716.5	0	716.5	0	716.5	0	716.5	0
716	99.1	716	77.3	716	54.5	716	0	716	0	716	0	716	0
715.5	99.1	715.5	77.2	715.5	54.4	715.5	0	715.5	0	715.5	0	715.5	0
715	99.1	715	77.2	715	54.3	715	0	715	0	715	0	715	0
714.5	99.1	714.5	77.2	714.5	54.2	714.5	0	714.5	0	714.5	0	714.5	0
714	99	714	77.2	714	54.2	714	0	714	0	714	0	714	0
713.5	99.1	713.5	77.1	713.5	54.1	713.5	0	713.5	0	713.5	0	713.5	0
713	99.1	713	77	713	54	713	0	713	0	713	0	713	0
712.5	99.1	712.5	76.9	712.5	53.9	712.5	0	712.5	0	712.5	0	712.5	0
712	99	712	76.8	712	53.8	712	0	712	0	712	0	712	0
711.5	99	711.5	76.8	711.5	53.7	711.5	0	711.5	0	711.5	0	711.5	0
711	99	711	76.8	711	53.7	711	0	711	0	711	0	711	0
710.5	99.1	710.5	76.8	710.5	53.6	710.5	0	710.5	0	710.5	0	710.5	0
710	99.1	710	76.8	710	53.5	710	0	710	0	710	0	710	0
709.5	99	709.5	76.6	709.5	53.5	709.5	0	709.5	0	709.5	0	709.5	0
709	99	709	76.6	709	53.4	709	0	709	0	709	0	709	0
708.5	99	708.5	76.5	708.5	53.3	708.5	0	708.5	0	708.5	0	708.5	0
708	98.9	708	76.4	708	53.2	708	0	708	0	708	0	708	0
707.5	98.8	707.5	76.3	707.5	53.1	707.5	0	707.5	0	707.5	0	707.5	0
707	98.8	707	76.3	707	53	707	0	707	0	707	0	707	0
706.5	98.8	706.5	76.2	706.5	52.9	706.5	0	706.5	0	706.5	0	706.5	0
706	98.8	706	76.1	706	52.8	706	0	706	0	706	0	706	0
705.5	98.8	705.5	76.1	705.5	52.7	705.5	0	705.5	0	705.5	0	705.5	0
705	98.8	705	76	705	52.7	705	0	705	0	705	0	705	0
704.5	98.8	704.5	75.9	704.5	52.6	704.5	0	704.5	0	704.5	0	704.5	0
704	98.8	704	75.9	704	52.5	704	0	704	0	704	0	704	0
703.5	98.9	703.5	75.9	703.5	52.4	703.5	0	703.5	0	703.5	0	703.5	0
703	98.9	703	75.8	703	52.3	703	0	703	0	703	0	703	0
702.5	98.9	702.5	75.7	702.5	52.2	702.5	0	702.5	0	702.5	0	702.5	0
702	98.9	702	75.7	702	52.1	702	0	702	0	702	0	702	0
701.5	98.9	701.5	75.6	701.5	52	701.5	0	701.5	0	701.5	0	701.5	0
701	98.9	701	75.5	701	51.9	701	0	701	0	701	0	701	0
700.5	98.8	700.5	75.3	700.5	51.9	700.5	0	700.5	0	700.5	0	700.5	0
700	98.7	700	75.2	700	51.7	700	0	700	0	700	0	700	0
699.5	98.7	699.5	75.2	699.5	51.6	699.5	0	699.5	0	699.5	0	699.5	0
699	98.7	699	75.2	699	51.5	699	0	699	0	699	0	699	0
698.5	98.7	698.5	75.2	698.5	51.5	698.5	0	698.5	0	698.5	0	698.5	0
698	98.7	698	75.1	698	51.4	698	0	698	0	698	0	698	0
697.5	98.6	697.5	75	697.5	51.3	697.5	0	697.5	0	697.5	0	697.5	0
697	98.5	697	74.8	697	51.2	697	0	697	0	697	0	697	0
696.5	98.5	696.5	74.7	696.5	51.1	696.5	0	696.5	0	696.5	0	696.5	0
696	98.5	696	74.7	696	51	696	0	696	0	696	0	696	0
695.5	98.5	695.5	74.7	695.5	50.9	695.5	0	695.5	0	695.5	0	695.5	0
695	98.4	695	74.7	695	50.8	695	0	695	0	695	0	695	0
694.5	98.4	694.5	74.7	694.5	50.7	694.5	0	694.5	0	694.5	0	694.5	0
694	98.4	694	74.5	694	50.7	694	0	694	0	694	0	694	0
693.5	98.4	693.5	74.4	693.5	50.6	693.5	0	693.5	0	693.5	0	693.5	0
693	98.5	693	74.3	693	50.5	693	0	693	0	693	0	693	0
692.5	98.4	692.5	74.3	692.5	50.4	692.5	0	692.5	0	692.5	0	692.5	0
692	98.4	692	74.2	692	50.3	692	0	692	0	692	0	692	0
691.5	98.3	691.5	74.1	691.5	50.2	691.5	0	691.5	0	691.5	0	691.5	0
691	98.2	691	73.9	691	50.1	691	0	691	0	691	0	691	0
690.5	98.2	690.5	73.9	690.5	49.9	690.5	0	690.5	0	690.5	0	690.5	0
690	98.3	690	73.8	690	49.8	690	0	690	0	690	0	690	0
689.5	98.3	689.5	73.8	689.5	49.8	689.5	0	689.5	0	689.5	0	689.5	0
689	98.2	689	73.7	689	49.7	689	0	689	0	689	0	689	0
688.5	98.1	688.5	73.7	688.5	49.6	688.5	0	688.5	0	688.5	0	688.5	0
688	98.1	688	73.5	688	49.6	688	0	688	0	688	0	688	0
687.5	98.1	687.5	73.4	687.5	49.5	687.5	0	687.5	0	687.5	0	687.5	0
687	98.1	687	73.3	687	49.4	687	0	687	0	687	0	687	0
686.5	98.1	686.5	73.3	686.5	49.3	686.5	0	686.5	0	686.5	0	686.5	0
686	98.1	686	73.3	686	49.2	686	0	686	0	686	0	686	0
685.5	98.1	685.5	73.2	685.5	49.1	685.5	0	685.5	0	685.5	0	685.5	0
685	98	685	73.1	685	49	685	0	685	0	685	0	685	0
684.5	98	684.5	73	684.5	48.8	684.5	0	684.5	0	684.5	0	684.5	0
684	97.9	684	72.9	684	48.7	684	0	684	0	684	0	684	0
683.5	98	683.5	72.9	683.5	48.6	683.5	0	683.5	0	683.5	0	683.5	0
683	98	683	72.9	683	48.6	683	0	683	0	683	0	683	0
682.5	97.9	682.5	72.8	682.5	48.5	682.5	0	682.5	0	682.5	0	682.5	0
682	97.8	682	72.7	682	48.4	682	0	682	0	682	0	682	0
681.5	97.8	681.5	72.6	681.5	48.3	681.5	0	681.5	0	681.5	0	681.5	0
681	97.8	681	72.4	681	48.2	681	0	681	0	681	0	681	0
680.5	97.9	680.5	72.4	680.5	48.1	680.5	0	680.5	0	680.5	0	680.5	0
680	97.9	680	72.3	680	48	680	0	680	0	680	0	680	0
679.5	97.9	679.5	72.3	679.5	47.9	679.5	0	679.5	0	679.5	0	679.5	0
679	97.9	679	72.2	679	47.8	679	0	679	0	679	0	679	0
678.5	97.8	678.5	72.2	678.5	47.8	678.5	0	678.5	0	678.5	0	678.5	0
678	97.8	678	72.1	678	47.7	678	0	678	0	678	0	678	0
677.5	97.7	677.5	72	677.5	47.6	677.5	0	677.5	0	677.5	0	677.5	0
677	97.7	677	71.9	677	47.4	677	0	677	0	677	0	677	0
676.5	97.5	676.5	71.8	676.5	47.3	676.5	0	676.5	0	676.5	0	676.5	0
676	97.5	676	71.7	676	47.2	676	0	676	0	676	0	676	0
675.5	97.6	675.5	71.7	675.5	47.1	675.5	0	675.5	0	675.5	0	675.5	0
675	97.6	675	71.6	675	47	675	0	675	0	675	0	675	0
674.5	97.6	674.5	71.5	674.5	46.9	674.5	0	674.5	0	674.5	0	674.5	0
674	97.5	674	71.4	674	46.8	674	0	674	0	674	0	674	0
673.5	97.5	673.5	71.3	673.5	46.7	673.5	0	673.5	0	673.5	0	673.5	0
673	97.5	673	71.2	673	46.6	673	0	673	0	673	0	673	0
672.5	97.5	672.5	71.1	672.5	46.5	672.5	0	672.5	0	672.5	0	672.5	0
672	97.4	672	71.1	672	46.4	672	0	672	0	672	0	672	0
671.5	97.4	671.5	71	671.5	46.3	671.5	0	671.5	0	671.5	0	671.5	0
671	97.3	671	70.9	671	46.2	671	0	671	0	671	0	671	0
670.5	97.3	670.5	70.8	670.5	46.1	670.5	0	670.5	0	670.5	0	670.5	0
670	97.2	670	70.8	670	46	670	0	670	0	670	0	670	0
669.5	97.2	669.5	70.7	669.5	45.9	669.5	0	669.5	0	669.5	0	669.5	0
669	97.1	669	70.6	669	45.9	669	0	669	0	669	0	669	0
668.5	97.2	668.5	70.5	668.5	45.8	668.5	0	668.5	0	668.5	0	668.5	0
668	97.2	668	70.4	668	45.7	668	0	668	0	668	0	668	0
667.5	97.2	667.5	70.4	667.5	45.6	667.5	0	667.5	0	667.5	0	667.5	0
667	97.2	667	70.3	667	45.4	667	0	667	0	667	0	667	0
666.5	97.2	666.5	70.2	666.5	45.3	666.5	0	666.5	0	666.5	0	666.5	0
666	97.1	666	70.1	666	45.2	666	0	666	0	666	0	666	0
665.5	97.1	665.5	70	665.5	45.1	665.5	0	665.5	0	665.5	0	665.5	0
665	97	665	69.9	665	45	665	0	665	0	665	0	665	0
664.5	97	664.5	69.8	664.5	44.9	664.5	0	664.5	0	664.5	0	664.5	0
664	96.9	664	69.7	664	44.8	664	0	664	0	664	0	664	0
663.5	96.9	663.5	69.6	663.5	44.8	663.5	0	663.5	0	663.5	0	663.5	0
663	96.9	663	69.5	663	44.7	663	0	663	0	663	0	663	0
662.5	96.8	662.5	69.4	662.5	44.6	662.5	0	662.5	0	662.5	0	662.5	0
662	96.7	662	69.3	662	44.5	662	0	662	0	662	0	662	0
661.5	96.7	661.5	69.3	661.5	44.3	661.5	0	661.5	0	661.5	0	661.5	0
661	96.8	661	69.2	661	44.2	661	0	661	0	661	0	661	0
660.5	96.8	660.5	69.1	660.5	44.1	660.5	0	660.5	0	660.5	0	660.5	0
660	96.7	660	69	660	44	660	0	660	0	660	0	660	0
659.5	96.7	659.5	68.9	659.5	44	659.5	0	659.5	0	659.5	0	659.5	0
659	96.7	659	68.9	659	43.9	659	0	659	0	659	0	659	0
658.5	96.7	658.5	68.8	658.5	43.8	658.5	0	658.5	0	658.5	0	658.5	0
658	96.6	658	68.7	658	43.7	658	0	658	0	658	0	658	0
657.5	96.6	657.5	68.6	657.5	43.6	657.5	0	657.5	0	657.5	0	657.5	0
657	96.6	657	68.5	657	43.5	657	0	657	0	657	0	657	0
656.5	96.6	656.5	68.5	656.5	43.4	656.5	0	656.5	0	656.5	0	656.5	0
656	96.6	656	68.4	656	43.3	656	0	656	0	656	0	656	0
655.5	96.4	655.5	68.3	655.5	43.1	655.5	0	655.5	0	655.5	0	655.5	0
655	96.3	655	68.1	655	43	655	0	655	0	655	0	655	0
654.5	96.4	654.5	68	654.5	42.9	654.5	0	654.5	0	654.5	0	654.5	0
654	96.4	654	68	654	42.8	654	0	654	0	654	0	654	0
653.5	96.4	653.5	67.9	653.5	42.7	653.5	0	653.5	0	653.5	0	653.5	0
653	96.4	653	67.8	653	42.6	653	0	653	0	653	0	653	0
652.5	96.3	652.5	67.7	652.5	42.5	652.5	0	652.5	0	652.5	0	652.5	0
652	96.2	652	67.6	652	42.4	652	0	652	0	652	0	652	0
651.5	96.3	651.5	67.5	651.5	42.3	651.5	0	651.5	0	651.5	0	651.5	0
651	96.3	651	67.4	651	42.2	651	0	651	0	651	0	651	0
650.5	96.3	650.5	67.3	650.5	42.1	650.5	0	650.5	0	650.5	0	650.5	0
650	96.2	650	67.2	650	42	650	0	650	0	650	0	650	0
649.5	96.2	649.5	67.1	649.5	41.8	649.5	0	649.5	0	649.5	0	649.5	0
649	96.1	649	67	649	41.7	649	0	649	0	649	0	649	0
648.5	96	648.5	66.9	648.5	41.7	648.5	0	648.5	0	648.5	0	648.5	0
648	96	648	66.9	648	41.6	648	0	648	0	648	0	648	0
647.5	95.8	647.5	66.8	647.5	41.5	647.5	0	647.5	0	647.5	0	647.5	0
647	95.8	647	66.6	647	41.4	647	0	647	0	647	0	647	0
646.5	95.8	646.5	66.5	646.5	41.3	646.5	0	646.5	0	646.5	0	646.5	0
646	95.8	646	66.4	646	41.2	646	0	646	0	646	0	646	0
645.5	95.8	645.5	66.4	645.5	41	645.5	0	645.5	0	645.5	0	645.5	0
645	95.9	645	66.4	645	40.9	645	0	645	0	645	0	645	0
644.5	95.9	644.5	66.2	644.5	40.8	644.5	0	644.5	0	644.5	0	644.5	0
644	95.8	644	66.1	644	40.7	644	0	644	0	644	0	644	0
643.5	95.7	643.5	66	643.5	40.6	643.5	0	643.5	0	643.5	0	643.5	0
643	95.6	643	65.9	643	40.4	643	0	643	0	643	0	643	0
642.5	95.7	642.5	65.8	642.5	40.3	642.5	0	642.5	0	642.5	0	642.5	0
642	95.7	642	65.7	642	40.2	642	0	642	0	642	0	642	0
641.5	95.6	641.5	65.6	641.5	40.1	641.5	0	641.5	0	641.5	0	641.5	0
641	95.6	641	65.5	641	40.1	641	0	641	0	641	0	641	0
640.5	95.5	640.5	65.4	640.5	40	640.5	0	640.5	0	640.5	0	640.5	0
640	95.5	640	65.3	640	39.9	640	0	640	0	640	0	640	0
639.5	95.5	639.5	65.2	639.5	39.8	639.5	0	639.5	0	639.5	0	639.5	0
639	95.5	639	65.2	639	39.7	639	0	639	0	639	0	639	0
638.5	95.5	638.5	65.1	638.5	39.6	638.5	0	638.5	0	638.5	0	638.5	0
638	95.4	638	65	638	39.4	638	0	638	0	638	0	638	0
637.5	95.4	637.5	64.9	637.5	39.3	637.5	0	637.5	0	637.5	0	637.5	0
637	95.3	637	64.8	637	39.2	637	0	637	0	637	0	637	0
636.5	95.3	636.5	64.7	636.5	39.1	636.5	0	636.5	0	636.5	0	636.5	0
636	95.3	636	64.6	636	39	636	0	636	0	636	0	636	0
635.5	95.3	635.5	64.5	635.5	38.9	635.5	0	635.5	0	635.5	0	635.5	0
635	95.2	635	64.4	635	38.8	635	0	635	0	635	0	635	0
634.5	95.2	634.5	64.3	634.5	38.7	634.5	0	634.5	0	634.5	0	634.5	0
634	95	634	64.1	634	38.5	634	0	634	0	634	0	634	0
633.5	95.1	633.5	64	633.5	38.4	633.5	0	633.5	0	633.5	0	633.5	0
633	95	633	63.9	633	38.3	633	0	633	0	633	0	633	0
632.5	95	632.5	63.8	632.5	38.2	632.5	0	632.5	0	632.5	0	632.5	0
632	94.9	632	63.7	632	38.1	632	0	632	0	632	0	632	0
631.5	94.8	631.5	63.6	631.5	38	631.5	0	631.5	0	631.5	0	631.5	0
631	94.7	631	63.5	631	37.9	631	0	631	0	631	0	631	0
630.5	94.8	630.5	63.4	630.5	37.8	630.5	0	630.5	0	630.5	0	630.5	0
630	94.7	630	63.3	630	37.7	630	0	630	0	630	0	630	0
629.5	94.7	629.5	63.2	629.5	37.6	629.5	0	629.5	0	629.5	0	629.5	0
629	94.7	629	63.1	629	37.5	629	0	629	0	629	0	629	0
628.5	94.6	628.5	63	628.5	37.4	628.5	0	628.5	0	628.5	0	628.5	0
628	94.6	628	62.9	628	37.3	628	0	628	0	628	0	628	0
627.5	94.7	627.5	62.8	627.5	37.2	627.5	0	627.5	0	627.5	0	627.5	0
627	94.6	627	62.7	627	37.1	627	0	627	0	627	0	627	0
626.5	94.6	626.5	62.6	626.5	37	626.5	0	626.5	0	626.5	0	626.5	0
626	94.6	626	62.6	626	36.9	626	0	626	0	626	0	626	0
625.5	94.5	625.5	62.4	625.5	36.7	625.5	0	625.5	0	625.5	0	625.5	0
625	94.4	625	62.3	625	36.6	625	0	625	0	625	0	625	0
624.5	94.3	624.5	62.2	624.5	36.5	624.5	0	624.5	0	624.5	0	624.5	0
624	94.3	624	62.1	624	36.3	624	0	624	0	624	0	624	0
623.5	94.2	623.5	61.9	623.5	36.2	623.5	0	623.5	0	623.5	0	623.5	0
623	94.2	623	61.8	623	36.1	623	0	623	0	623	0	623	0
622.5	94.2	622.5	61.7	622.5	36	622.5	0	622.5	0	622.5	0	622.5	0
622	94.2	622	61.7	622	35.9	622	0	622	0	622	0	622	0
621.5	94.2	621.5	61.6	621.5	35.8	621.5	0	621.5	0	621.5	0	621.5	0
621	94.1	621	61.4	621	35.7	621	0	621	0	621	0	621	0
620.5	94.1	620.5	61.3	620.5	35.6	620.5	0	620.5	0	620.5	0	620.5	0
620	94	620	61.2	620	35.5	620	0	620	0	620	0	620	0
619.5	94	619.5	61.1	619.5	35.4	619.5	0	619.5	0	619.5	0	619.5	0
619	94	619	61	619	35.3	619	0	619	0	619	0	619	0
618.5	93.9	618.5	60.9	618.5	35.2	618.5	0	618.5	0	618.5	0	618.5	0
618	93.8	618	60.8	618	35.1	618	0	618	0	618	0	618	0
617.5	93.8	617.5	60.7	617.5	35	617.5	0	617.5	0	617.5	0	617.5	0
617	93.7	617	60.6	617	34.9	617	0	617	0	617	0	617	0
616.5	93.7	616.5	60.5	616.5	34.7	616.5	0	616.5	0	616.5	0	616.5	0
616	93.7	616	60.4	616	34.6	616	0	616	0	616	0	616	0
615.5	93.6	615.5	60.3	615.5	34.5	615.5	0	615.5	0	615.5	0	615.5	0
615	93.6	615	60.2	615	34.4	615	0	615	0	615	0	615	0
614.5	93.5	614.5	60.1	614.5	34.3	614.5	0	614.5	0	614.5	0	614.5	0
614	93.5	614	59.9	614	34.2	614	0	614	0	614	0	614	0
613.5	93.5	613.5	59.8	613.5	34.1	613.5	0	613.5	0	613.5	0	613.5	0
613	93.4	613	59.7	613	33.9	613	0	613	0	613	0	613	0
612.5	93.4	612.5	59.6	612.5	33.8	612.5	0	612.5	0	612.5	0	612.5	0
612	93.4	612	59.5	612	33.7	612	0	612	0	612	0	612	0
611.5	93.4	611.5	59.4	611.5	33.6	611.5	0	611.5	0	611.5	0	611.5	0
611	93.4	611	59.2	611	33.5	611	0	611	0	611	0	611	0
610.5	93.3	610.5	59.1	610.5	33.4	610.5	0	610.5	0	610.5	0	610.5	0
610	93.2	610	59	610	33.3	610	0	610	0	610	0	610	0
609.5	93.2	609.5	58.9	609.5	33.1	609.5	0	609.5	0	609.5	0	609.5	0
609	93.1	609	58.8	609	33	609	0	609	0	609	0	609	0
608.5	93.1	608.5	58.7	608.5	32.9	608.5	0	608.5	0	608.5	0	608.5	0
608	93	608	58.6	608	32.8	608	0	608	0	608	0	608	0
607.5	92.9	607.5	58.5	607.5	32.7	607.5	0	607.5	0	607.5	0	607.5	0
607	92.9	607	58.4	607	32.6	607	0	607	0	607	0	607	0
606.5	92.9	606.5	58.3	606.5	32.5	606.5	0	606.5	0	606.5	0	606.5	0
606	92.9	606	58.2	606	32.4	606	0	606	0	606	0	606	0
605.5	92.8	605.5	58.1	605.5	32.3	605.5	0	605.5	0	605.5	0	605.5	0
605	92.7	605	58	605	32.1	605	0	605	0	605	0	605	0
604.5	92.7	604.5	57.8	604.5	32	604.5	0	604.5	0	604.5	0	604.5	0
604	92.7	604	57.7	604	31.9	604	0	604	0	604	0	604	0
603.5	92.6	603.5	57.6	603.5	31.8	603.5	0	603.5	0	603.5	0	603.5	0
603	92.6	603	57.5	603	31.7	603	0	603	0	603	0	603	0
602.5	92.4	602.5	57.3	602.5	31.6	602.5	0	602.5	0	602.5	0	602.5	0
602	92.4	602	57.2	602	31.5	602	0	602	0	602	0	602	0
601.5	92.4	601.5	57.2	601.5	31.3	601.5	0	601.5	0	601.5	0	601.5	0
601	92.4	601	57.1	601	31.2	601	0	601	0	601	0	601	0
600.5	92.4	600.5	57	600.5	31	600.5	0	600.5	0	600.5	0	600.5	0
600	92.4	600	56.8	600	30.8	600	0	600	0	600	0	600	0
599.5	92.3	599.5	56.7	599.5	30.7	599.5	0	599.5	0	599.5	0	599.5	0
599	92.3	599	56.6	599	30.5	599	0	599	0	599	0	599	0
598.5	92.2	598.5	56.5	598.5	30.5	598.5	0	598.5	0	598.5	0	598.5	0
598	92	598	56.4	598	30.4	598	0	598	0	598	0	598	0
597.5	92	597.5	56.3	597.5	30.3	597.5	0	597.5	0	597.5	0	597.5	0
597	91.9	597	56.1	597	30.2	597	0	597	0	597	0	597	0
596.5	91.9	596.5	56.1	596.5	30.1	596.5	0	596.5	0	596.5	0	596.5	0
596	92	596	56	596	30	596	0	596	0	596	0	596	0
595.5	91.9	595.5	55.9	595.5	29.8	595.5	0	595.5	0	595.5	0	595.5	0
595	91.8	595	55.7	595	29.7	595	0	595	0	595	0	595	0
594.5	91.7	594.5	55.5	594.5	29.6	594.5	0	594.5	0	594.5	0	594.5	0
594	91.6	594	55.4	594	29.4	594	0	594	0	594	0	594	0
593.5	91.6	593.5	55.4	593.5	29.3	593.5	0	593.5	0	593.5	0	593.5	0
593	91.7	593	55.2	593	29.2	593	0	593	0	593	0	593	0
592.5	91.6	592.5	55.1	592.5	29.1	592.5	0	592.5	0	592.5	0	592.5	0
592	91.5	592	55	592	29	592	0	592	0	592	0	592	0
591.5	91.5	591.5	54.8	591.5	28.8	591.5	0	591.5	0	591.5	0	591.5	0
591	91.4	591	54.7	591	28.8	591	0	591	0	591	0	591	0
590.5	91.4	590.5	54.7	590.5	28.7	590.5	0	590.5	0	590.5	0	590.5	0
590	91.3	590	54.5	590	28.6	590	0	590	0	590	0	590	0
589.5	91.3	589.5	54.4	589.5	28.5	589.5	0	589.5	0	589.5	0	589.5	0
589	91.4	589	54.3	589	28.4	589	0	589	0	589	0	589	0
588.5	91.3	588.5	54.1	588.5	28.3	588.5	0	588.5	0	588.5	0	588.5	0
588	91.3	588	54.1	588	28.1	588	0	588	0	588	0	588	0
587.5	91.3	587.5	54	587.5	28	587.5	0	587.5	0	587.5	0	587.5	0
587	91.1	587	53.9	587	27.9	587	0	587	0	587	0	587	0
586.5	91.1	586.5	53.8	586.5	27.8	586.5	0	586.5	0	586.5	0	586.5	0
586	91.1	586	53.7	586	27.7	586	0	586	0	586	0	586	0
585.5	90.9	585.5	53.6	585.5	27.6	585.5	0	585.5	0	585.5	0	585.5	0
585	90.9	585	53.5	585	27.5	585	0	585	0	585	0	585	0
584.5	90.9	584.5	53.3	584.5	27.3	584.5	0	584.5	0	584.5	0	584.5	0
584	90.9	584	53.2	584	27.2	584	0	584	0	584	0	584	0
583.5	90.9	583.5	53	583.5	27.1	583.5	0	583.5	0	583.5	0	583.5	0
583	90.8	583	52.9	583	27	583	0	583	0	583	0	583	0
582.5	90.7	582.5	52.8	582.5	26.8	582.5	0	582.5	0	582.5	0	582.5	0
582	90.7	582	52.6	582	26.7	582	0	582	0	582	0	582	0
581.5	90.5	581.5	52.5	581.5	26.6	581.5	0	581.5	0	581.5	0	581.5	0
581	90.4	581	52.4	581	26.5	581	0	581	0	581	0	581	0
580.5	90.4	580.5	52.2	580.5	26.4	580.5	0	580.5	0	580.5	0	580.5	0
580	90.3	580	52.1	580	26.3	580	0	580	0	580	0	580	0
579.5	90.3	579.5	52	579.5	26.2	579.5	0	579.5	0	579.5	0	579.5	0
579	90.3	579	51.9	579	26.1	579	0	579	0	579	0	579	0
578.5	90.2	578.5	51.8	578.5	26	578.5	0	578.5	0	578.5	0	578.5	0
578	90.1	578	51.6	578	25.8	578	0	578	0	578	0	578	0
577.5	90	577.5	51.5	577.5	25.7	577.5	0	577.5	0	577.5	0	577.5	0
577	90	577	51.3	577	25.6	577	0	577	0	577	0	577	0
576.5	90.1	576.5	51.2	576.5	25.5	576.5	0	576.5	0	576.5	0	576.5	0
576	90	576	51.1	576	25.4	576	0	576	0	576	0	576	0
575.5	90.1	575.5	51	575.5	25.3	575.5	0	575.5	0	575.5	0	575.5	0
575	90	575	50.9	575	25.2	575	0	575	0	575	0	575	0
574.5	89.8	574.5	50.7	574.5	25.1	574.5	0	574.5	0	574.5	0	574.5	0
574	89.7	574	50.6	574	24.9	574	0	574	0	574	0	574	0
573.5	89.6	573.5	50.5	573.5	24.8	573.5	0	573.5	0	573.5	0	573.5	0
573	89.5	573	50.3	573	24.7	573	0	573	0	573	0	573	0
572.5	89.5	572.5	50.1	572.5	24.6	572.5	0	572.5	0	572.5	0	572.5	0
572	89.4	572	50	572	24.4	572	0	572	0	572	0	572	0
571.5	89.3	571.5	49.8	571.5	24.3	571.5	0	571.5	0	571.5	0	571.5	0
571	89.3	571	49.7	571	24.2	571	0	571	0	571	0	571	0
570.5	89.2	570.5	49.6	570.5	24.1	570.5	0	570.5	0	570.5	0	570.5	0
570	89.2	570	49.5	570	24	570	0	570	0	570	0	570	0
569.5	89.1	569.5	49.4	569.5	23.9	569.5	0	569.5	0	569.5	0	569.5	0
569	88.9	569	49.2	569	23.8	569	0	569	0	569	0	569	0
568.5	88.9	568.5	49.1	568.5	23.7	568.5	0	568.5	0	568.5	0	568.5	0
568	88.9	568	49	568	23.6	568	0	568	0	568	0	568	0
567.5	88.9	567.5	48.9	567.5	23.5	567.5	0	567.5	0	567.5	0	567.5	0
567	88.8	567	48.7	567	23.4	567	0	567	0	567	0	567	0
566.5	88.6	566.5	48.6	566.5	23.2	566.5	0	566.5	0	566.5	0	566.5	0
566	88.5	566	48.4	566	23.1	566	0	566	0	566	0	566	0
565.5	88.6	565.5	48.3	565.5	23	565.5	0	565.5	0	565.5	0	565.5	0
565	88.5	565	48.2	565	22.9	565	0	565	0	565	0	565	0
564.5	88.5	564.5	48	564.5	22.8	564.5	0	564.5	0	564.5	0	564.5	0
564	88.4	564	47.9	564	22.7	564	0	564	0	564	0	564	0
563.5	88.2	563.5	47.7	563.5	22.6	563.5	0	563.5	0	563.5	0	563.5	0
563	88.2	563	47.6	563	22.4	563	0	563	0	563	0	563	0
562.5	88.2	562.5	47.5	562.5	22.3	562.5	0	562.5	0	562.5	0	562.5	0
562	88.1	562	47.4	562	22.2	562	0	562	0	562	0	562	0
561.5	88.1	561.5	47.2	561.5	22.1	561.5	0	561.5	0	561.5	0	561.5	0
561	88	561	47.1	561	22	561	0	561	0	561	0	561	0
560.5	87.9	560.5	47	560.5	21.9	560.5	0	560.5	0	560.5	0	560.5	0
560	87.9	560	46.8	560	21.8	560	0	560	0	560	0	560	0
559.5	87.9	559.5	46.7	559.5	21.7	559.5	0	559.5	0	559.5	0	559.5	0
559	87.8	559	46.5	559	21.6	559	0	559	0	559	0	559	0
558.5	87.7	558.5	46.4	558.5	21.5	558.5	0	558.5	0	558.5	0	558.5	0
558	87.6	558	46.3	558	21.4	558	0	558	0	558	0	558	0
557.5	87.5	557.5	46.1	557.5	21.3	557.5	0	557.5	0	557.5	0	557.5	0
557	87.4	557	46	557	21.2	557	0	557	0	557	0	557	0
556.5	87.4	556.5	45.9	556.5	21.1	556.5	0	556.5	0	556.5	0	556.5	0
556	87.3	556	45.8	556	20.9	556	0	556	0	556	0	556	0
555.5	87.2	555.5	45.6	555.5	20.8	555.5	0	555.5	0	555.5	0	555.5	0
555	87.1	555	45.5	555	20.7	555	0	555	0	555	0	555	0
554.5	87	554.5	45.3	554.5	20.6	554.5	0	554.5	0	554.5	0	554.5	0
554	86.9	554	45.2	554	20.5	554	0	554	0	554	0	554	0
553.5	86.8	553.5	45	553.5	20.4	553.5	0	553.5	0	553.5	0	553.5	0
553	86.7	553	44.8	553	20.2	553	0	553	0	553	0	553	0
552.5	86.7	552.5	44.7	552.5	20.1	552.5	0	552.5	0	552.5	0	552.5	0
552	86.6	552	44.6	552	20	552	0	552	0	552	0	552	0
551.5	86.6	551.5	44.4	551.5	19.9	551.5	0	551.5	0	551.5	0	551.5	0
551	86.5	551	44.2	551	19.8	551	0	551	0	551	0	551	0
550.5	86.4	550.5	44.1	550.5	19.7	550.5	0	550.5	0	550.5	0	550.5	0
550	86.4	550	44	550	19.6	550	0	550	0	550	0	550	0
549.5	86.3	549.5	43.8	549.5	19.5	549.5	0	549.5	0	549.5	0	549.5	0
549	86.3	549	43.7	549	19.4	549	0	549	0	549	0	549	0
548.5	86.2	548.5	43.6	548.5	19.3	548.5	0	548.5	0	548.5	0	548.5	0
548	86.2	548	43.5	548	19.2	548	0	548	0	548	0	548	0
547.5	86	547.5	43.3	547.5	19.1	547.5	0	547.5	0	547.5	0	547.5	0
547	86	547	43.2	547	18.9	547	0	547	0	547	0	547	0
546.5	85.8	546.5	43.1	546.5	18.8	546.5	0	546.5	0	546.5	0	546.5	0
546	85.8	546	42.9	546	18.7	546	0	546	0	546	0	546	0
545.5	85.7	545.5	42.8	545.5	18.6	545.5	0	545.5	0	545.5	0	545.5	0
545	85.6	545	42.6	545	18.5	545	0	545	0	545	0	545	0
544.5	85.5	544.5	42.5	544.5	18.4	544.5	0	544.5	0	544.5	0	544.5	0
544	85.5	544	42.3	544	18.3	544	0	544	0	544	0	544	0
543.5	85.3	543.5	42.2	543.5	18.2	543.5	0	543.5	0	543.5	0	543.5	0
543	85.3	543	42	543	18.1	543	0	543	0	543	0	543	0
542.5	85.2	542.5	41.8	542.5	18	542.5	0	542.5	0	542.5	0	542.5	0
542	85.1	542	41.7	542	17.8	542	0	542	0	542	0	542	0
541.5	85	541.5	41.5	541.5	17.7	541.5	0	541.5	0	541.5	0	541.5	0
541	85	541	41.4	541	17.6	541	0	541	0	541	0	541	0
540.5	84.9	540.5	41.3	540.5	17.5	540.5	0	540.5	0	540.5	0	540.5	0
540	84.8	540	41.1	540	17.4	540	0	540	0	540	0	540	0
539.5	84.7	539.5	41	539.5	17.3	539.5	0	539.5	0	539.5	0	539.5	0
539	84.5	539	40.9	539	17.2	539	0	539	0	539	0	539	0
538.5	84.4	538.5	40.7	538.5	17.1	538.5	0	538.5	0	538.5	0	538.5	0
538	84.4	538	40.6	538	17	538	0	538	0	538	0	538	0
537.5	84.3	537.5	40.5	537.5	16.9	537.5	0	537.5	0	537.5	0	537.5	0
537	84.3	537	40.3	537	16.8	537	0	537	0	537	0	537	0
536.5	84.1	536.5	40.2	536.5	16.7	536.5	0	536.5	0	536.5	0	536.5	0
536	84	536	40	536	16.6	536	0	536	0	536	0	536	0
535.5	83.9	535.5	39.9	535.5	16.5	535.5	0	535.5	0	535.5	0	535.5	0
535	83.8	535	39.7	535	16.4	535	0	535	0	535	0	535	0
534.5	83.8	534.5	39.6	534.5	16.3	534.5	0	534.5	0	534.5	0	534.5	0
534	83.7	534	39.4	534	16.2	534	0	534	0	534	0	534	0
533.5	83.5	533.5	39.3	533.5	16.1	533.5	0	533.5	0	533.5	0	533.5	0
533	83.4	533	39.1	533	15.9	533	0	533	0	533	0	533	0
532.5	83.3	532.5	38.9	532.5	15.8	532.5	0	532.5	0	532.5	0	532.5	0
532	83.2	532	38.8	532	15.7	532	0	532	0	532	0	532	0
531.5	83.2	531.5	38.6	531.5	15.6	531.5	0	531.5	0	531.5	0	531.5	0
531	83.1	531	38.5	531	15.5	531	0	531	0	531	0	531	0
530.5	83	530.5	38.3	530.5	15.4	530.5	0	530.5	0	530.5	0	530.5	0
530	82.9	530	38.2	530	15.3	530	0	530	0	530	0	530	0
529.5	82.8	529.5	38.1	529.5	15.2	529.5	0	529.5	0	529.5	0	529.5	0
529	82.7	529	37.9	529	15.2	529	0	529	0	529	0	529	0
528.5	82.6	528.5	37.8	528.5	15.1	528.5	0	528.5	0	528.5	0	528.5	0
528	82.5	528	37.6	528	15	528	0	528	0	528	0	528	0
527.5	82.4	527.5	37.5	527.5	14.9	527.5	0	527.5	0	527.5	0	527.5	0
527	82.3	527	37.4	527	14.8	527	0	527	0	527	0	527	0
526.5	82.2	526.5	37.2	526.5	14.7	526.5	0	526.5	0	526.5	0	526.5	0
526	82.1	526	37.1	526	14.5	526	0	526	0	526	0	526	0
525.5	82	525.5	36.9	525.5	14.4	525.5	0	525.5	0	525.5	0	525.5	0
525	81.9	525	36.8	525	14.3	525	0	525	0	525	0	525	0
524.5	81.8	524.5	36.6	524.5	14.2	524.5	0	524.5	0	524.5	0	524.5	0
524	81.7	524	36.4	524	14.1	524	0	524	0	524	0	524	0
523.5	81.5	523.5	36.3	523.5	14	523.5	0	523.5	0	523.5	0	523.5	0
523	81.4	523	36.1	523	13.9	523	0	523	0	523	0	523	0
522.5	81.3	522.5	36	522.5	13.8	522.5	0	522.5	0	522.5	0	522.5	0
522	81.2	522	35.8	522	13.7	522	0	522	0	522	0	522	0
521.5	81	521.5	35.6	521.5	13.6	521.5	0	521.5	0	521.5	0	521.5	0
521	80.9	521	35.5	521	13.5	521	0	521	0	521	0	521	0
520.5	80.8	520.5	35.3	520.5	13.4	520.5	0	520.5	0	520.5	0	520.5	0
520	80.8	520	35.2	520	13.3	520	0	520	0	520	0	520	0
519.5	80.7	519.5	35	519.5	13.3	519.5	0	519.5	0	519.5	0	519.5	0
519	80.6	519	34.9	519	13.2	519	0	519	0	519	0	519	0
518.5	80.4	518.5	34.8	518.5	13.1	518.5	0	518.5	0	518.5	0	518.5	0
518	80.4	518	34.6	518	13	518	0	518	0	518	0	518	0
517.5	80.2	517.5	34.5	517.5	12.9	517.5	0	517.5	0	517.5	0	517.5	0
517	80.1	517	34.3	517	12.8	517	0	517	0	517	0	517	0
516.5	79.9	516.5	34.2	516.5	12.7	516.5	0	516.5	0	516.5	0	516.5	0
516	79.8	516	34	516	12.6	516	0	516	0	516	0	516	0
515.5	79.7	515.5	33.9	515.5	12.5	515.5	0	515.5	0	515.5	0	515.5	0
515	79.6	515	33.7	515	12.4	515	0	515	0	515	0	515	0
514.5	79.5	514.5	33.6	514.5	12.3	514.5	0	514.5	0	514.5	0	514.5	0
514	79.3	514	33.4	514	12.2	514	0	514	0	514	0	514	0
513.5	79.1	513.5	33.2	513.5	12.1	513.5	0	513.5	0	513.5	0	513.5	0
513	78.9	513	33	513	12	513	0	513	0	513	0	513	0
512.5	78.8	512.5	32.9	512.5	11.9	512.5	0	512.5	0	512.5	0	512.5	0
512	78.7	512	32.7	512	11.8	512	0	512	0	512	0	512	0
511.5	78.6	511.5	32.5	511.5	11.7	511.5	0	511.5	0	511.5	0	511.5	0
511	78.4	511	32.4	511	11.6	511	0	511	0	511	0	511	0
510.5	78.3	510.5	32.2	510.5	11.5	510.5	0	510.5	0	510.5	0	510.5	0
510	78.2	510	32	510	11.4	510	0	510	0	510	0	510	0
509.5	78	509.5	31.9	509.5	11.4	509.5	0	509.5	0	509.5	0	509.5	0
509	77.9	509	31.7	509	11.3	509	0	509	0	509	0	509	0
508.5	77.8	508.5	31.6	508.5	11.2	508.5	0	508.5	0	508.5	0	508.5	0
508	77.6	508	31.4	508	11.1	508	0	508	0	508	0	508	0
507.5	77.5	507.5	31.2	507.5	11	507.5	0	507.5	0	507.5	0	507.5	0
507	77.3	507	31.1	507	10.9	507	0	507	0	507	0	507	0
506.5	77.1	506.5	30.9	506.5	10.8	506.5	0	506.5	0	506.5	0	506.5	0
506	77	506	30.8	506	10.7	506	0	506	0	506	0	506	0
505.5	76.8	505.5	30.6	505.5	10.6	505.5	0	505.5	0	505.5	0	505.5	0
505	76.7	505	30.4	505	10.5	505	0	505	0	505	0	505	0
504.5	76.5	504.5	30.2	504.5	10.4	504.5	0	504.5	0	504.5	0	504.5	0
504	76.3	504	30	504	10.3	504	0	504	0	504	0	504	0
503.5	76.1	503.5	29.9	503.5	10.2	503.5	0	503.5	0	503.5	0	503.5	0
503	76	503	29.7	503	10.1	503	0	503	0	503	0	503	0
502.5	75.8	502.5	29.5	502.5	10	502.5	0	502.5	0	502.5	0	502.5	0
502	75.7	502	29.3	502	9.9	502	0	502	0	502	0	502	0
501.5	75.5	501.5	29.2	501.5	9.8	501.5	0	501.5	0	501.5	0	501.5	0
501	75.3	501	29	501	9.8	501	0	501	0	501	0	501	0
500.5	75.1	500.5	28.8	500.5	9.7	500.5	0	500.5	0	500.5	0	500.5	0
500	75	500	28.7	500	9.6	500	0	500	0	500	0	500	0
499.5	74.8	499.5	28.5	499.5	9.5	499.5	0	499.5	0	499.5	0	499.5	0
499	74.7	499	28.3	499	9.4	499	0	499	0	499	0	499	0
498.5	74.5	498.5	28.2	498.5	9.3	498.5	0	498.5	0	498.5	0	498.5	0
498	74.2	498	28	498	9.3	498	0	498	0	498	0	498	0
497.5	74.1	497.5	27.9	497.5	9.2	497.5	0	497.5	0	497.5	0	497.5	0
497	73.9	497	27.7	497	9.1	497	0	497	0	497	0	497	0
496.5	73.7	496.5	27.5	496.5	9	496.5	0	496.5	0	496.5	0	496.5	0
496	73.5	496	27.3	496	8.9	496	0	496	0	496	0	496	0
495.5	73.3	495.5	27.2	495.5	8.8	495.5	0	495.5	0	495.5	0	495.5	0
495	73	495	27	495	8.7	495	0	495	0	495	0	495	0
494.5	72.9	494.5	26.8	494.5	8.6	494.5	0	494.5	0	494.5	0	494.5	0
494	72.7	494	26.6	494	8.5	494	0	494	0	494	0	494	0
493.5	72.5	493.5	26.4	493.5	8.5	493.5	0	493.5	0	493.5	0	493.5	0
493	72.3	493	26.2	493	8.4	493	0	493	0	493	0	493	0
492.5	72.1	492.5	26.1	492.5	8.3	492.5	0	492.5	0	492.5	0	492.5	0
492	71.8	492	25.9	492	8.2	492	0	492	0	492	0	492	0
491.5	71.6	491.5	25.7	491.5	8.1	491.5	0	491.5	0	491.5	0	491.5	0
491	71.3	491	25.5	491	8	491	0	491	0	491	0	491	0
490.5	71.2	490.5	25.3	490.5	8	490.5	0	490.5	0	490.5	0	490.5	0
490	71	490	25.2	490	7.9	490	0	490	0	490	0	490	0
489.5	70.8	489.5	25	489.5	7.8	489.5	0	489.5	0	489.5	0	489.5	0
489	70.5	489	24.8	489	7.7	489	0	489	0	489	0	489	0
488.5	70.3	488.5	24.7	488.5	7.6	488.5	0	488.5	0	488.5	0	488.5	0
488	70.1	488	24.5	488	7.6	488	0	488	0	488	0	488	0
487.5	69.9	487.5	24.3	487.5	7.5	487.5	0	487.5	0	487.5	0	487.5	0
487	69.6	487	24.2	487	7.4	487	0	487	0	487	0	487	0
486.5	69.4	486.5	24	486.5	7.3	486.5	0	486.5	0	486.5	0	486.5	0
486	69.2	486	23.8	486	7.3	486	0	486	0	486	0	486	0
485.5	69	485.5	23.6	485.5	7.2	485.5	0	485.5	0	485.5	0	485.5	0
485	68.7	485	23.5	485	7.1	485	0	485	0	485	0	485	0
484.5	68.5	484.5	23.3	484.5	7	484.5	0	484.5	0	484.5	0	484.5	0
484	68.2	484	23.1	484	6.9	484	0	484	0	484	0	484	0
483.5	68	483.5	22.9	483.5	6.8	483.5	0	483.5	0	483.5	0	483.5	0
483	67.7	483	22.7	483	6.8	483	0	483	0	483	0	483	0
482.5	67.5	482.5	22.6	482.5	6.7	482.5	0	482.5	0	482.5	0	482.5	0
482	67.2	482	22.4	482	6.6	482	0	482	0	482	0	482	0
481.5	67	481.5	22.2	481.5	6.5	481.5	0	481.5	0	481.5	0	481.5	0
481	66.7	481	22	481	6.5	481	0	481	0	481	0	481	0
480.5	66.5	480.5	21.8	480.5	6.4	480.5	0	480.5	0	480.5	0	480.5	0
480	66.2	480	21.7	480	6.3	480	0	480	0	480	0	480	0
479.5	66	479.5	21.5	479.5	6.3	479.5	0	479.5	0	479.5	0	479.5	0
479	65.7	479	21.3	479	6.2	479	0	479	0	479	0	479	0
478.5	65.4	478.5	21.1	478.5	6.1	478.5	0	478.5	0	478.5	0	478.5	0
478	65.2	478	21	478	6	478	0	478	0	478	0	478	0
477.5	65	477.5	20.8	477.5	6	477.5	0	477.5	0	477.5	0	477.5	0
477	64.7	477	20.7	477	5.9	477	0	477	0	477	0	477	0
476.5	64.5	476.5	20.5	476.5	5.8	476.5	0	476.5	0	476.5	0	476.5	0
476	64.2	476	20.3	476	5.7	476	0	476	0	476	0	476	0
475.5	63.9	475.5	20.1	475.5	5.7	475.5	0	475.5	0	475.5	0	475.5	0
475	63.6	475	19.9	475	5.6	475	0	475	0	475	0	475	0
474.5	63.3	474.5	19.7	474.5	5.5	474.5	0	474.5	0	474.5	0	474.5	0
474	62.9	474	19.5	474	5.4	474	0	474	0	474	0	474	0
473.5	62.6	473.5	19.3	473.5	5.4	473.5	0	473.5	0	473.5	0	473.5	0
473	62.3	473	19.2	473	5.3	473	0	473	0	473	0	473	0
472.5	62	472.5	18.9	472.5	5.2	472.5	0	472.5	0	472.5	0	472.5	0
472	61.7	472	18.8	472	5.2	472	0	472	0	472	0	472	0
471.5	61.4	471.5	18.6	471.5	5.1	471.5	0	471.5	0	471.5	0	471.5	0
471	61.1	471	18.4	471	5	471	0	471	0	471	0	471	0
470.5	60.8	470.5	18.2	470.5	5	470.5	0	470.5	0	470.5	0	470.5	0
470	60.5	470	18	470	4.9	470	0	470	0	470	0	470	0
469.5	60.2	469.5	17.9	469.5	4.8	469.5	0	469.5	0	469.5	0	469.5	0
469	59.9	469	17.7	469	4.8	469	0	469	0	469	0	469	0
468.5	59.6	468.5	17.5	468.5	4.7	468.5	0	468.5	0	468.5	0	468.5	0
468	59.3	468	17.4	468	4.6	468	0	468	0	468	0	468	0
467.5	59	467.5	17.2	467.5	4.6	467.5	0	467.5	0	467.5	0	467.5	0
467	58.7	467	17	467	4.5	467	0	467	0	467	0	467	0
466.5	58.4	466.5	16.9	466.5	4.5	466.5	0	466.5	0	466.5	0	466.5	0
466	58	466	16.7	466	4.4	466	0	466	0	466	0	466	0
465.5	57.7	465.5	16.5	465.5	4.3	465.5	0	465.5	0	465.5	0	465.5	0
465	57.3	465	16.3	465	4.2	465	0	465	0	465	0	465	0
464.5	57	464.5	16.1	464.5	4.2	464.5	0	464.5	0	464.5	0	464.5	0
464	56.6	464	15.9	464	4.1	464	0	464	0	464	0	464	0
463.5	56.2	463.5	15.7	463.5	4.1	463.5	0	463.5	0	463.5	0	463.5	0
463	55.9	463	15.6	463	4	463	0	463	0	463	0	463	0
462.5	55.5	462.5	15.4	462.5	3.9	462.5	0	462.5	0	462.5	0	462.5	0
462	55.2	462	15.2	462	3.9	462	0	462	0	462	0	462	0
461.5	54.9	461.5	15	461.5	3.8	461.5	0	461.5	0	461.5	0	461.5	0
461	54.5	461	14.9	461	3.8	461	0	461	0	461	0	461	0
460.5	54.2	460.5	14.7	460.5	3.7	460.5	0	460.5	0	460.5	0	460.5	0
460	53.8	460	14.5	460	3.6	460	0	460	0	460	0	460	0
459.5	53.4	459.5	14.3	459.5	3.6	459.5	0	459.5	0	459.5	0	459.5	0
459	53.1	459	14.2	459	3.5	459	0	459	0	459	0	459	0
458.5	52.7	458.5	14	458.5	3.5	458.5	0	458.5	0	458.5	0	458.5	0
458	52.4	458	13.9	458	3.4	458	0	458	0	458	0	458	0
457.5	52	457.5	13.7	457.5	3.4	457.5	0	457.5	0	457.5	0	457.5	0
457	51.7	457	13.5	457	3.3	457	0	457	0	457	0	457	0
456.5	51.3	456.5	13.4	456.5	3.3	456.5	0	456.5	0	456.5	0	456.5	0
456	50.9	456	13.2	456	3.2	456	0	456	0	456	0	456	0
455.5	50.4	455.5	13	455.5	3.1	455.5	0	455.5	0	455.5	0	455.5	0
455	50.1	455	12.8	455	3.1	455	0	455	0	455	0	455	0
454.5	49.6	454.5	12.6	454.5	3	454.5	0	454.5	0	454.5	0	454.5	0
454	49.2	454	12.5	454	3	454	0	454	0	454	0	454	0
453.5	48.9	453.5	12.3	453.5	2.9	453.5	0	453.5	0	453.5	0	453.5	0
453	48.5	453	12.1	453	2.9	453	0	453	0	453	0	453	0
452.5	48.1	452.5	11.9	452.5	2.8	452.5	0	452.5	0	452.5	0	452.5	0
452	47.7	452	11.8	452	2.8	452	0	452	0	452	0	452	0
451.5	47.3	451.5	11.6	451.5	2.7	451.5	0	451.5	0	451.5	0	451.5	0
451	46.8	451	11.4	451	2.7	451	0	451	0	451	0	451	0
450.5	46.5	450.5	11.3	450.5	2.6	450.5	0	450.5	0	450.5	0	450.5	0
450	46.1	450	11.1	450	2.6	450	0	450	0	450	0	450	0
449.5	45.7	449.5	11	449.5	2.5	449.5	0	449.5	0	449.5	0	449.5	0
449	45.3	449	10.8	449	2.4	449	0	449	0	449	0	449	0
448.5	44.9	448.5	10.6	448.5	2.4	448.5	0	448.5	0	448.5	0	448.5	0
448	44.5	448	10.5	448	2.3	448	0	448	0	448	0	448	0
447.5	44.1	447.5	10.3	447.5	2.3	447.5	0	447.5	0	447.5	0	447.5	0
447	43.7	447	10.2	447	2.3	447	0	447	0	447	0	447	0
446.5	43.3	446.5	10	446.5	2.2	446.5	0	446.5	0	446.5	0	446.5	0
446	42.9	446	9.9	446	2.2	446	0	446	0	446	0	446	0
445.5	42.5	445.5	9.7	445.5	2.1	445.5	0	445.5	0	445.5	0	445.5	0
445	42	445	9.5	445	2.1	445	0	445	0	445	0	445	0
444.5	41.5	444.5	9.4	444.5	2	444.5	0	444.5	0	444.5	0	444.5	0
444	41.1	444	9.2	444	2	444	0	444	0	444	0	444	0
443.5	40.6	443.5	9.1	443.5	1.9	443.5	0	443.5	0	443.5	0	443.5	0
443	40.2	443	8.9	443	1.9	443	0	443	0	443	0	443	0
442.5	39.7	442.5	8.7	442.5	1.9	442.5	0	442.5	0	442.5	0	442.5	0
442	39.3	442	8.6	442	1.8	442	0	442	0	442	0	442	0
441.5	38.8	441.5	8.4	441.5	1.8	441.5	0	441.5	0	441.5	0	441.5	0
441	38.3	441	8.2	441	1.7	441	0	441	0	441	0	441	0
440.5	37.9	440.5	8.1	440.5	1.7	440.5	0	440.5	0	440.5	0	440.5	0
440	37.5	440	8	440	1.7	440	0	440	0	440	0	440	0
439.5	37.1	439.5	7.8	439.5	1.6	439.5	0	439.5	0	439.5	0	439.5	0
439	36.7	439	7.7	439	1.6	439	0	439	0	439	0	439	0
438.5	36.3	438.5	7.6	438.5	1.6	438.5	0	438.5	0	438.5	0	438.5	0
438	35.9	438	7.4	438	1.5	438	0	438	0	438	0	438	0
437.5	35.4	437.5	7.3	437.5	1.5	437.5	0	437.5	0	437.5	0	437.5	0
437	35	437	7.1	437	1.5	437	0	437	0	437	0	437	0
436.5	34.5	436.5	7	436.5	1.4	436.5	0	436.5	0	436.5	0	436.5	0
436	34.1	436	6.9	436	1.4	436	0	436	0	436	0	436	0
435.5	33.6	435.5	6.7	435.5	1.3	435.5	0	435.5	0	435.5	0	435.5	0
435	33.2	435	6.6	435	1.3	435	0	435	0	435	0	435	0
434.5	32.7	434.5	6.5	434.5	1.3	434.5	0	434.5	0	434.5	0	434.5	0
434	32.3	434	6.3	434	1.2	434	0	434	0	434	0	434	0
433.5	31.8	433.5	6.2	433.5	1.2	433.5	0	433.5	0	433.5	0	433.5	0
433	31.3	433	6	433	1.2	433	0	433	0	433	0	433	0
432.5	30.8	432.5	5.9	432.5	1.2	432.5	0	432.5	0	432.5	0	432.5	0
432	30.4	432	5.8	432	1.1	432	0	432	0	432	0	432	0
431.5	29.9	431.5	5.6	431.5	1.1	431.5	0	431.5	0	431.5	0	431.5	0
431	29.5	431	5.5	431	1.1	431	0	431	0	431	0	431	0
430.5	29.1	430.5	5.4	430.5	1	430.5	0	430.5	0	430.5	0	430.5	0
430	28.7	430	5.3	430	1	430	0	430	0	430	0	430	0
429.5	28.3	429.5	5.2	429.5	1	429.5	0	429.5	0	429.5	0	429.5	0
429	27.9	429	5.1	429	1	429	0	429	0	429	0	429	0
428.5	27.4	428.5	4.9	428.5	0.9	428.5	0	428.5	0	428.5	0	428.5	0
428	27	428	4.8	428	0.9	428	0	428	0	428	0	428	0
427.5	26.5	427.5	4.7	427.5	0.9	427.5	0	427.5	0	427.5	0	427.5	0
427	26.1	427	4.6	427	0.9	427	0	427	0	427	0	427	0
426.5	25.7	426.5	4.5	426.5	0.8	426.5	0	426.5	0	426.5	0	426.5	0
426	25.2	426	4.4	426	0.8	426	0	426	0	426	0	426	0
425.5	24.8	425.5	4.3	425.5	0.8	425.5	0	425.5	0	425.5	0	425.5	0
425	24.3	425	4.2	425	0.8	425	0	425	0	425	0	425	0
424.5	23.9	424.5	4	424.5	0.7	424.5	0	424.5	0	424.5	0	424.5	0
424	23.4	424	3.9	424	0.7	424	0	424	0	424	0	424	0
423.5	23	423.5	3.8	423.5	0.7	423.5	0	423.5	0	423.5	0	423.5	0
423	22.5	423	3.7	423	0.7	423	0	423	0	423	0	423	0
422.5	22.1	422.5	3.6	422.5	0.6	422.5	0	422.5	0	422.5	0	422.5	0
422	21.7	422	3.5	422	0.6	422	0	422	0	422	0	422	0
421.5	21.2	421.5	3.4	421.5	0.6	421.5	0	421.5	0	421.5	0	421.5	0
421	20.8	421	3.3	421	0.6	421	0	421	0	421	0	421	0
420.5	20.4	420.5	3.2	420.5	0.6	420.5	0	420.5	0	420.5	0	420.5	0
420	20	420	3.1	420	0.5	420	0	420	0	420	0	420	0
419.5	19.6	419.5	3	419.5	0.5	419.5	0	419.5	0	419.5	0	419.5	0
419	19.2	419	3	419	0.5	419	0	419	0	419	0	419	0
418.5	18.8	418.5	2.9	418.5	0.5	418.5	0	418.5	0	418.5	0	418.5	0
418	18.4	418	2.8	418	0.5	418	0	418	0	418	0	418	0
417.5	18	417.5	2.7	417.5	0.5	417.5	0	417.5	0	417.5	0	417.5	0
417	17.7	417	2.6	417	0.4	417	0	417	0	417	0	417	0
416.5	17.2	416.5	2.6	416.5	0.4	416.5	0	416.5	0	416.5	0	416.5	0
416	16.8	416	2.5	416	0.4	416	0	416	0	416	0	416	0
415.5	16.4	415.5	2.4	415.5	0.4	415.5	0	415.5	0	415.5	0	415.5	0
415	16	415	2.3	415	0.4	415	0	415	0	415	0	415	0
414.5	15.6	414.5	2.2	414.5	0.4	414.5	0	414.5	0	414.5	0	414.5	0
414	15.2	414	2.1	414	0.3	414	0	414	0	414	0	414	0
413.5	14.7	413.5	2.1	413.5	0.3	413.5	0	413.5	0	413.5	0	413.5	0
413	14.4	413	2	413	0.3	413	0	413	0	413	0	413	0
412.5	14	412.5	1.9	412.5	0.3	412.5	0	412.5	0	412.5	0	412.5	0
412	13.6	412	1.8	412	0.3	412	0	412	0	412	0	412	0
411.5	13.3	411.5	1.8	411.5	0.3	411.5	0	411.5	0	411.5	0	411.5	0
411	12.9	411	1.7	411	0.3	411	0	411	0	411	0	411	0
410.5	12.5	410.5	1.7	410.5	0.3	410.5	0	410.5	0	410.5	0	410.5	0
410	12.2	410	1.6	410	0.2	410	0	410	0	410	0	410	0
409.5	11.8	409.5	1.5	409.5	0.2	409.5	0	409.5	0	409.5	0	409.5	0
409	11.5	409	1.5	409	0.2	409	0	409	0	409	0	409	0
408.5	11.2	408.5	1.4	408.5	0.2	408.5	0	408.5	0	408.5	0	408.5	0
408	10.9	408	1.4	408	0.2	408	0	408	0	408	0	408	0
407.5	10.5	407.5	1.3	407.5	0.2	407.5	0	407.5	0	407.5	0	407.5	0
407	10.2	407	1.3	407	0.2	407	0	407	0	407	0	407	0
406.5	9.9	406.5	1.2	406.5	0.2	406.5	0	406.5	0	406.5	0	406.5	0
406	9.5	406	1.2	406	0.2	406	0	406	0	406	0	406	0
405.5	9.2	405.5	1.1	405.5	0.2	405.5	0	405.5	0	405.5	0	405.5	0
405	8.9	405	1.1	405	0.1	405	0	405	0	405	0	405	0
404.5	8.6	404.5	1	404.5	0.1	404.5	0	404.5	0	404.5	0	404.5	0
404	8.3	404	1	404	0.1	404	0	404	0	404	0	404	0
403.5	7.9	403.5	0.9	403.5	0.1	403.5	0	403.5	0	403.5	0	403.5	0
403	7.7	403	0.9	403	0.1	403	0	403	0	403	0	403	0
402.5	7.3	402.5	0.8	402.5	0.1	402.5	0	402.5	0	402.5	0	402.5	0
402	7.1	402	0.8	402	0.1	402	0	402	0	402	0	402	0
401.5	6.8	401.5	0.7	401.5	0.1	401.5	0	401.5	0	401.5	0	401.5	0
401	6.6	401	0.7	401	0.1	401	0	401	0	401	0	401	0
400.5	6.3	400.5	0.7	400.5	0.1	400.5	0	400.5	0	400.5	0	400.5	0
400	6.1	400	0.6	400	0.1	400	0	400	0	400	0	400	0
399.5	5.8	399.5	0.6	399.5	0.1	399.5	0	399.5	0	399.5	0	399.5	0
399	5.6	399	0.6	399	0.1	399	0	399	0	399	0	399	0
398.5	5.4	398.5	0.6	398.5	0.1	398.5	0	398.5	0	398.5	0	398.5	0
398	5.1	398	0.5	398	0.1	398	0	398	0	398	0	398	0
397.5	4.9	397.5	0.5	397.5	0.1	397.5	0	397.5	0	397.5	0	397.5	0
397	4.7	397	0.5	397	0.1	397	0	397	0	397	0	397	0
396.5	4.5	396.5	0.4	396.5	0	396.5	0	396.5	0	396.5	0	396.5	0
396	4.3	396	0.4	396	0	396	0	396	0	396	0	396	0
395.5	4.1	395.5	0.4	395.5	0	395.5	0	395.5	0	395.5	0	395.5	0
395	3.9	395	0.4	395	0	395	0	395	0	395	0	395	0
394.5	3.7	394.5	0.4	394.5	0	394.5	0	394.5	0	394.5	0	394.5	0
394	3.5	394	0.3	394	0	394	0	394	0	394	0	394	0
393.5	3.4	393.5	0.3	393.5	0	393.5	0	393.5	0	393.5	0	393.5	0
393	3.2	393	0.3	393	0	393	0	393	0	393	0	393	0
392.5	3	392.5	0.3	392.5	0	392.5	0	392.5	0	392.5	0	392.5	0
392	2.9	392	0.3	392	0	392	0	392	0	392	0	392	0
391.5	2.7	391.5	0.2	391.5	0	391.5	0	391.5	0	391.5	0	391.5	0
391	2.6	391	0.2	391	0	391	0	391	0	391	0	391	0
390.5	2.5	390.5	0.2	390.5	0	390.5	0	390.5	0	390.5	0	390.5	0
390	2.4	390	0.2	390	0	390	0	390	0	390	0	390	0
389.5	2.2	389.5	0.2	389.5	0	389.5	0	389.5	0	389.5	0	389.5	0
389	2.1	389	0.2	389	0	389	0	389	0	389	0	389	0
388.5	2	388.5	0.2	388.5	0	388.5	0	388.5	0	388.5	0	388.5	0
388	1.9	388	0.2	388	0	388	0	388	0	388	0	388	0
387.5	1.8	387.5	0.1	387.5	0	387.5	0	387.5	0	387.5	0	387.5	0
387	1.7	387	0.1	387	0	387	0	387	0	387	0	387	0
386.5	1.7	386.5	0.1	386.5	0	386.5	0	386.5	0	386.5	0	386.5	0
386	1.6	386	0.1	386	0	386	0	386	0	386	0	386	0
385.5	1.5	385.5	0.1	385.5	0	385.5	0	385.5	0	385.5	0	385.5	0
385	1.4	385	0.1	385	0	385	0	385	0	385	0	385	0
384.5	1.3	384.5	0.1	384.5	0	384.5	0	384.5	0	384.5	0	384.5	0
384	1.3	384	0.1	384	0	384	0	384	0	384	0	384	0
383.5	1.2	383.5	0.1	383.5	0	383.5	0	383.5	0	383.5	0	383.5	0
383	1.1	383	0.1	383	0	383	0	383	0	383	0	383	0
382.5	1.1	382.5	0.1	382.5	0	382.5	0	382.5	0	382.5	0	382.5	0
382	1	382	0.1	382	0	382	0	382	0	382	0	382	0
381.5	1	381.5	0.1	381.5	0	381.5	0	381.5	0	381.5	0	381.5	0
381	0.9	381	0.1	381	0	381	0	381	0	381	0	381	0
380.5	0.9	380.5	0.1	380.5	0	380.5	0	380.5	0	380.5	0	380.5	0
380	0.8	380	0.1	380	0	380	0	380	0	380	0	380	0
379.5	0.8	379.5	0	379.5	0	379.5	0	379.5	0	379.5	0	379.5	0
379	0.7	379	0	379	0	379	0	379	0	379	0	379	0
378.5	0.7	378.5	0	378.5	0	378.5	0	378.5	0	378.5	0	378.5	0
378	0.6	378	0	378	0	378	0	378	0	378	0	378	0
377.5	0.6	377.5	0	377.5	0	377.5	0	377.5	0	377.5	0	377.5	0
377	0.6	377	0	377	0	377	0	377	0	377	0	377	0
376.5	0.6	376.5	0	376.5	0	376.5	0	376.5	0	376.5	0	376.5	0
376	0.5	376	0	376	0	376	0	376	0	376	0	376	0
375.5	0.5	375.5	0	375.5	0	375.5	0	375.5	0	375.5	0	375.5	0
375	0.5	375	0	375	0	375	0	375	0	375	0	375	0
374.5	0.4	374.5	0	374.5	0	374.5	0	374.5	0	374.5	0	374.5	0
374	0.4	374	0	374	0	374	0	374	0	374	0	374	0
373.5	0.4	373.5	0	373.5	0	373.5	0	373.5	0	373.5	0	373.5	0
373	0.4	373	0	373	0	373	0	373	0	373	0	373	0
372.5	0.3	372.5	0	372.5	0	372.5	0	372.5	0	372.5	0	372.5	0
372	0.3	372	0	372	0	372	0	372	0	372	0	372	0
371.5	0.3	371.5	0	371.5	0	371.5	0	371.5	0	371.5	0	371.5	0
371	0.3	371	0	371	0	371	0	371	0	371	0	371	0
370.5	0.3	370.5	0	370.5	0	370.5	0	370.5	0	370.5	0	370.5	0
370	0.2	370	0	370	0	370	0	370	0	370	0	370	0
369.5	0.2	369.5	0	369.5	0	369.5	0	369.5	0	369.5	0	369.5	0
369	0.2	369	0	369	0	369	0	369	0	369	0	369	0
368.5	0.2	368.5	0	368.5	0	368.5	0	368.5	0	368.5	0	368.5	0
368	0.2	368	0	368	0	368	0	368	0	368	0	368	0
367.5	0.2	367.5	0	367.5	0	367.5	0	367.5	0	367.5	0	367.5	0
367	0.1	367	0	367	0	367	0	367	0	367	0	367	0
366.5	0.1	366.5	0	366.5	0	366.5	0	366.5	0	366.5	0	366.5	0
366	0.1	366	0	366	0	366	0	366	0	366	0	366	0
365.5	0.1	365.5	0	365.5	0	365.5	0	365.5	0	365.5	0	365.5	0
365	0.1	365	0	365	0	365	0	365	0	365	0	365	0
364.5	0.1	364.5	0	364.5	0	364.5	0	364.5	0	364.5	0	364.5	0
364	0.1	364	0	364	0	364	0	364	0	364	0	364	0
363.5	0.1	363.5	0	363.5	0	363.5	0	363.5	0	363.5	0	363.5	0
363	0.1	363	0	363	0	363	0	363	0	363	0	363	0
362.5	0.1	362.5	0	362.5	0	362.5	0	362.5	0	362.5	0	362.5	0
362	0	362	0	362	0	362	0	362	0	362	0	362	0
361.5	0	361.5	0	361.5	0	361.5	0	361.5	0	361.5	0	361.5	0
361	0	361	0	361	0	361	0	361	0	361	0	361	0
360.5	0	360.5	0	360.5	0	360.5	0	360.5	0	360.5	0	360.5	0
360	0	360	0	360	0	360	0	360	0	360	0	360	0
359.5	0	359.5	0	359.5	0	359.5	0	359.5	0	359.5	0	359.5	0
359	0	359	0	359	0	359	0	359	0	359	0	359	0
358.5	0	358.5	0	358.5	0	358.5	0	358.5	0	358.5	0	358.5	0
358	0	358	0	358	0	358	0	358	0	358	0	358	0
357.5	0	357.5	0	357.5	0	357.5	0	357.5	0	357.5	0	357.5	0
357	0	357	0	357	0	357	0	357	0	357	0	357	0
356.5	0	356.5	0	356.5	0	356.5	0	356.5	0	356.5	0	356.5	0
356	0	356	0	356	0	356	0	356	0	356	0	356	0
355.5	0	355.5	0	355.5	0	355.5	0	355.5	0	355.5	0	355.5	0
355	0	355	0	355	0	355	0	355	0	355	0	355	0
354.5	0	354.5	0	354.5	0	354.5	0	354.5	0	354.5	0	354.5	0
354	0	354	0	354	0	354	0	354	0	354	0	354	0
353.5	0	353.5	0	353.5	0	353.5	0	353.5	0	353.5	0	353.5	0
353	0	353	0	353	0	353	0	353	0	353	0	353	0
352.5	0	352.5	0	352.5	0	352.5	0	352.5	0	352.5	0	352.5	0
352	0	352	0	352	0	352	0	352	0	352	0	352	0
351.5	0	351.5	0	351.5	0	351.5	0	351.5	0	351.5	0	351.5	0
351	0	351	0	351	0	351	0	351	0	351	0	351	0
350.5	0	350.5	0	350.5	0	350.5	0	350.5	0	350.5	0	350.5	0
350	0	350	0	350	0	350	0	350	0	350	0	350	0
349.5	0	349.5	0	349.5	0	349.5	0	349.5	0	349.5	0	349.5	0
349	0	349	0	349	0	349	0	349	0	349	0	349	0
348.5	0	348.5	0	348.5	0	348.5	0	348.5	0	348.5	0	348.5	0
348	0	348	0	348	0	348	0	348	0	348	0	348	0
347.5	0	347.5	0	347.5	0	347.5	0	347.5	0	347.5	0	347.5	0
347	0	347	0	347	0	347	0	347	0	347	0	347	0
346.5	0	346.5	0	346.5	0	346.5	0	346.5	0	346.5	0	346.5	0
346	0	346	0	346	0	346	0	346	0	346	0	346	0
345.5	0	345.5	0	345.5	0	345.5	0	345.5	0	345.5	0	345.5	0
345	0	345	0	345	0	345	0	345	0	345	0	345	0
344.5	0	344.5	0	344.5	0	344.5	0	344.5	0	344.5	0	344.5	0
344	0	344	0	344	0	344	0	344	0	344	0	344	0
343.5	0	343.5	0	343.5	0	343.5	0	343.5	0	343.5	0	343.5	0
343	0	343	0	343	0	343	0	343	0	343	0	343	0
342.5	0	342.5	0	342.5	0	342.5	0	342.5	0	342.5	0	342.5	0
342	0	342	0	342	0	342	0	342	0	342	0	342	0
341.5	0	341.5	0	341.5	0	341.5	0	341.5	0	341.5	0	341.5	0
341	0	341	0	341	0	341	0	341	0	341	0	341	0
340.5	0	340.5	0	340.5	0	340.5	0	340.5	0	340.5	0	340.5	0
340	0	340	0	340	0	340	0	340	0	340	0	340	0
339.5	0	339.5	0	339.5	0	339.5	0	339.5	0	339.5	0	339.5	0
339	0	339	0	339	0	339	0	339	0	339	0	339	0
338.5	0	338.5	0	338.5	0	338.5	0	338.5	0	338.5	0	338.5	0
338	0	338	0	338	0	338	0	338	0	338	0	338	0
337.5	0	337.5	0	337.5	0	337.5	0	337.5	0	337.5	0	337.5	0
337	0	337	0	337	0	337	0	337	0	337	0	337	0
336.5	0	336.5	0	336.5	0	336.5	0	336.5	0	336.5	0	336.5	0
336	0	336	0	336	0	336	0	336	0	336	0	336	0
335.5	0	335.5	0	335.5	0	335.5	0	335.5	0	335.5	0	335.5	0
335	0	335	0	335	0	335	0	335	0	335	0	335	0
334.5	0	334.5	0	334.5	0	334.5	0	334.5	0	334.5	0	334.5	0
334	0	334	0	334	0	334	0	334	0	334	0	334	0
333.5	0	333.5	0	333.5	0	333.5	0	333.5	0	333.5	0	333.5	0
333	0	333	0	333	0	333	0	333	0	333	0	333	0
332.5	0	332.5	0	332.5	0	332.5	0	332.5	0	332.5	0	332.5	0
332	0	332	0	332	0	332	0	332	0	332	0	332	0
331.5	0	331.5	0	331.5	0	331.5	0	331.5	0	331.5	0	331.5	0
331	0	331	0	331	0	331	0	331	0	331	0	331	0
330.5	0	330.5	0	330.5	0	330.5	0	330.5	0	330.5	0	330.5	0
330	0	330	0	330	0	330	0	330	0	330	0	330	0
329.5	0	329.5	0	329.5	0	329.5	0	329.5	0	329.5	0	329.5	0
329	0	329	0	329	0	329	0	329	0	329	0	329	0
328.5	0	328.5	0	328.5	0	328.5	0	328.5	0	328.5	0	328.5	0
328	0	328	0	328	0	328	0	328	0	328	0	328	0
327.5	0	327.5	0	327.5	0	327.5	0	327.5	0	327.5	0	327.5	0
327	0	327	0	327	0	327	0	327	0	327	0	327	0
326.5	0	326.5	0	326.5	0	326.5	0	326.5	0	326.5	0	326.5	0
326	0	326	0	326	0	326	0	326	0	326	0	326	0
325.5	0	325.5	0	325.5	0	325.5	0	325.5	0	325.5	0	325.5	0
325	0	325	0	325	0	325	0	325	0	325	0	325	0
324.5	0	324.5	0	324.5	0	324.5	0	324.5	0	324.5	0	324.5	0
324	0	324	0	324	0	324	0	324	0	324	0	324	0
323.5	0	323.5	0	323.5	0	323.5	0	323.5	0	323.5	0	323.5	0
323	0	323	0	323	0	323	0	323	0	323	0	323	0
322.5	0	322.5	0	322.5	0	322.5	0	322.5	0	322.5	0	322.5	0
322	0	322	0	322	0	322	0	322	0	322	0	322	0
321.5	0	321.5	0	321.5	0	321.5	0	321.5	0	321.5	0	321.5	0
321	0	321	0	321	0	321	0	321	0	321	0	321	0
320.5	0	320.5	0	320.5	0	320.5	0	320.5	0	320.5	0	320.5	0
320	0	320	0	320	0	320	0	320	0	320	0	320	0
319.5	0	319.5	0	319.5	0	319.5	0	319.5	0	319.5	0	319.5	0
319	0	319	0	319	0	319	0	319	0	319	0	319	0
318.5	0	318.5	0	318.5	0	318.5	0	318.5	0	318.5	0	318.5	0
318	0	318	0	318	0	318	0	318	0	318	0	318	0
317.5	0	317.5	0	317.5	0	317.5	0	317.5	0	317.5	0	317.5	0
317	0	317	0	317	0	317	0	317	0	317	0	317	0
316.5	0	316.5	0	316.5	0	316.5	0	316.5	0	316.5	0	316.5	0
316	0	316	0	316	0	316	0	316	0	316	0	316	0
315.5	0	315.5	0	315.5	0	315.5	0	315.5	0	315.5	0	315.5	0
315	0	315	0	315	0	315	0	315	0	315	0	315	0
314.5	0	314.5	0	314.5	0	314.5	0	314.5	0	314.5	0	314.5	0
314	0	314	0	314	0	314	0	314	0	314	0	314	0
313.5	0	313.5	0	313.5	0	313.5	0	313.5	0	313.5	0	313.5	0
313	0	313	0	313	0	313	0	313	0	313	0	313	0
312.5	0	312.5	0	312.5	0	312.5	0	312.5	0	312.5	0	312.5	0
312	0	312	0	312	0	312	0	312	0	312	0	312	0
311.5	0	311.5	0	311.5	0	311.5	0	311.5	0	311.5	0	311.5	0
311	0	311	0	311	0	311	0	311	0	311	0	311	0
310.5	0	310.5	0	310.5	0	310.5	0	310.5	0	310.5	0	310.5	0
310	0	310	0	310	0	310	0	310	0	310	0	310	0
309.5	0	309.5	0	309.5	0	309.5	0	309.5	0	309.5	0	309.5	0
309	0	309	0	309	0	309	0	309	0	309	0	309	0
308.5	0	308.5	0	308.5	0	308.5	0	308.5	0	308.5	0	308.5	0
308	0	308	0	308	0	308	0	308	0	308	0	308	0
307.5	0	307.5	0	307.5	0	307.5	0	307.5	0	307.5	0	307.5	0
307	0	307	0	307	0	307	0	307	0	307	0	307	0
306.5	0	306.5	0	306.5	0	306.5	0	306.5	0	306.5	0	306.5	0
306	0	306	0	306	0	306	0	306	0	306	0	306	0
305.5	0	305.5	0	305.5	0	305.5	0	305.5	0	305.5	0	305.5	0
305	0	305	0	305	0	305	0	305	0	305	0	305	0
304.5	0	304.5	0	304.5	0	304.5	0	304.5	0	304.5	0	304.5	0
304	0	304	0	304	0	304	0	304	0	304	0	304	0
303.5	0	303.5	0	303.5	0	303.5	0	303.5	0	303.5	0	303.5	0
303	0	303	0	303	0	303	0	303	0	303	0	303	0
302.5	0	302.5	0	302.5	0	302.5	0	302.5	0	302.5	0	302.5	0
302	0	302	0	302	0	302	0	302	0	302	0	302	0
301.5	0	301.5	0	301.5	0	301.5	0	301.5	0	301.5	0	301.5	0
301	0	301	0	301	0	301	0	301	0	301	0	301	0
300.5	0	300.5	0	300.5	0	300.5	0	300.5	0	300.5	0	300.5	0
300	0	300	0	300	0	300	0	300	0	300	0	300	0
299.5	0	299.5	0	299.5	0	299.5	0	299.5	0	299.5	0	299.5	0
299	0	299	0	299	0	299	0	299	0	299	0	299	0
298.5	0	298.5	0	298.5	0	298.5	0	298.5	0	298.5	0	298.5	0
298	0	298	0	298	0	298	0	298	0	298	0	298	0
297.5	0	297.5	0	297.5	0	297.5	0	297.5	0	297.5	0	297.5	0
297	0	297	0	297	0	297	0	297	0	297	0	297	0
296.5	0	296.5	0	296.5	0	296.5	0	296.5	0	296.5	0	296.5	0
296	0	296	0	296	0	296	0	296	0	296	0	296	0
295.5	0	295.5	0	295.5	0	295.5	0	295.5	0	295.5	0	295.5	0
295	0	295	0	295	0	295	0	295	0	295	0	295	0
294.5	0	294.5	0	294.5	0	294.5	0	294.5	0	294.5	0	294.5	0
294	0	294	0	294	0	294	0	294	0	294	0	294	0
293.5	0	293.5	0	293.5	0	293.5	0	293.5	-0.1	293.5	0	293.5	0
293	0	293	0	293	0	293	0	293	0	293	-0.1	293	0
292.5	0	292.5	0	292.5	0	292.5	-0.1	292.5	0	292.5	0	292.5	0
292	0.1	292	0.1	292	0	292	-0.1	292	0	292	0	292	0.1
291.5	0	291.5	0.1	291.5	0	291.5	0	291.5	0	291.5	0	291.5	0.1
291	0	291	0	291	0	291	0	291	0	291	0	291	0.1
290.5	0	290.5	0	290.5	0	290.5	0	290.5	0	290.5	0	290.5	0
290	0	290	0	290	0	290	0	290	0	290	-0.1	290	0
289.5	0	289.5	0	289.5	0	289.5	0	289.5	0	289.5	0	289.5	0
289	0	289	0	289	0	289	0	289	0	289	0	289	0
288.5	0	288.5	0	288.5	0	288.5	0	288.5	0	288.5	0	288.5	0
288	0	288	0	288	0	288	0	288	0	288	0	288	0
287.5	0.1	287.5	0	287.5	0.1	287.5	0	287.5	0	287.5	-0.1	287.5	0
287	0.2	287	0	287	0.4	287	-0.1	287	0.1	287	-0.1	287	0
286.5	0	286.5	-0.1	286.5	0.5	286.5	-0.1	286.5	0.1	286.5	0	286.5	0.1
286	0.2	286	-0.1	286	0.4	286	0	286	0.2	286	-0.2	286	0.1
285.5	0.2	285.5	0.4	285.5	-0.1	285.5	0.1	285.5	0.5	285.5	0	285.5	-0.1
285	0.1	285	0.7	285	-1	285	-0.1	285	0.3	285	-0.1	285	0.3
284.5	0.6	284.5	0	284.5	-2	284.5	0.4	284.5	0.1	284.5	-0.1	284.5	0.9
284	0.3	284	-0.3	284	-2.5	284	0.9	284	1	284	1.4	284	0.2
283.5	-0.4	283.5	-0.3	283.5	-2.5	283.5	1.2	283.5	0.9	283.5	1.2	283.5	-0.3
283	-0.3	283	0.4	283	-1.8	283	2.1	283	0.9	283	1.3	283	-1.7
282.5	1.1	282.5	0.3	282.5	-0.1	282.5	0.8	282.5	2.7	282.5	0.6	282.5	-1.7
282	-1.1	282	0.7	282	1.8	282	-1.1	282	2.5	282	-0.4	282	1.9
281.5	-0.5	281.5	-0.5	281.5	4.3	281.5	-1.5	281.5	3.2	281.5	-0.9	281.5	3
281	-0.6	281	1.4	281	6.3	281	-1.5	281	1.4	281	0.2	281	2.6
280.5	-0.1	280.5	2.6	280.5	7.8	280.5	1.2	280.5	-2.7	280.5	-0.1	280.5	-0.9
280	-1.2	280	1.6	280	8.5	280	2.3	280	-7.1	280	0.1	280	-2.5
279.5	0.9	279.5	0.5	279.5	7.6	279.5	1.4	279.5	-9.7	279.5	1.1	279.5	-2.4
279	-1.9	279	0.2	279	5	279	-2	279	-9.1	279	3.4	279	1.5
278.5	-2.6	278.5	-1	278.5	2.3	278.5	2.8	278.5	-7.4	278.5	7.3	278.5	-2.2
278	-0.9	278	3.3	278	-0.6	278	4.8	278	-3.1	278	6.4	278	2.5
277.5	3.3	277.5	6.8	277.5	-2.1	277.5	1.8	277.5	-1	277.5	4.4	277.5	1.4
277	3.9	277	4.2	277	-2.2	277	-2.1	277	2.2	277	0.2	277	4.4
276.5	3.8	276.5	1.8	276.5	-1.4	276.5	-2.9	276.5	0.1	276.5	-4	276.5	4.6
276	0.9	276	-4.6	276	0.3	276	-8.9	276	0.2	276	-4.1	276	4.2
275.5	-6.2	275.5	-9.6	275.5	2	275.5	-2.3	275.5	0.2	275.5	-1.9	275.5	-4.2
275	-7.2	275	-8.2	275	1.6	275	-2.8	275	1	275	-2.4	275	-8.2
274.5	-2.9	274.5	-5.9	274.5	0.7	274.5	-8.1	274.5	-1.2	274.5	3.7	274.5	-9.9
274	3	274	-4.6	274	-0.3	274	-6.2	274	-2.4	274	4.1	274	-12.7
273.5	6.1	273.5	1.1	273.5	-0.4	273.5	-4.3	273.5	-5.2	273.5	5.5	273.5	-10.2
273	8.6	273	3.5	273	0.5	273	-4	273	-3.5	273	4.1	273	-3.9
272.5	5.7	272.5	5.5	272.5	0.3	272.5	0.6	272.5	-2.2	272.5	-0.1	272.5	-4.2
272	4.5	272	7.7	272	-1.7	272	3.3	272	-4.1	272	-1	272	-0.6
271.5	7.4	271.5	2.1	271.5	-3.6	271.5	4.1	271.5	0.2	271.5	5.1	271.5	4.2
271	7.1	271	1.5	271	-6.1	271	2.4	271	2.1	271	0	271	-0.3
270.5	4.3	270.5	-0.2	270.5	-7.8	270.5	-1	270.5	5.8	270.5	-1.2	270.5	0.8
270	4.8	270	2.3	270	-8.9	270	-2.9	270	6.1	270	-10.5	270	-0.9
269.5	2.7	269.5	7.8	269.5	-9.4	269.5	0	269.5	4.8	269.5	-16.4	269.5	-5.4
269	2.1	269	11.8	269	-7.2	269	-2.4	269	1.2	269	-17.2	269	-3.3
268.5	2	268.5	6.5	268.5	-3.5	268.5	-12	268.5	5.3	268.5	-17.5	268.5	0.1
268	-2.8	268	5.6	268	-2.2	268	-17.7	268	3.5	268	-17	268	1
267.5	-0.9	267.5	-0.7	267.5	-3.4	267.5	-13.6	267.5	0.9	267.5	-8.1	267.5	0.4
267	3.7	267	-3.3	267	-6	267	-9.3	267	-4.8	267	-4.5	267	1
266.5	5.4	266.5	-1.8	266.5	-8.7	266.5	7.4	266.5	-2.7	266.5	-0.2	266.5	-4.5
266	3.6	266	-2.6	266	-9.2	266	8.6	266	-6.8	266	2.1	266	-4.3
265.5	-1.7	265.5	-2.3	265.5	-8.9	265.5	7.1	265.5	-5.4	265.5	-0.5	265.5	-3
265	-4.8	265	-2.5	265	-8.7	265	5.1	265	-9.4	265	1.3	265	1.1
264.5	-5.8	264.5	-2.1	264.5	-7.2	264.5	3.9	264.5	-6.4	264.5	3.9	264.5	-0.5
264	-8.8	264	-3.2	264	-4.6	264	-2.6	264	0.6	264	4.1	264	0.2
263.5	-6.2	263.5	-3.8	263.5	-1.6	263.5	0.9	263.5	7.2	263.5	2.8	263.5	-3.3
263	-3.4	263	-6.1	263	0.7	263	1.7	263	5.6	263	1.2	263	5.2
262.5	-0.4	262.5	-1.8	262.5	1.3	262.5	4.9	262.5	6.4	262.5	-3.3	262.5	3.2
262	2.8	262	3.4	262	1.2	262	1	262	3.6	262	-5.9	262	5.3
261.5	0.4	261.5	4.9	261.5	1.3	261.5	-1.8	261.5	2.6	261.5	-6.3	261.5	0.9
261	-3.9	261	4.4	261	0.8	261	-4.4	261	0.3	261	-3.5	261	-3.6
260.5	-2.7	260.5	0.7	260.5	0.2	260.5	-2.1	260.5	-5.7	260.5	-1	260.5	-5.5
260	0.2	260	-0.2	260	0.1	260	1.7	260	-12.5	260	2.7	260	-5.9
259.5	2.4	259.5	1	259.5	0.4	259.5	3.7	259.5	-10.4	259.5	2.6	259.5	-9.7
259	0.6	259	5.7	259	1.1	259	5	259	-2.7	259	-2.3	259	-10.9
258.5	-0.7	258.5	6.6	258.5	2.5	258.5	-4.4	258.5	-0.9	258.5	-5	258.5	-9.2
258	-5.2	258	6.3	258	3.3	258	-9.1	258	1.5	258	-10	258	-4.7
257.5	-4.2	257.5	-0.2	257.5	3.8	257.5	-11	257.5	-0.7	257.5	-8.2	257.5	-0.1
257	-4.8	257	-1.2	257	3.3	257	-9.7	257	-9.7	257	-2.9	257	-0.3
256.5	-2.8	256.5	-2.8	256.5	1.1	256.5	-7.1	256.5	-10.1	256.5	1.9	256.5	0.2
256	-4.3	256	-4.5	256	-2.4	256	3.3	256	-7.5	256	2.9	256	-0.4
255.5	-2.5	255.5	-3.1	255.5	-5.8	255.5	0.7	255.5	-4.5	255.5	4.1	255.5	1.1
255	-1.9	255	-0.2	255	-8.5	255	-2.2	255	-0.2	255	2.9	255	1.3
254.5	2.8	254.5	1.6	254.5	-8.8	254.5	-3.4	254.5	3	254.5	3.2	254.5	-0.8
254	-0.6	254	3.2	254	-6.9	254	1.2	254	0	254	2	254	-1.6
253.5	-3.7	253.5	6.2	253.5	-2.2	253.5	-1.3	253.5	-1.1	253.5	-2	253.5	-5.9
253	-8.5	253	-0.4	253	2.8	253	-1	253	-0.3	253	-3.7	253	-3.4
252.5	-6.6	252.5	-2.8	252.5	7.2	252.5	-0.4	252.5	-1	252.5	-0.8	252.5	-4.3
252	-6.7	252	-3.1	252	8.5	252	-4.1	252	-2.4	252	0	252	-3.8
251.5	-2.9	251.5	0.2	251.5	6.4	251.5	-2.3	251.5	-1.1	251.5	1.5	251.5	-3.3
251	-3.1	251	5	251	2.2	251	1.9	251	0	251	1.1	251	-2.3
250.5	-1.9	250.5	8.6	250.5	-1.1	250.5	-0.3	250.5	2	250.5	-1.1	250.5	-1.9
250	0.9	250	7.2	250	-3	250	-3.2	250	6.6	250	-1.4	250	2.2
249.5	5.8	249.5	3.4	249.5	-1.8	249.5	-0.4	249.5	3.5	249.5	1.2	249.5	4.3
249	2.6	249	-1	249	1.1	249	-0.2	249	1.6	249	0	249	4.8
248.5	2.6	248.5	-3.1	248.5	4.9	248.5	2	248.5	-3.5	248.5	0.7	248.5	6.6
248	1.2	248	-0.5	248	7.4	248	0.1	248	-4.4	248	-2.6	248	5.9
247.5	-0.6	247.5	-0.9	247.5	8	247.5	-2.4	247.5	-2.8	247.5	-2	247.5	4.5
247	-0.3	247	2.1	247	6.1	247	-2.5	247	2.1	247	-2.4	247	2
246.5	-0.6	246.5	1.9	246.5	3.7	246.5	-2.4	246.5	2.5	246.5	-1.2	246.5	1.8
246	1.2	246	1.6	246	0.4	246	-4.1	246	2.4	246	1.2	246	-1.1
245.5	2.6	245.5	1.4	245.5	-1	245.5	-4.7	245.5	0.9	245.5	3.2	245.5	-1.9
245	3.1	245	3.4	245	-0.6	245	-4.3	245	1.5	245	5.2	245	-2.1
244.5	2.8	244.5	4	244.5	0.6	244.5	-3.7	244.5	1.2	244.5	6.5	244.5	-2.7
244	0.8	244	4	244	1.4	244	-0.4	244	3.4	244	3.5	244	-0.4
243.5	-0.5	243.5	4.2	243.5	1.7	243.5	-0.5	243.5	1.7	243.5	0	243.5	-1
243	2.3	243	3.6	243	0.6	243	3.1	243	1.8	243	-2.3	243	0.2
242.5	2.7	242.5	1.6	242.5	0.1	242.5	4.8	242.5	1.4	242.5	-2	242.5	-3.4
242	2	242	3.6	242	-0.5	242	5.9	242	-1.7	242	0.5	242	-2.7
241.5	4.8	241.5	3.7	241.5	-1	241.5	5.8	241.5	-4.2	241.5	-1.5	241.5	2.1
241	4.4	241	4.5	241	-1.1	241	2.1	241	-3.1	241	-1.8	241	2.7
240.5	4.9	240.5	-0.5	240.5	-0.8	240.5	-0.2	240.5	-2.9	240.5	-0.4	240.5	3.2
240	3	240	-3.9	240	0.5	240	2.5	240	-1.1	240	-0.2	240	1.3
239.5	-3.6	239.5	-7.3	239.5	1.4	239.5	1.9	239.5	-0.4	239.5	1.6	239.5	-2.3
239	-8	239	-3.6	239	0.2	239	1.5	239	-2.2	239	2.6	239	-1.3
238.5	-6.3	238.5	-1.2	238.5	-2.1	238.5	2.5	238.5	1.3	238.5	0.6	238.5	2.4
238	-2.7	238	1.5	238	-4.2	238	-1.6	238	0.8	238	-2.1	238	2.9
237.5	0.3	237.5	-1.2	237.5	-4.8	237.5	-5.3	237.5	-1.8	237.5	-2.9	237.5	4.8
237	1.9	237	-1.6	237	-4.1	237	-7.5	237	-6.3	237	-3.6	237	3.3
236.5	0.7	236.5	-4.9	236.5	-3.4	236.5	-6.9	236.5	-7.8	236.5	-3.5	236.5	4.8
236	2.6	236	-3.7	236	-3.5	236	-3	236	-7.8	236	-3.1	236	1.3
235.5	4.7	235.5	-4.4	235.5	-3.8	235.5	2	235.5	-3.4	235.5	-0.4	235.5	-3
235	3.4	235	-3.4	235	-3.7	235	3.5	235	-3.3	235	-1.1	235	-4.3
234.5	-0.1	234.5	-2.1	234.5	-3.5	234.5	2.9	234.5	-1.1	234.5	-5	234.5	-7
234	2.1	234	4.9	234	-3.1	234	-0.7	234	-4.5	234	-4.8	234	-5.7
233.5	4.1	233.5	8.5	233.5	-2.9	233.5	0.5	233.5	-5.1	233.5	-4.8	233.5	-1.4
233	6.4	233	12	233	-2.1	233	-1.9	233	-8.7	233	-2	233	-1.9
232.5	4	232.5	13	232.5	-0.6	232.5	-3	232.5	-6.5	232.5	-1.7	232.5	0.5
232	-3.8	232	11.2	232	1.3	232	-3	232	-8.4	232	4.1	232	1.7
231.5	-7.3	231.5	4.8	231.5	3.3	231.5	1	231.5	-2.8	231.5	2.1	231.5	1
231	-6.4	231	3.7	231	4.7	231	2.8	231	-2.5	231	-3.8	231	5.9
230.5	-3.5	230.5	1.9	230.5	5.1	230.5	8.3	230.5	0.4	230.5	-7.6	230.5	4.9
230	2	230	2.8	230	4.8	230	1.7	230	-3.4	230	-11.5	230	2.7
229.5	1.8	229.5	5.7	229.5	4.4	229.5	-3.5	229.5	-0.4	229.5	-12.4	229.5	3.6
229	1	229	7.7	229	3.3	229	-4	229	-5	229	-4.1	229	1.9
228.5	-1.1	228.5	6.4	228.5	2.9	228.5	-3.6	228.5	1.1	228.5	-1	228.5	1.7
228	-4.3	228	6.2	228	1.5	228	-3.4	228	1.8	228	-6	228	5.6
227.5	-6.6	227.5	4.7	227.5	-0.8	227.5	0.8	227.5	4.3	227.5	-2.9	227.5	1.7
227	-2.9	227	-1.5	227	-3.1	227	-2.1	227	4.3	227	-3	227	6.3
226.5	-0.2	226.5	-5.2	226.5	-3	226.5	-5.1	226.5	8.7	226.5	3.7	226.5	6.4
226	5.8	226	-9.6	226	-3.2	226	-9	226	3.2	226	6.8	226	6.7
225.5	2.5	225.5	-6.5	225.5	-1.5	225.5	-9.4	225.5	0.1	225.5	5	225.5	5.7
225	3.4	225	-5.3	225	1.7	225	-8.1	225	-4.7	225	0.1	225	-9.6
224.5	-3.7	224.5	-0.8	224.5	3.9	224.5	-2.2	224.5	-5	224.5	3.6	224.5	-20.9
224	-1.1	224	4.8	224	2.7	224	4.6	224	-4.3	224	3.8	224	-26.9
223.5	2.3	223.5	6.2	223.5	0.4	223.5	8.5	223.5	2.7	223.5	7	223.5	-27.8
223	5.5	223	-0.8	223	-5.3	223	3.7	223	3.9	223	6.6	223	-18.3
222.5	2.9	222.5	-2.8	222.5	-10.6	222.5	5.1	222.5	2.3	222.5	2.5	222.5	-7.1
222	6.4	222	-8.9	222	-13.9	222	2.4	222	0.8	222	-8.2	222	-3.8
221.5	7	221.5	-10.7	221.5	-15.7	221.5	4.8	221.5	0.8	221.5	-10.3	221.5	10.2
221	-0.2	221	-0.2	221	-19.9	221	2.9	221	-3.7	221	-10.3	221	7.3
220.5	-18.9	220.5	-1.4	220.5	-23	220.5	0	220.5	1	220.5	-8.3	220.5	-1.4
220	-25.2	220	-8.9	220	-24.4	220	-5.2	220	5.7	220	0.8	220	-6.2
219.5	-27	219.5	-11.8	219.5	-23.5	219.5	-11.5	219.5	8.7	219.5	-1.1	219.5	-14.1
219	-22.4	219	-15	219	-23.2	219	-17.4	219	3.7	219	-4.1	219	-11.7
218.5	-9.2	218.5	-10.9	218.5	-22.5	218.5	-11.9	218.5	0.7	218.5	-5	218.5	3.9
218	-1.8	218	0.3	218	-21.4	218	-7.4	218	-2.4	218	-6.5	218	1.2
217.5	-4.8	217.5	4.5	217.5	-18.1	217.5	4.5	217.5	-0.8	217.5	-9.2	217.5	-7.3
217	1.6	217	6.8	217	-15.4	217	4.4	217	8.5	217	-5.1	217	-10.3
216.5	7.5	216.5	10	216.5	-12.4	216.5	-13.1	216.5	10.6	216.5	-16.5	216.5	-11.5
216	6	216	4.6	216	-10	216	-24.2	216	6.9	216	-4.8	216	-9.7
215.5	12.4	215.5	3.4	215.5	-6.7	215.5	-21.9	215.5	0.7	215.5	-21	215.5	-1.8
215	19.2	215	0.3	215	-1.1	215	-8.5	215	-9	215	-29	215	3.1
214.5	21.3	214.5	-5	214.5	4.2	214.5	9.1	214.5	-14.1	214.5	-28.6	214.5	-5.7
214	12	214	-9.9	214	4.1	214	15.5	214	9.1	214	-23	214	-10.7
213.5	3.8	213.5	-8.9	213.5	-1.6	213.5	6.8	213.5	16.9	213.5	-19	213.5	-12
213	-10.7	213	-7.3	213	-7.9	213	-4.2	213	24.9	213	3.7	213	-9.2
212.5	-7.9	212.5	2	212.5	-11.3	212.5	-7.9	212.5	31.8	212.5	-2.1	212.5	0.9
212	1.1	212	12.3	212	-9.2	212	-2.7	212	17.6	212	0.1	212	13.4
211.5	1.6	211.5	8.7	211.5	-2.4	211.5	-3.1	211.5	4.1	211.5	-4.5	211.5	1
211	-6.8	211	4.2	211	6.1	211	4.4	211	-0.5	211	-2.5	211	-3.9
210.5	-9.5	210.5	2.7	210.5	14	210.5	7.9	210.5	-3.8	210.5	-3	210.5	-2.9
210	-3.3	210	5	210	18.2	210	1.1	210	-23.8	210	0.5	210	-10
209.5	8.8	209.5	1.6	209.5	14.5	209.5	-12.3	209.5	-26.7	209.5	-1.5	209.5	-8.8
209	28.1	209	5.8	209	8.4	209	-14.8	209	-24.1	209	-9.4	209	-10.5
208.5	-1.6	208.5	0.5	208.5	1.7	208.5	-15.2	208.5	-10.1	208.5	-25.6	208.5	-11.2
208	-24.1	208	2.3	208	-3	208	-6.5	208	2.4	208	-21.6	208	-1.9
207.5	-34.3	207.5	6.9	207.5	0.7	207.5	3.2	207.5	21.7	207.5	-5.1	207.5	-0.5
207	-23.3	207	1.3	207	8.1	207	11.4	207	6.5	207	-2.3	207	-5.9
206.5	0.6	206.5	-11.1	206.5	11.6	206.5	8.5	206.5	-0.8	206.5	14.4	206.5	-3.2
206	22.8	206	-5.4	206	11	206	14.5	206	-14.6	206	3.4	206	0.7
205.5	6	205.5	-12.9	205.5	5.3	205.5	4.8	205.5	-23.1	205.5	-6.6	205.5	1
205	-9.1	205	2.4	205	-3.5	205	-9.6	205	-9	205	-13	205	8.3
204.5	-17.5	204.5	-10	204.5	-9.7	204.5	-19.6	204.5	-25.5	204.5	-15.1	204.5	7.4
204	-20	204	-35.3	204	-12.7	204	-32.1	204	-31	204	-19.9	204	13.5
203.5	-8.1	203.5	-37.4	203.5	-12	203.5	-37.7	203.5	-29	203.5	-3	203.5	20.2
203	1.6	203	-24.1	203	-8.6	203	-25.2	203	-33	203	-7.3	203	17.6
202.5	5.8	202.5	-12.7	202.5	-5.5	202.5	-13.8	202.5	-27.2	202.5	8.8	202.5	5.4
202	6.5	202	10.6	202	-1.9	202	3.1	202	3.6	202	17.9	202	7.2
201.5	11.5	201.5	-1.2	201.5	0.2	201.5	13.8	201.5	-19.5	201.5	13.9	201.5	12.7
201	5.9	201	-15.2	201	0.7	201	4.9	201	-25.6	201	13.4	201	19.1
200.5	-12.7	200.5	-17.2	200.5	2.6	200.5	-6.7	200.5	-21.4	200.5	5.3	200.5	18.9
200	-48.9	200	6.2	200	7.9	200	-13.5	200	0	200	-14.3	200	6.1

## Sheet: Fig2e
Storage Modulus	Loss Modulus	Angular Frequency	Storage Modulus	Loss Modulus	Angular Frequency	Storage Modulus	Loss Modulus	Angular Frequency	Storage Modulus	Loss Modulus	Angular Frequency	Storage Modulus	Loss Modulus	Angular Frequency	Storage Modulus	Loss Modulus	Angular Frequency	Storage Modulus	Loss Modulus	Angular Frequency	Storage Modulus	Loss Modulus
[Pa]	[Pa]	[1/s]	[Pa]	[Pa]	[1/s]	[Pa]	[Pa]	[1/s]	[Pa]	[Pa]	[1/s]	[Pa]	[Pa]	[1/s]	[Pa]	[Pa]	[1/s]	[Pa]	[Pa]	[1/s]	[Pa]	[Pa]
pristine-G'	pristine-G''		19-G'	19-G''		25-G'	25-G''		31-G'	31-G''		37-G'	37-G''		43-G'	43-G''		55-G'	55-G''		67-G'	67-G''
100	4200	394	100	2050	27.2	100	3640	26.3	100	5480	693	100	38800	21700	100	91500	101000	100	99200	85100	100	86400	64800
69.5	3580	410	69.5	2710	72.8	69.5	3200	123	69.5	5330	677	69.5	38100	21200	69.5	78500	80200	69.5	87900	69300	69.5	76600	52200
48.3	3370	397	48.3	2990	97.1	48.3	2960	144	48.3	5210	644	48.3	36600	20100	48.3	68200	63800	48.3	78300	56700	48.3	68500	42500
33.6	3340	366	33.6	3160	118	33.6	2890	168	33.6	5070	563	33.6	38500	21200	33.6	59900	51200	33.6	70100	46600	33.6	61600	35000
23.4	3290	273	23.4	3200	103	23.4	2830	154	23.4	4950	497	23.4	37600	19700	23.4	53100	41400	23.4	63200	38600	23.4	56000	29100
16.2	3280	235	16.2	3220	94.3	16.2	2810	144	16.2	4860	444	16.2	35500	17500	16.2	47400	33700	16.2	57300	32200	16.2	51400	24400
11.3	3290	207	11.3	3220	87.4	11.3	2800	136	11.3	4770	397	11.3	33300	15400	11.3	42700	27600	11.3	52400	27100	11.3	47200	20600
7.85	3300	181	7.85	3210	81.7	7.85	2790	130	7.85	4700	358	7.85	31200	13400	7.85	38700	22800	7.85	48100	22800	7.85	43700	17500
5.46	3290	164	5.46	3200	78.4	5.46	2780	125	5.46	4630	323	5.46	29300	11700	5.46	35400	18900	5.46	50100	22000	5.46	40700	14900
3.79	3270	151	3.79	3190	76.8	3.79	2770	121	3.79	4570	295	3.79	27500	10200	3.79	32500	15800	3.79	47300	19000	3.79	38000	12900
2.64	3250	143	2.64	3180	73.4	2.64	2770	119	2.64	4520	270	2.64	26200	9010	2.64	30000	13300	2.64	44100	16400	2.64	35800	11200
1.83	3280	65.7	1.83	3150	93.7	1.83	2750	142	1.83	4300	393	1.83	27000	7130	1.83	27900	11300	1.83	41000	14500	1.83	33900	9680
1.27	3010	105	1.27	3210	148	1.27	2840	185	1.27	4740	1070	1.27	21000	3090	1.27	26200	9830	1.27	39900	13700	1.27	31800	8100
0.886	2770	378	0.886	3280	90.1	0.886	2880	83.1	0.886	5820	1040	0.886	15600	11800	0.886	24900	8170	0.886	39100	10100	0.886	29700	7860
0.616	3580	351	0.616	2990	228	0.616	2620	308	0.616	2660	840	0.616	31100	4270	0.616	22900	7530	0.616	32500	11800	0.616	30200	6340
0.428	3360	596	0.428	3040	317	0.428	2700	397	0.428	2900	2140	0.428	25700	10400	0.428	21900	6820	0.428	31600	12500	0.428	28800	4900
0.298	3980	322	0.298	2820	107	0.298	2380	86.9	0.298	1890	1420	0.298	40000	8680	0.298	20400	5380	0.298	27300	6130	0.298	28800	6600
0.207	2220	196.5	0.207	3410	93.3	0.207	3080	77.8	0.207	7100	1370	0.207	35000	4580	0.207	20600	5230	0.207	36100	8530	0.207	19300	4510
0.144	3680	869	0.144	2880	212	0.144	2410	152	0.144	3180	3030	0.144	33900	21500	0.144	18700	3820	0.144	25900	1210	0.144	29400	14100
0.1	3830	525	0.1	2810	317	0.1	2430	440	0.1	858	1500	0.1	36700	13300	0.1	18200	4510	0.1	23100	10700	0.1	36100	1120

## Sheet: Fig3a
	0.05 M				0.1 M	0.2 M	0.3 M
					--	--	--
3997.6	0.92573	3997.6	3997.6	3997.6	1.92502	2.92339	3.90387
3996.17	0.92635	3996.17	3996.17	3996.17	1.92569	2.92339	3.90387
3994.74	0.92696	3994.74	3994.74	3994.74	1.92635	2.92339	3.90387
3993.31	0.92757	3993.31	3993.31	3993.31	1.927	2.92339	3.90387
3991.89	0.92817	3991.89	3991.89	3991.89	1.92764	2.92339	3.90387
3990.46	0.92876	3990.46	3990.46	3990.46	1.92829	2.92339	3.90387
3989.03	0.92935	3989.03	3989.03	3989.03	1.92892	2.92339	3.90387
3987.6	0.92993	3987.6	3987.6	3987.6	1.92955	2.92339	3.90387
3986.18	0.93051	3986.18	3986.18	3986.18	1.93017	2.92339	3.90387
3984.75	0.93178	3984.75	3984.75	3984.75	1.93138	2.92462	3.90554
3983.32	0.93303	3983.32	3983.32	3983.32	1.93257	2.92583	3.90716
3981.89	0.93427	3981.89	3981.89	3981.89	1.93378	2.92703	3.90876
3980.46	0.93547	3980.46	3980.46	3980.46	1.93503	2.92823	3.91033
3979.04	0.93664	3979.04	3979.04	3979.04	1.93631	2.92943	3.91188
3977.61	0.93779	3977.61	3977.61	3977.61	1.93757	2.93063	3.91341
3976.18	0.93892	3976.18	3976.18	3976.18	1.9388	2.93183	3.91492
3974.75	0.94003	3974.75	3974.75	3974.75	1.93996	2.93304	3.91644
3973.33	0.94114	3973.33	3973.33	3973.33	1.94107	2.93424	3.91796
3971.9	0.94222	3971.9	3971.9	3971.9	1.94216	2.93543	3.91949
3970.47	0.9433	3970.47	3970.47	3970.47	1.94327	2.93663	3.92105
3969.04	0.94437	3969.04	3969.04	3969.04	1.9444	2.93786	3.92265
3967.62	0.94551	3967.62	3967.62	3967.62	1.94557	2.93911	3.92427
3966.19	0.94671	3966.19	3966.19	3966.19	1.94676	2.94039	3.92593
3964.76	0.948	3964.76	3964.76	3964.76	1.94796	2.94167	3.92759
3963.33	0.94937	3963.33	3963.33	3963.33	1.94916	2.94295	3.92925
3961.9	0.9508	3961.9	3961.9	3961.9	1.95038	2.94422	3.9309
3960.48	0.95232	3960.48	3960.48	3960.48	1.95166	2.94549	3.93254
3959.05	0.95392	3959.05	3959.05	3959.05	1.953	2.94677	3.93415
3957.62	0.9556	3957.62	3957.62	3957.62	1.95437	2.94804	3.93574
3956.19	0.95734	3956.19	3956.19	3956.19	1.9557	2.9493	3.93732
3954.77	0.95911	3954.77	3954.77	3954.77	1.95695	2.95053	3.93888
3953.34	0.96087	3953.34	3953.34	3953.34	1.95813	2.95174	3.9404
3951.91	0.96256	3951.91	3951.91	3951.91	1.95931	2.95293	3.94189
3950.48	0.96415	3950.48	3950.48	3950.48	1.96051	2.9541	3.94336
3949.06	0.96561	3949.06	3949.06	3949.06	1.96173	2.95528	3.94485
3947.63	0.96694	3947.63	3947.63	3947.63	1.96293	2.95646	3.94636
3946.2	0.96815	3946.2	3946.2	3946.2	1.96407	2.95764	3.94791
3944.77	0.96926	3944.77	3944.77	3944.77	1.96511	2.95879	3.94947
3943.34	0.97026	3943.34	3943.34	3943.34	1.96608	2.95989	3.95099
3941.92	0.97116	3941.92	3941.92	3941.92	1.96703	2.96095	3.95245
3940.49	0.97196	3940.49	3940.49	3940.49	1.968	2.96199	3.95385
3939.06	0.97272	3939.06	3939.06	3939.06	1.96899	2.96303	3.95523
3937.63	0.9735	3937.63	3937.63	3937.63	1.96999	2.96407	3.95659
3936.21	0.97434	3936.21	3936.21	3936.21	1.97099	2.9651	3.95792
3934.78	0.97529	3934.78	3934.78	3934.78	1.97197	2.9661	3.95921
3933.35	0.97634	3933.35	3933.35	3933.35	1.97288	2.96706	3.96045
3931.92	0.97742	3931.92	3931.92	3931.92	1.97375	2.968	3.96165
3930.49	0.97851	3930.49	3930.49	3930.49	1.97461	2.96892	3.96279
3929.07	0.97958	3929.07	3929.07	3929.07	1.97551	2.96982	3.96389
3927.64	0.98056	3927.64	3927.64	3927.64	1.97647	2.97071	3.96494
3926.21	0.98137	3926.21	3926.21	3926.21	1.97742	2.97158	3.96597
3924.78	0.98194	3924.78	3924.78	3924.78	1.97829	2.97244	3.96701
3923.36	0.98224	3923.36	3923.36	3923.36	1.97901	2.97326	3.96807
3921.93	0.9823	3921.93	3921.93	3921.93	1.9796	2.97404	3.96914
3920.5	0.98218	3920.5	3920.5	3920.5	1.98009	2.97479	3.97023
3919.07	0.98198	3919.07	3919.07	3919.07	1.98054	2.97553	3.97134
3917.65	0.98184	3917.65	3917.65	3917.65	1.98091	2.97628	3.9725
3916.22	0.9819	3916.22	3916.22	3916.22	1.9812	2.97704	3.97366
3914.79	0.98227	3914.79	3914.79	3914.79	1.98149	2.97778	3.97473
3913.36	0.983	3913.36	3913.36	3913.36	1.98192	2.97851	3.97563
3911.93	0.98412	3911.93	3911.93	3911.93	1.98256	2.97921	3.97632
3910.51	0.98559	3910.51	3910.51	3910.51	1.98341	2.97988	3.97685
3909.08	0.98734	3909.08	3909.08	3909.08	1.98444	2.98054	3.97729
3907.65	0.98922	3907.65	3907.65	3907.65	1.98557	2.98119	3.97772
3906.22	0.99102	3906.22	3906.22	3906.22	1.98668	2.98183	3.97818
3904.8	0.99256	3904.8	3904.8	3904.8	1.98764	2.98247	3.97872
3903.37	0.99362	3903.37	3903.37	3903.37	1.98839	2.98311	3.97932
3901.94	0.9941	3901.94	3901.94	3901.94	1.98899	2.98374	3.98001
3900.51	0.99403	3900.51	3900.51	3900.51	1.98944	2.98438	3.98079
3899.09	0.99353	3899.09	3899.09	3899.09	1.98972	2.98501	3.98172
3897.66	0.99278	3897.66	3897.66	3897.66	1.98981	2.98565	3.98277
3896.23	0.99197	3896.23	3896.23	3896.23	1.98976	2.9863	3.98386
3894.8	0.99121	3894.8	3894.8	3894.8	1.98965	2.98691	3.98493
3893.37	0.99055	3893.37	3893.37	3893.37	1.98958	2.98749	3.98588
3891.95	0.98996	3891.95	3891.95	3891.95	1.98965	2.98803	3.98667
3890.52	0.98946	3890.52	3890.52	3890.52	1.99	2.98854	3.98725
3889.09	0.98916	3889.09	3889.09	3889.09	1.99059	2.98905	3.98772
3887.66	0.98909	3887.66	3887.66	3887.66	1.99128	2.98954	3.98817
3886.24	0.98919	3886.24	3886.24	3886.24	1.99187	2.99002	3.9887
3884.81	0.98936	3884.81	3884.81	3884.81	1.99225	2.99049	3.98934
3883.38	0.98958	3883.38	3883.38	3883.38	1.99241	2.99096	3.99004
3881.95	0.98986	3881.95	3881.95	3881.95	1.99245	2.99143	3.99073
3880.53	0.99017	3880.53	3880.53	3880.53	1.99257	2.99193	3.9913
3879.1	0.99056	3879.1	3879.1	3879.1	1.99288	2.99245	3.99178
3877.67	0.991	3877.67	3877.67	3877.67	1.99328	2.99297	3.99225
3876.24	0.99143	3876.24	3876.24	3876.24	1.9936	2.99348	3.99273
3874.81	0.99168	3874.81	3874.81	3874.81	1.99387	2.99397	3.99315
3873.39	0.9917	3873.39	3873.39	3873.39	1.99422	2.99444	3.99349
3871.96	0.99153	3871.96	3871.96	3871.96	1.99462	2.99485	3.99378
3870.53	0.99119	3870.53	3870.53	3870.53	1.99496	2.9952	3.9941
3869.1	0.99077	3869.1	3869.1	3869.1	1.99513	2.99549	3.99447
3867.68	0.99042	3867.68	3867.68	3867.68	1.99505	2.99574	3.99492
3866.25	0.99024	3866.25	3866.25	3866.25	1.99468	2.99597	3.99544
3864.82	0.99022	3864.82	3864.82	3864.82	1.99426	2.99624	3.99589
3863.39	0.9903	3863.39	3863.39	3863.39	1.99418	2.99659	3.99616
3861.96	0.99046	3861.96	3861.96	3861.96	1.9946	2.99699	3.99626
3860.54	0.99072	3860.54	3860.54	3860.54	1.99531	2.9974	3.99632
3859.11	0.99106	3859.11	3859.11	3859.11	1.99606	2.99778	3.99639
3857.68	0.99144	3857.68	3857.68	3857.68	1.99667	2.99812	3.99654
3856.25	0.9917	3856.25	3856.25	3856.25	1.997	2.99841	3.9968
3854.83	0.99162	3854.83	3854.83	3854.83	1.997	2.99864	3.99716
3853.4	0.991	3853.4	3853.4	3853.4	1.99672	2.99881	3.99755
3851.97	0.98989	3851.97	3851.97	3851.97	1.99632	2.99891	3.9979
3850.54	0.98866	3850.54	3850.54	3850.54	1.99588	2.99896	3.9982
3849.12	0.98769	3849.12	3849.12	3849.12	1.99546	2.99898	3.99845
3847.69	0.98718	3847.69	3847.69	3847.69	1.99508	2.99897	3.99869
3846.26	0.98722	3846.26	3846.26	3846.26	1.99473	2.99894	3.99892
3844.83	0.98774	3844.83	3844.83	3844.83	1.99444	2.9989	3.99911
3843.4	0.98854	3843.4	3843.4	3843.4	1.99438	2.99891	3.99915
3841.98	0.98941	3841.98	3841.98	3841.98	1.99487	2.99902	3.99898
3840.55	0.99019	3840.55	3840.55	3840.55	1.9959	2.99919	3.9987
3839.12	0.99075	3839.12	3839.12	3839.12	1.99708	2.99936	3.9985
3837.69	0.99103	3837.69	3837.69	3837.69	1.99797	2.99949	3.99849
3836.27	0.99105	3836.27	3836.27	3836.27	1.99837	2.99956	3.99868
3834.84	0.99091	3834.84	3834.84	3834.84	1.99823	2.9996	3.99903
3833.41	0.99071	3833.41	3833.41	3833.41	1.99766	2.99961	3.99945
3831.98	0.99047	3831.98	3831.98	3831.98	1.99695	2.99963	3.99979
3830.56	0.9903	3830.56	3830.56	3830.56	1.99636	2.99966	3.99997
3829.13	0.99035	3829.13	3829.13	3829.13	1.99595	2.99967	4
3827.7	0.99079	3827.7	3827.7	3827.7	1.99577	2.9997	3.99987
3826.27	0.99161	3826.27	3826.27	3826.27	1.99593	2.99978	3.9996
3824.84	0.99268	3824.84	3824.84	3824.84	1.99646	2.99989	3.99928
3823.42	0.99372	3823.42	3823.42	3823.42	1.99712	2.99998	3.999
3821.99	0.99446	3821.99	3821.99	3821.99	1.99763	3	3.99882
3820.56	0.99472	3820.56	3820.56	3820.56	1.99783	2.99996	3.99874
3819.13	0.99448	3819.13	3819.13	3819.13	1.99773	2.99987	3.99872
3817.71	0.99382	3817.71	3817.71	3817.71	1.99745	2.99976	3.99874
3816.28	0.99284	3816.28	3816.28	3816.28	1.99707	2.99962	3.99882
3814.85	0.99176	3814.85	3814.85	3814.85	1.99658	2.99946	3.99894
3813.42	0.99088	3813.42	3813.42	3813.42	1.99596	2.99929	3.99904
3811.99	0.99049	3811.99	3811.99	3811.99	1.99534	2.99911	3.99904
3810.57	0.99067	3810.57	3810.57	3810.57	1.99492	2.99894	3.99885
3809.14	0.9913	3809.14	3809.14	3809.14	1.99482	2.99879	3.99849
3807.71	0.99216	3807.71	3807.71	3807.71	1.99494	2.99863	3.998
3806.28	0.99301	3806.28	3806.28	3806.28	1.99515	2.99845	3.99745
3804.86	0.9937	3804.86	3804.86	3804.86	1.99539	2.9983	3.99688
3803.43	0.99403	3803.43	3803.43	3803.43	1.99564	2.99818	3.99635
3802	0.99387	3802	3802	3802	1.99573	2.99805	3.99594
3800.57	0.99308	3800.57	3800.57	3800.57	1.99561	2.99787	3.99566
3799.15	0.99159	3799.15	3799.15	3799.15	1.99521	2.99763	3.99549
3797.72	0.98961	3797.72	3797.72	3797.72	1.99448	2.99737	3.99537
3796.29	0.98736	3796.29	3796.29	3796.29	1.99367	2.99712	3.99526
3794.86	0.98504	3794.86	3794.86	3794.86	1.99298	2.9969	3.99517
3793.43	0.98286	3793.43	3793.43	3793.43	1.9924	2.9967	3.99509
3792.01	0.981	3792.01	3792.01	3792.01	1.99187	2.9965	3.99501
3790.58	0.97962	3790.58	3790.58	3790.58	1.99147	2.99632	3.99482
3789.15	0.97878	3789.15	3789.15	3789.15	1.99131	2.99614	3.99447
3787.72	0.97841	3787.72	3787.72	3787.72	1.99137	2.99595	3.99402
3786.3	0.9784	3786.3	3786.3	3786.3	1.99147	2.99575	3.99356
3784.87	0.97863	3784.87	3784.87	3784.87	1.99151	2.99553	3.99309
3783.44	0.97902	3783.44	3783.44	3783.44	1.99148	2.99533	3.99267
3782.01	0.97946	3782.01	3782.01	3782.01	1.99138	2.99515	3.99229
3780.59	0.97984	3780.59	3780.59	3780.59	1.99124	2.99497	3.99193
3779.16	0.98007	3779.16	3779.16	3779.16	1.99114	2.9948	3.99155
3777.73	0.98021	3777.73	3777.73	3777.73	1.99111	2.99463	3.99115
3776.3	0.98039	3776.3	3776.3	3776.3	1.99117	2.99445	3.99074
3774.87	0.98063	3774.87	3774.87	3774.87	1.99132	2.99429	3.99034
3773.45	0.98086	3773.45	3773.45	3773.45	1.99152	2.99415	3.98999
3772.02	0.98097	3772.02	3772.02	3772.02	1.99171	2.994	3.98968
3770.59	0.98098	3770.59	3770.59	3770.59	1.99187	2.99385	3.98938
3769.16	0.98092	3769.16	3769.16	3769.16	1.99206	2.99366	3.98897
3767.74	0.98086	3767.74	3767.74	3767.74	1.99228	2.99344	3.9885
3766.31	0.98085	3766.31	3766.31	3766.31	1.99245	2.9932	3.98803
3764.88	0.98102	3764.88	3764.88	3764.88	1.9924	2.99295	3.98768
3763.45	0.98153	3763.45	3763.45	3763.45	1.99211	2.99273	3.98745
3762.02	0.98256	3762.02	3762.02	3762.02	1.99179	2.99262	3.98729
3760.6	0.98412	3760.6	3760.6	3760.6	1.99172	2.99266	3.98716
3759.17	0.98609	3759.17	3759.17	3759.17	1.99203	2.99283	3.98708
3757.74	0.98834	3757.74	3757.74	3757.74	1.99286	2.9931	3.98706
3756.31	0.99076	3756.31	3756.31	3756.31	1.99385	2.99345	3.98707
3754.89	0.99323	3754.89	3754.89	3754.89	1.99508	2.99388	3.98707
3753.46	0.99557	3753.46	3753.46	3753.46	1.99657	2.99439	3.9871
3752.03	0.99755	3752.03	3752.03	3752.03	1.99807	2.9949	3.98727
3750.6	0.99897	3750.6	3750.6	3750.6	1.99923	2.99535	3.98764
3749.18	0.99977	3749.18	3749.18	3749.18	1.99986	2.99568	3.98814
3747.75	1	3747.75	3747.75	3747.75	2	2.99586	3.98865
3746.32	0.99991	3746.32	3746.32	3746.32	1.99984	2.99584	3.98902
3744.89	0.99934	3744.89	3744.89	3744.89	1.99951	2.99569	3.98927
3743.46	0.99832	3743.46	3743.46	3743.46	1.99907	2.99544	3.98944
3742.04	0.99713	3742.04	3742.04	3742.04	1.99855	2.99518	3.9896
3740.61	0.99609	3740.61	3740.61	3740.61	1.99803	2.99496	3.98978
3739.18	0.99535	3739.18	3739.18	3739.18	1.99758	2.99479	3.98999
3737.75	0.99483	3737.75	3737.75	3737.75	1.99718	2.99466	3.99021
3736.33	0.99436	3736.33	3736.33	3736.33	1.9967	2.99452	3.99047
3734.9	0.99377	3734.9	3734.9	3734.9	1.99615	2.99438	3.99069
3733.47	0.99293	3733.47	3733.47	3733.47	1.99572	2.99428	3.99083
3732.04	0.99184	3732.04	3732.04	3732.04	1.9956	2.99425	3.99094
3730.62	0.99063	3730.62	3730.62	3730.62	1.99571	2.99428	3.99113
3729.19	0.98948	3729.19	3729.19	3729.19	1.9957	2.99432	3.9915
3727.76	0.98857	3727.76	3727.76	3727.76	1.99536	2.99435	3.99205
3726.33	0.98803	3726.33	3726.33	3726.33	1.99471	2.99436	3.99268
3724.9	0.98784	3724.9	3724.9	3724.9	1.99397	2.99439	3.99327
3723.48	0.98794	3723.48	3723.48	3723.48	1.99345	2.99444	3.99367
3722.05	0.9883	3722.05	3722.05	3722.05	1.99346	2.99454	3.99383
3720.62	0.98899	3720.62	3720.62	3720.62	1.994	2.9947	3.99381
3719.19	0.99008	3719.19	3719.19	3719.19	1.99486	2.99491	3.99374
3717.77	0.99162	3717.77	3717.77	3717.77	1.99567	2.99509	3.99368
3716.34	0.99343	3716.34	3716.34	3716.34	1.99617	2.99518	3.99361
3714.91	0.99521	3714.91	3714.91	3714.91	1.99632	2.99517	3.99349
3713.48	0.9966	3713.48	3713.48	3713.48	1.99625	2.99508	3.99326
3712.05	0.99725	3712.05	3712.05	3712.05	1.99615	2.99495	3.99293
3710.63	0.99706	3710.63	3710.63	3710.63	1.99614	2.99478	3.99254
3709.2	0.99635	3709.2	3709.2	3709.2	1.99615	2.99461	3.99216
3707.77	0.99533	3707.77	3707.77	3707.77	1.99608	2.99442	3.99181
3706.34	0.99434	3706.34	3706.34	3706.34	1.99586	2.99422	3.99153
3704.92	0.99357	3704.92	3704.92	3704.92	1.99534	2.99402	3.99136
3703.49	0.99307	3703.49	3703.49	3703.49	1.99454	2.99384	3.99128
3702.06	0.99281	3702.06	3702.06	3702.06	1.99369	2.99368	3.99121
3700.63	0.99277	3700.63	3700.63	3700.63	1.99313	2.99357	3.99102
3699.21	0.99293	3699.21	3699.21	3699.21	1.99313	2.99349	3.99064
3697.78	0.99327	3697.78	3697.78	3697.78	1.9936	2.99341	3.99012
3696.35	0.99373	3696.35	3696.35	3696.35	1.9942	2.99328	3.98959
3694.92	0.99432	3694.92	3694.92	3694.92	1.9946	2.99309	3.98915
3693.49	0.99491	3693.49	3693.49	3693.49	1.99462	2.99285	3.9888
3692.07	0.99525	3692.07	3692.07	3692.07	1.9944	2.99259	3.98855
3690.64	0.99512	3690.64	3690.64	3690.64	1.99401	2.99231	3.98835
3689.21	0.99446	3689.21	3689.21	3689.21	1.99357	2.99201	3.98818
3687.78	0.99349	3687.78	3687.78	3687.78	1.99314	2.99169	3.98799
3686.36	0.99261	3686.36	3686.36	3686.36	1.99284	2.99135	3.9877
3684.93	0.99204	3684.93	3684.93	3684.93	1.99269	2.99095	3.98722
3683.5	0.99198	3683.5	3683.5	3683.5	1.99259	2.99044	3.98659
3682.07	0.99239	3682.07	3682.07	3682.07	1.99242	2.98985	3.98588
3680.65	0.99307	3680.65	3680.65	3680.65	1.99231	2.9892	3.98506
3679.22	0.99378	3679.22	3679.22	3679.22	1.99243	2.9885	3.98405
3677.79	0.99418	3677.79	3677.79	3677.79	1.99278	2.9877	3.98286
3676.36	0.99403	3676.36	3676.36	3676.36	1.99312	2.98677	3.98157
3674.93	0.9939	3674.93	3674.93	3674.93	1.99316	2.98568	3.98032
3673.51	0.99316	3673.51	3673.51	3673.51	1.99303	2.98447	3.97917
3672.08	0.99152	3672.08	3672.08	3672.08	1.99288	2.98312	3.97813
3670.65	0.98888	3670.65	3670.65	3670.65	1.99235	2.98164	3.97718
3669.22	0.98534	3669.22	3669.22	3669.22	1.99128	2.98	3.97627
3667.8	0.98122	3667.8	3667.8	3667.8	1.98989	2.97826	3.97534
3666.37	0.97709	3666.37	3666.37	3666.37	1.98845	2.97643	3.97427
3664.94	0.97348	3664.94	3664.94	3664.94	1.98719	2.97454	3.97297
3663.51	0.97079	3663.51	3663.51	3663.51	1.98621	2.97258	3.97139
3662.08	0.96919	3662.08	3662.08	3662.08	1.98545	2.97052	3.96955
3660.66	0.96874	3660.66	3660.66	3660.66	1.98496	2.9684	3.96743
3659.23	0.96933	3659.23	3659.23	3659.23	1.985	2.96625	3.96492
3657.8	0.97065	3657.8	3657.8	3657.8	1.98571	2.96409	3.96197
3656.37	0.97229	3656.37	3656.37	3656.37	1.98681	2.96186	3.95868
3654.95	0.97385	3654.95	3654.95	3654.95	1.98786	2.95952	3.95525
3653.52	0.97498	3653.52	3653.52	3653.52	1.98849	2.95708	3.95183
3652.09	0.97528	3652.09	3652.09	3652.09	1.98858	2.95454	3.94848
3650.66	0.97436	3650.66	3650.66	3650.66	1.98814	2.9519	3.9452
3649.24	0.97197	3649.24	3649.24	3649.24	1.98715	2.94913	3.94197
3647.81	0.96818	3647.81	3647.81	3647.81	1.98562	2.94621	3.93877
3646.38	0.9634	3646.38	3646.38	3646.38	1.98362	2.94316	3.93558
3644.95	0.9582	3644.95	3644.95	3644.95	1.98129	2.93998	3.93234
3643.52	0.95305	3643.52	3643.52	3643.52	1.97868	2.93667	3.92904
3642.1	0.94823	3642.1	3642.1	3642.1	1.97578	2.93323	3.92566
3640.67	0.94388	3640.67	3640.67	3640.67	1.97282	2.92972	3.92216
3639.24	0.94008	3639.24	3639.24	3639.24	1.97023	2.92616	3.91832
3637.81	0.93689	3637.81	3637.81	3637.81	1.96832	2.9225	3.91397
3636.39	0.93428	3636.39	3636.39	3636.39	1.96697	2.9187	3.9091
3634.96	0.93212	3634.96	3634.96	3634.96	1.96574	2.91473	3.90392
3633.53	0.93023	3633.53	3633.53	3633.53	1.96421	2.91061	3.89865
3632.1	0.92837	3632.1	3632.1	3632.1	1.96223	2.90636	3.89341
3630.68	0.92623	3630.68	3630.68	3630.68	1.95988	2.90204	3.88821
3629.25	0.92348	3629.25	3629.25	3629.25	1.95736	2.89767	3.88299
3627.82	0.91997	3627.82	3627.82	3627.82	1.95476	2.89326	3.87772
3626.39	0.9159	3626.39	3626.39	3626.39	1.95201	2.88879	3.87242
3624.96	0.91166	3624.96	3624.96	3624.96	1.94907	2.8843	3.86715
3623.54	0.9075	3623.54	3623.54	3623.54	1.94594	2.87978	3.86191
3622.11	0.90353	3622.11	3622.11	3622.11	1.94269	2.87526	3.85668
3620.68	0.89968	3620.68	3620.68	3620.68	1.93939	2.87073	3.85144
3619.25	0.89581	3619.25	3619.25	3619.25	1.93622	2.86622	3.84615
3617.83	0.89183	3617.83	3617.83	3617.83	1.93336	2.86172	3.8407
3616.4	0.88773	3616.4	3616.4	3616.4	1.93076	2.85714	3.83501
3614.97	0.8835	3614.97	3614.97	3614.97	1.9281	2.8524	3.82914
3613.54	0.8791	3613.54	3613.54	3613.54	1.92501	2.84751	3.82326
3612.11	0.87445	3612.11	3612.11	3612.11	1.92141	2.84248	3.81746
3610.69	0.86943	3610.69	3610.69	3610.69	1.91738	2.83736	3.81172
3609.26	0.86397	3609.26	3609.26	3609.26	1.91307	2.83217	3.80597
3607.83	0.85806	3607.83	3607.83	3607.83	1.90867	2.82691	3.80015
3606.4	0.85191	3606.4	3606.4	3606.4	1.90427	2.8216	3.79422
3604.98	0.84582	3604.98	3604.98	3604.98	1.89988	2.81624	3.78821
3603.55	0.84009	3603.55	3603.55	3603.55	1.89543	2.81086	3.78214
3602.12	0.83484	3602.12	3602.12	3602.12	1.89093	2.80546	3.77605
3600.69	0.83003	3600.69	3600.69	3600.69	1.88644	2.80009	3.76995
3599.27	0.82555	3599.27	3599.27	3599.27	1.88212	2.79477	3.76382
3597.84	0.82127	3597.84	3597.84	3597.84	1.87807	2.78948	3.75759
3596.41	0.81711	3596.41	3596.41	3596.41	1.87428	2.78415	3.75119
3594.98	0.81299	3594.98	3594.98	3594.98	1.87053	2.77871	3.74463
3593.55	0.80887	3593.55	3593.55	3593.55	1.86665	2.77317	3.738
3592.13	0.8047	3592.13	3592.13	3592.13	1.86254	2.76759	3.7314
3590.7	0.80037	3590.7	3590.7	3590.7	1.85824	2.762	3.72488
3589.27	0.7957	3589.27	3589.27	3589.27	1.85383	2.75643	3.71843
3587.84	0.7906	3587.84	3587.84	3587.84	1.84932	2.75088	3.71203
3586.42	0.78512	3586.42	3586.42	3586.42	1.84474	2.74537	3.70567
3584.99	0.7795	3584.99	3584.99	3584.99	1.8401	2.73989	3.69937
3583.56	0.77403	3583.56	3583.56	3583.56	1.83539	2.73445	3.69312
3582.13	0.76891	3582.13	3582.13	3582.13	1.8306	2.72903	3.68691
3580.71	0.76422	3580.71	3580.71	3580.71	1.82568	2.72362	3.68075
3579.28	0.75997	3579.28	3579.28	3579.28	1.82074	2.71825	3.67464
3577.85	0.75613	3577.85	3577.85	3577.85	1.81604	2.71293	3.66851
3576.42	0.75267	3576.42	3576.42	3576.42	1.8118	2.70766	3.66226
3574.99	0.74954	3574.99	3574.99	3574.99	1.80797	2.70237	3.65583
3573.57	0.74669	3573.57	3573.57	3573.57	1.80436	2.69703	3.64927
3572.14	0.74404	3572.14	3572.14	3572.14	1.80075	2.69167	3.64271
3570.71	0.74152	3570.71	3570.71	3570.71	1.79709	2.68632	3.63624
3569.28	0.73893	3569.28	3569.28	3569.28	1.79341	2.68104	3.62991
3567.86	0.73609	3567.86	3567.86	3567.86	1.78976	2.67586	3.62374
3566.43	0.73286	3566.43	3566.43	3566.43	1.78614	2.67078	3.61772
3565	0.72927	3565	3565	3565	1.7825	2.66583	3.61187
3563.57	0.72549	3563.57	3563.57	3563.57	1.77883	2.661	3.60619
3562.14	0.72171	3562.14	3562.14	3562.14	1.77509	2.65628	3.60067
3560.72	0.71807	3560.72	3560.72	3560.72	1.77126	2.65166	3.59531
3559.29	0.71461	3559.29	3559.29	3559.29	1.76738	2.64715	3.59011
3557.86	0.71135	3557.86	3557.86	3557.86	1.76355	2.64275	3.58504
3556.43	0.70831	3556.43	3556.43	3556.43	1.75994	2.63845	3.58003
3555.01	0.70549	3555.01	3555.01	3555.01	1.75665	2.63421	3.57503
3553.58	0.7029	3553.58	3553.58	3553.58	1.75366	2.63004	3.57004
3552.15	0.7005	3552.15	3552.15	3552.15	1.75088	2.62594	3.56512
3550.72	0.69828	3550.72	3550.72	3550.72	1.74825	2.62195	3.56036
3549.3	0.69621	3549.3	3549.3	3549.3	1.74574	2.61809	3.55578
3547.87	0.69423	3547.87	3547.87	3547.87	1.74338	2.61438	3.55138
3546.44	0.6923	3546.44	3546.44	3546.44	1.74118	2.61081	3.54716
3545.01	0.69042	3545.01	3545.01	3545.01	1.73912	2.6074	3.5431
3543.58	0.68868	3543.58	3543.58	3543.58	1.73718	2.60415	3.53921
3542.16	0.68715	3542.16	3542.16	3542.16	1.73537	2.60107	3.53549
3540.73	0.6859	3540.73	3540.73	3540.73	1.73366	2.59816	3.53193
3539.3	0.68494	3539.3	3539.3	3539.3	1.73207	2.59541	3.52851
3537.87	0.68423	3537.87	3537.87	3537.87	1.73061	2.59282	3.52523
3536.45	0.68375	3536.45	3536.45	3536.45	1.72928	2.59037	3.52206
3535.02	0.68347	3535.02	3535.02	3535.02	1.72803	2.58802	3.51898
3533.59	0.68335	3533.59	3533.59	3533.59	1.7268	2.58569	3.51596
3532.16	0.68331	3532.16	3532.16	3532.16	1.7256	2.58339	3.51301
3530.74	0.68328	3530.74	3530.74	3530.74	1.72445	2.58115	3.51015
3529.31	0.68317	3529.31	3529.31	3529.31	1.72341	2.579	3.50742
3527.88	0.68296	3527.88	3527.88	3527.88	1.72251	2.57698	3.50482
3526.45	0.68263	3526.45	3526.45	3526.45	1.72174	2.57507	3.50235
3525.02	0.6822	3525.02	3525.02	3525.02	1.72106	2.57325	3.5
3523.6	0.68175	3523.6	3523.6	3523.6	1.72044	2.57148	3.49774
3522.17	0.68135	3522.17	3522.17	3522.17	1.71987	2.56978	3.49557
3520.74	0.68101	3520.74	3520.74	3520.74	1.71938	2.56814	3.49349
3519.31	0.68077	3519.31	3519.31	3519.31	1.71899	2.56659	3.4915
3517.89	0.68062	3517.89	3517.89	3517.89	1.71869	2.56513	3.48961
3516.46	0.68055	3516.46	3516.46	3516.46	1.71847	2.56375	3.48779
3515.03	0.68058	3515.03	3515.03	3515.03	1.71829	2.56245	3.48603
3513.6	0.68071	3513.6	3513.6	3513.6	1.71808	2.56117	3.48429
3512.17	0.68091	3512.17	3512.17	3512.17	1.71778	2.55988	3.48256
3510.75	0.68115	3510.75	3510.75	3510.75	1.71741	2.55859	3.48084
3509.32	0.68136	3509.32	3509.32	3509.32	1.71702	2.55733	3.47916
3507.89	0.68151	3507.89	3507.89	3507.89	1.71665	2.55611	3.47752
3506.46	0.68158	3506.46	3506.46	3506.46	1.71632	2.55494	3.47594
3505.04	0.68158	3505.04	3505.04	3505.04	1.71605	2.55381	3.47439
3503.61	0.68154	3503.61	3503.61	3503.61	1.71584	2.55272	3.4729
3502.18	0.68152	3502.18	3502.18	3502.18	1.71567	2.55166	3.47145
3500.75	0.68157	3500.75	3500.75	3500.75	1.71556	2.55064	3.47004
3499.33	0.68173	3499.33	3499.33	3499.33	1.71554	2.54966	3.46868
3497.9	0.68201	3497.9	3497.9	3497.9	1.71562	2.54872	3.46733
3496.47	0.68238	3496.47	3496.47	3496.47	1.71575	2.54783	3.46601
3495.04	0.68283	3495.04	3495.04	3495.04	1.71591	2.54699	3.46472
3493.61	0.68334	3493.61	3493.61	3493.61	1.7161	2.54621	3.46345
3492.19	0.68393	3492.19	3492.19	3492.19	1.71629	2.54546	3.4622
3490.76	0.68458	3490.76	3490.76	3490.76	1.71643	2.54469	3.46092
3489.33	0.6853	3489.33	3489.33	3489.33	1.71647	2.54388	3.4596
3487.9	0.68604	3487.9	3487.9	3487.9	1.71644	2.54303	3.45828
3486.48	0.68677	3486.48	3486.48	3486.48	1.71639	2.54217	3.45697
3485.05	0.68744	3485.05	3485.05	3485.05	1.71637	2.54133	3.45567
3483.62	0.68799	3483.62	3483.62	3483.62	1.71645	2.54051	3.45441
3482.19	0.68841	3482.19	3482.19	3482.19	1.71662	2.53973	3.45317
3480.77	0.6887	3480.77	3480.77	3480.77	1.71684	2.53897	3.45194
3479.34	0.68891	3479.34	3479.34	3479.34	1.71698	2.53818	3.45068
3477.91	0.68905	3477.91	3477.91	3477.91	1.71698	2.53732	3.44938
3476.48	0.68913	3476.48	3476.48	3476.48	1.71684	2.53639	3.44802
3475.05	0.68914	3475.05	3475.05	3475.05	1.7166	2.53544	3.44662
3473.63	0.68906	3473.63	3473.63	3473.63	1.71638	2.53451	3.44522
3472.2	0.68895	3472.2	3472.2	3472.2	1.71624	2.53363	3.44385
3470.77	0.68887	3470.77	3470.77	3470.77	1.71617	2.53279	3.44249
3469.34	0.68891	3469.34	3469.34	3469.34	1.71612	2.53195	3.44115
3467.92	0.68914	3467.92	3467.92	3467.92	1.71603	2.5311	3.4398
3466.49	0.68961	3466.49	3466.49	3466.49	1.71594	2.53025	3.43846
3465.06	0.69028	3465.06	3465.06	3465.06	1.71591	2.52943	3.43717
3463.63	0.69109	3463.63	3463.63	3463.63	1.71602	2.52869	3.43593
3462.2	0.69198	3462.2	3462.2	3462.2	1.71629	2.52803	3.43476
3460.78	0.6929	3460.78	3460.78	3460.78	1.71665	2.52744	3.43365
3459.35	0.69385	3459.35	3459.35	3459.35	1.71704	2.52689	3.43257
3457.92	0.69484	3457.92	3457.92	3457.92	1.71735	2.5263	3.43146
3456.49	0.69586	3456.49	3456.49	3456.49	1.71751	2.52564	3.43031
3455.07	0.69683	3455.07	3455.07	3455.07	1.71754	2.52491	3.42912
3453.64	0.6977	3453.64	3453.64	3453.64	1.71754	2.52416	3.42792
3452.21	0.69841	3452.21	3452.21	3452.21	1.7176	2.52345	3.42677
3450.78	0.69894	3450.78	3450.78	3450.78	1.71776	2.52279	3.42566
3449.36	0.69929	3449.36	3449.36	3449.36	1.71795	2.52217	3.4246
3447.93	0.69951	3447.93	3447.93	3447.93	1.71806	2.52153	3.42354
3446.5	0.69959	3446.5	3446.5	3446.5	1.71799	2.52087	3.42249
3445.07	0.69956	3445.07	3445.07	3445.07	1.71775	2.52017	3.42144
3443.64	0.69945	3443.64	3443.64	3443.64	1.71742	2.51948	3.42042
3442.22	0.69926	3442.22	3442.22	3442.22	1.71708	2.51883	3.41945
3440.79	0.69903	3440.79	3440.79	3440.79	1.71676	2.51825	3.41853
3439.36	0.69885	3439.36	3439.36	3439.36	1.71649	2.51773	3.41769
3437.93	0.69882	3437.93	3437.93	3437.93	1.71631	2.51728	3.41692
3436.51	0.69906	3436.51	3436.51	3436.51	1.71626	2.5169	3.41624
3435.08	0.69964	3435.08	3435.08	3435.08	1.71637	2.51662	3.41564
3433.65	0.70058	3433.65	3433.65	3433.65	1.71669	2.51646	3.41514
3432.22	0.70185	3432.22	3432.22	3432.22	1.71725	2.51643	3.41475
3430.8	0.70339	3430.8	3430.8	3430.8	1.71804	2.51653	3.41448
3429.37	0.70516	3429.37	3429.37	3429.37	1.71906	2.51677	3.41433
3427.94	0.70708	3427.94	3427.94	3427.94	1.72025	2.51712	3.41429
3426.51	0.70907	3426.51	3426.51	3426.51	1.7215	2.51757	3.41431
3425.08	0.71105	3425.08	3425.08	3425.08	1.72269	2.51804	3.41439
3423.66	0.71297	3423.66	3423.66	3423.66	1.72374	2.51851	3.41449
3422.23	0.71479	3422.23	3422.23	3422.23	1.72467	2.51898	3.41462
3420.8	0.7165	3420.8	3420.8	3420.8	1.72553	2.51947	3.4148
3419.37	0.71809	3419.37	3419.37	3419.37	1.72635	2.52	3.41503
3417.95	0.71953	3417.95	3417.95	3417.95	1.72716	2.52055	3.41531
3416.52	0.72085	3416.52	3416.52	3416.52	1.72797	2.52114	3.41564
3415.09	0.72208	3415.09	3415.09	3415.09	1.72884	2.52179	3.41605
3413.66	0.72329	3413.66	3413.66	3413.66	1.72977	2.52253	3.41653
3412.24	0.72451	3412.24	3412.24	3412.24	1.73069	2.5233	3.41709
3410.81	0.72576	3410.81	3410.81	3410.81	1.73156	2.52408	3.41769
3409.38	0.72703	3409.38	3409.38	3409.38	1.73238	2.52483	3.41833
3407.95	0.72829	3407.95	3407.95	3407.95	1.73323	2.52561	3.41903
3406.52	0.72954	3406.52	3406.52	3406.52	1.7342	2.52646	3.4198
3405.1	0.73079	3405.1	3405.1	3405.1	1.73531	2.52741	3.42064
3403.67	0.73206	3403.67	3403.67	3403.67	1.73648	2.52842	3.42155
3402.24	0.7334	3402.24	3402.24	3402.24	1.73762	2.52944	3.4225
3400.81	0.73491	3400.81	3400.81	3400.81	1.73868	2.53046	3.42348
3399.39	0.73663	3399.39	3399.39	3399.39	1.73973	2.53149	3.4245
3397.96	0.73855	3397.96	3397.96	3397.96	1.74084	2.53259	3.42557
3396.53	0.74063	3396.53	3396.53	3396.53	1.74206	2.53379	3.42672
3395.1	0.74283	3395.1	3395.1	3395.1	1.74341	2.53511	3.42795
3393.67	0.74514	3393.67	3393.67	3393.67	1.7449	2.53655	3.42927
3392.25	0.74759	3392.25	3392.25	3392.25	1.74647	2.5381	3.43066
3390.82	0.75023	3390.82	3390.82	3390.82	1.74804	2.5397	3.43211
3389.39	0.753	3389.39	3389.39	3389.39	1.74953	2.54129	3.4336
3387.96	0.75584	3387.96	3387.96	3387.96	1.75097	2.54286	3.43511
3386.54	0.75863	3386.54	3386.54	3386.54	1.75244	2.54443	3.43666
3385.11	0.76128	3385.11	3385.11	3385.11	1.75402	2.54606	3.43827
3383.68	0.76374	3383.68	3383.68	3383.68	1.75572	2.54776	3.43993
3382.25	0.76599	3382.25	3382.25	3382.25	1.75745	2.5495	3.44163
3380.83	0.76806	3380.83	3380.83	3380.83	1.75908	2.55122	3.44336
3379.4	0.76998	3379.4	3379.4	3379.4	1.76053	2.55287	3.4451
3377.97	0.77179	3377.97	3377.97	3377.97	1.76181	2.55446	3.44687
3376.54	0.7735	3376.54	3376.54	3376.54	1.76301	2.55604	3.44868
3375.11	0.77513	3375.11	3375.11	3375.11	1.76419	2.55767	3.45055
3373.69	0.77675	3373.69	3373.69	3373.69	1.7654	2.55935	3.45246
3372.26	0.77844	3372.26	3372.26	3372.26	1.76663	2.56109	3.45443
3370.83	0.78031	3370.83	3370.83	3370.83	1.7679	2.56288	3.45643
3369.4	0.78244	3369.4	3369.4	3369.4	1.76922	2.56471	3.45847
3367.98	0.78487	3367.98	3367.98	3367.98	1.77062	2.5666	3.46054
3366.55	0.78756	3366.55	3366.55	3366.55	1.77217	2.56854	3.46264
3365.12	0.79043	3365.12	3365.12	3365.12	1.77386	2.57055	3.46475
3363.69	0.79339	3363.69	3363.69	3363.69	1.7757	2.57263	3.46689
3362.27	0.79637	3362.27	3362.27	3362.27	1.77761	2.57475	3.46905
3360.84	0.79932	3360.84	3360.84	3360.84	1.77953	2.5769	3.47126
3359.41	0.80219	3359.41	3359.41	3359.41	1.78139	2.57904	3.47351
3357.98	0.80492	3357.98	3357.98	3357.98	1.78318	2.58118	3.47581
3356.55	0.80747	3356.55	3356.55	3356.55	1.7849	2.58332	3.47815
3355.13	0.80981	3355.13	3355.13	3355.13	1.78653	2.58545	3.48052
3353.7	0.81194	3353.7	3353.7	3353.7	1.78808	2.58758	3.48292
3352.27	0.8139	3352.27	3352.27	3352.27	1.78954	2.58971	3.48535
3350.84	0.81577	3350.84	3350.84	3350.84	1.79091	2.59183	3.4878
3349.42	0.81761	3349.42	3349.42	3349.42	1.7922	2.59391	3.49028
3347.99	0.81947	3347.99	3347.99	3347.99	1.79346	2.59597	3.4928
3346.56	0.82138	3346.56	3346.56	3346.56	1.79473	2.59802	3.49535
3345.13	0.82334	3345.13	3345.13	3345.13	1.79611	2.60011	3.49791
3343.7	0.82535	3343.7	3343.7	3343.7	1.7976	2.60226	3.50046
3342.28	0.82744	3342.28	3342.28	3342.28	1.7992	2.60445	3.50301
3340.85	0.82957	3340.85	3340.85	3340.85	1.80084	2.60667	3.50556
3339.42	0.83175	3339.42	3339.42	3339.42	1.80248	2.6089	3.50814
3337.99	0.83397	3337.99	3337.99	3337.99	1.80413	2.61114	3.51075
3336.57	0.83618	3336.57	3336.57	3336.57	1.80584	2.61341	3.5134
3335.14	0.83834	3335.14	3335.14	3335.14	1.80759	2.6157	3.51609
3333.71	0.8404	3333.71	3333.71	3333.71	1.80936	2.61801	3.51879
3332.28	0.84236	3332.28	3332.28	3332.28	1.81106	2.62032	3.52149
3330.86	0.84424	3330.86	3330.86	3330.86	1.81264	2.62263	3.52419
3329.43	0.84608	3329.43	3329.43	3329.43	1.81409	2.62492	3.5269
3328	0.8479	3328	3328	3328	1.81546	2.62721	3.52964
3326.57	0.84972	3326.57	3326.57	3326.57	1.81681	2.62948	3.53242
3325.14	0.85154	3325.14	3325.14	3325.14	1.81819	2.63177	3.53523
3323.72	0.85332	3323.72	3323.72	3323.72	1.81967	2.63411	3.53806
3322.29	0.85503	3322.29	3322.29	3322.29	1.82126	2.6365	3.54089
3320.86	0.85663	3320.86	3320.86	3320.86	1.8229	2.6389	3.54372
3319.43	0.85812	3319.43	3319.43	3319.43	1.82454	2.64129	3.54654
3318.01	0.85946	3318.01	3318.01	3318.01	1.82613	2.64364	3.54938
3316.58	0.86066	3316.58	3316.58	3316.58	1.82767	2.64593	3.55226
3315.15	0.86172	3315.15	3315.15	3315.15	1.82915	2.64817	3.5552
3313.72	0.86265	3313.72	3313.72	3313.72	1.83058	2.65035	3.5582
3312.3	0.86349	3312.3	3312.3	3312.3	1.83197	2.65253	3.56121
3310.87	0.86428	3310.87	3310.87	3310.87	1.83334	2.65472	3.56419
3309.44	0.86508	3309.44	3309.44	3309.44	1.83468	2.65695	3.56715
3308.01	0.86596	3308.01	3308.01	3308.01	1.83601	2.65924	3.57009
3306.58	0.86698	3306.58	3306.58	3306.58	1.83736	2.66158	3.57305
3305.16	0.8682	3305.16	3305.16	3305.16	1.83873	2.66397	3.57603
3303.73	0.8696	3303.73	3303.73	3303.73	1.84015	2.6664	3.57903
3302.3	0.87117	3302.3	3302.3	3302.3	1.84161	2.66888	3.58204
3300.87	0.87284	3300.87	3300.87	3300.87	1.84313	2.67138	3.58506
3299.45	0.87454	3299.45	3299.45	3299.45	1.8447	2.67392	3.58806
3298.02	0.87625	3298.02	3298.02	3298.02	1.84631	2.67646	3.59107
3296.59	0.87795	3296.59	3296.59	3296.59	1.84795	2.67901	3.59409
3295.16	0.87964	3295.16	3295.16	3295.16	1.8496	2.68156	3.59715
3293.73	0.88135	3293.73	3293.73	3293.73	1.85128	2.68411	3.60027
3292.31	0.88309	3292.31	3292.31	3292.31	1.85297	2.68668	3.60343
3290.88	0.88486	3290.88	3290.88	3290.88	1.85468	2.68928	3.6066
3289.45	0.88664	3289.45	3289.45	3289.45	1.8564	2.69193	3.60977
3288.02	0.88836	3288.02	3288.02	3288.02	1.85813	2.69462	3.61292
3286.6	0.88997	3286.6	3286.6	3286.6	1.85986	2.69734	3.61609
3285.17	0.89142	3285.17	3285.17	3285.17	1.86159	2.70008	3.61928
3283.74	0.89273	3283.74	3283.74	3283.74	1.86329	2.70282	3.62252
3282.31	0.89389	3282.31	3282.31	3282.31	1.86492	2.70554	3.62583
3280.89	0.89489	3280.89	3280.89	3280.89	1.86643	2.70821	3.6292
3279.46	0.89574	3279.46	3279.46	3279.46	1.86782	2.71084	3.63264
3278.03	0.89649	3278.03	3278.03	3278.03	1.86917	2.71345	3.63612
3276.6	0.89717	3276.6	3276.6	3276.6	1.87057	2.7161	3.63964
3275.17	0.89785	3275.17	3275.17	3275.17	1.87209	2.71881	3.6432
3273.75	0.8986	3273.75	3273.75	3273.75	1.87374	2.7216	3.64682
3272.32	0.89949	3272.32	3272.32	3272.32	1.87549	2.72446	3.65048
3270.89	0.90059	3270.89	3270.89	3270.89	1.87732	2.72738	3.65416
3269.46	0.90194	3269.46	3269.46	3269.46	1.87915	2.73035	3.65785
3268.04	0.90349	3268.04	3268.04	3268.04	1.88096	2.73336	3.66154
3266.61	0.90518	3266.61	3266.61	3266.61	1.88275	2.73641	3.66524
3265.18	0.9069	3265.18	3265.18	3265.18	1.88454	2.73949	3.66898
3263.75	0.90859	3263.75	3263.75	3263.75	1.88635	2.74262	3.67275
3262.33	0.91022	3262.33	3262.33	3262.33	1.88821	2.7458	3.67658
3260.9	0.91177	3260.9	3260.9	3260.9	1.89006	2.74902	3.68045
3259.47	0.91323	3259.47	3259.47	3259.47	1.89183	2.75223	3.6844
3258.04	0.91463	3258.04	3258.04	3258.04	1.89349	2.75544	3.68842
3256.61	0.916	3256.61	3256.61	3256.61	1.89509	2.75863	3.6925
3255.19	0.91734	3255.19	3255.19	3255.19	1.89674	2.76186	3.69663
3253.76	0.9187	3253.76	3253.76	3253.76	1.89851	2.76513	3.70081
3252.33	0.92008	3252.33	3252.33	3252.33	1.90043	2.76846	3.70503
3250.9	0.92148	3250.9	3250.9	3250.9	1.90246	2.77183	3.70928
3249.48	0.92292	3249.48	3249.48	3249.48	1.90456	2.77524	3.71354
3248.05	0.92443	3248.05	3248.05	3248.05	1.90669	2.77868	3.71781
3246.62	0.92599	3246.62	3246.62	3246.62	1.90882	2.78216	3.72209
3245.19	0.92759	3245.19	3245.19	3245.19	1.91092	2.78564	3.72638
3243.76	0.92918	3243.76	3243.76	3243.76	1.91297	2.78911	3.73073
3242.34	0.93073	3242.34	3242.34	3242.34	1.91498	2.79259	3.73513
3240.91	0.93225	3240.91	3240.91	3240.91	1.91698	2.7961	3.73958
3239.48	0.93375	3239.48	3239.48	3239.48	1.91897	2.79964	3.74406
3238.05	0.93527	3238.05	3238.05	3238.05	1.92091	2.80321	3.74855
3236.63	0.93682	3236.63	3236.63	3236.63	1.92277	2.8068	3.75305
3235.2	0.93843	3235.2	3235.2	3235.2	1.92457	2.81039	3.75756
3233.77	0.94012	3233.77	3233.77	3233.77	1.92637	2.81399	3.76209
3232.34	0.94189	3232.34	3232.34	3232.34	1.92824	2.81762	3.76663
3230.92	0.94372	3230.92	3230.92	3230.92	1.93022	2.82128	3.77118
3229.49	0.94555	3229.49	3229.49	3229.49	1.93227	2.82495	3.77573
3228.06	0.94737	3228.06	3228.06	3228.06	1.93435	2.82863	3.78027
3226.63	0.94915	3226.63	3226.63	3226.63	1.93644	2.83231	3.7848
3225.2	0.95089	3225.2	3225.2	3225.2	1.93852	2.83598	3.78933
3223.78	0.95258	3223.78	3223.78	3223.78	1.94057	2.83963	3.79386
3222.35	0.95419	3222.35	3222.35	3222.35	1.94258	2.84325	3.79841
3220.92	0.95572	3220.92	3220.92	3220.92	1.94452	2.84683	3.80297
3219.49	0.95718	3219.49	3219.49	3219.49	1.94641	2.85038	3.80754
3218.07	0.95858	3218.07	3218.07	3218.07	1.94824	2.85392	3.81211
3216.64	0.95996	3216.64	3216.64	3216.64	1.94997	2.85745	3.81666
3215.21	0.96134	3215.21	3215.21	3215.21	1.9516	2.86096	3.8212
3213.78	0.96275	3213.78	3213.78	3213.78	1.95315	2.86446	3.82572
3212.36	0.96417	3212.36	3212.36	3212.36	1.95468	2.86796	3.83023
3210.93	0.96561	3210.93	3210.93	3210.93	1.95623	2.87147	3.83473
3209.5	0.96705	3209.5	3209.5	3209.5	1.95782	2.87497	3.83922
3208.07	0.96848	3208.07	3208.07	3208.07	1.95944	2.87846	3.84368
3206.64	0.96988	3206.64	3206.64	3206.64	1.96105	2.88191	3.84811
3205.22	0.97126	3205.22	3205.22	3205.22	1.96262	2.88532	3.85248
3203.79	0.97261	3203.79	3203.79	3203.79	1.96418	2.88868	3.8568
3202.36	0.97393	3202.36	3202.36	3202.36	1.96574	2.892	3.86108
3200.93	0.97518	3200.93	3200.93	3200.93	1.96734	2.8953	3.86532
3199.51	0.97638	3199.51	3199.51	3199.51	1.96897	2.89858	3.86954
3198.08	0.97752	3198.08	3198.08	3198.08	1.97057	2.90185	3.87372
3196.65	0.97861	3196.65	3196.65	3196.65	1.97211	2.90509	3.87786
3195.22	0.97968	3195.22	3195.22	3195.22	1.97356	2.90829	3.88196
3193.79	0.98074	3193.79	3193.79	3193.79	1.97492	2.91143	3.88602
3192.37	0.98178	3192.37	3192.37	3192.37	1.97618	2.91454	3.89004
3190.94	0.9828	3190.94	3190.94	3190.94	1.9774	2.91761	3.89401
3189.51	0.98379	3189.51	3189.51	3189.51	1.97859	2.92065	3.89794
3188.08	0.98474	3188.08	3188.08	3188.08	1.97975	2.92366	3.9018
3186.66	0.98565	3186.66	3186.66	3186.66	1.98086	2.92662	3.90561
3185.23	0.98654	3185.23	3185.23	3185.23	1.98189	2.92952	3.90935
3183.8	0.9874	3183.8	3183.8	3183.8	1.98283	2.93235	3.91301
3182.37	0.98823	3182.37	3182.37	3182.37	1.98373	2.9351	3.91659
3180.95	0.98901	3180.95	3180.95	3180.95	1.98464	2.9378	3.92011
3179.52	0.98972	3179.52	3179.52	3179.52	1.98558	2.94046	3.92358
3178.09	0.99037	3178.09	3178.09	3178.09	1.98656	2.94309	3.92702
3176.66	0.99095	3176.66	3176.66	3176.66	1.98753	2.94567	3.93041
3175.23	0.9915	3175.23	3175.23	3175.23	1.98846	2.94819	3.93373
3173.81	0.99203	3173.81	3173.81	3173.81	1.98931	2.95063	3.93696
3172.38	0.99256	3172.38	3172.38	3172.38	1.99007	2.95298	3.9401
3170.95	0.99305	3170.95	3170.95	3170.95	1.99075	2.95526	3.94316
3169.52	0.99346	3169.52	3169.52	3169.52	1.99135	2.95748	3.94614
3168.1	0.99379	3168.1	3168.1	3168.1	1.9919	2.95967	3.94905
3166.67	0.99398	3166.67	3166.67	3166.67	1.99238	2.96181	3.95187
3165.24	0.99406	3165.24	3165.24	3165.24	1.99275	2.9639	3.9546
3163.81	0.99403	3163.81	3163.81	3163.81	1.99297	2.96588	3.95723
3162.39	0.99392	3162.39	3162.39	3162.39	1.99302	2.96772	3.95978
3160.96	0.99381	3160.96	3160.96	3160.96	1.99296	2.96944	3.96223
3159.53	0.99371	3159.53	3159.53	3159.53	1.99288	2.97108	3.9646
3158.1	0.99417	3158.1	3158.1	3158.1	1.99323	2.97268	3.96689
3156.67	0.99456	3156.67	3156.67	3156.67	1.99364	2.97426	3.96908
3155.25	0.99492	3155.25	3155.25	3155.25	1.9941	2.97581	3.97118
3153.82	0.99528	3153.82	3153.82	3153.82	1.9946	2.97732	3.97319
3152.39	0.9957	3152.39	3152.39	3152.39	1.9951	2.97877	3.9751
3150.96	0.99617	3150.96	3150.96	3150.96	1.99557	2.98016	3.9769
3149.54	0.99667	3149.54	3149.54	3149.54	1.99596	2.98146	3.97859
3148.11	0.99713	3148.11	3148.11	3148.11	1.99627	2.98268	3.98018
3146.68	0.99751	3146.68	3146.68	3146.68	1.99652	2.98384	3.98168
3145.25	0.99777	3145.25	3145.25	3145.25	1.99672	2.98496	3.98311
3143.82	0.99791	3143.82	3143.82	3143.82	1.99682	2.98602	3.98444
3142.4	0.99798	3142.4	3142.4	3142.4	1.99678	2.98698	3.98566
3140.97	0.99801	3140.97	3140.97	3140.97	1.9967	2.9878	3.98676
3139.54	0.998	3139.54	3139.54	3139.54	1.99663	2.98849	3.98775
3138.11	0.99796	3138.11	3138.11	3138.11	1.99652	2.98909	3.98863
3136.69	0.9979	3136.69	3136.69	3136.69	1.99641	2.98966	3.98943
3135.26	0.9978	3135.26	3135.26	3135.26	1.99634	2.99021	3.99013
3133.83	0.99769	3133.83	3133.83	3133.83	1.9963	2.99076	3.99073
3132.4	0.99765	3132.4	3132.4	3132.4	1.99628	2.99127	3.99122
3130.98	0.99757	3130.98	3130.98	3130.98	1.99622	2.99171	3.99161
3129.55	0.99754	3129.55	3129.55	3129.55	1.99614	2.99203	3.9919
3128.12	0.99747	3128.12	3128.12	3128.12	1.99606	2.9922	3.99208
3126.69	0.99726	3126.69	3126.69	3126.69	1.996	2.9922	3.99217
3125.26	0.9969	3125.26	3125.26	3125.26	1.99584	2.99209	3.99219
3123.84	0.99641	3123.84	3123.84	3123.84	1.99578	2.99192	3.99215
3122.41	0.99584	3122.41	3122.41	3122.41	1.99572	2.99176	3.99206
3120.98	0.99528	3120.98	3120.98	3120.98	1.99562	2.99159	3.99193
3119.55	0.99483	3119.55	3119.55	3119.55	1.99551	2.99143	3.99176
3118.13	0.99452	3118.13	3118.13	3118.13	1.99533	2.99125	3.99157
3116.7	0.99439	3116.7	3116.7	3116.7	1.99513	2.9911	3.99137
3115.27	0.99442	3115.27	3115.27	3115.27	1.99498	2.99099	3.99118
3113.84	0.99458	3113.84	3113.84	3113.84	1.99491	2.99095	3.99101
3112.42	0.99481	3112.42	3112.42	3112.42	1.99489	2.99096	3.99084
3110.99	0.99508	3110.99	3110.99	3110.99	1.99491	2.99101	3.99067
3109.56	0.99535	3109.56	3109.56	3109.56	1.99492	2.99104	3.99048
3108.13	0.99561	3108.13	3108.13	3108.13	1.9949	2.99103	3.99031
3106.7	0.99582	3106.7	3106.7	3106.7	1.99484	2.99097	3.99012
3105.28	0.99594	3105.28	3105.28	3105.28	1.99474	2.99086	3.98994
3103.85	0.99595	3103.85	3103.85	3103.85	1.99463	2.99072	3.98976
3102.42	0.99585	3102.42	3102.42	3102.42	1.99454	2.99057	3.98958
3100.99	0.99579	3100.99	3100.99	3100.99	1.99443	2.99043	3.98941
3099.57	0.99572	3099.57	3099.57	3099.57	1.99429	2.99032	3.98926
3098.14	0.99565	3098.14	3098.14	3098.14	1.99423	2.99021	3.98911
3096.71	0.99558	3096.71	3096.71	3096.71	1.99415	2.9901	3.98898
3095.28	0.99548	3095.28	3095.28	3095.28	1.99406	2.98999	3.98885
3093.85	0.99538	3093.85	3093.85	3093.85	1.99396	2.9899	3.98873
3092.43	0.9952	3092.43	3092.43	3092.43	1.99387	2.98982	3.98862
3091	0.99495	3091	3091	3091	1.99382	2.98975	3.98849
3089.57	0.99465	3089.57	3089.57	3089.57	1.99373	2.98966	3.98836
3088.14	0.99434	3088.14	3088.14	3088.14	1.99357	2.98952	3.98823
3086.72	0.99403	3086.72	3086.72	3086.72	1.99339	2.98936	3.98811
3085.29	0.99374	3085.29	3085.29	3085.29	1.99326	2.98921	3.98801
3083.86	0.99348	3083.86	3083.86	3083.86	1.99318	2.98909	3.98792
3082.43	0.99327	3082.43	3082.43	3082.43	1.99317	2.98901	3.98783
3081.01	0.99315	3081.01	3081.01	3081.01	1.99322	2.98896	3.98772
3079.58	0.99312	3079.58	3079.58	3079.58	1.99327	2.98891	3.98755
3078.15	0.99321	3078.15	3078.15	3078.15	1.99325	2.98884	3.98726
3076.72	0.99338	3076.72	3076.72	3076.72	1.99317	2.9887	3.9868
3075.29	0.99361	3075.29	3075.29	3075.29	1.99311	2.98848	3.98614
3073.87	0.99384	3073.87	3073.87	3073.87	1.99308	2.98818	3.98525
3072.44	0.99405	3072.44	3072.44	3072.44	1.99304	2.98779	3.98413
3071.01	0.9942	3071.01	3071.01	3071.01	1.993	2.98732	3.98273
3069.58	0.99429	3069.58	3069.58	3069.58	1.99297	2.98672	3.98104
3068.16	0.99431	3068.16	3068.16	3068.16	1.99288	2.98597	3.97903
3066.73	0.99425	3066.73	3066.73	3066.73	1.99267	2.98502	3.97668
3065.3	0.99415	3065.3	3065.3	3065.3	1.99232	2.98385	3.97402
3063.87	0.9941	3063.87	3063.87	3063.87	1.99187	2.9825	3.97105
3062.45	0.99403	3062.45	3062.45	3062.45	1.99134	2.98097	3.96778
3061.02	0.99391	3061.02	3061.02	3061.02	1.99069	2.97924	3.96421
3059.59	0.99351	3059.59	3059.59	3059.59	1.9899	2.97734	3.96036
3058.16	0.99279	3058.16	3058.16	3058.16	1.98894	2.97525	3.95621
3056.73	0.99173	3056.73	3056.73	3056.73	1.98773	2.97295	3.95179
3055.31	0.99031	3055.31	3055.31	3055.31	1.98622	2.97041	3.9471
3053.88	0.98852	3053.88	3053.88	3053.88	1.9844	2.96761	3.94216
3052.45	0.98636	3052.45	3052.45	3052.45	1.98226	2.96457	3.93701
3051.02	0.98384	3051.02	3051.02	3051.02	1.97982	2.96132	3.93168
3049.6	0.98096	3049.6	3049.6	3049.6	1.97712	2.95791	3.92623
3048.17	0.97775	3048.17	3048.17	3048.17	1.9742	2.95437	3.92066
3046.74	0.97422	3046.74	3046.74	3046.74	1.97108	2.9507	3.91499
3045.31	0.97039	3045.31	3045.31	3045.31	1.96775	2.94686	3.90922
3043.88	0.96628	3043.88	3043.88	3043.88	1.96421	2.94282	3.90334
3042.46	0.9619	3042.46	3042.46	3042.46	1.96045	2.93858	3.89735
3041.03	0.9572	3041.03	3041.03	3041.03	1.95649	2.93412	3.89124
3039.6	0.95216	3039.6	3039.6	3039.6	1.95231	2.92943	3.88499
3038.17	0.94671	3038.17	3038.17	3038.17	1.9479	2.9245	3.87856
3036.75	0.94083	3036.75	3036.75	3036.75	1.94321	2.91928	3.87191
3035.32	0.93447	3035.32	3035.32	3035.32	1.9382	2.91375	3.86499
3033.89	0.92763	3033.89	3033.89	3033.89	1.93281	2.90783	3.85776
3032.46	0.92029	3032.46	3032.46	3032.46	1.92696	2.90147	3.85014
3031.04	0.91238	3031.04	3031.04	3031.04	1.92061	2.89464	3.84209
3029.61	0.90387	3029.61	3029.61	3029.61	1.91374	2.88731	3.83354
3028.18	0.89471	3028.18	3028.18	3028.18	1.90636	2.87949	3.82444
3026.75	0.88494	3026.75	3026.75	3026.75	1.89849	2.87118	3.81478
3025.32	0.87456	3025.32	3025.32	3025.32	1.89016	2.86236	3.80454
3023.9	0.86366	3023.9	3023.9	3023.9	1.88137	2.85299	3.7937
3022.47	0.85232	3022.47	3022.47	3022.47	1.87213	2.84308	3.78228
3021.04	0.84065	3021.04	3021.04	3021.04	1.86253	2.83266	3.77031
3019.61	0.82878	3019.61	3019.61	3019.61	1.85269	2.82183	3.7579
3018.19	0.81682	3018.19	3018.19	3018.19	1.84276	2.81069	3.74515
3016.76	0.80493	3016.76	3016.76	3016.76	1.83285	2.79936	3.73218
3015.33	0.79323	3015.33	3015.33	3015.33	1.82301	2.78791	3.71908
3013.9	0.78186	3013.9	3013.9	3013.9	1.8133	2.77642	3.70597
3012.48	0.77094	3012.48	3012.48	3012.48	1.80375	2.76499	3.69295
3011.05	0.76051	3011.05	3011.05	3011.05	1.79442	2.7537	3.68012
3009.62	0.75059	3009.62	3009.62	3009.62	1.78532	2.74264	3.66759
3008.19	0.74113	3008.19	3008.19	3008.19	1.77647	2.73186	3.65543
3006.76	0.73212	3006.76	3006.76	3006.76	1.76786	2.72142	3.64369
3005.34	0.72352	3005.34	3005.34	3005.34	1.75952	2.71136	3.63242
3003.91	0.71534	3003.91	3003.91	3003.91	1.75146	2.7017	3.62167
3002.48	0.70763	3002.48	3002.48	3002.48	1.7437	2.69247	3.61148
3001.05	0.7004	3001.05	3001.05	3001.05	1.73628	2.6837	3.60188
2999.63	0.69372	2999.63	2999.63	2999.63	1.72931	2.67545	3.59294
2998.2	0.68764	2998.2	2998.2	2998.2	1.72293	2.66783	3.58469
2996.77	0.68223	2996.77	2996.77	2996.77	1.71725	2.66094	3.57722
2995.34	0.67754	2995.34	2995.34	2995.34	1.71237	2.65486	3.5706
2993.91	0.67362	2993.91	2993.91	2993.91	1.70831	2.64965	3.56486
2992.49	0.67046	2992.49	2992.49	2992.49	1.70504	2.64531	3.56002
2991.06	0.66805	2991.06	2991.06	2991.06	1.70248	2.64183	3.55609
2989.63	0.6663	2989.63	2989.63	2989.63	1.70055	2.63916	3.553
2988.2	0.66507	2988.2	2988.2	2988.2	1.69914	2.63722	3.55071
2986.78	0.66418	2986.78	2986.78	2986.78	1.69807	2.63586	3.54908
2985.35	0.66345	2985.35	2985.35	2985.35	1.69716	2.63491	3.54794
2983.92	0.6627	2983.92	2983.92	2983.92	1.69625	2.63413	3.54709
2982.49	0.66177	2982.49	2982.49	2982.49	1.69516	2.63329	3.54627
2981.07	0.66049	2981.07	2981.07	2981.07	1.69374	2.63212	3.54523
2979.64	0.65876	2979.64	2979.64	2979.64	1.69183	2.63039	3.5437
2978.21	0.65647	2978.21	2978.21	2978.21	1.68935	2.62789	3.54149
2976.78	0.65357	2976.78	2976.78	2976.78	1.68625	2.6245	3.53843
2975.35	0.65004	2975.35	2975.35	2975.35	1.68253	2.62013	3.53442
2973.93	0.6459	2973.93	2973.93	2973.93	1.67825	2.6148	3.52946
2972.5	0.64123	2972.5	2972.5	2972.5	1.67347	2.60858	3.52359
2971.07	0.63612	2971.07	2971.07	2971.07	1.66832	2.6016	3.51695
2969.64	0.63068	2969.64	2969.64	2969.64	1.6629	2.59404	3.50972
2968.22	0.62507	2968.22	2968.22	2968.22	1.65735	2.58613	3.50213
2966.79	0.61943	2966.79	2966.79	2966.79	1.6518	2.57811	3.49442
2965.36	0.61391	2965.36	2965.36	2965.36	1.64637	2.57024	3.48684
2963.93	0.60865	2963.93	2963.93	2963.93	1.64118	2.56273	3.47959
2962.51	0.60375	2962.51	2962.51	2962.51	1.6363	2.55576	3.47287
2961.08	0.59928	2961.08	2961.08	2961.08	1.63184	2.54949	3.4668
2959.65	0.59533	2959.65	2959.65	2959.65	1.62789	2.54404	3.4615
2958.22	0.59194	2958.22	2958.22	2958.22	1.62451	2.53949	3.45703
2956.79	0.58916	2956.79	2956.79	2956.79	1.62169	2.53586	3.4534
2955.37	0.58704	2955.37	2955.37	2955.37	1.61944	2.53314	3.45064
2953.94	0.58561	2953.94	2953.94	2953.94	1.61779	2.53129	3.44873
2952.51	0.58493	2952.51	2952.51	2952.51	1.6168	2.53033	3.44771
2951.08	0.58502	2951.08	2951.08	2951.08	1.61658	2.53023	3.44759
2949.66	0.5859	2949.66	2949.66	2949.66	1.61723	2.531	3.44838
2948.23	0.58759	2948.23	2948.23	2948.23	1.61879	2.5326	3.45008
2946.8	0.59007	2946.8	2946.8	2946.8	1.62125	2.53498	3.45269
2945.37	0.59333	2945.37	2945.37	2945.37	1.62455	2.53808	3.45618
2943.95	0.59732	2943.95	2943.95	2943.95	1.62863	2.5418	3.4605
2942.52	0.60196	2942.52	2942.52	2942.52	1.63335	2.54605	3.46558
2941.09	0.60714	2941.09	2941.09	2941.09	1.63861	2.55071	3.47133
2939.66	0.61273	2939.66	2939.66	2939.66	1.64424	2.55565	3.47763
2938.23	0.61862	2938.23	2938.23	2938.23	1.65017	2.56081	3.4844
2936.81	0.62472	2936.81	2936.81	2936.81	1.65629	2.5661	3.49153
2935.38	0.63096	2935.38	2935.38	2935.38	1.66251	2.57147	3.49894
2933.95	0.63728	2933.95	2933.95	2933.95	1.66874	2.57689	3.50656
2932.52	0.64364	2932.52	2932.52	2932.52	1.67495	2.58237	3.51433
2931.1	0.65003	2931.1	2931.1	2931.1	1.68118	2.588	3.52223
2929.67	0.65644	2929.67	2929.67	2929.67	1.68748	2.5939	3.53028
2928.24	0.66287	2928.24	2928.24	2928.24	1.69393	2.60018	3.53851
2926.81	0.66936	2926.81	2926.81	2926.81	1.70056	2.60695	3.54692
2925.38	0.67592	2925.38	2925.38	2925.38	1.70733	2.61428	3.55551
2923.96	0.68259	2923.96	2923.96	2923.96	1.7142	2.6222	3.56428
2922.53	0.68938	2922.53	2922.53	2922.53	1.72114	2.6307	3.57323
2921.1	0.69632	2921.1	2921.1	2921.1	1.72813	2.63975	3.58236
2919.67	0.70336	2919.67	2919.67	2919.67	1.73517	2.64928	3.59168
2918.25	0.7105	2918.25	2918.25	2918.25	1.74219	2.65915	3.60112
2916.82	0.71768	2916.82	2916.82	2916.82	1.74912	2.66918	3.61062
2915.39	0.72485	2915.39	2915.39	2915.39	1.75587	2.67918	3.62004
2913.96	0.73191	2913.96	2913.96	2913.96	1.76234	2.68894	3.62926
2912.54	0.73874	2912.54	2912.54	2912.54	1.76843	2.69825	3.63813
2911.11	0.74515	2911.11	2911.11	2911.11	1.77402	2.70689	3.64648
2909.68	0.75098	2909.68	2909.68	2909.68	1.77905	2.7147	3.65416
2908.25	0.75603	2908.25	2908.25	2908.25	1.7834	2.72156	3.66099
2906.82	0.76019	2906.82	2906.82	2906.82	1.787	2.72736	3.66686
2905.4	0.76335	2905.4	2905.4	2905.4	1.78975	2.73203	3.67166
2903.97	0.76548	2903.97	2903.97	2903.97	1.79162	2.73556	3.67536
2902.54	0.76659	2902.54	2902.54	2902.54	1.79261	2.738	3.67796
2901.11	0.76673	2901.11	2901.11	2901.11	1.79278	2.73941	3.67954
2899.69	0.766	2899.69	2899.69	2899.69	1.79224	2.73995	3.6802
2898.26	0.76452	2898.26	2898.26	2898.26	1.79117	2.73978	3.68011
2896.83	0.76248	2896.83	2896.83	2896.83	1.7897	2.73907	3.67946
2895.4	0.76009	2895.4	2895.4	2895.4	1.78794	2.738	3.67843
2893.98	0.75758	2893.98	2893.98	2893.98	1.78602	2.73673	3.67719
2892.55	0.75513	2892.55	2892.55	2892.55	1.78405	2.73543	3.67592
2891.12	0.7529	2891.12	2891.12	2891.12	1.78219	2.73426	3.6748
2889.69	0.75103	2889.69	2889.69	2889.69	1.78062	2.73342	3.67403
2888.26	0.74965	2888.26	2888.26	2888.26	1.77951	2.73305	3.67379
2886.84	0.74886	2886.84	2886.84	2886.84	1.77901	2.73331	3.67425
2885.41	0.74881	2885.41	2885.41	2885.41	1.77922	2.73428	3.67555
2883.98	0.74959	2883.98	2883.98	2883.98	1.78017	2.736	3.67776
2882.55	0.75131	2882.55	2882.55	2882.55	1.78193	2.73852	3.68098
2881.13	0.75402	2881.13	2881.13	2881.13	1.78459	2.74191	3.68525
2879.7	0.75774	2879.7	2879.7	2879.7	1.78823	2.74621	3.69064
2878.27	0.76246	2878.27	2878.27	2878.27	1.79286	2.75144	3.69711
2876.84	0.7681	2876.84	2876.84	2876.84	1.7984	2.75755	3.70457
2875.41	0.77461	2875.41	2875.41	2875.41	1.80473	2.76445	3.71291
2873.99	0.78189	2873.99	2873.99	2873.99	1.8117	2.772	3.72197
2872.56	0.78982	2872.56	2872.56	2872.56	1.81912	2.78003	3.73158
2871.13	0.79824	2871.13	2871.13	2871.13	1.82681	2.78834	3.74157
2869.7	0.80697	2869.7	2869.7	2869.7	1.83461	2.79672	3.75175
2868.28	0.81581	2868.28	2868.28	2868.28	1.8424	2.80499	3.76193
2866.85	0.82459	2866.85	2866.85	2866.85	1.85006	2.81298	3.77198
2865.42	0.83317	2865.42	2865.42	2865.42	1.85753	2.82055	3.78176
2863.99	0.84143	2863.99	2863.99	2863.99	1.86472	2.82759	3.79118
2862.57	0.84931	2862.57	2862.57	2862.57	1.87156	2.83405	3.80017
2861.14	0.85676	2861.14	2861.14	2861.14	1.87799	2.83993	3.80866
2859.71	0.86379	2859.71	2859.71	2859.71	1.88403	2.84534	3.81664
2858.28	0.87037	2858.28	2858.28	2858.28	1.8897	2.85043	3.82412
2856.85	0.87651	2856.85	2856.85	2856.85	1.89502	2.85539	3.83115
2855.43	0.8822	2855.43	2855.43	2855.43	1.90003	2.86036	3.8378
2854	0.88747	2854	2854	2854	1.90475	2.86547	3.84412
2852.57	0.89235	2852.57	2852.57	2852.57	1.90919	2.87078	3.85018
2851.14	0.89691	2851.14	2851.14	2851.14	1.91333	2.87629	3.85602
2849.72	0.90121	2849.72	2849.72	2849.72	1.91714	2.88195	3.86166
2848.29	0.9053	2848.29	2848.29	2848.29	1.92059	2.88768	3.86714
2846.86	0.90924	2846.86	2846.86	2846.86	1.92377	2.89339	3.87251
2845.43	0.91307	2845.43	2845.43	2845.43	1.92677	2.89905	3.8778
2844.01	0.91682	2844.01	2844.01	2844.01	1.92971	2.90459	3.88305
2842.58	0.92053	2842.58	2842.58	2842.58	1.93267	2.90998	3.88828
2841.15	0.92424	2841.15	2841.15	2841.15	1.93571	2.91516	3.8935
2839.72	0.92801	2839.72	2839.72	2839.72	1.93883	2.92013	3.89873
2838.29	0.93186	2838.29	2838.29	2838.29	1.94202	2.92487	3.90397
2836.87	0.9358	2836.87	2836.87	2836.87	1.94527	2.92941	3.9092
2835.44	0.93978	2835.44	2835.44	2835.44	1.94856	2.93375	3.91439
2834.01	0.94376	2834.01	2834.01	2834.01	1.95188	2.93793	3.91955
2832.58	0.94769	2832.58	2832.58	2832.58	1.95523	2.94197	3.92467
2831.16	0.95155	2831.16	2831.16	2831.16	1.95856	2.94587	3.92974
2829.73	0.95531	2829.73	2829.73	2829.73	1.9618	2.94963	3.93474
2828.3	0.95896	2828.3	2828.3	2828.3	1.96487	2.95322	3.93962
2826.87	0.96248	2826.87	2826.87	2826.87	1.96773	2.95664	3.94433
2825.44	0.96587	2825.44	2825.44	2825.44	1.97041	2.95992	3.94888
2824.02	0.9691	2824.02	2824.02	2824.02	1.97295	2.9631	3.95328
2822.59	0.97217	2822.59	2822.59	2822.59	1.97538	2.9662	3.95752
2821.16	0.97507	2821.16	2821.16	2821.16	1.97771	2.9692	3.9616
2819.73	0.97782	2819.73	2819.73	2819.73	1.97987	2.97208	3.96547
2818.31	0.9804	2818.31	2818.31	2818.31	1.98186	2.9748	3.96911
2816.88	0.98282	2816.88	2816.88	2816.88	1.98366	2.97733	3.97251
2815.45	0.98506	2815.45	2815.45	2815.45	1.9853	2.97966	3.97568
2814.02	0.98707	2814.02	2814.02	2814.02	1.9868	2.98179	3.9786
2812.6	0.98882	2812.6	2812.6	2812.6	1.98817	2.9837	3.98127
2811.17	0.9903	2811.17	2811.17	2811.17	1.98942	2.98541	3.98365
2809.74	0.99146	2809.74	2809.74	2809.74	1.99047	2.98687	3.98568
2808.31	0.99234	2808.31	2808.31	2808.31	1.99131	2.9881	3.98739
2806.88	0.99293	2806.88	2806.88	2806.88	1.99194	2.98915	3.9888
2805.46	0.99325	2805.46	2805.46	2805.46	1.99239	2.99008	3.98998
2804.03	0.99332	2804.03	2804.03	2804.03	1.99269	2.99093	3.99095
2802.6	0.99324	2802.6	2802.6	2802.6	1.99286	2.99172	3.99175
2801.17	0.99316	2801.17	2801.17	2801.17	1.99288	2.99246	3.99242
2799.75	0.99296	2799.75	2799.75	2799.75	1.9928	2.99313	3.99299
2798.32	0.99312	2798.32	2798.32	2798.32	1.99318	2.9937	3.99346
2796.89	0.99328	2796.89	2796.89	2796.89	1.99339	2.99418	3.99389
2795.46	0.99348	2795.46	2795.46	2795.46	1.99351	2.99459	3.99431
2794.04	0.99371	2794.04	2794.04	2794.04	1.99359	2.99496	3.99475
2792.61	0.99396	2792.61	2792.61	2792.61	1.99371	2.9953	3.99523
2791.18	0.99422	2791.18	2791.18	2791.18	1.9939	2.99562	3.99578
2789.75	0.99449	2789.75	2789.75	2789.75	1.99419	2.99592	3.99634
2788.32	0.99475	2788.32	2788.32	2788.32	1.99454	2.99615	3.99688
2786.9	0.99497	2786.9	2786.9	2786.9	1.99488	2.99625	3.99731
2785.47	0.99516	2785.47	2785.47	2785.47	1.99519	2.99625	3.99765
2784.04	0.9953	2784.04	2784.04	2784.04	1.99545	2.99617	3.99793
2782.61	0.99536	2782.61	2782.61	2782.61	1.99567	2.99605	3.99815
2781.19	0.99535	2781.19	2781.19	2781.19	1.99586	2.9959	3.99832
2779.76	0.99528	2779.76	2779.76	2779.76	1.99596	2.99574	3.99843
2778.33	0.99519	2778.33	2778.33	2778.33	1.99593	2.99556	3.99846
2776.9	0.99509	2776.9	2776.9	2776.9	1.99573	2.99535	3.99839
2775.47	0.99504	2775.47	2775.47	2775.47	1.9954	2.99514	3.99828
2774.05	0.99501	2774.05	2774.05	2774.05	1.99497	2.99497	3.99814
2772.62	0.99501	2772.62	2772.62	2772.62	1.99453	2.99485	3.998
2771.19	0.99502	2771.19	2771.19	2771.19	1.99413	2.9948	3.99787
2769.76	0.99503	2769.76	2769.76	2769.76	1.99381	2.99481	3.99775
2768.34	0.99505	2768.34	2768.34	2768.34	1.99361	2.99487	3.99764
2766.91	0.99507	2766.91	2766.91	2766.91	1.99353	2.99495	3.99755
2765.48	0.99508	2765.48	2765.48	2765.48	1.99355	2.99501	3.99746
2764.05	0.99507	2764.05	2764.05	2764.05	1.99365	2.99505	3.99734
2762.63	0.99502	2762.63	2762.63	2762.63	1.99382	2.99506	3.9972
2761.2	0.99494	2761.2	2761.2	2761.2	1.99404	2.99506	3.99704
2759.77	0.99487	2759.77	2759.77	2759.77	1.99431	2.99506	3.9969
2758.34	0.99482	2758.34	2758.34	2758.34	1.9946	2.99506	3.99677
2756.91	0.99475	2756.91	2756.91	2756.91	1.99483	2.99506	3.99662
2755.49	0.99467	2755.49	2755.49	2755.49	1.99498	2.99506	3.99646
2754.06	0.9946	2754.06	2754.06	2754.06	1.99503	2.99504	3.99629
2752.63	0.99453	2752.63	2752.63	2752.63	1.99499	2.99501	3.99612
2751.2	0.99445	2751.2	2751.2	2751.2	1.9949	2.99499	3.99596
2749.78	0.99438	2749.78	2749.78	2749.78	1.9948	2.99497	3.99582
2748.35	0.99431	2748.35	2748.35	2748.35	1.99474	2.99494	3.9957
2746.92	0.99423	2746.92	2746.92	2746.92	1.99468	2.99488	3.99556
2745.49	0.99415	2745.49	2745.49	2745.49	1.99458	2.99478	3.9954
2744.07	0.99409	2744.07	2744.07	2744.07	1.99445	2.99465	3.99523
2742.64	0.99403	2742.64	2742.64	2742.64	1.99433	2.99451	3.99506
2741.21	0.99397	2741.21	2741.21	2741.21	1.99424	2.99439	3.9949
2739.78	0.99391	2739.78	2739.78	2739.78	1.9942	2.99429	3.99475
2738.35	0.99378	2738.35	2738.35	2738.35	1.99421	2.9942	3.99461
2736.93	0.99361	2736.93	2736.93	2736.93	1.99422	2.99409	3.99446
2735.5	0.9934	2735.5	2735.5	2735.5	1.99414	2.99394	3.9943
2734.07	0.99315	2734.07	2734.07	2734.07	1.99406	2.99374	3.99411
2732.64	0.99288	2732.64	2732.64	2732.64	1.99389	2.99351	3.99391
2731.22	0.99257	2731.22	2731.22	2731.22	1.99365	2.99327	3.9937
2729.79	0.99223	2729.79	2729.79	2729.79	1.9934	2.99305	3.99348
2728.36	0.99186	2728.36	2728.36	2728.36	1.99317	2.99285	3.99326
2726.93	0.99147	2726.93	2726.93	2726.93	1.99294	2.99269	3.99303
2725.5	0.99109	2725.5	2725.5	2725.5	1.9927	2.99254	3.99278
2724.08	0.99074	2724.08	2724.08	2724.08	1.99244	2.99241	3.9925
2722.65	0.99043	2722.65	2722.65	2722.65	1.99218	2.99228	3.99217
2721.22	0.99016	2721.22	2721.22	2721.22	1.99196	2.99218	3.99182
2719.79	0.98991	2719.79	2719.79	2719.79	1.99183	2.99213	3.99149
2718.37	0.98969	2718.37	2718.37	2718.37	1.99183	2.99213	3.99121
2716.94	0.98952	2716.94	2716.94	2716.94	1.99195	2.99218	3.991
2715.51	0.98942	2715.51	2715.51	2715.51	1.99214	2.99225	3.99087
2714.08	0.98942	2714.08	2714.08	2714.08	1.99234	2.99231	3.99081
2712.66	0.98952	2712.66	2712.66	2712.66	1.9925	2.99236	3.99081
2711.23	0.98972	2711.23	2711.23	2711.23	1.99261	2.9924	3.9909
2709.8	0.99	2709.8	2709.8	2709.8	1.9927	2.99244	3.9911
2708.37	0.99035	2708.37	2708.37	2708.37	1.99278	2.99249	3.99137
2706.94	0.99073	2706.94	2706.94	2706.94	1.99286	2.99255	3.9917
2705.52	0.99112	2705.52	2705.52	2705.52	1.99291	2.99262	3.99205
2704.09	0.99152	2704.09	2704.09	2704.09	1.99288	2.99267	3.9924
2702.66	0.99189	2702.66	2702.66	2702.66	1.99284	2.99267	3.99271
2701.23	0.99221	2701.23	2701.23	2701.23	1.99279	2.99262	3.99295
2699.81	0.99246	2699.81	2699.81	2699.81	1.99272	2.99255	3.99311
2698.38	0.99263	2698.38	2698.38	2698.38	1.99263	2.99246	3.9932
2696.95	0.99271	2696.95	2696.95	2696.95	1.99256	2.99237	3.99323
2695.52	0.9927	2695.52	2695.52	2695.52	1.99252	2.99228	3.99323
2694.1	0.99266	2694.1	2694.1	2694.1	1.9925	2.99221	3.99318
2692.67	0.99261	2692.67	2692.67	2692.67	1.99249	2.99214	3.99309
2691.24	0.99256	2691.24	2691.24	2691.24	1.99246	2.99206	3.99297
2689.81	0.9925	2689.81	2689.81	2689.81	1.99242	2.99196	3.99282
2688.38	0.99243	2688.38	2688.38	2688.38	1.99239	2.99187	3.99266
2686.96	0.99238	2686.96	2686.96	2686.96	1.99235	2.99177	3.99254
2685.53	0.99231	2685.53	2685.53	2685.53	1.99232	2.99166	3.99245
2684.1	0.99224	2684.1	2684.1	2684.1	1.99228	2.99156	3.99241
2682.67	0.99217	2682.67	2682.67	2682.67	1.99225	2.99145	3.9924
2681.25	0.99213	2681.25	2681.25	2681.25	1.99221	2.99133	3.9924
2679.82	0.9921	2679.82	2679.82	2679.82	1.99217	2.99122	3.99244
2678.39	0.99223	2678.39	2678.39	2678.39	1.99214	2.99115	3.9925
2676.96	0.99238	2676.96	2676.96	2676.96	1.99215	2.99113	3.9926
2675.53	0.99252	2675.53	2675.53	2675.53	1.99221	2.99115	3.99275
2674.11	0.99267	2674.11	2674.11	2674.11	1.99231	2.99119	3.99292
2672.68	0.99283	2672.68	2672.68	2672.68	1.99245	2.99126	3.99308
2671.25	0.99297	2671.25	2671.25	2671.25	1.99259	2.99131	3.99322
2669.82	0.99312	2669.82	2669.82	2669.82	1.99274	2.99134	3.99334
2668.4	0.99324	2668.4	2668.4	2668.4	1.99286	2.99134	3.99343
2666.97	0.99332	2666.97	2666.97	2666.97	1.99298	2.99131	3.99348
2665.54	0.99334	2665.54	2665.54	2665.54	1.9931	2.99128	3.99351
2664.11	0.99332	2664.11	2664.11	2664.11	1.99322	2.99124	3.99353
2662.69	0.99325	2662.69	2662.69	2662.69	1.99331	2.9912	3.99354
2661.26	0.99317	2661.26	2661.26	2661.26	1.99335	2.99116	3.99355
2659.83	0.99309	2659.83	2659.83	2659.83	1.99335	2.99114	3.99354
2658.4	0.99302	2658.4	2658.4	2658.4	1.99333	2.99113	3.99352
2656.97	0.99297	2656.97	2656.97	2656.97	1.99331	2.99116	3.9935
2655.55	0.99291	2655.55	2655.55	2655.55	1.99332	2.99121	3.9935
2654.12	0.99286	2654.12	2654.12	2654.12	1.99336	2.99129	3.99352
2652.69	0.99283	2652.69	2652.69	2652.69	1.99341	2.99138	3.99357
2651.26	0.99281	2651.26	2651.26	2651.26	1.99344	2.99147	3.99363
2649.84	0.99281	2649.84	2649.84	2649.84	1.99345	2.99153	3.99368
2648.41	0.99284	2648.41	2648.41	2648.41	1.99342	2.99157	3.99374
2646.98	0.99286	2646.98	2646.98	2646.98	1.99338	2.99161	3.99381
2645.55	0.9929	2645.55	2645.55	2645.55	1.99334	2.99166	3.9939
2644.13	0.99292	2644.13	2644.13	2644.13	1.99333	2.99175	3.99402
2642.7	0.99294	2642.7	2642.7	2642.7	1.99335	2.99186	3.99414
2641.27	0.99296	2641.27	2641.27	2641.27	1.99339	2.992	3.99426
2639.84	0.993	2639.84	2639.84	2639.84	1.99343	2.99214	3.99438
2638.41	0.99306	2638.41	2638.41	2638.41	1.99348	2.99228	3.99451
2636.99	0.99314	2636.99	2636.99	2636.99	1.99355	2.99242	3.99464
2635.56	0.99322	2635.56	2635.56	2635.56	1.99364	2.99254	3.99477
2634.13	0.99331	2634.13	2634.13	2634.13	1.99376	2.99266	3.99489
2632.7	0.9934	2632.7	2632.7	2632.7	1.9939	2.99277	3.995
2631.28	0.99351	2631.28	2631.28	2631.28	1.99404	2.99288	3.99511
2629.85	0.99362	2629.85	2629.85	2629.85	1.99416	2.99297	3.99521
2628.42	0.99374	2628.42	2628.42	2628.42	1.99423	2.99305	3.99528
2626.99	0.99386	2626.99	2626.99	2626.99	1.99424	2.99313	3.99533
2625.56	0.99396	2625.56	2625.56	2625.56	1.99423	2.99319	3.99535
2624.14	0.99403	2624.14	2624.14	2624.14	1.9942	2.99326	3.99536
2622.71	0.99405	2622.71	2622.71	2622.71	1.99417	2.99334	3.99536
2621.28	0.99404	2621.28	2621.28	2621.28	1.99416	2.9934	3.99535
2619.85	0.99401	2619.85	2619.85	2619.85	1.99413	2.99345	3.99533
2618.43	0.99399	2618.43	2618.43	2618.43	1.99408	2.99346	3.99527
2617	0.99396	2617	2617	2617	1.99404	2.99344	3.99518
2615.57	0.99393	2615.57	2615.57	2615.57	1.99401	2.9934	3.99508
2614.14	0.99393	2614.14	2614.14	2614.14	1.99397	2.99334	3.99499
2612.72	0.99392	2612.72	2612.72	2612.72	1.99393	2.99327	3.9949
2611.29	0.99391	2611.29	2611.29	2611.29	1.9939	2.99321	3.99482
2609.86	0.99389	2609.86	2609.86	2609.86	1.99386	2.99315	3.99472
2608.43	0.99388	2608.43	2608.43	2608.43	1.99383	2.9931	3.99462
2607	0.99387	2607	2607	2607	1.99379	2.99306	3.99451
2605.58	0.99386	2605.58	2605.58	2605.58	1.99372	2.99301	3.9944
2604.15	0.99385	2604.15	2604.15	2604.15	1.99362	2.99297	3.99427
2602.72	0.99383	2602.72	2602.72	2602.72	1.99351	2.99294	3.99413
2601.29	0.99381	2601.29	2601.29	2601.29	1.99342	2.99292	3.99398
2599.87	0.99379	2599.87	2599.87	2599.87	1.99335	2.99289	3.99385
2598.44	0.99377	2598.44	2598.44	2598.44	1.99329	2.99286	3.99372
2597.01	0.99375	2597.01	2597.01	2597.01	1.99323	2.99281	3.99362
2595.58	0.99374	2595.58	2595.58	2595.58	1.99319	2.99277	3.99353
2594.16	0.99373	2594.16	2594.16	2594.16	1.99318	2.99273	3.99347
2592.73	0.99372	2592.73	2592.73	2592.73	1.99321	2.99269	3.99343
2591.3	0.99369	2591.3	2591.3	2591.3	1.99328	2.99266	3.99341
2589.87	0.99369	2589.87	2589.87	2589.87	1.99339	2.99263	3.99342
2588.44	0.99369	2588.44	2588.44	2588.44	1.99348	2.99261	3.99345
2587.02	0.99368	2587.02	2587.02	2587.02	1.99352	2.99257	3.99347
2585.59	0.99367	2585.59	2585.59	2585.59	1.99349	2.99252	3.99346
2584.16	0.99366	2584.16	2584.16	2584.16	1.99346	2.99247	3.99342
2582.73	0.99364	2582.73	2582.73	2582.73	1.9934	2.99242	3.99337
2581.31	0.99362	2581.31	2581.31	2581.31	1.99332	2.99238	3.99328
2579.88	0.9936	2579.88	2579.88	2579.88	1.99323	2.99235	3.9932
2578.45	0.99358	2578.45	2578.45	2578.45	1.99311	2.99234	3.99311
2577.02	0.99356	2577.02	2577.02	2577.02	1.99296	2.99232	3.993
2575.59	0.99354	2575.59	2575.59	2575.59	1.99279	2.99228	3.99287
2574.17	0.99353	2574.17	2574.17	2574.17	1.99264	2.99224	3.99274
2572.74	0.9935	2572.74	2572.74	2572.74	1.99255	2.99218	3.99262
2571.31	0.99345	2571.31	2571.31	2571.31	1.99253	2.99213	3.99253
2569.88	0.99343	2569.88	2569.88	2569.88	1.9926	2.99209	3.99245
2568.46	0.99343	2568.46	2568.46	2568.46	1.99272	2.99206	3.99237
2567.03	0.99342	2567.03	2567.03	2567.03	1.99284	2.99203	3.99229
2565.6	0.9934	2565.6	2565.6	2565.6	1.99292	2.99199	3.9922
2564.17	0.99337	2564.17	2564.17	2564.17	1.99292	2.99195	3.99212
2562.75	0.99335	2562.75	2562.75	2562.75	1.99288	2.99192	3.99203
2561.32	0.99332	2561.32	2561.32	2561.32	1.99284	2.99192	3.99194
2559.89	0.99328	2559.89	2559.89	2559.89	1.99279	2.99194	3.99185
2558.46	0.9932	2558.46	2558.46	2558.46	1.99274	2.99197	3.99177
2557.03	0.99309	2557.03	2557.03	2557.03	1.99263	2.99199	3.9917
2555.61	0.99298	2555.61	2555.61	2555.61	1.99245	2.99199	3.99162
2554.18	0.99286	2554.18	2554.18	2554.18	1.99222	2.99194	3.99152
2552.75	0.99274	2552.75	2552.75	2552.75	1.99199	2.99186	3.99141
2551.32	0.99262	2551.32	2551.32	2551.32	1.99184	2.99179	3.99132
2549.9	0.9925	2549.9	2549.9	2549.9	1.9918	2.99176	3.99127
2548.47	0.99239	2548.47	2548.47	2548.47	1.99188	2.99176	3.99127
2547.04	0.99233	2547.04	2547.04	2547.04	1.99205	2.9918	3.9913
2545.61	0.99233	2545.61	2545.61	2545.61	1.99223	2.99186	3.99134
2544.19	0.99239	2544.19	2544.19	2544.19	1.9924	2.99194	3.99138
2542.76	0.99251	2542.76	2542.76	2542.76	1.99253	2.99203	3.99144
2541.33	0.99266	2541.33	2541.33	2541.33	1.99266	2.99215	3.99153
2539.9	0.99284	2539.9	2539.9	2539.9	1.99278	2.9923	3.99167
2538.47	0.993	2538.47	2538.47	2538.47	1.9929	2.99247	3.99183
2537.05	0.99317	2537.05	2537.05	2537.05	1.993	2.99264	3.992
2535.62	0.99333	2535.62	2535.62	2535.62	1.99303	2.99279	3.99216
2534.19	0.9935	2534.19	2534.19	2534.19	1.99301	2.99291	3.99232
2532.76	0.99368	2532.76	2532.76	2532.76	1.99296	2.99302	3.99247
2531.34	0.99385	2531.34	2531.34	2531.34	1.99291	2.99311	3.99262
2529.91	0.994	2529.91	2529.91	2529.91	1.99292	2.99324	3.99277
2528.48	0.99413	2528.48	2528.48	2528.48	1.99302	2.99339	3.99293
2527.05	0.99425	2527.05	2527.05	2527.05	1.9932	2.99358	3.99309
2525.62	0.99438	2525.62	2525.62	2525.62	1.99343	2.99378	3.99327
2524.2	0.99454	2524.2	2524.2	2524.2	1.99364	2.99396	3.99343
2522.77	0.99471	2522.77	2522.77	2522.77	1.99379	2.99412	3.99357
2521.34	0.99488	2521.34	2521.34	2521.34	1.9939	2.99424	3.99368
2519.91	0.99502	2519.91	2519.91	2519.91	1.99397	2.99434	3.99379
2518.49	0.99513	2518.49	2518.49	2518.49	1.99403	2.99444	3.99389
2517.06	0.9952	2517.06	2517.06	2517.06	1.99406	2.99453	3.99401
2515.63	0.99523	2515.63	2515.63	2515.63	1.99404	2.9946	3.99412
2514.2	0.99524	2514.2	2514.2	2514.2	1.994	2.99464	3.99419
2512.78	0.99522	2512.78	2512.78	2512.78	1.9939	2.99465	3.9942
2511.35	0.9952	2511.35	2511.35	2511.35	1.99376	2.99464	3.99416
2509.92	0.99518	2509.92	2509.92	2509.92	1.99364	2.99462	3.99409
2508.49	0.99514	2508.49	2508.49	2508.49	1.99358	2.9946	3.99402
2507.06	0.99509	2507.06	2507.06	2507.06	1.9936	2.99459	3.99396
2505.64	0.99508	2505.64	2505.64	2505.64	1.99366	2.99457	3.99388
2504.21	0.99505	2504.21	2504.21	2504.21	1.99371	2.99455	3.99378
2502.78	0.99501	2502.78	2502.78	2502.78	1.99371	2.99449	3.99366
2501.35	0.99501	2501.35	2501.35	2501.35	1.99364	2.99441	3.99353
2499.93	0.99497	2499.93	2499.93	2499.93	1.99359	2.99432	3.99341
2498.5	0.9949	2498.5	2498.5	2498.5	1.99355	2.99423	3.99331
2497.07	0.99478	2497.07	2497.07	2497.07	1.99348	2.99416	3.99323
2495.64	0.99462	2495.64	2495.64	2495.64	1.99337	2.99409	3.99316
2494.22	0.99446	2494.22	2494.22	2494.22	1.99319	2.99401	3.9931
2492.79	0.99429	2492.79	2492.79	2492.79	1.99293	2.9939	3.99303
2491.36	0.99415	2491.36	2491.36	2491.36	1.99263	2.99377	3.99296
2489.93	0.99402	2489.93	2489.93	2489.93	1.99235	2.99362	3.99288
2488.5	0.99389	2488.5	2488.5	2488.5	1.99216	2.99349	3.99282
2487.08	0.99378	2487.08	2487.08	2487.08	1.99212	2.99339	3.99278
2485.65	0.99369	2485.65	2485.65	2485.65	1.99222	2.99333	3.99278
2484.22	0.99365	2484.22	2484.22	2484.22	1.99239	2.99331	3.99281
2482.79	0.99366	2482.79	2482.79	2482.79	1.99258	2.99331	3.99285
2481.37	0.99373	2481.37	2481.37	2481.37	1.99273	2.99332	3.99288
2479.94	0.99383	2479.94	2479.94	2479.94	1.99284	2.99333	3.99288
2478.51	0.99394	2478.51	2478.51	2478.51	1.99292	2.99336	3.99288
2477.08	0.99404	2477.08	2477.08	2477.08	1.99297	2.99339	3.99291
2475.66	0.99413	2475.66	2475.66	2475.66	1.99297	2.99343	3.99295
2474.23	0.99419	2474.23	2474.23	2474.23	1.99288	2.99345	3.99298
2472.8	0.99426	2472.8	2472.8	2472.8	1.99268	2.99343	3.99298
2471.37	0.99433	2471.37	2471.37	2471.37	1.99237	2.99336	3.99292
2469.94	0.99439	2469.94	2469.94	2469.94	1.99201	2.99327	3.99285
2468.52	0.99444	2468.52	2468.52	2468.52	1.9917	2.99317	3.99278
2467.09	0.99444	2467.09	2467.09	2467.09	1.99149	2.9931	3.99272
2465.66	0.99442	2465.66	2465.66	2465.66	1.99143	2.99306	3.99267
2464.23	0.9944	2464.23	2464.23	2464.23	1.99149	2.99305	3.99263
2462.81	0.99437	2462.81	2462.81	2462.81	1.99162	2.99304	3.99257
2461.38	0.99434	2461.38	2461.38	2461.38	1.99177	2.99302	3.99251
2459.95	0.9943	2459.95	2459.95	2459.95	1.99191	2.99299	3.99244
2458.52	0.99427	2458.52	2458.52	2458.52	1.99207	2.99295	3.99239
2457.09	0.99424	2457.09	2457.09	2457.09	1.99223	2.99291	3.99233
2455.67	0.99421	2455.67	2455.67	2455.67	1.99236	2.99287	3.99228
2454.24	0.99417	2454.24	2454.24	2454.24	1.99239	2.99284	3.99224
2452.81	0.99413	2452.81	2452.81	2452.81	1.99233	2.99281	3.9922
2451.38	0.99409	2451.38	2451.38	2451.38	1.99223	2.99276	3.99215
2449.96	0.99405	2449.96	2449.96	2449.96	1.992	2.99269	3.99208
2448.53	0.99402	2448.53	2448.53	2448.53	1.9917	2.99264	3.99199
2447.1	0.99398	2447.1	2447.1	2447.1	1.99141	2.99261	3.99191
2445.67	0.99393	2445.67	2445.67	2445.67	1.99122	2.99261	3.99186
2444.25	0.99389	2444.25	2444.25	2444.25	1.99114	2.99263	3.99185
2442.82	0.99386	2442.82	2442.82	2442.82	1.99116	2.99264	3.99187
2441.39	0.99388	2441.39	2441.39	2441.39	1.99124	2.99263	3.99191
2439.96	0.99392	2439.96	2439.96	2439.96	1.99138	2.99259	3.99194
2438.53	0.99407	2438.53	2438.53	2438.53	1.99158	2.99255	3.99198
2437.11	0.99422	2437.11	2437.11	2437.11	1.99187	2.99255	3.99206
2435.68	0.99435	2435.68	2435.68	2435.68	1.99221	2.99258	3.99217
2434.25	0.99445	2434.25	2434.25	2434.25	1.99255	2.99266	3.99232
2432.82	0.99452	2432.82	2432.82	2432.82	1.99281	2.99275	3.99246
2431.4	0.99459	2431.4	2431.4	2431.4	1.99292	2.99286	3.99257
2429.97	0.99465	2429.97	2429.97	2429.97	1.99288	2.99295	3.99265
2428.54	0.9947	2428.54	2428.54	2428.54	1.99276	2.99303	3.99271
2427.11	0.99471	2427.11	2427.11	2427.11	1.99255	2.99309	3.99275
2425.69	0.99468	2425.69	2425.69	2425.69	1.99231	2.99314	3.99278
2424.26	0.99466	2424.26	2424.26	2424.26	1.9921	2.99319	3.99279
2422.83	0.99462	2422.83	2422.83	2422.83	1.99193	2.99321	3.99279
2421.4	0.99459	2421.4	2421.4	2421.4	1.9918	2.99321	3.99278
2419.97	0.99457	2419.97	2419.97	2419.97	1.99171	2.99317	3.99276
2418.55	0.99456	2418.55	2418.55	2418.55	1.99168	2.99311	3.99273
2417.12	0.99455	2417.12	2417.12	2417.12	1.99173	2.99305	3.99269
2415.69	0.99452	2415.69	2415.69	2415.69	1.99187	2.99302	3.99264
2414.26	0.99449	2414.26	2414.26	2414.26	1.99211	2.99303	3.99261
2412.84	0.99446	2412.84	2412.84	2412.84	1.99238	2.99305	3.99261
2411.41	0.9944	2411.41	2411.41	2411.41	1.9926	2.99305	3.99262
2409.98	0.99435	2409.98	2409.98	2409.98	1.99271	2.99301	3.99263
2408.55	0.99429	2408.55	2408.55	2408.55	1.9927	2.99293	3.99262
2407.12	0.99423	2407.12	2407.12	2407.12	1.99259	2.99282	3.99258
2405.7	0.99414	2405.7	2405.7	2405.7	1.99241	2.9927	3.99255
2404.27	0.99403	2404.27	2404.27	2404.27	1.99223	2.9926	3.99251
2402.84	0.99392	2402.84	2402.84	2402.84	1.99206	2.99252	3.99249
2401.41	0.99383	2401.41	2401.41	2401.41	1.99189	2.99245	3.99245
2399.99	0.99379	2399.99	2399.99	2399.99	1.99172	2.99241	3.9924
2398.56	0.99379	2398.56	2398.56	2398.56	1.99159	2.9924	3.99235
2397.13	0.99385	2397.13	2397.13	2397.13	1.99155	2.99244	3.99231
2395.7	0.99394	2395.7	2395.7	2395.7	1.99163	2.99255	3.99234
2394.28	0.99403	2394.28	2394.28	2394.28	1.99185	2.99272	3.99244
2392.85	0.99408	2392.85	2392.85	2392.85	1.99217	2.99291	3.99259
2391.42	0.99404	2391.42	2391.42	2391.42	1.99246	2.99303	3.9927
2389.99	0.99403	2389.99	2389.99	2389.99	1.99257	2.99298	3.99269
2388.56	0.99393	2388.56	2388.56	2388.56	1.99257	2.99266	3.99248
2387.14	0.99356	2387.14	2387.14	2387.14	1.9922	2.99197	3.99199
2385.71	0.99282	2385.71	2385.71	2385.71	1.99131	2.99087	3.99116
2384.28	0.99165	2384.28	2384.28	2384.28	1.98992	2.98933	3.98993
2382.85	0.99002	2382.85	2382.85	2382.85	1.98802	2.98735	3.98828
2381.43	0.98793	2381.43	2381.43	2381.43	1.98563	2.98493	3.98624
2380	0.98541	2380	2380	2380	1.98279	2.98207	3.98384
2378.57	0.98251	2378.57	2378.57	2378.57	1.97957	2.97881	3.98114
2377.14	0.97926	2377.14	2377.14	2377.14	1.97611	2.97521	3.9782
2375.72	0.97575	2375.72	2375.72	2375.72	1.97256	2.97135	3.97509
2374.29	0.97204	2374.29	2374.29	2374.29	1.96912	2.96738	3.9719
2372.86	0.96818	2372.86	2372.86	2372.86	1.96592	2.9634	3.96877
2371.43	0.96425	2371.43	2371.43	2371.43	1.96301	2.95952	3.96578
2370	0.96031	2370	2370	2370	1.9604	2.95582	3.96295
2368.58	0.95647	2368.58	2368.58	2368.58	1.95806	2.95234	3.96031
2367.15	0.95285	2367.15	2367.15	2367.15	1.95599	2.94917	3.95789
2365.72	0.94963	2365.72	2365.72	2365.72	1.95423	2.94641	3.95576
2364.29	0.94696	2364.29	2364.29	2364.29	1.95286	2.94417	3.95405
2362.87	0.94499	2362.87	2362.87	2362.87	1.95198	2.94262	3.9529
2361.44	0.94382	2361.44	2361.44	2361.44	1.95177	2.94198	3.95251
2360.01	0.94353	2360.01	2360.01	2360.01	1.95234	2.94244	3.95301
2358.58	0.94411	2358.58	2358.58	2358.58	1.95368	2.94404	3.95442
2357.15	0.94551	2357.15	2357.15	2357.15	1.95562	2.94658	3.95659
2355.73	0.94758	2355.73	2355.73	2355.73	1.95786	2.94965	3.95919
2354.3	0.95013	2354.3	2354.3	2354.3	1.96011	2.9528	3.96183
2352.87	0.95295	2352.87	2352.87	2352.87	1.96221	2.9557	3.96425
2351.44	0.95578	2351.44	2351.44	2351.44	1.96405	2.95816	3.96627
2350.02	0.95837	2350.02	2350.02	2350.02	1.96556	2.96005	3.96777
2348.59	0.96047	2348.59	2348.59	2348.59	1.96665	2.96127	3.96871
2347.16	0.9619	2347.16	2347.16	2347.16	1.96729	2.9618	3.96909
2345.73	0.96261	2345.73	2345.73	2345.73	1.9675	2.96167	3.96896
2344.31	0.96269	2344.31	2344.31	2344.31	1.96737	2.96101	3.96841
2342.88	0.96229	2342.88	2342.88	2342.88	1.96698	2.95997	3.96757
2341.45	0.96162	2341.45	2341.45	2341.45	1.96644	2.95873	3.9666
2340.02	0.96083	2340.02	2340.02	2340.02	1.96589	2.95756	3.96575
2338.59	0.96005	2338.59	2338.59	2338.59	1.96551	2.95679	3.96527
2337.17	0.95938	2337.17	2337.17	2337.17	1.96541	2.95665	3.9653
2335.74	0.95891	2335.74	2335.74	2335.74	1.96558	2.95712	3.96579
2334.31	0.95866	2334.31	2334.31	2334.31	1.96585	2.95799	3.96651
2332.88	0.95868	2332.88	2332.88	2332.88	1.96605	2.95894	3.96725
2331.46	0.95897	2331.46	2331.46	2331.46	1.96612	2.9598	3.9679
2330.03	0.95953	2330.03	2330.03	2330.03	1.96617	2.96059	3.9685
2328.6	0.96031	2328.6	2328.6	2328.6	1.96635	2.96139	3.96912
2327.17	0.96124	2327.17	2327.17	2327.17	1.96681	2.96229	3.96983
2325.75	0.96226	2325.75	2325.75	2325.75	1.96762	2.96334	3.97067
2324.32	0.96333	2324.32	2324.32	2324.32	1.96882	2.96458	3.97169
2322.89	0.96449	2322.89	2322.89	2322.89	1.97032	2.96599	3.97288
2321.46	0.96579	2321.46	2321.46	2321.46	1.97202	2.96751	3.97416
2320.03	0.96727	2320.03	2320.03	2320.03	1.97373	2.96909	3.97546
2318.61	0.96894	2318.61	2318.61	2318.61	1.97535	2.97068	3.9767
2317.18	0.97073	2317.18	2317.18	2317.18	1.97682	2.97229	3.97793
2315.75	0.9726	2315.75	2315.75	2315.75	1.97817	2.97397	3.9792
2314.32	0.97448	2314.32	2314.32	2314.32	1.97943	2.97572	3.98054
2312.9	0.97634	2312.9	2312.9	2312.9	1.98059	2.97749	3.98189
2311.47	0.97814	2311.47	2311.47	2311.47	1.98162	2.97917	3.98319
2310.04	0.9799	2310.04	2310.04	2310.04	1.98247	2.98069	3.98436
2308.61	0.9816	2308.61	2308.61	2308.61	1.98319	2.98203	3.98542
2307.18	0.98322	2307.18	2307.18	2307.18	1.98386	2.98323	3.98641
2305.76	0.98473	2305.76	2305.76	2305.76	1.98461	2.98435	3.98738
2304.33	0.9861	2304.33	2304.33	2304.33	1.98554	2.98544	3.98832
2302.9	0.98732	2302.9	2302.9	2302.9	1.98666	2.98652	3.98921
2301.47	0.9884	2301.47	2301.47	2301.47	1.98791	2.98755	3.99001
2300.05	0.98937	2300.05	2300.05	2300.05	1.98915	2.9885	3.99069
2298.62	0.99026	2298.62	2298.62	2298.62	1.99029	2.98934	3.99125
2297.19	0.99108	2297.19	2297.19	2297.19	1.99126	2.99006	3.99171
2295.76	0.99183	2295.76	2295.76	2295.76	1.99203	2.99067	3.99206
2294.34	0.99249	2294.34	2294.34	2294.34	1.99261	2.99118	3.99232
2292.91	0.99304	2292.91	2292.91	2292.91	1.99302	2.99162	3.99256
2291.48	0.99349	2291.48	2291.48	2291.48	1.99324	2.99197	3.99277
2290.05	0.99383	2290.05	2290.05	2290.05	1.99327	2.99224	3.99296
2288.62	0.99409	2288.62	2288.62	2288.62	1.99326	2.99241	3.99311
2287.2	0.99427	2287.2	2287.2	2287.2	1.99311	2.9925	3.99317
2285.77	0.99438	2285.77	2285.77	2285.77	1.99283	2.99252	3.99315
2284.34	0.99439	2284.34	2284.34	2284.34	1.99251	2.99251	3.99308
2282.91	0.99438	2282.91	2282.91	2282.91	1.99228	2.9925	3.99301
2281.49	0.99436	2281.49	2281.49	2281.49	1.99218	2.99251	3.99295
2280.06	0.99435	2280.06	2280.06	2280.06	1.99223	2.99252	3.99288
2278.63	0.99431	2278.63	2278.63	2278.63	1.99238	2.99251	3.99279
2277.2	0.99427	2277.2	2277.2	2277.2	1.99258	2.99245	3.99268
2275.78	0.99425	2275.78	2275.78	2275.78	1.99276	2.99233	3.99256
2274.35	0.99424	2274.35	2274.35	2274.35	1.9929	2.99217	3.99246
2272.92	0.99424	2272.92	2272.92	2272.92	1.99301	2.99201	3.9924
2271.49	0.99423	2271.49	2271.49	2271.49	1.99307	2.99189	3.99237
2270.06	0.99422	2270.06	2270.06	2270.06	1.99306	2.99183	3.99235
2268.64	0.9942	2268.64	2268.64	2268.64	1.99302	2.9918	3.99234
2267.21	0.99419	2267.21	2267.21	2267.21	1.9928	2.9918	3.99232
2265.78	0.9942	2265.78	2265.78	2265.78	1.99242	2.99181	3.99232
2264.35	0.9942	2264.35	2264.35	2264.35	1.99193	2.99183	3.99229
2262.93	0.99421	2262.93	2262.93	2262.93	1.99145	2.99187	3.99225
2261.5	0.9942	2261.5	2261.5	2261.5	1.9911	2.99194	3.9922
2260.07	0.9942	2260.07	2260.07	2260.07	1.99093	2.99203	3.99218
2258.64	0.99418	2258.64	2258.64	2258.64	1.99095	2.99211	3.99219
2257.21	0.99416	2257.21	2257.21	2257.21	1.99112	2.99216	3.99222
2255.79	0.99415	2255.79	2255.79	2255.79	1.99136	2.99216	3.99222
2254.36	0.99415	2254.36	2254.36	2254.36	1.99165	2.99211	3.99218
2252.93	0.99416	2252.93	2252.93	2252.93	1.99198	2.99205	3.9921
2251.5	0.99415	2251.5	2251.5	2251.5	1.99233	2.99201	3.99205
2250.08	0.99415	2250.08	2250.08	2250.08	1.9927	2.99203	3.99203
2248.65	0.99414	2248.65	2248.65	2248.65	1.99302	2.99208	3.99204
2247.22	0.99414	2247.22	2247.22	2247.22	1.99301	2.99207	3.99204
2245.79	0.99414	2245.79	2245.79	2245.79	1.993	2.99205	3.99204
2244.37	0.99413	2244.37	2244.37	2244.37	1.99298	2.99204	3.99205
2242.94	0.99412	2242.94	2242.94	2242.94	1.99299	2.99202	3.99205
2241.51	0.99411	2241.51	2241.51	2241.51	1.99298	2.99201	3.99206
2240.08	0.99411	2240.08	2240.08	2240.08	1.99298	2.99199	3.99206
2238.65	0.9941	2238.65	2238.65	2238.65	1.99297	2.99198	3.99206
2237.23	0.99409	2237.23	2237.23	2237.23	1.99296	2.99196	3.99207
2235.8	0.99408	2235.8	2235.8	2235.8	1.99295	2.99195	3.99207
2234.37	0.99407	2234.37	2234.37	2234.37	1.99295	2.99193	3.99207
2232.94	0.99408	2232.94	2232.94	2232.94	1.99295	2.99192	3.99208
2231.52	0.99407	2231.52	2231.52	2231.52	1.99294	2.9919	3.99208
2230.09	0.99406	2230.09	2230.09	2230.09	1.99292	2.99189	3.99209
2228.66	0.99406	2228.66	2228.66	2228.66	1.99292	2.99187	3.99209
2227.23	0.99405	2227.23	2227.23	2227.23	1.99291	2.99186	3.99209
2225.81	0.99403	2225.81	2225.81	2225.81	1.99291	2.99184	3.9921
2224.38	0.99403	2224.38	2224.38	2224.38	1.99289	2.99182	3.9921
2222.95	0.99403	2222.95	2222.95	2222.95	1.9929	2.99181	3.9921
2221.52	0.99403	2221.52	2221.52	2221.52	1.9929	2.99179	3.99211
2220.09	0.99402	2220.09	2220.09	2220.09	1.99289	2.99178	3.99211
2218.67	0.994	2218.67	2218.67	2218.67	1.99288	2.99176	3.99211
2217.24	0.99401	2217.24	2217.24	2217.24	1.99288	2.99175	3.99212
2215.81	0.99401	2215.81	2215.81	2215.81	1.99287	2.99173	3.99212
2214.38	0.994	2214.38	2214.38	2214.38	1.99288	2.99172	3.99213
2212.96	0.99401	2212.96	2212.96	2212.96	1.99288	2.9917	3.99213
2211.53	0.99401	2211.53	2211.53	2211.53	1.99287	2.99169	3.99213
2210.1	0.994	2210.1	2210.1	2210.1	1.99287	2.99167	3.99214
2208.67	0.994	2208.67	2208.67	2208.67	1.99287	2.99166	3.99214
2207.24	0.994	2207.24	2207.24	2207.24	1.99286	2.99164	3.99215
2205.82	0.994	2205.82	2205.82	2205.82	1.99285	2.99163	3.99215
2204.39	0.994	2204.39	2204.39	2204.39	1.99286	2.99161	3.99215
2202.96	0.994	2202.96	2202.96	2202.96	1.99285	2.9916	3.99216
2201.53	0.994	2201.53	2201.53	2201.53	1.99285	2.99158	3.99216
2200.11	0.994	2200.11	2200.11	2200.11	1.99285	2.99157	3.99216
2198.68	0.994	2198.68	2198.68	2198.68	1.99284	2.99155	3.99217
2197.25	0.99401	2197.25	2197.25	2197.25	1.99285	2.99154	3.99217
2195.82	0.99401	2195.82	2195.82	2195.82	1.99285	2.99152	3.99218
2194.4	0.99401	2194.4	2194.4	2194.4	1.99285	2.99151	3.99218
2192.97	0.994	2192.97	2192.97	2192.97	1.99285	2.99149	3.99218
2191.54	0.99401	2191.54	2191.54	2191.54	1.99285	2.99148	3.99219
2190.11	0.994	2190.11	2190.11	2190.11	1.99286	2.99146	3.99219
2188.68	0.99401	2188.68	2188.68	2188.68	1.99286	2.99144	3.99219
2187.26	0.99401	2187.26	2187.26	2187.26	1.99286	2.99143	3.9922
2185.83	0.99401	2185.83	2185.83	2185.83	1.99286	2.99141	3.9922
2184.4	0.99402	2184.4	2184.4	2184.4	1.99287	2.9914	3.99221
2182.97	0.99402	2182.97	2182.97	2182.97	1.99287	2.99138	3.99221
2181.55	0.99402	2181.55	2181.55	2181.55	1.99287	2.99137	3.99221
2180.12	0.99403	2180.12	2180.12	2180.12	1.99288	2.99135	3.99222
2178.69	0.99403	2178.69	2178.69	2178.69	1.99288	2.99134	3.99222
2177.26	0.99403	2177.26	2177.26	2177.26	1.99287	2.99132	3.99222
2175.84	0.99402	2175.84	2175.84	2175.84	1.99286	2.99131	3.99223
2174.41	0.99402	2174.41	2174.41	2174.41	1.99284	2.99129	3.99223
2172.98	0.99402	2172.98	2172.98	2172.98	1.99285	2.99128	3.99224
2171.55	0.99403	2171.55	2171.55	2171.55	1.99285	2.99126	3.99224
2170.12	0.99402	2170.12	2170.12	2170.12	1.99285	2.99125	3.99224
2168.7	0.99402	2168.7	2168.7	2168.7	1.99285	2.99123	3.99225
2167.27	0.99402	2167.27	2167.27	2167.27	1.99285	2.99122	3.99225
2165.84	0.99402	2165.84	2165.84	2165.84	1.99284	2.9912	3.99226
2164.41	0.99401	2164.41	2164.41	2164.41	1.99284	2.99119	3.99226
2162.99	0.994	2162.99	2162.99	2162.99	1.99285	2.99117	3.99226
2161.56	0.99401	2161.56	2161.56	2161.56	1.99285	2.99116	3.99227
2160.13	0.994	2160.13	2160.13	2160.13	1.99285	2.99114	3.99227
2158.7	0.99401	2158.7	2158.7	2158.7	1.99285	2.99113	3.99227
2157.27	0.99401	2157.27	2157.27	2157.27	1.99287	2.99111	3.99228
2155.85	0.994	2155.85	2155.85	2155.85	1.99288	2.9911	3.99228
2154.42	0.994	2154.42	2154.42	2154.42	1.99288	2.99108	3.99228
2152.99	0.994	2152.99	2152.99	2152.99	1.99288	2.99107	3.99229
2151.56	0.99401	2151.56	2151.56	2151.56	1.99288	2.99105	3.99229
2150.14	0.99401	2150.14	2150.14	2150.14	1.99288	2.99103	3.9923
2148.71	0.994	2148.71	2148.71	2148.71	1.99288	2.99102	3.9923
2147.28	0.99401	2147.28	2147.28	2147.28	1.99289	2.991	3.9923
2145.85	0.99402	2145.85	2145.85	2145.85	1.99288	2.99099	3.99231
2144.43	0.99402	2144.43	2144.43	2144.43	1.99288	2.99097	3.99231
2143	0.99403	2143	2143	2143	1.99289	2.99096	3.99231
2141.57	0.99404	2141.57	2141.57	2141.57	1.99289	2.99094	3.99232
2140.14	0.99405	2140.14	2140.14	2140.14	1.99289	2.99093	3.99232
2138.71	0.99406	2138.71	2138.71	2138.71	1.99289	2.99091	3.99233
2137.29	0.99407	2137.29	2137.29	2137.29	1.9929	2.9909	3.99233
2135.86	0.99407	2135.86	2135.86	2135.86	1.9929	2.99088	3.99233
2134.43	0.99406	2134.43	2134.43	2134.43	1.9929	2.99087	3.99234
2133	0.99408	2133	2133	2133	1.99291	2.99085	3.99234
2131.58	0.99409	2131.58	2131.58	2131.58	1.99291	2.99084	3.99234
2130.15	0.99409	2130.15	2130.15	2130.15	1.99291	2.99082	3.99235
2128.72	0.99411	2128.72	2128.72	2128.72	1.9929	2.99081	3.99235
2127.29	0.99412	2127.29	2127.29	2127.29	1.9929	2.99079	3.99236
2125.87	0.99412	2125.87	2125.87	2125.87	1.9929	2.99078	3.99236
2124.44	0.99412	2124.44	2124.44	2124.44	1.99289	2.99076	3.99236
2123.01	0.99411	2123.01	2123.01	2123.01	1.99287	2.99075	3.99237
2121.58	0.99412	2121.58	2121.58	2121.58	1.99288	2.99073	3.99237
2120.15	0.99412	2120.15	2120.15	2120.15	1.99288	2.99072	3.99237
2118.73	0.99412	2118.73	2118.73	2118.73	1.99287	2.9907	3.99238
2117.3	0.99413	2117.3	2117.3	2117.3	1.99286	2.99069	3.99238
2115.87	0.99414	2115.87	2115.87	2115.87	1.99286	2.99067	3.99239
2114.44	0.99415	2114.44	2114.44	2114.44	1.99286	2.99066	3.99239
2113.02	0.99415	2113.02	2113.02	2113.02	1.99286	2.99064	3.99239
2111.59	0.99415	2111.59	2111.59	2111.59	1.99287	2.99062	3.9924
2110.16	0.99415	2110.16	2110.16	2110.16	1.99286	2.99061	3.9924
2108.73	0.99414	2108.73	2108.73	2108.73	1.99287	2.99059	3.99241
2107.3	0.99414	2107.3	2107.3	2107.3	1.99287	2.99058	3.99241
2105.88	0.99415	2105.88	2105.88	2105.88	1.99289	2.99056	3.99241
2104.45	0.99414	2104.45	2104.45	2104.45	1.99291	2.99055	3.99242
2103.02	0.99415	2103.02	2103.02	2103.02	1.99292	2.99053	3.99242
2101.59	0.99416	2101.59	2101.59	2101.59	1.99294	2.99052	3.99242
2100.17	0.99416	2100.17	2100.17	2100.17	1.99296	2.9905	3.99243
2098.74	0.99418	2098.74	2098.74	2098.74	1.99297	2.99049	3.99243
2097.31	0.9942	2097.31	2097.31	2097.31	1.99297	2.99047	3.99243
2095.88	0.99421	2095.88	2095.88	2095.88	1.99297	2.99046	3.99244
2094.46	0.99422	2094.46	2094.46	2094.46	1.99296	2.99044	3.99244
2093.03	0.99421	2093.03	2093.03	2093.03	1.99294	2.99043	3.99245
2091.6	0.99421	2091.6	2091.6	2091.6	1.99292	2.99041	3.99245
2090.17	0.99419	2090.17	2090.17	2090.17	1.99289	2.9904	3.99245
2088.74	0.99417	2088.74	2088.74	2088.74	1.99285	2.99038	3.99246
2087.32	0.99414	2087.32	2087.32	2087.32	1.99281	2.99037	3.99246
2085.89	0.99412	2085.89	2085.89	2085.89	1.99276	2.99035	3.99247
2084.46	0.99408	2084.46	2084.46	2084.46	1.99271	2.99034	3.99247
2083.03	0.99403	2083.03	2083.03	2083.03	1.99265	2.99032	3.99247
2081.61	0.99398	2081.61	2081.61	2081.61	1.99258	2.99031	3.99248
2080.18	0.99393	2080.18	2080.18	2080.18	1.99251	2.99029	3.99248
2078.75	0.99387	2078.75	2078.75	2078.75	1.99243	2.99028	3.99248
2077.32	0.9939	2077.32	2077.32	2077.32	1.99246	2.99026	3.99249
2075.9	0.99392	2075.9	2075.9	2075.9	1.99247	2.99024	3.99249
2074.47	0.99394	2074.47	2074.47	2074.47	1.99249	2.99023	3.9925
2073.04	0.99396	2073.04	2073.04	2073.04	1.9925	2.99021	3.9925
2071.61	0.99399	2071.61	2071.61	2071.61	1.99251	2.9902	3.9925
2070.18	0.99401	2070.18	2070.18	2070.18	1.99252	2.99018	3.99251
2068.76	0.99403	2068.76	2068.76	2068.76	1.99253	2.99017	3.99251
2067.33	0.99404	2067.33	2067.33	2067.33	1.99255	2.99015	3.99251
2065.9	0.99406	2065.9	2065.9	2065.9	1.99255	2.99014	3.99252
2064.47	0.99407	2064.47	2064.47	2064.47	1.99256	2.99012	3.99252
2063.05	0.99411	2063.05	2063.05	2063.05	1.99258	2.99011	3.99253
2061.62	0.99414	2061.62	2061.62	2061.62	1.99259	2.99009	3.99253
2060.19	0.99417	2060.19	2060.19	2060.19	1.9926	2.99008	3.99253
2058.76	0.9942	2058.76	2058.76	2058.76	1.9926	2.99006	3.99254
2057.34	0.99423	2057.34	2057.34	2057.34	1.9926	2.99005	3.99254
2055.91	0.99425	2055.91	2055.91	2055.91	1.99259	2.99003	3.99254
2054.48	0.99427	2054.48	2054.48	2054.48	1.99257	2.99002	3.99255
2053.05	0.99429	2053.05	2053.05	2053.05	1.99259	2.99	3.99255
2051.62	0.99431	2051.62	2051.62	2051.62	1.9926	2.98999	3.99256
2050.2	0.99433	2050.2	2050.2	2050.2	1.9926	2.98997	3.99256
2048.77	0.99433	2048.77	2048.77	2048.77	1.9926	2.98996	3.99256
2047.34	0.99436	2047.34	2047.34	2047.34	1.99259	2.98994	3.99257
2045.91	0.99438	2045.91	2045.91	2045.91	1.99259	2.98993	3.99257
2044.49	0.9944	2044.49	2044.49	2044.49	1.99258	2.98991	3.99257
2043.06	0.99441	2043.06	2043.06	2043.06	1.9926	2.9899	3.99258
2041.63	0.99442	2041.63	2041.63	2041.63	1.99261	2.98988	3.99258
2040.2	0.99443	2040.2	2040.2	2040.2	1.99262	2.98986	3.99259
2038.77	0.99444	2038.77	2038.77	2038.77	1.99262	2.98985	3.99259
2037.35	0.99444	2037.35	2037.35	2037.35	1.99265	2.98983	3.99259
2035.92	0.99447	2035.92	2035.92	2035.92	1.99268	2.98982	3.9926
2034.49	0.99448	2034.49	2034.49	2034.49	1.9927	2.9898	3.9926
2033.06	0.99449	2033.06	2033.06	2033.06	1.99271	2.98979	3.9926
2031.64	0.99452	2031.64	2031.64	2031.64	1.99272	2.98977	3.99261
2030.21	0.99454	2030.21	2030.21	2030.21	1.99272	2.98976	3.99261
2028.78	0.99455	2028.78	2028.78	2028.78	1.99271	2.98974	3.99262
2027.35	0.99458	2027.35	2027.35	2027.35	1.99272	2.98973	3.99262
2025.93	0.9946	2025.93	2025.93	2025.93	1.99272	2.98971	3.99262
2024.5	0.99461	2024.5	2024.5	2024.5	1.99272	2.9897	3.99263
2023.07	0.99464	2023.07	2023.07	2023.07	1.99272	2.98968	3.99263
2021.64	0.99468	2021.64	2021.64	2021.64	1.99273	2.98967	3.99263
2020.21	0.99471	2020.21	2020.21	2020.21	1.99273	2.98965	3.99264
2018.79	0.99474	2018.79	2018.79	2018.79	1.99275	2.98964	3.99264
2017.36	0.99477	2017.36	2017.36	2017.36	1.99276	2.98962	3.99265
2015.93	0.9948	2015.93	2015.93	2015.93	1.99277	2.98961	3.99265
2014.5	0.99483	2014.5	2014.5	2014.5	1.99279	2.98959	3.99265
2013.08	0.99485	2013.08	2013.08	2013.08	1.99279	2.98958	3.99266
2011.65	0.99488	2011.65	2011.65	2011.65	1.99279	2.98956	3.99266
2010.22	0.99489	2010.22	2010.22	2010.22	1.99278	2.98955	3.99266
2008.79	0.99493	2008.79	2008.79	2008.79	1.99279	2.98953	3.99267
2007.37	0.99496	2007.37	2007.37	2007.37	1.9928	2.98951	3.99267
2005.94	0.99498	2005.94	2005.94	2005.94	1.9928	2.9895	3.99268
2004.51	0.995	2004.51	2004.51	2004.51	1.99283	2.98948	3.99268
2003.08	0.99503	2003.08	2003.08	2003.08	1.99285	2.98947	3.99268
2001.65	0.99506	2001.65	2001.65	2001.65	1.99287	2.98945	3.99269
2000.23	0.99509	2000.23	2000.23	2000.23	1.99288	2.98944	3.99269
1998.8	0.99512	1998.8	1998.8	1998.8	1.99291	2.98942	3.99269
1997.37	0.99515	1997.37	1997.37	1997.37	1.99294	2.98941	3.9927
1995.94	0.99517	1995.94	1995.94	1995.94	1.99295	2.98939	3.9927
1994.52	0.99518	1994.52	1994.52	1994.52	1.99298	2.98938	3.99271
1993.09	0.99518	1993.09	1993.09	1993.09	1.99301	2.98936	3.99271
1991.66	0.9952	1991.66	1991.66	1991.66	1.99303	2.98935	3.99271
1990.23	0.9952	1990.23	1990.23	1990.23	1.99304	2.98933	3.99272
1988.8	0.99521	1988.8	1988.8	1988.8	1.99304	2.98932	3.99272
1987.38	0.9952	1987.38	1987.38	1987.38	1.99304	2.9893	3.99273
1985.95	0.9952	1985.95	1985.95	1985.95	1.99304	2.98929	3.99273
1984.52	0.99518	1984.52	1984.52	1984.52	1.99302	2.98927	3.99273
1983.09	0.99516	1983.09	1983.09	1983.09	1.993	2.98926	3.99274
1981.67	0.99513	1981.67	1981.67	1981.67	1.99298	2.98924	3.99274
1980.24	0.9951	1980.24	1980.24	1980.24	1.99295	2.98923	3.99274
1978.81	0.99506	1978.81	1978.81	1978.81	1.9929	2.98921	3.99275
1977.38	0.99502	1977.38	1977.38	1977.38	1.99286	2.9892	3.99275
1975.96	0.99496	1975.96	1975.96	1975.96	1.99281	2.98918	3.99275
1974.53	0.99491	1974.53	1974.53	1974.53	1.99275	2.98917	3.99276
1973.1	0.99485	1973.1	1973.1	1973.1	1.99268	2.98915	3.99276
1971.67	0.99478	1971.67	1971.67	1971.67	1.99261	2.98913	3.99277
1970.24	0.99471	1970.24	1970.24	1970.24	1.99253	2.98912	3.99277
1968.82	0.99462	1968.82	1968.82	1968.82	1.99245	2.9891	3.99277
1967.39	0.99454	1967.39	1967.39	1967.39	1.99236	2.98909	3.99278
1965.96	0.99444	1965.96	1965.96	1965.96	1.99226	2.98907	3.99278
1964.53	0.99435	1964.53	1964.53	1964.53	1.99216	2.98906	3.99279
1963.11	0.99424	1963.11	1963.11	1963.11	1.99205	2.98904	3.99279
1961.68	0.99413	1961.68	1961.68	1961.68	1.99193	2.98903	3.99279
1960.25	0.99401	1960.25	1960.25	1960.25	1.99181	2.98901	3.9928
1958.82	0.99389	1958.82	1958.82	1958.82	1.99168	2.989	3.9928
1957.4	0.99391	1957.4	1957.4	1957.4	1.99174	2.98898	3.9928
1955.97	0.99392	1955.97	1955.97	1955.97	1.99178	2.98897	3.99281
1954.54	0.99396	1954.54	1954.54	1954.54	1.99183	2.98895	3.99281
1953.11	0.994	1953.11	1953.11	1953.11	1.99186	2.98894	3.99281
1951.68	0.99403	1951.68	1951.68	1951.68	1.99189	2.98892	3.99282
1950.26	0.99406	1950.26	1950.26	1950.26	1.99191	2.98891	3.99282
1948.83	0.9941	1948.83	1948.83	1948.83	1.99193	2.98889	3.99283
1947.4	0.99414	1947.4	1947.4	1947.4	1.99196	2.98888	3.99283
1945.97	0.99418	1945.97	1945.97	1945.97	1.99198	2.98886	3.99283
1944.55	0.99422	1944.55	1944.55	1944.55	1.992	2.98885	3.99284
1943.12	0.99427	1943.12	1943.12	1943.12	1.99201	2.98883	3.99284
1941.69	0.99431	1941.69	1941.69	1941.69	1.99201	2.98882	3.99285
1940.26	0.99435	1940.26	1940.26	1940.26	1.99201	2.9888	3.99285
1938.83	0.99438	1938.83	1938.83	1938.83	1.99206	2.98878	3.99285
1937.41	0.9944	1937.41	1937.41	1937.41	1.99211	2.98877	3.99286
1935.98	0.99442	1935.98	1935.98	1935.98	1.99215	2.98875	3.99286
1934.55	0.99443	1934.55	1934.55	1934.55	1.99218	2.98874	3.99286
1933.12	0.99444	1933.12	1933.12	1933.12	1.99221	2.98872	3.99287
1931.7	0.9945	1931.7	1931.7	1931.7	1.99225	2.98871	3.99287
1930.27	0.99456	1930.27	1930.27	1930.27	1.99229	2.98869	3.99288
1928.84	0.99461	1928.84	1928.84	1928.84	1.99234	2.98868	3.99288
1927.41	0.99466	1927.41	1927.41	1927.41	1.99238	2.98866	3.99288
1925.99	0.99471	1925.99	1925.99	1925.99	1.99242	2.98865	3.99289
1924.56	0.99474	1924.56	1924.56	1924.56	1.99245	2.98863	3.99289
1923.13	0.99477	1923.13	1923.13	1923.13	1.99247	2.98862	3.99289
1921.7	0.99479	1921.7	1921.7	1921.7	1.99249	2.9886	3.9929
1920.27	0.99481	1920.27	1920.27	1920.27	1.9925	2.98859	3.9929
1918.85	0.99485	1918.85	1918.85	1918.85	1.99257	2.98857	3.99291
1917.42	0.99488	1917.42	1917.42	1917.42	1.99264	2.98856	3.99291
1915.99	0.99491	1915.99	1915.99	1915.99	1.99269	2.98854	3.99291
1914.56	0.99495	1914.56	1914.56	1914.56	1.99274	2.98853	3.99292
1913.14	0.99499	1913.14	1913.14	1913.14	1.99279	2.98851	3.99292
1911.71	0.99502	1911.71	1911.71	1911.71	1.99282	2.9885	3.99292
1910.28	0.99506	1910.28	1910.28	1910.28	1.99288	2.98848	3.99293
1908.85	0.99485	1908.85	1908.85	1908.85	1.99204	2.98782	3.99256
1907.43	0.99445	1907.43	1907.43	1907.43	1.99123	2.98709	3.99205
1906	0.99387	1906	1906	1906	1.99058	2.98635	3.99145
1904.57	0.99315	1904.57	1904.57	1904.57	1.99015	2.98564	3.99085
1903.14	0.99232	1903.14	1903.14	1903.14	1.98985	2.98497	3.9903
1901.71	0.99147	1901.71	1901.71	1901.71	1.9895	2.98428	3.98975
1900.29	0.99067	1900.29	1900.29	1900.29	1.98897	2.98353	3.98911
1898.86	0.98999	1898.86	1898.86	1898.86	1.98819	2.98267	3.9883
1897.43	0.98948	1897.43	1897.43	1897.43	1.98715	2.98172	3.98736
1896	0.98895	1896	1896	1896	1.98595	2.98073	3.98639
1894.58	0.98832	1894.58	1894.58	1894.58	1.9847	2.97978	3.98547
1893.15	0.98755	1893.15	1893.15	1893.15	1.98349	2.97889	3.98459
1891.72	0.98662	1891.72	1891.72	1891.72	1.98229	2.97804	3.98371
1890.29	0.98552	1890.29	1890.29	1890.29	1.98103	2.97716	3.98279
1888.86	0.98429	1888.86	1888.86	1888.86	1.97963	2.97619	3.98181
1887.44	0.98294	1887.44	1887.44	1887.44	1.9781	2.97512	3.98081
1886.01	0.98154	1886.01	1886.01	1886.01	1.97658	2.97399	3.97979
1884.58	0.98013	1884.58	1884.58	1884.58	1.97524	2.97286	3.97877
1883.15	0.97874	1883.15	1883.15	1883.15	1.97413	2.97179	3.97778
1881.73	0.97745	1881.73	1881.73	1881.73	1.97323	2.97076	3.97682
1880.3	0.97632	1880.3	1880.3	1880.3	1.97245	2.96974	3.97584
1878.87	0.97543	1878.87	1878.87	1878.87	1.9717	2.96866	3.97473
1877.44	0.97481	1877.44	1877.44	1877.44	1.97091	2.96748	3.97341
1876.02	0.97437	1876.02	1876.02	1876.02	1.97003	2.96625	3.97192
1874.59	0.97404	1874.59	1874.59	1874.59	1.96905	2.96501	3.97038
1873.16	0.97366	1873.16	1873.16	1873.16	1.96802	2.96383	3.9689
1871.73	0.97315	1871.73	1871.73	1871.73	1.96696	2.96271	3.96754
1870.3	0.9724	1870.3	1870.3	1870.3	1.96579	2.9616	3.96625
1868.88	0.97135	1868.88	1868.88	1868.88	1.96438	2.96041	3.96493
1867.45	0.96997	1867.45	1867.45	1867.45	1.96265	2.95909	3.96353
1866.02	0.96824	1866.02	1866.02	1866.02	1.96066	2.95767	3.96206
1864.59	0.96623	1864.59	1864.59	1864.59	1.95859	2.95619	3.96059
1863.17	0.96402	1863.17	1863.17	1863.17	1.95661	2.95475	3.95922
1861.74	0.96172	1861.74	1861.74	1861.74	1.95481	2.95337	3.95793
1860.31	0.95945	1860.31	1860.31	1860.31	1.95315	2.95203	3.95663
1858.88	0.95734	1858.88	1858.88	1858.88	1.95152	2.95063	3.95521
1857.46	0.95549	1857.46	1857.46	1857.46	1.94984	2.94912	3.95357
1856.03	0.95394	1856.03	1856.03	1856.03	1.94813	2.94745	3.95167
1854.6	0.95266	1854.6	1854.6	1854.6	1.94652	2.94566	3.94956
1853.17	0.95151	1853.17	1853.17	1853.17	1.94508	2.94381	3.94729
1851.74	0.95037	1851.74	1851.74	1851.74	1.94375	2.94196	3.94493
1850.32	0.94914	1850.32	1850.32	1850.32	1.94238	2.9401	3.94254
1848.89	0.94775	1848.89	1848.89	1848.89	1.9408	2.93818	3.94013
1847.46	0.94612	1847.46	1847.46	1847.46	1.93883	2.93615	3.93766
1846.03	0.9442	1846.03	1846.03	1846.03	1.93643	2.93398	3.9351
1844.61	0.9419	1844.61	1844.61	1844.61	1.93364	2.9317	3.93246
1843.18	0.9392	1843.18	1843.18	1843.18	1.93066	2.92937	3.92977
1841.75	0.93618	1841.75	1841.75	1841.75	1.92773	2.92707	3.92709
1840.32	0.93297	1840.32	1840.32	1840.32	1.92501	2.92481	3.92443
1838.89	0.92971	1838.89	1838.89	1838.89	1.92245	2.92251	3.92174
1837.47	0.92652	1837.47	1837.47	1837.47	1.91986	2.92008	3.91892
1836.04	0.92346	1836.04	1836.04	1836.04	1.91711	2.91746	3.9159
1834.61	0.92051	1834.61	1834.61	1834.61	1.91425	2.91466	3.91264
1833.18	0.91759	1833.18	1833.18	1833.18	1.91147	2.91175	3.90917
1831.76	0.91453	1831.76	1831.76	1831.76	1.90891	2.90882	3.90561
1830.33	0.91121	1830.33	1830.33	1830.33	1.90648	2.9059	3.90206
1828.9	0.90757	1828.9	1828.9	1828.9	1.90395	2.90299	3.89851
1827.47	0.90364	1827.47	1827.47	1827.47	1.90109	2.90001	3.8949
1826.05	0.89949	1826.05	1826.05	1826.05	1.89774	2.8969	3.89118
1824.62	0.89512	1824.62	1824.62	1824.62	1.89388	2.89363	3.88735
1823.19	0.8905	1823.19	1823.19	1823.19	1.88966	2.89023	3.88348
1821.76	0.88561	1821.76	1821.76	1821.76	1.88531	2.88677	3.87958
1820.33	0.88052	1820.33	1820.33	1820.33	1.88108	2.88329	3.87561
1818.91	0.87537	1818.91	1818.91	1818.91	1.87707	2.87977	3.87149
1817.48	0.8703	1817.48	1817.48	1817.48	1.87317	2.87617	3.86718
1816.05	0.86539	1816.05	1816.05	1816.05	1.86918	2.87238	3.86266
1814.62	0.86066	1814.62	1814.62	1814.62	1.86494	2.8684	3.85795
1813.2	0.856	1813.2	1813.2	1813.2	1.86055	2.86425	3.85304
1811.77	0.85131	1811.77	1811.77	1811.77	1.8562	2.86001	3.84791
1810.34	0.84651	1810.34	1810.34	1810.34	1.85203	2.85573	3.8426
1808.91	0.84156	1808.91	1808.91	1808.91	1.84797	2.85139	3.83716
1807.49	0.83648	1807.49	1807.49	1807.49	1.84381	2.84692	3.83159
1806.06	0.83135	1806.06	1806.06	1806.06	1.83929	2.84223	3.82584
1804.63	0.82617	1804.63	1804.63	1804.63	1.83433	2.83729	3.81987
1803.2	0.82091	1803.2	1803.2	1803.2	1.82902	2.83209	3.81363
1801.77	0.81542	1801.77	1801.77	1801.77	1.82359	2.82668	3.8071
1800.35	0.80958	1800.35	1800.35	1800.35	1.81815	2.8211	3.80033
1798.92	0.80334	1798.92	1798.92	1798.92	1.81265	2.81537	3.79337
1797.49	0.7967	1797.49	1797.49	1797.49	1.80693	2.80949	3.78622
1796.06	0.78969	1796.06	1796.06	1796.06	1.80082	2.80339	3.77884
1794.64	0.78223	1794.64	1794.64	1794.64	1.79416	2.79702	3.77117
1793.21	0.77421	1793.21	1793.21	1793.21	1.78697	2.79034	3.7632
1791.78	0.76553	1791.78	1791.78	1791.78	1.77943	2.78338	3.75496
1790.35	0.75621	1790.35	1790.35	1790.35	1.77175	2.77618	3.74647
1788.92	0.74637	1788.92	1788.92	1788.92	1.76402	2.76871	3.73766
1787.5	0.73623	1787.5	1787.5	1787.5	1.75612	2.76093	3.72848
1786.07	0.72598	1786.07	1786.07	1786.07	1.74783	2.75276	3.71894
1784.64	0.7157	1784.64	1784.64	1784.64	1.73905	2.74421	3.70907
1783.21	0.70539	1783.21	1783.21	1783.21	1.72991	2.7353	3.69885
1781.79	0.695	1781.79	1781.79	1781.79	1.72063	2.72599	3.68811
1780.36	0.68438	1780.36	1780.36	1780.36	1.71131	2.71626	3.67672
1778.93	0.67342	1778.93	1778.93	1778.93	1.70184	2.70607	3.66464
1777.5	0.66204	1777.5	1777.5	1777.5	1.69192	2.69536	3.6519
1776.08	0.65018	1776.08	1776.08	1776.08	1.6812	2.68407	3.63857
1774.65	0.63772	1774.65	1774.65	1774.65	1.66957	2.67217	3.62467
1773.22	0.62441	1773.22	1773.22	1773.22	1.65706	2.65965	3.6102
1771.79	0.60999	1771.79	1771.79	1771.79	1.64376	2.64641	3.59499
1770.36	0.59434	1770.36	1770.36	1770.36	1.62975	2.63235	3.57893
1768.94	0.57749	1768.94	1768.94	1768.94	1.61509	2.61749	3.56204
1767.51	0.55963	1767.51	1767.51	1767.51	1.59977	2.60174	3.54429
1766.08	0.54094	1766.08	1766.08	1766.08	1.58351	2.58495	3.5255
1764.65	0.52155	1764.65	1764.65	1764.65	1.5661	2.56699	3.50558
1763.23	0.50144	1763.23	1763.23	1763.23	1.54757	2.54791	3.48458
1761.8	0.48051	1761.8	1761.8	1761.8	1.52813	2.52773	3.4625
1760.37	0.45864	1760.37	1760.37	1760.37	1.50785	2.50621	3.43913
1758.94	0.43578	1758.94	1758.94	1758.94	1.48652	2.48302	3.41421
1757.52	0.41186	1757.52	1757.52	1757.52	1.46382	2.45801	3.38773
1756.09	0.38685	1756.09	1756.09	1756.09	1.4395	2.43118	3.35992
1754.66	0.36081	1754.66	1754.66	1754.66	1.41333	2.40259	3.33104
1753.23	0.33381	1753.23	1753.23	1753.23	1.38534	2.37245	3.30146
1751.8	0.30596	1751.8	1751.8	1751.8	1.35587	2.34113	3.27167
1750.38	0.27739	1750.38	1750.38	1750.38	1.32536	2.30899	3.24203
1748.95	0.24838	1748.95	1748.95	1748.95	1.29405	2.27628	3.21279
1747.52	0.21941	1747.52	1747.52	1747.52	1.26235	2.24354	3.18441
1746.09	0.19101	1746.09	1746.09	1746.09	1.23086	2.21151	3.15749
1744.67	0.16371	1744.67	1744.67	1744.67	1.20012	2.1807	3.13239
1743.24	0.13795	1743.24	1743.24	1743.24	1.17043	2.15148	3.10931
1741.81	0.11403	1741.81	1741.81	1741.81	1.14217	2.12432	3.08849
1740.38	0.0921	1740.38	1740.38	1740.38	1.11589	2.09971	3.07019
1738.95	0.07223	1738.95	1738.95	1738.95	1.09205	2.07789	3.05439
1737.53	0.05452	1737.53	1737.53	1737.53	1.07084	2.05886	3.04089
1736.1	0.03906	1736.1	1736.1	1736.1	1.05231	2.04257	3.02952
1734.67	0.02596	1734.67	1734.67	1734.67	1.03649	2.02905	3.0202
1733.24	0.01534	1733.24	1733.24	1733.24	1.02344	2.01829	3.01287
1731.82	0.00738	1731.82	1731.82	1731.82	1.01317	2.01019	3.00737
1730.39	0.00225	1730.39	1730.39	1730.39	1.00572	2.00457	3.00352
1728.96	0	1728.96	1728.96	1728.96	1.00127	2.00123	3.00112
1727.53	5.80236E-4	1727.53	1727.53	1727.53	1	2	3
1726.11	0.00393	1726.11	1726.11	1726.11	1.00203	2.00085	3.00013
1724.68	0.00993	1724.68	1724.68	1724.68	1.0073	2.00383	3.0016
1723.25	0.01833	1723.25	1723.25	1723.25	1.01548	2.00883	3.00438
1721.82	0.02874	1721.82	1721.82	1721.82	1.02599	2.01549	3.0083
1720.39	0.04061	1720.39	1720.39	1720.39	1.03818	2.02348	3.01321
1718.97	0.05333	1718.97	1718.97	1718.97	1.05153	2.03259	3.01906
1717.54	0.06632	1717.54	1717.54	1717.54	1.06569	2.04263	3.02579
1716.11	0.07912	1716.11	1716.11	1716.11	1.08042	2.05352	3.03343
1714.68	0.09154	1714.68	1714.68	1714.68	1.09537	2.06518	3.04203
1713.26	0.10362	1713.26	1713.26	1713.26	1.10999	2.07732	3.0514
1711.83	0.11556	1711.83	1711.83	1711.83	1.12395	2.08964	3.06132
1710.4	0.1276	1710.4	1710.4	1710.4	1.13756	2.10235	3.07196
1708.97	0.14008	1708.97	1708.97	1708.97	1.15143	2.11588	3.0837
1707.55	0.15329	1707.55	1707.55	1707.55	1.16593	2.13043	3.09672
1706.12	0.16747	1706.12	1706.12	1706.12	1.18161	2.14637	3.11126
1704.69	0.18289	1704.69	1704.69	1704.69	1.19936	2.16454	3.12805
1703.26	0.19998	1703.26	1703.26	1703.26	1.21957	2.18563	3.14772
1701.83	0.21915	1701.83	1701.83	1701.83	1.24207	2.20979	3.17044
1700.41	0.24075	1700.41	1700.41	1700.41	1.26681	2.23704	3.19633
1698.98	0.26491	1698.98	1698.98	1698.98	1.29402	2.2676	3.22563
1697.55	0.29168	1697.55	1697.55	1697.55	1.32373	2.30128	3.25819
1696.12	0.32107	1696.12	1696.12	1696.12	1.35568	2.33748	3.29336
1694.7	0.35306	1694.7	1694.7	1694.7	1.39006	2.37595	3.33089
1693.27	0.38759	1693.27	1693.27	1693.27	1.42719	2.4168	3.37102
1691.84	0.42452	1691.84	1691.84	1691.84	1.46648	2.45952	3.41348
1690.41	0.46352	1690.41	1690.41	1690.41	1.50665	2.50289	3.45722
1688.98	0.50403	1688.98	1688.98	1688.98	1.54674	2.54579	3.50114
1687.56	0.54532	1687.56	1687.56	1687.56	1.58633	2.58754	3.54447
1686.13	0.58652	1686.13	1686.13	1686.13	1.62495	2.62749	3.58648
1684.7	0.62667	1684.7	1684.7	1684.7	1.66188	2.66493	3.62647
1683.27	0.66484	1683.27	1683.27	1683.27	1.69657	2.69949	3.66406
1681.85	0.70038	1681.85	1681.85	1681.85	1.72853	2.73103	3.699
1680.42	0.73297	1680.42	1680.42	1680.42	1.75723	2.75914	3.73073
1678.99	0.7624	1678.99	1678.99	1678.99	1.78243	2.78357	3.75885
1677.56	0.78841	1677.56	1677.56	1677.56	1.80429	2.80447	3.78351
1676.14	0.81071	1676.14	1676.14	1676.14	1.82293	2.8221	3.80489
1674.71	0.82911	1674.71	1674.71	1674.71	1.83837	2.83647	3.82284
1673.28	0.84374	1673.28	1673.28	1673.28	1.85107	2.84787	3.83739
1671.85	0.85501	1671.85	1671.85	1671.85	1.86199	2.85717	3.84929
1670.42	0.86338	1670.42	1670.42	1670.42	1.87159	2.86514	3.8594
1669	0.86928	1669	1669	1669	1.87955	2.87186	3.868
1667.57	0.87315	1667.57	1667.57	1667.57	1.88559	2.87726	3.87504
1666.14	0.87547	1666.14	1666.14	1666.14	1.88991	2.88143	3.88053
1664.71	0.87677	1664.71	1664.71	1664.71	1.89321	2.88459	3.88448
1663.29	0.87749	1663.29	1663.29	1663.29	1.89638	2.88708	3.8871
1661.86	0.87799	1661.86	1661.86	1661.86	1.8997	2.88926	3.88895
1660.43	0.87862	1660.43	1660.43	1660.43	1.90284	2.89125	3.89046
1659	0.87967	1659	1659	1659	1.9056	2.89303	3.89168
1657.58	0.8813	1657.58	1657.58	1657.58	1.9083	2.89472	3.8927
1656.15	0.88342	1656.15	1656.15	1656.15	1.9114	2.89662	3.89384
1654.72	0.88579	1654.72	1654.72	1654.72	1.91488	2.89888	3.8955
1653.29	0.88818	1653.29	1653.29	1653.29	1.91841	2.90148	3.89787
1651.86	0.89046	1651.86	1651.86	1651.86	1.92178	2.90436	3.90093
1650.44	0.89279	1650.44	1650.44	1650.44	1.9249	2.90748	3.90462
1649.01	0.89525	1649.01	1649.01	1649.01	1.9277	2.91081	3.90884
1647.58	0.89773	1647.58	1647.58	1647.58	1.93024	2.91429	3.91351
1646.15	0.90002	1646.15	1646.15	1646.15	1.93295	2.91794	3.91854
1644.73	0.90208	1644.73	1644.73	1644.73	1.93635	2.92176	3.9239
1643.3	0.90407	1643.3	1643.3	1643.3	1.94068	2.92562	3.92939
1641.87	0.90621	1641.87	1641.87	1641.87	1.94595	2.92939	3.93475
1640.44	0.90861	1640.44	1640.44	1640.44	1.95195	2.93301	3.93986
1639.01	0.91123	1639.01	1639.01	1639.01	1.95803	2.9365	3.94484
1637.59	0.91394	1637.59	1637.59	1637.59	1.96367	2.93989	3.94967
1636.16	0.91657	1636.16	1636.16	1636.16	1.96879	2.94324	3.95419
1634.73	0.91903	1634.73	1634.73	1634.73	1.97362	2.94671	3.95831
1633.3	0.92147	1633.3	1633.3	1633.3	1.97822	2.95043	3.96205
1631.88	0.92416	1631.88	1631.88	1631.88	1.98225	2.95441	3.96556
1630.45	0.92735	1630.45	1630.45	1630.45	1.98521	2.95851	3.96888
1629.02	0.93118	1629.02	1629.02	1629.02	1.98694	2.96259	3.97201
1627.59	0.93565	1627.59	1627.59	1627.59	1.98774	2.96662	3.97484
1626.17	0.9405	1626.17	1626.17	1626.17	1.98816	2.97063	3.97723
1624.74	0.9454	1624.74	1624.74	1624.74	1.98872	2.97461	3.97912
1623.31	0.95	1623.31	1623.31	1623.31	1.9897	2.97853	3.98062
1621.88	0.9541	1621.88	1621.88	1621.88	1.991	2.98226	3.98191
1620.45	0.95755	1620.45	1620.45	1620.45	1.9922	2.98556	3.98297
1619.03	0.96009	1619.03	1619.03	1619.03	1.99288	2.98823	3.98359
1617.6	0.96132	1617.6	1617.6	1617.6	1.99295	2.99016	3.98354
1616.17	0.96082	1616.17	1616.17	1616.17	1.99244	2.99136	3.98263
1614.74	0.9584	1614.74	1614.74	1614.74	1.99088	2.99177	3.9808
1613.32	0.9542	1613.32	1613.32	1613.32	1.98821	2.99131	3.97799
1611.89	0.94866	1611.89	1611.89	1611.89	1.98443	2.98985	3.97418
1610.46	0.94243	1610.46	1610.46	1610.46	1.97962	2.98739	3.96949
1609.03	0.93617	1609.03	1609.03	1609.03	1.97397	2.98406	3.96423
1607.61	0.93052	1607.61	1607.61	1607.61	1.96793	2.98016	3.95891
1606.18	0.92604	1606.18	1606.18	1606.18	1.96232	2.97616	3.95411
1604.75	0.9232	1604.75	1604.75	1604.75	1.9581	2.97262	3.9504
1603.32	0.92242	1603.32	1603.32	1603.32	1.9559	2.97003	3.94828
1601.89	0.92398	1601.89	1601.89	1601.89	1.95582	2.96867	3.94802
1600.47	0.92798	1600.47	1600.47	1600.47	1.95762	2.96865	3.9497
1599.04	0.93423	1599.04	1599.04	1599.04	1.96097	2.96988	3.95322
1597.61	0.94228	1597.61	1597.61	1597.61	1.96559	2.97218	3.95823
1596.18	0.95136	1596.18	1596.18	1596.18	1.97113	2.97531	3.96421
1594.76	0.96073	1594.76	1594.76	1594.76	1.97709	2.97901	3.97058
1593.33	0.96974	1593.33	1593.33	1593.33	1.98289	2.98296	3.97683
1591.9	0.97779	1591.9	1591.9	1591.9	1.98784	2.98674	3.98249
1590.47	0.98444	1590.47	1590.47	1590.47	1.99126	2.98989	3.98718
1589.05	0.98941	1589.05	1589.05	1589.05	1.99275	2.99212	3.99069
1587.62	0.99257	1587.62	1587.62	1587.62	1.99288	2.99327	3.99288
1586.19	0.99392	1586.19	1586.19	1586.19	1.99266	2.99338	3.99374
1584.76	0.99396	1584.76	1584.76	1584.76	1.99107	2.99256	3.99347
1583.33	0.99403	1583.33	1583.33	1583.33	1.98843	2.99107	3.99249
1581.91	0.99281	1581.91	1581.91	1581.91	1.98517	2.9892	3.99126
1580.48	0.99047	1580.48	1580.48	1580.48	1.98162	2.98715	3.99006
1579.05	0.98727	1579.05	1579.05	1579.05	1.9779	2.98499	3.98894
1577.62	0.98354	1577.62	1577.62	1577.62	1.97393	2.98273	3.98791
1576.2	0.9795	1576.2	1576.2	1576.2	1.96972	2.98038	3.98697
1574.77	0.97542	1574.77	1574.77	1574.77	1.96537	2.97801	3.98614
1573.34	0.9715	1573.34	1573.34	1573.34	1.96096	2.97575	3.98549
1571.91	0.96802	1571.91	1571.91	1571.91	1.95654	2.97374	3.98514
1570.48	0.96508	1570.48	1570.48	1570.48	1.95238	2.97208	3.98503
1569.06	0.96262	1569.06	1569.06	1569.06	1.94877	2.97064	3.9847
1567.63	0.96059	1567.63	1567.63	1567.63	1.94555	2.96919	3.98385
1566.2	0.95892	1566.2	1566.2	1566.2	1.94248	2.96761	3.98252
1564.77	0.95743	1564.77	1564.77	1564.77	1.9395	2.96585	3.98081
1563.35	0.95581	1563.35	1563.35	1563.35	1.93653	2.96388	3.97877
1561.92	0.95366	1561.92	1561.92	1561.92	1.93345	2.96168	3.97648
1560.49	0.95065	1560.49	1560.49	1560.49	1.93026	2.95931	3.97406
1559.06	0.94657	1559.06	1559.06	1559.06	1.92703	2.95681	3.97159
1557.64	0.94148	1557.64	1557.64	1557.64	1.92377	2.95419	3.96912
1556.21	0.93576	1556.21	1556.21	1556.21	1.92037	2.95147	3.96673
1554.78	0.92988	1554.78	1554.78	1554.78	1.91679	2.94871	3.96446
1553.35	0.92423	1553.35	1553.35	1553.35	1.91316	2.94605	3.9623
1551.92	0.91923	1551.92	1551.92	1551.92	1.90979	2.94359	3.96022
1550.5	0.91516	1550.5	1550.5	1550.5	1.90703	2.9414	3.95813
1549.07	0.91215	1549.07	1549.07	1549.07	1.9049	2.9394	3.9559
1547.64	0.91019	1547.64	1547.64	1547.64	1.90326	2.93747	3.95337
1546.21	0.90911	1546.21	1546.21	1546.21	1.90184	2.93546	3.95039
1544.79	0.90862	1544.79	1544.79	1544.79	1.90025	2.93333	3.94711
1543.36	0.90824	1543.36	1543.36	1543.36	1.89839	2.93114	3.94379
1541.93	0.90746	1541.93	1541.93	1541.93	1.89633	2.92896	3.9406
1540.5	0.90585	1540.5	1540.5	1540.5	1.89409	2.92677	3.9376
1539.08	0.90324	1539.08	1539.08	1539.08	1.89165	2.92456	3.93478
1537.65	0.89981	1537.65	1537.65	1537.65	1.88896	2.92228	3.93202
1536.22	0.89591	1536.22	1536.22	1536.22	1.88601	2.91988	3.92921
1534.79	0.89194	1534.79	1534.79	1534.79	1.88291	2.91737	3.92634
1533.36	0.88817	1533.36	1533.36	1533.36	1.88	2.91485	3.92346
1531.94	0.88476	1531.94	1531.94	1531.94	1.87766	2.91237	3.92046
1530.51	0.88174	1530.51	1530.51	1530.51	1.87605	2.9099	3.91708
1529.08	0.87901	1529.08	1529.08	1529.08	1.87506	2.90735	3.9131
1527.65	0.87646	1527.65	1527.65	1527.65	1.87425	2.90454	3.90839
1526.23	0.874	1526.23	1526.23	1526.23	1.87284	2.90123	3.90298
1524.8	0.87154	1524.8	1524.8	1524.8	1.87025	2.89731	3.89696
1523.37	0.86886	1523.37	1523.37	1523.37	1.86642	2.89279	3.89038
1521.94	0.86562	1521.94	1521.94	1521.94	1.86156	2.8877	3.88315
1520.51	0.8615	1520.51	1520.51	1520.51	1.85596	2.88211	3.87529
1519.09	0.85635	1519.09	1519.09	1519.09	1.84993	2.87619	3.867
1517.66	0.85025	1517.66	1517.66	1517.66	1.84394	2.87009	3.85843
1516.23	0.84347	1516.23	1516.23	1516.23	1.83815	2.86359	3.84919
1514.8	0.83625	1514.8	1514.8	1514.8	1.83221	2.8563	3.83873
1513.38	0.82861	1513.38	1513.38	1513.38	1.82584	2.84804	3.82688
1511.95	0.82029	1511.95	1511.95	1511.95	1.81897	2.83885	3.81374
1510.52	0.81082	1510.52	1510.52	1510.52	1.81169	2.82874	3.79929
1509.09	0.79971	1509.09	1509.09	1509.09	1.80384	2.81745	3.78323
1507.67	0.78646	1507.67	1507.67	1507.67	1.79484	2.80446	3.76497
1506.24	0.77074	1506.24	1506.24	1506.24	1.78379	2.78906	3.74382
1504.81	0.75258	1504.81	1504.81	1504.81	1.76987	2.77064	3.71936
1503.38	0.73233	1503.38	1503.38	1503.38	1.75271	2.74907	3.6917
1501.95	0.71044	1501.95	1501.95	1501.95	1.7325	2.72461	3.6614
1500.53	0.68731	1500.53	1500.53	1500.53	1.70988	2.6977	3.6291
1499.1	0.66347	1499.1	1499.1	1499.1	1.68576	2.66896	3.59551
1497.67	0.63962	1497.67	1497.67	1497.67	1.66127	2.63932	3.56161
1496.24	0.61665	1496.24	1496.24	1496.24	1.63765	2.60993	3.52856
1494.82	0.59555	1494.82	1494.82	1494.82	1.61596	2.58184	3.49738
1493.39	0.57723	1493.39	1493.39	1493.39	1.59674	2.55588	3.46884
1491.96	0.56237	1491.96	1491.96	1491.96	1.58045	2.53296	3.4439
1490.53	0.55132	1490.53	1490.53	1490.53	1.56773	2.51411	3.42358
1489.11	0.54418	1489.11	1489.11	1489.11	1.55918	2.50004	3.40849
1487.68	0.5408	1487.68	1487.68	1487.68	1.55495	2.49092	3.39861
1486.25	0.54091	1486.25	1486.25	1486.25	1.55468	2.48641	3.39344
1484.82	0.54417	1484.82	1484.82	1484.82	1.5576	2.48575	3.39211
1483.39	0.55017	1483.39	1483.39	1483.39	1.56281	2.48806	3.3937
1481.97	0.55841	1481.97	1481.97	1481.97	1.5696	2.49272	3.39767
1480.54	0.56818	1480.54	1480.54	1480.54	1.57746	2.49923	3.40367
1479.11	0.57859	1479.11	1479.11	1479.11	1.58586	2.50696	3.41118
1477.68	0.58877	1477.68	1477.68	1477.68	1.59426	2.51512	3.41951
1476.26	0.59808	1476.26	1476.26	1476.26	1.60216	2.52301	3.42799
1474.83	0.60608	1474.83	1474.83	1474.83	1.60908	2.53013	3.43618
1473.4	0.61248	1473.4	1473.4	1473.4	1.61458	2.5361	3.44373
1471.97	0.61712	1471.97	1471.97	1471.97	1.61837	2.54067	3.45038
1470.54	0.61995	1470.54	1470.54	1470.54	1.62048	2.54373	3.45593
1469.12	0.621	1469.12	1469.12	1469.12	1.62128	2.54528	3.46023
1467.69	0.62044	1467.69	1467.69	1467.69	1.62117	2.54528	3.46307
1466.26	0.61856	1466.26	1466.26	1466.26	1.62021	2.54368	3.46428
1464.83	0.61577	1464.83	1464.83	1464.83	1.61828	2.54059	3.46387
1463.41	0.61258	1463.41	1463.41	1463.41	1.61536	2.53627	3.46203
1461.98	0.60954	1461.98	1461.98	1461.98	1.6117	2.53116	3.45912
1460.55	0.60706	1460.55	1460.55	1460.55	1.60781	2.52584	3.45566
1459.12	0.60537	1459.12	1459.12	1459.12	1.6043	2.521	3.45233
1457.7	0.60461	1457.7	1457.7	1457.7	1.60172	2.51732	3.44983
1456.27	0.60502	1456.27	1456.27	1456.27	1.60062	2.51546	3.44883
1454.84	0.60712	1454.84	1454.84	1454.84	1.60143	2.51594	3.44992
1453.41	0.61148	1453.41	1453.41	1453.41	1.60448	2.51916	3.4536
1451.98	0.61853	1451.98	1451.98	1451.98	1.60999	2.52541	3.46031
1450.56	0.62844	1450.56	1450.56	1450.56	1.61809	2.53482	3.47035
1449.13	0.64117	1449.13	1449.13	1449.13	1.62893	2.54735	3.48374
1447.7	0.65651	1447.7	1447.7	1447.7	1.64285	2.56284	3.50025
1446.27	0.67414	1446.27	1446.27	1446.27	1.66007	2.58105	3.51962
1444.85	0.69363	1444.85	1444.85	1444.85	1.68007	2.60146	3.54143
1443.42	0.71448	1443.42	1443.42	1443.42	1.70164	2.6233	3.56508
1441.99	0.73606	1441.99	1441.99	1441.99	1.72346	2.64575	3.58984
1440.56	0.75768	1440.56	1440.56	1440.56	1.7446	2.66805	3.6149
1439.14	0.77858	1439.14	1439.14	1439.14	1.76446	2.68955	3.63943
1437.71	0.79798	1437.71	1437.71	1437.71	1.78264	2.70967	3.66269
1436.28	0.81522	1436.28	1436.28	1436.28	1.79883	2.72794	3.68406
1434.85	0.82995	1434.85	1434.85	1434.85	1.81278	2.74403	3.7031
1433.42	0.84218	1433.42	1433.42	1433.42	1.82416	2.7577	3.71947
1432	0.85215	1432	1432	1432	1.83281	2.76878	3.73297
1430.57	0.86011	1430.57	1430.57	1430.57	1.8389	2.77737	3.74361
1429.14	0.86618	1429.14	1429.14	1429.14	1.84302	2.78374	3.7517
1427.71	0.87045	1427.71	1427.71	1427.71	1.84582	2.78824	3.75769
1426.29	0.87302	1426.29	1426.29	1426.29	1.84784	2.79122	3.76207
1424.86	0.87401	1424.86	1424.86	1424.86	1.84952	2.79313	3.76539
1423.43	0.87362	1423.43	1423.43	1423.43	1.85096	2.79431	3.76812
1422	0.87199	1422	1422	1422	1.85177	2.79478	3.77042
1420.57	0.8692	1420.57	1420.57	1420.57	1.85154	2.79435	3.77213
1419.15	0.86521	1419.15	1419.15	1419.15	1.85007	2.79287	3.77302
1417.72	0.86	1417.72	1417.72	1417.72	1.84743	2.7903	3.77284
1416.29	0.85365	1416.29	1416.29	1416.29	1.84377	2.78661	3.77134
1414.86	0.84643	1414.86	1414.86	1414.86	1.83913	2.78175	3.76825
1413.44	0.83878	1413.44	1413.44	1413.44	1.83348	2.77568	3.76336
1412.01	0.83122	1412.01	1412.01	1412.01	1.82679	2.76846	3.75669
1410.58	0.82422	1410.58	1410.58	1410.58	1.81922	2.7603	3.74838
1409.15	0.8181	1409.15	1409.15	1409.15	1.81125	2.75155	3.73873
1407.73	0.81295	1407.73	1407.73	1407.73	1.80367	2.74272	3.72815
1406.3	0.80875	1406.3	1406.3	1406.3	1.79723	2.73428	3.71724
1404.87	0.80542	1404.87	1404.87	1404.87	1.79236	2.7266	3.70654
1403.44	0.80293	1403.44	1403.44	1403.44	1.789	2.7198	3.69642
1402.01	0.80125	1402.01	1402.01	1402.01	1.78678	2.71379	3.68703
1400.59	0.80039	1400.59	1400.59	1400.59	1.78521	2.70839	3.67833
1399.16	0.8003	1399.16	1399.16	1399.16	1.78395	2.70339	3.67019
1397.73	0.80091	1397.73	1397.73	1397.73	1.78302	2.69876	3.66264
1396.3	0.8022	1396.3	1396.3	1396.3	1.78285	2.69479	3.65605
1394.88	0.80434	1394.88	1394.88	1394.88	1.784	2.69201	3.65102
1393.45	0.80766	1393.45	1393.45	1393.45	1.78687	2.69096	3.64822
1392.02	0.81268	1392.02	1392.02	1392.02	1.79158	2.69219	3.64836
1390.59	0.81981	1390.59	1390.59	1390.59	1.79808	2.69618	3.65209
1389.17	0.82923	1389.17	1389.17	1389.17	1.80634	2.70327	3.65992
1387.74	0.84079	1387.74	1387.74	1387.74	1.81639	2.71354	3.67198
1386.31	0.85398	1386.31	1386.31	1386.31	1.82827	2.72675	3.68792
1384.88	0.86807	1384.88	1384.88	1384.88	1.84189	2.74232	3.70687
1383.45	0.88223	1383.45	1383.45	1383.45	1.8567	2.75931	3.72756
1382.03	0.89577	1382.03	1382.03	1382.03	1.87167	2.77645	3.74846
1380.6	0.90808	1380.6	1380.6	1380.6	1.88546	2.79241	3.76805
1379.17	0.91869	1379.17	1379.17	1379.17	1.89682	2.806	3.78497
1377.74	0.92722	1377.74	1377.74	1377.74	1.90503	2.81636	3.79813
1376.32	0.93338	1376.32	1376.32	1376.32	1.91006	2.82312	3.80695
1374.89	0.93711	1374.89	1374.89	1374.89	1.91255	2.82646	3.81141
1373.46	0.93865	1373.46	1373.46	1373.46	1.91341	2.82703	3.8121
1372.03	0.93857	1372.03	1372.03	1372.03	1.91339	2.82569	3.81
1370.6	0.93769	1370.6	1370.6	1370.6	1.91294	2.82337	3.80625
1369.18	0.93688	1369.18	1369.18	1369.18	1.91235	2.82098	3.80204
1367.75	0.93686	1367.75	1367.75	1367.75	1.91205	2.81939	3.79844
1366.32	0.93802	1366.32	1366.32	1366.32	1.91266	2.81928	3.79636
1364.89	0.94048	1364.89	1364.89	1364.89	1.91494	2.82111	3.79637
1363.47	0.94412	1363.47	1363.47	1363.47	1.91942	2.82504	3.79872
1362.04	0.94874	1362.04	1362.04	1362.04	1.92618	2.83089	3.80321
1360.61	0.95417	1360.61	1360.61	1360.61	1.93466	2.83815	3.80934
1359.18	0.96026	1359.18	1359.18	1359.18	1.94391	2.84615	3.81648
1357.76	0.96679	1357.76	1357.76	1357.76	1.95296	2.85419	3.82402
1356.33	0.97342	1356.33	1356.33	1356.33	1.96115	2.86171	3.8315
1354.9	0.97968	1354.9	1354.9	1354.9	1.96816	2.8683	3.83858
1353.47	0.98508	1353.47	1353.47	1353.47	1.97395	2.87372	3.84501
1352.04	0.98926	1352.04	1352.04	1352.04	1.97852	2.87782	3.8505
1350.62	0.99209	1350.62	1350.62	1350.62	1.98164	2.88043	3.85475
1349.19	0.99364	1349.19	1349.19	1349.19	1.98286	2.88144	3.85752
1347.76	0.99403	1347.76	1347.76	1347.76	1.98169	2.88076	3.85867
1346.33	0.99349	1346.33	1346.33	1346.33	1.97803	2.87851	3.85823
1344.91	0.99187	1344.91	1344.91	1344.91	1.97235	2.87497	3.85637
1343.48	0.98911	1343.48	1343.48	1343.48	1.96548	2.87052	3.85332
1342.05	0.98518	1342.05	1342.05	1342.05	1.95825	2.86556	3.84937
1340.62	0.98017	1340.62	1340.62	1340.62	1.95115	2.8603	3.84467
1339.2	0.97435	1339.2	1339.2	1339.2	1.94427	2.85482	3.83931
1337.77	0.9681	1337.77	1337.77	1337.77	1.93748	2.84911	3.83332
1336.34	0.96179	1336.34	1336.34	1336.34	1.93069	2.84321	3.82682
1334.91	0.95563	1334.91	1334.91	1334.91	1.92408	2.83728	3.82008
1333.48	0.94968	1333.48	1333.48	1333.48	1.91805	2.83157	3.81346
1332.06	0.94392	1332.06	1332.06	1332.06	1.91297	2.82634	3.80731
1330.63	0.93837	1330.63	1330.63	1330.63	1.90895	2.8217	3.80183
1329.2	0.93314	1329.2	1329.2	1329.2	1.90573	2.81762	3.79699
1327.77	0.92837	1327.77	1327.77	1327.77	1.90274	2.8139	3.79262
1326.35	0.92416	1326.35	1326.35	1326.35	1.89944	2.81036	3.78852
1324.92	0.92045	1324.92	1324.92	1324.92	1.89558	2.80688	3.7846
1323.49	0.91698	1323.49	1323.49	1323.49	1.89131	2.80345	3.78085
1322.06	0.91345	1322.06	1322.06	1322.06	1.88697	2.80011	3.77723
1320.63	0.90959	1320.63	1320.63	1320.63	1.88281	2.79677	3.77358
1319.21	0.90521	1319.21	1319.21	1319.21	1.87876	2.79325	3.76965
1317.78	0.90029	1317.78	1317.78	1317.78	1.87446	2.78922	3.7651
1316.35	0.89486	1316.35	1316.35	1316.35	1.86949	2.78436	3.75963
1314.92	0.8889	1314.92	1314.92	1314.92	1.86364	2.77846	3.75302
1313.5	0.88228	1313.5	1313.5	1313.5	1.85701	2.77148	3.74518
1312.07	0.87482	1312.07	1312.07	1312.07	1.84992	2.76347	3.73614
1310.64	0.86634	1310.64	1310.64	1310.64	1.84263	2.75453	3.72593
1309.21	0.85683	1309.21	1309.21	1309.21	1.83509	2.74465	3.71456
1307.79	0.84641	1307.79	1307.79	1307.79	1.82693	2.73374	3.702
1306.36	0.8353	1306.36	1306.36	1306.36	1.81762	2.72168	3.68822
1304.93	0.82368	1304.93	1304.93	1304.93	1.8068	2.70841	3.67322
1303.5	0.81157	1303.5	1303.5	1303.5	1.79449	2.69401	3.65715
1302.07	0.79892	1302.07	1302.07	1302.07	1.78107	2.67868	3.6402
1300.65	0.78562	1300.65	1300.65	1300.65	1.76702	2.66262	3.62257
1299.22	0.77163	1299.22	1299.22	1299.22	1.75266	2.64593	3.60438
1297.79	0.75707	1297.79	1297.79	1297.79	1.73792	2.6286	3.58565
1296.36	0.74212	1296.36	1296.36	1296.36	1.72256	2.61053	3.56631
1294.94	0.72698	1294.94	1294.94	1294.94	1.70635	2.59164	3.54632
1293.51	0.71175	1293.51	1293.51	1293.51	1.68936	2.57195	3.52568
1292.08	0.69642	1292.08	1292.08	1292.08	1.67197	2.55163	3.50453
1290.65	0.68093	1290.65	1290.65	1290.65	1.65472	2.53091	3.48305
1289.23	0.66531	1289.23	1289.23	1289.23	1.638	2.51002	3.46142
1287.8	0.64977	1287.8	1287.8	1287.8	1.62187	2.48916	3.43978
1286.37	0.63464	1286.37	1286.37	1286.37	1.6061	2.46845	3.41826
1284.94	0.62034	1284.94	1284.94	1284.94	1.59042	2.44809	3.39704
1283.51	0.60721	1283.51	1283.51	1283.51	1.57483	2.42836	3.37637
1282.09	0.5955	1282.09	1282.09	1282.09	1.55973	2.40968	3.35661
1280.66	0.58531	1280.66	1280.66	1280.66	1.54579	2.39255	3.33817
1279.23	0.57676	1279.23	1279.23	1279.23	1.53371	2.37745	3.32143
1277.8	0.56997	1277.8	1277.8	1277.8	1.52386	2.36471	3.30669
1276.38	0.56517	1276.38	1276.38	1276.38	1.51623	2.3545	3.29413
1274.95	0.56252	1274.95	1274.95	1274.95	1.51061	2.34681	3.28387
1273.52	0.56203	1273.52	1273.52	1273.52	1.50681	2.34159	3.27593
1272.09	0.56349	1272.09	1272.09	1272.09	1.50485	2.33871	3.27028
1270.66	0.56645	1270.66	1270.66	1270.66	1.50493	2.33802	3.26682
1269.24	0.5704	1269.24	1269.24	1269.24	1.50714	2.33925	3.26535
1267.81	0.57484	1267.81	1267.81	1267.81	1.51127	2.34198	3.26552
1266.38	0.57942	1266.38	1266.38	1266.38	1.51665	2.34563	3.26687
1264.95	0.58391	1264.95	1264.95	1264.95	1.52232	2.34957	3.26887
1263.53	0.58813	1263.53	1263.53	1263.53	1.52742	2.35328	3.27107
1262.1	0.59188	1262.1	1262.1	1262.1	1.53148	2.35638	3.27311
1260.67	0.59493	1260.67	1260.67	1260.67	1.53448	2.35872	3.27479
1259.24	0.59712	1259.24	1259.24	1259.24	1.53673	2.36035	3.27606
1257.82	0.59844	1257.82	1257.82	1257.82	1.53856	2.36141	3.27694
1256.39	0.59915	1256.39	1256.39	1256.39	1.5401	2.36206	3.27751
1254.96	0.59968	1254.96	1254.96	1254.96	1.54127	2.36246	3.27785
1253.53	0.60051	1253.53	1253.53	1253.53	1.542	2.36276	3.27806
1252.1	0.60204	1252.1	1252.1	1252.1	1.54245	2.36322	3.27828
1250.68	0.6045	1250.68	1250.68	1250.68	1.54315	2.36412	3.27868
1249.25	0.60799	1249.25	1249.25	1249.25	1.54485	2.36578	3.27942
1247.82	0.61251	1247.82	1247.82	1247.82	1.54818	2.36843	3.28064
1246.39	0.61816	1246.39	1246.39	1246.39	1.55338	2.37217	3.28237
1244.97	0.62508	1244.97	1244.97	1244.97	1.56022	2.3769	3.28457
1243.54	0.63339	1243.54	1243.54	1243.54	1.56823	2.38245	3.28714
1242.11	0.64313	1242.11	1242.11	1242.11	1.577	2.38865	3.29002
1240.68	0.65408	1240.68	1240.68	1240.68	1.58643	2.3954	3.2932
1239.26	0.66591	1239.26	1239.26	1239.26	1.5967	2.4027	3.29673
1237.83	0.67821	1237.83	1237.83	1237.83	1.60799	2.41053	3.30067
1236.4	0.69065	1236.4	1236.4	1236.4	1.62023	2.41882	3.305
1234.97	0.70307	1234.97	1234.97	1234.97	1.63296	2.42737	3.30962
1233.54	0.71544	1233.54	1233.54	1233.54	1.64545	2.4359	3.31438
1232.12	0.72773	1232.12	1232.12	1232.12	1.65705	2.44417	3.31909
1230.69	0.73979	1230.69	1230.69	1230.69	1.66746	2.452	3.32361
1229.26	0.75137	1229.26	1229.26	1229.26	1.67683	2.45938	3.32788
1227.83	0.76215	1227.83	1227.83	1227.83	1.68557	2.46634	3.3319
1226.41	0.7719	1226.41	1226.41	1226.41	1.69399	2.47294	3.33566
1224.98	0.78051	1224.98	1224.98	1224.98	1.70207	2.47912	3.33915
1223.55	0.788	1223.55	1223.55	1223.55	1.70944	2.48474	3.34228
1222.12	0.79437	1222.12	1222.12	1222.12	1.71564	2.48963	3.34498
1220.69	0.79949	1220.69	1220.69	1220.69	1.72039	2.49362	3.34718
1219.27	0.80302	1219.27	1219.27	1219.27	1.72376	2.49664	3.34884
1217.84	0.80451	1217.84	1217.84	1217.84	1.72596	2.49862	3.34992
1216.41	0.8035	1216.41	1216.41	1216.41	1.72709	2.4994	3.35031
1214.98	0.7997	1214.98	1214.98	1214.98	1.72681	2.4987	3.34983
1213.56	0.79302	1213.56	1213.56	1213.56	1.72441	2.49609	3.34817
1212.13	0.78353	1212.13	1212.13	1212.13	1.71902	2.49115	3.34504
1210.7	0.77135	1210.7	1210.7	1210.7	1.71008	2.48356	3.34014
1209.27	0.75662	1209.27	1209.27	1209.27	1.69753	2.47321	3.33334
1207.85	0.73943	1207.85	1207.85	1207.85	1.68187	2.46025	3.32461
1206.42	0.72002	1206.42	1206.42	1206.42	1.66383	2.44497	3.31407
1204.99	0.69882	1204.99	1204.99	1204.99	1.64405	2.42776	3.30192
1203.56	0.67645	1203.56	1203.56	1203.56	1.62294	2.40904	3.28842
1202.13	0.65367	1202.13	1202.13	1202.13	1.60071	2.38923	3.27385
1200.71	0.63117	1200.71	1200.71	1200.71	1.57765	2.36882	3.25859
1199.28	0.60946	1199.28	1199.28	1199.28	1.55436	2.34836	3.24306
1197.85	0.58878	1197.85	1197.85	1197.85	1.53169	2.32844	3.2277
1196.42	0.5692	1196.42	1196.42	1196.42	1.51052	2.30954	3.21294
1195	0.55075	1195	1195	1195	1.49136	2.29201	3.19908
1193.57	0.53349	1193.57	1193.57	1193.57	1.4742	2.27594	3.18629
1192.14	0.51755	1192.14	1192.14	1192.14	1.4586	2.26124	3.17462
1190.71	0.50299	1190.71	1190.71	1190.71	1.44395	2.24771	3.164
1189.29	0.48979	1189.29	1189.29	1189.29	1.42988	2.23519	3.15437
1187.86	0.47774	1187.86	1187.86	1187.86	1.41638	2.22358	3.14564
1186.43	0.46656	1186.43	1186.43	1186.43	1.40374	2.21284	3.13775
1185	0.456	1185	1185	1185	1.39223	2.20297	3.13061
1183.57	0.44598	1183.57	1183.57	1183.57	1.38182	2.19391	3.12414
1182.15	0.43655	1182.15	1182.15	1182.15	1.37215	2.18554	3.11823
1180.72	0.42784	1180.72	1180.72	1180.72	1.36278	2.17774	3.11277
1179.29	0.41988	1179.29	1179.29	1179.29	1.35341	2.17043	3.10772
1177.86	0.41256	1177.86	1177.86	1177.86	1.34413	2.16358	3.10303
1176.44	0.4056	1176.44	1176.44	1176.44	1.33528	2.15721	3.0987
1175.01	0.39868	1175.01	1175.01	1175.01	1.32722	2.1513	3.0947
1173.58	0.39156	1173.58	1173.58	1173.58	1.31998	2.14574	3.09099
1172.15	0.38418	1172.15	1172.15	1172.15	1.31321	2.14035	3.08746
1170.72	0.37658	1170.72	1170.72	1170.72	1.30631	2.13491	3.08398
1169.3	0.36883	1169.3	1169.3	1169.3	1.29877	2.12925	3.08045
1167.87	0.36094	1167.87	1167.87	1167.87	1.29046	2.12333	3.07683
1166.44	0.3529	1166.44	1166.44	1166.44	1.28168	2.11724	3.07315
1165.01	0.34468	1165.01	1165.01	1165.01	1.27299	2.1112	3.06951
1163.59	0.33645	1163.59	1163.59	1163.59	1.26491	2.10545	3.06603
1162.16	0.32854	1162.16	1162.16	1162.16	1.25773	2.10025	3.06281
1160.73	0.3215	1160.73	1160.73	1160.73	1.25148	2.09586	3.06
1159.3	0.31591	1159.3	1159.3	1159.3	1.2462	2.09252	3.05776
1157.88	0.31224	1157.88	1157.88	1157.88	1.24217	2.09054	3.05629
1156.45	0.31079	1156.45	1156.45	1156.45	1.24001	2.09026	3.0558
1155.02	0.3117	1155.02	1155.02	1155.02	1.24054	2.09205	3.05655
1153.59	0.31505	1153.59	1153.59	1153.59	1.24445	2.0962	3.05873
1152.16	0.32094	1152.16	1152.16	1152.16	1.25199	2.10289	3.06251
1150.74	0.32953	1150.74	1150.74	1150.74	1.26295	2.11213	3.06799
1149.31	0.34094	1149.31	1149.31	1149.31	1.27682	2.12385	3.0752
1147.88	0.3552	1147.88	1147.88	1147.88	1.29313	2.13795	3.0842
1146.45	0.3721	1146.45	1146.45	1146.45	1.3117	2.15438	3.09503
[truncated: 523 more rows]

## Sheet: Fig3b
conc	0.05		0.1		0.2		0.3
0	1.0115	0.0421	0.9293	0.0526	1.0337	0.05351	1.38169	0.0515
1	0.9693	0.0425	0.8785	0.01701	0.9642	0.01553	1.3349	0.07395
2	0.9481	0.0365	0.8562	0.0303	0.9346	0.04562	1.2865	0.05615
3	0.9599	0.0298	0.8944	0.0485	0.9514	0.051	1.3087	0.04652
4	0.9151	0.0356	0.8564	0.02641	0.9181	0.056	1.2802	0.05615
5	0.9309	0.0294	0.8572	0.01521	0.8921	0.01523	1.2472	0.06975
6	0.8377	0.0194	0.7713	0.05412	0.7276	0.04866	0.9279	0.01561
7	0.7426	0.0122	0.7139	0.0645	0.6777	0.05865	0.7146	0.01531
8	0.5994	0.0142	0.5929	0.02179	0.6222	0.048	0.6636	0.0395
9	0.5167	0.0259	0.497	0.058	0.5514	0.05123	0.6154	0.03122

## Sheet: Fig3c
	pristine-G'	pristine-G''		0MG'	0MG''		3MG'	3MG''		0.05MG''	0.05MG'		1MG''	1MG'		2MG''	2MG'		0.1MG''	0.1MG'		0.5MG''	0.5MG'
Angular Frequency	Storage Modulus	Loss Modulus	Angular Frequency	Storage Modulus	Loss Modulus	Angular Frequency	Storage Modulus	Loss Modulus	Angular Frequency	Loss Modulus	Storage Modulus	Angular Frequency	Loss Modulus	Storage Modulus	Angular Frequency	Loss Modulus	Storage Modulus	Angular Frequency	Loss Modulus	Storage Modulus	Angular Frequency	Loss Modulus	Storage Modulus
[1/s]	[Pa]	[Pa]	[1/s]	[Pa]	[Pa]	[1/s]	[Pa]	[Pa]	[1/s]	[Pa]	[Pa]	[1/s]	[Pa]	[Pa]	[1/s]	[Pa]	[Pa]	[1/s]	[Pa]	[Pa]	[1/s]	[Pa]	[Pa]
100	6890	2410	100	9040	1470	100	831000	762000	100	1390	10700	100	9740	31100	100	73500	108000	100	1620	11500	100	3820	14000
69.5	6610	2270	69.5	8520	1370	69.5	720000	634000	69.5	1290	9860	69.5	9040	29900	69.5	63500	99800	69.5	1520	10500	69.5	3570	13900
48.3	6320	2150	48.3	8160	1270	48.3	644000	534000	48.3	1190	9380	48.3	8370	28500	48.3	56100	93600	48.3	1410	9970	48.3	3310	13600
33.6	5980	2010	33.6	7860	1140	33.6	582000	452000	33.6	1060	9020	33.6	7810	27100	33.6	49400	86300	33.6	1260	9590	33.6	3040	13100
23.4	5660	1900	23.4	7610	1030	23.4	536000	387000	23.4	960	8760	23.4	7260	25600	23.4	43300	79300	23.4	1130	9310	23.4	2800	12600
16.2	5340	1820	16.2	7390	934	16.2	492000	331000	16.2	869	8540	16.2	6750	24200	16.2	39000	74700	16.2	1020	9110	16.2	2580	12100
11.3	5020	1760	11.3	7200	852	11.3	456000	287000	11.3	796	8360	11.3	6280	22900	11.3	35100	70100	11.3	922	8940	11.3	2380	11600
7.85	4710	1710	7.85	7030	786	7.85	427000	251000	7.85	730	8190	7.85	5840	21700	7.85	31500	65000	7.85	837	8790	7.85	2200	11200
5.46	4400	1680	5.46	6870	727	5.46	399000	222000	5.46	671	8040	5.46	5420	20500	5.46	28500	60700	5.46	762	8660	5.46	2030	10800
3.79	4080	1660	3.79	6720	674	3.79	380000	197000	3.79	619	7910	3.79	5040	19400	3.79	25600	56300	3.79	692	8550	3.79	1880	10400
2.64	3750	1650	2.64	6590	628	2.64	359000	177000	2.64	573	7780	2.64	4680	18400	2.64	24600	55900	2.64	629	8450	2.64	1740	10100
1.83	3440	1610	1.83	6140	1020	1.83	338000	164000	1.83	247	7690	1.83	4500	17300	1.83	22900	53000	1.83	551	8370	1.83	1480	9820
1.27	3050	1510	1.27	7560	2370	1.27	334000	162000	1.27	632	6500	1.27	5020	16800	1.27	22600	51700	1.27	448	8210	1.27	1010	9020
0.886	2600	1610	0.886	9510	852	0.886	324000	126000	0.886	2040	6440	0.886	3540	17400	0.886	20500	50400	0.886	589	8060	0.886	1970	8280
0.616	2640	1400	0.616	2610	3670	0.616	279000	121000	0.616	1980	7980	0.616	4440	13200	0.616	22900	47000	0.616	222	8310	0.616	1410	9950
0.428	2300	1220	0.428	3750	5900	0.428	266000	132000	0.428	2590	6700	0.428	5390	12800	0.428	21800	39900	0.428	496	8160	0.428	668	9250
0.298	2130	1510	0.298	0	2160	0.298	252000	104000	0.298	4660	10800	0.298	998	11100	0.298	15400	37700	0.298	461	8460	0.298	1670	10900
0.207	1200	1120	0.207	13300	1670	0.207	244000	84800	0.207	2060	3570	0.207	4230	16500	0.207	14900	47600	0.207	406	7460	0.207	1100	5590
0.144	1440	1430	0.144	1460	6660	0.144	224000	84400	0.144	2200	10900	0.144	1450	11600	0.144	4820	34800	0.144	820	8310	0.144	3400	10100
0.1	1630	878	0.1	0	5670	0.1	214000	111000	0.1	3900	8650	0.1	3940	8480	0.1	7360	26400	0.1	193	8370	0.1	1390	10500

## Sheet: Fig3d
0	0.00728		0	1.96026
0.05	5.47		0.01201	2.91281
0.1	10.21		0.01502	3.15044
0.5	41.5		0.01802	3.38788
1	70.8		0.02102	3.62511
2	110.8		0.02402	3.86215
3	131.8		0.02703	4.09898
			0.03003	4.33562
			0.03303	4.57205
			0.03604	4.80828
			0.03904	5.04431
			0.04204	5.28014
			0.04505	5.51577
			0.04805	5.7512
			0.05	5.90412
			0.05105	5.98642
			0.05405	6.22145
			0.05706	6.45627
			0.06006	6.69089
			0.06306	6.92531
			0.06607	7.15953
			0.06907	7.39355
			0.07207	7.62736
			0.07508	7.86098
			0.07808	8.09439
			0.08108	8.3276
			0.08408	8.56061
			0.08709	8.79341
			0.09009	9.02602
			0.09309	9.25842
			0.0961	9.49062
			0.0991	9.72261
			0.1	9.79217
			0.1021	9.95441
			0.10511	10.186
			0.10811	10.4174
			0.11111	10.6486
			0.11411	10.8796
			0.11712	11.1103
			0.12012	11.3409
			0.12312	11.5713
			0.12613	11.8015
			0.12913	12.0314
			0.13213	12.2612
			0.13514	12.4908
			0.13814	12.7201
			0.14114	12.9493
			0.14414	13.1782
			0.14715	13.407
			0.15015	13.6355
			0.15315	13.8639
			0.15616	14.092
			0.15916	14.3199
			0.16216	14.5477
			0.16517	14.7752
			0.16817	15.0025
			0.17117	15.2296
			0.17417	15.4565
			0.17718	15.6832
			0.18018	15.9098
			0.18318	16.1361
			0.18619	16.3621
			0.18919	16.588
			0.19219	16.8137
			0.1952	17.0392
			0.1982	17.2645
			0.2012	17.4896
			0.2042	17.7144
			0.20721	17.9391
			0.21021	18.1636
			0.21321	18.3878
			0.21622	18.6119
			0.21922	18.8357
			0.22222	19.0593
			0.22523	19.2828
			0.22823	19.506
			0.23123	19.729
			0.23423	19.9518
			0.23724	20.1744
			0.24024	20.3969
			0.24324	20.619
			0.24625	20.841
			0.24925	21.0628
			0.25225	21.2844
			0.25526	21.5058
			0.25826	21.7269
			0.26126	21.9479
			0.26426	22.1687
			0.26727	22.3892
			0.27027	22.6096
			0.27327	22.8297
			0.27628	23.0496
			0.27928	23.2694
			0.28228	23.4889
			0.28529	23.7082
			0.28829	23.9273
			0.29129	24.1462
			0.29429	24.3649
			0.2973	24.5834
			0.3003	24.8016
			0.3033	25.0197
			0.30631	25.2376
			0.30931	25.4552
			0.31231	25.6727
			0.31532	25.8899
			0.31832	26.107
			0.32132	26.3238
			0.32432	26.5404
			0.32733	26.7568
			0.33033	26.973
			0.33333	27.189
			0.33634	27.4048
			0.33934	27.6204
			0.34234	27.8357
			0.34535	28.0509
			0.34835	28.2659
			0.35135	28.4806
			0.35435	28.6951
			0.35736	28.9095
			0.36036	29.1236
			0.36336	29.3375
			0.36637	29.5512
			0.36937	29.7647
			0.37237	29.978
			0.37538	30.1911
			0.37838	30.4039
			0.38138	30.6166
			0.38438	30.829
			0.38739	31.0413
			0.39039	31.2533
			0.39339	31.4652
			0.3964	31.6768
			0.3994	31.8882
			0.4024	32.0994
			0.40541	32.3104
			0.40841	32.5211
			0.41141	32.7317
			0.41441	32.9421
			0.41742	33.1522
			0.42042	33.3622
			0.42342	33.5719
			0.42643	33.7814
			0.42943	33.9907
			0.43243	34.1998
			0.43544	34.4087
			0.43844	34.6174
			0.44144	34.8259
			0.44444	35.0341
			0.44745	35.2422
			0.45045	35.45
			0.45345	35.6576
			0.45646	35.8651
			0.45946	36.0723
			0.46246	36.2793
			0.46547	36.486
			0.46847	36.6926
			0.47147	36.899
			0.47447	37.1052
			0.47748	37.3111
			0.48048	37.5168
			0.48348	37.7223
			0.48649	37.9277
			0.48949	38.1328
			0.49249	38.3376
			0.4955	38.5423
			0.4985	38.7468
			0.5	38.8489
			0.5015	38.951
			0.5045	39.1551
			0.50751	39.3589
			0.51051	39.5625
			0.51351	39.7659
			0.51652	39.9691
			0.51952	40.1721
			0.52252	40.3749
			0.52553	40.5774
			0.52853	40.7798
			0.53153	40.9819
			0.53453	41.1839
			0.53754	41.3856
			0.54054	41.5871
			0.54354	41.7884
			0.54655	41.9894
			0.54955	42.1903
			0.55255	42.3909
			0.55556	42.5914
			0.55856	42.7916
			0.56156	42.9916
			0.56456	43.1914
			0.56757	43.391
			0.57057	43.5904
			0.57357	43.7895
			0.57658	43.9885
			0.57958	44.1872
			0.58258	44.3857
			0.58559	44.584
			0.58859	44.7822
			0.59159	44.98
			0.59459	45.1777
			0.5976	45.3751
			0.6006	45.5724
			0.6036	45.7694
			0.60661	45.9662
			0.60961	46.1628
			0.61261	46.3592
			0.61562	46.5554
			0.61862	46.7514
			0.62162	46.9471
			0.62462	47.1426
			0.62763	47.3379
			0.63063	47.5331
			0.63363	47.7279
			0.63664	47.9226
			0.63964	48.1171
			0.64264	48.3113
			0.64565	48.5053
			0.64865	48.6992
			0.65165	48.8928
			0.65465	49.0862
			0.65766	49.2793
			0.66066	49.4723
			0.66366	49.665
			0.66667	49.8576
			0.66967	50.0499
			0.67267	50.242
			0.67568	50.4339
			0.67868	50.6255
			0.68168	50.817
			0.68468	51.0082
			0.68769	51.1992
			0.69069	51.3901
			0.69369	51.5806
			0.6967	51.771
			0.6997	51.9612
			0.7027	52.1511
			0.70571	52.3409
			0.70871	52.5304
			0.71171	52.7197
			0.71471	52.9088
			0.71772	53.0976
			0.72072	53.2863
			0.72372	53.4747
			0.72673	53.663
			0.72973	53.8509
			0.73273	54.0387
			0.73574	54.2263
			0.73874	54.4137
			0.74174	54.6008
			0.74474	54.7877
			0.74775	54.9744
			0.75075	55.1609
			0.75375	55.3472
			0.75676	55.5333
			0.75976	55.7191
			0.76276	55.9047
			0.76577	56.0901
			0.76877	56.2753
			0.77177	56.4603
			0.77477	56.645
			0.77778	56.8296
			0.78078	57.0139
			0.78378	57.198
			0.78679	57.3819
			0.78979	57.5656
			0.79279	57.749
			0.7958	57.9323
			0.7988	58.1153
			0.8018	58.2981
			0.8048	58.4806
			0.80781	58.663
			0.81081	58.8452
			0.81381	59.0271
			0.81682	59.2088
			0.81982	59.3903
			0.82282	59.5716
			0.82583	59.7526
			0.82883	59.9335
			0.83183	60.1141
			0.83483	60.2945
			0.83784	60.4747
			0.84084	60.6547
			0.84384	60.8344
			0.84685	61.014
			0.84985	61.1933
			0.85285	61.3724
			0.85586	61.5512
			0.85886	61.7299
			0.86186	61.9083
			0.86486	62.0866
			0.86787	62.2645
			0.87087	62.4423
			0.87387	62.6199
			0.87688	62.7972
			0.87988	62.9744
			0.88288	63.1513
			0.88589	63.328
			0.88889	63.5044
			0.89189	63.6807
			0.89489	63.8567
			0.8979	64.0325
			0.9009	64.2081
			0.9039	64.3835
			0.90691	64.5587
			0.90991	64.7336
			0.91291	64.9083
			0.91592	65.0828
			0.91892	65.2571
			0.92192	65.4311
			0.92492	65.605
			0.92793	65.7786
			0.93093	65.952
			0.93393	66.1252
			0.93694	66.2981
			0.93994	66.4708
			0.94294	66.6434
			0.94595	66.8157
			0.94895	66.9877
			0.95195	67.1596
			0.95495	67.3312
			0.95796	67.5027
			0.96096	67.6738
			0.96396	67.8448
			0.96697	68.0156
			0.96997	68.1861
			0.97297	68.3564
			0.97598	68.5265
			0.97898	68.6964
			0.98198	68.866
			0.98498	69.0355
			0.98799	69.2047
			0.99099	69.3737
			0.99399	69.5424
			0.997	69.711
			1	69.8793
			1.003	70.0474
			1.00601	70.2153
			1.00901	70.3829
			1.01201	70.5504
			1.01502	70.7176
			1.01802	70.8846
			1.02102	71.0514
			1.02402	71.2179
			1.02703	71.3843
			1.03003	71.5504
			1.03303	71.7163
			1.03604	71.8819
			1.03904	72.0474
			1.04204	72.2126
			1.04505	72.3776
			1.04805	72.5424
			1.05105	72.7069
			1.05405	72.8713
			1.05706	73.0354
			1.06006	73.1993
			1.06306	73.3629
			1.06607	73.5264
			1.06907	73.6896
			1.07207	73.8526
			1.07508	74.0154
			1.07808	74.178
			1.08108	74.3403
			1.08408	74.5024
			1.08709	74.6643
			1.09009	74.826
			1.09309	74.9874
			1.0961	75.1486
			1.0991	75.3096
			1.1021	75.4704
			1.10511	75.631
			1.10811	75.7913
			1.11111	75.9514
			1.11411	76.1113
			1.11712	76.271
			1.12012	76.4304
			1.12312	76.5896
			1.12613	76.7486
			1.12913	76.9074
			1.13213	77.0659
			1.13514	77.2242
			1.13814	77.3823
			1.14114	77.5402
			1.14414	77.6979
			1.14715	77.8553
			1.15015	78.0125
			1.15315	78.1695
			1.15616	78.3262
			1.15916	78.4828
			1.16216	78.6391
			1.16517	78.7952
			1.16817	78.951
			1.17117	79.1067
			1.17417	79.2621
			1.17718	79.4173
			1.18018	79.5722
			1.18318	79.727
			1.18619	79.8815
			1.18919	80.0358
			1.19219	80.1899
			1.1952	80.3437
			1.1982	80.4973
			1.2012	80.6507
			1.2042	80.8039
			1.20721	80.9568
			1.21021	81.1095
			1.21321	81.262
			1.21622	81.4143
			1.21922	81.5664
			1.22222	81.7182
			1.22523	81.8698
			1.22823	82.0212
			1.23123	82.1723
			1.23423	82.3232
			1.23724	82.4739
			1.24024	82.6244
			1.24324	82.7746
			1.24625	82.9247
			1.24925	83.0744
			1.25225	83.224
			1.25526	83.3734
			1.25826	83.5225
			1.26126	83.6714
			1.26426	83.82
			1.26727	83.9685
			1.27027	84.1167
			1.27327	84.2647
			1.27628	84.4125
			1.27928	84.56
			1.28228	84.7073
			1.28529	84.8544
			1.28829	85.0013
			1.29129	85.1479
			1.29429	85.2943
			1.2973	85.4405
			1.3003	85.5865
			1.3033	85.7322
			1.30631	85.8777
			1.30931	86.023
			1.31231	86.1681
			1.31532	86.3129
			1.31832	86.4575
			1.32132	86.6019
			1.32432	86.746
			1.32733	86.8899
			1.33033	87.0336
			1.33333	87.1771
			1.33634	87.3204
			1.33934	87.4634
			1.34234	87.6062
			1.34535	87.7487
			1.34835	87.8911
			1.35135	88.0332
			1.35435	88.1751
			1.35736	88.3167
			1.36036	88.4582
			1.36336	88.5994
			1.36637	88.7403
			1.36937	88.8811
			1.37237	89.0216
			1.37538	89.1619
			1.37838	89.302
			1.38138	89.4418
			1.38438	89.5814
			1.38739	89.7208
			1.39039	89.86
			1.39339	89.9989
			1.3964	90.1376
			1.3994	90.2761
			1.4024	90.4143
			1.40541	90.5523
			1.40841	90.6901
			1.41141	90.8277
			1.41441	90.965
			1.41742	91.1021
			1.42042	91.239
			1.42342	91.3757
			1.42643	91.5121
			1.42943	91.6483
			1.43243	91.7843
			1.43544	91.92
			1.43844	92.0555
			1.44144	92.1908
			1.44444	92.3259
			1.44745	92.4607
			1.45045	92.5953
			1.45345	92.7297
			1.45646	92.8638
			1.45946	92.9977
			1.46246	93.1314
			1.46547	93.2649
			1.46847	93.3981
			1.47147	93.5311
			1.47447	93.6639
			1.47748	93.7964
			1.48048	93.9287
			1.48348	94.0608
			1.48649	94.1927
			1.48949	94.3243
			1.49249	94.4557
			1.4955	94.5869
			1.4985	94.7178
			1.5015	94.8486
			1.5045	94.979
			1.50751	95.1093
			1.51051	95.2393
			1.51351	95.3691
			1.51652	95.4987
			1.51952	95.628
			1.52252	95.7571
			1.52553	95.886
			1.52853	96.0147
			1.53153	96.1431
			1.53453	96.2713
			1.53754	96.3992
			1.54054	96.527
			1.54354	96.6545
			1.54655	96.7818
			1.54955	96.9088
			1.55255	97.0356
			1.55556	97.1622
			1.55856	97.2886
			1.56156	97.4147
			1.56456	97.5406
			1.56757	97.6663
			1.57057	97.7917
			1.57357	97.9169
			1.57658	98.0419
			1.57958	98.1666
			1.58258	98.2911
			1.58559	98.4154
			1.58859	98.5395
			1.59159	98.6633
			1.59459	98.7869
			1.5976	98.9103
			1.6006	99.0334
			1.6036	99.1563
			1.60661	99.279
			1.60961	99.4014
			1.61261	99.5236
			1.61562	99.6456
			1.61862	99.7674
			1.62162	99.8889
			1.62462	100.01
			1.62763	100.131
			1.63063	100.252
			1.63363	100.373
			1.63664	100.493
			1.63964	100.613
			1.64264	100.733
			1.64565	100.853
			1.64865	100.972
			1.65165	101.091
			1.65465	101.21
			1.65766	101.329
			1.66066	101.448
			1.66366	101.566
			1.66667	101.684
			1.66967	101.802
			1.67267	101.919
			1.67568	102.037
			1.67868	102.154
			1.68168	102.271
			1.68468	102.388
			1.68769	102.504
			1.69069	102.62
			1.69369	102.736
			1.6967	102.852
			1.6997	102.967
			1.7027	103.083
			1.70571	103.198
			1.70871	103.313
			1.71171	103.427
			1.71471	103.542
			1.71772	103.656
			1.72072	103.77
			1.72372	103.883
			1.72673	103.997
			1.72973	104.11
			1.73273	104.223
			1.73574	104.336
			1.73874	104.448
			1.74174	104.56
			1.74474	104.672
			1.74775	104.784
			1.75075	104.896
			1.75375	105.007
			1.75676	105.118
			1.75976	105.229
			1.76276	105.34
			1.76577	105.45
			1.76877	105.56
			1.77177	105.67
			1.77477	105.78
			1.77778	105.889
			1.78078	105.999
			1.78378	106.108
			1.78679	106.216
			1.78979	106.325
			1.79279	106.433
			1.7958	106.541
			1.7988	106.649
			1.8018	106.757
			1.8048	106.864
			1.80781	106.971
			1.81081	107.078
			1.81381	107.185
			1.81682	107.292
			1.81982	107.398
			1.82282	107.504
			1.82583	107.609
			1.82883	107.715
			1.83183	107.82
			1.83483	107.925
			1.83784	108.03
			1.84084	108.135
			1.84384	108.239
			1.84685	108.343
			1.84985	108.447
			1.85285	108.551
			1.85586	108.654
			1.85886	108.757
			1.86186	108.86
			1.86486	108.963
			1.86787	109.066
			1.87087	109.168
			1.87387	109.27
			1.87688	109.372
			1.87988	109.473
			1.88288	109.575
			1.88589	109.676
			1.88889	109.777
			1.89189	109.877
			1.89489	109.978
			1.8979	110.078
			1.9009	110.178
			1.9039	110.277
			1.90691	110.377
			1.90991	110.476
			1.91291	110.575
			1.91592	110.674
			1.91892	110.772
			1.92192	110.871
			1.92492	110.969
			1.92793	111.066
			1.93093	111.164
			1.93393	111.261
			1.93694	111.358
			1.93994	111.455
			1.94294	111.552
			1.94595	111.648
			1.94895	111.745
			1.95195	111.84
			1.95495	111.936
			1.95796	112.032
			1.96096	112.127
			1.96396	112.222
			1.96697	112.317
			1.96997	112.411
			1.97297	112.506
			1.97598	112.6
			1.97898	112.693
			1.98198	112.787
			1.98498	112.88
			1.98799	112.974
			1.99099	113.066
			1.99399	113.159
			1.997	113.251
			2	113.344
			2.003	113.436
			2.00601	113.527
			2.00901	113.619
			2.01201	113.71
			2.01502	113.801
			2.01802	113.892
			2.02102	113.982
			2.02402	114.073
			2.02703	114.163
			2.03003	114.253
			2.03303	114.342
			2.03604	114.432
			2.03904	114.521
			2.04204	114.61
			2.04505	114.698
			2.04805	114.787
			2.05105	114.875
			2.05405	114.963
			2.05706	115.051
			2.06006	115.138
			2.06306	115.225
			2.06607	115.312
			2.06907	115.399
			2.07207	115.486
			2.07508	115.572
			2.07808	115.658
			2.08108	115.744
			2.08408	115.829
			2.08709	115.915
			2.09009	116
			2.09309	116.085
			2.0961	116.17
			2.0991	116.254
			2.1021	116.338
			2.10511	116.422
			2.10811	116.506
			2.11111	116.589
			2.11411	116.673
			2.11712	116.756
			2.12012	116.838
			2.12312	116.921
			2.12613	117.003
			2.12913	117.085
			2.13213	117.167
			2.13514	117.249
			2.13814	117.33
			2.14114	117.411
			2.14414	117.492
			2.14715	117.573
			2.15015	117.653
			2.15315	117.733
			2.15616	117.813
			2.15916	117.893
			2.16216	117.972
			2.16517	118.052
			2.16817	118.131
			2.17117	118.209
			2.17417	118.288
			2.17718	118.366
			2.18018	118.444
			2.18318	118.522
			2.18619	118.6
			2.18919	118.677
			2.19219	118.754
			2.1952	118.831
			2.1982	118.907
			2.2012	118.984
			2.2042	119.06
			2.20721	119.136
			2.21021	119.212
			2.21321	119.287
			2.21622	119.362
			2.21922	119.437
			2.22222	119.512
			2.22523	119.586
			2.22823	119.661
			2.23123	119.735
			2.23423	119.809
			2.23724	119.882
			2.24024	119.955
			2.24324	120.028
			2.24625	120.101
			2.24925	120.174
			2.25225	120.246
			2.25526	120.318
			2.25826	120.39
			2.26126	120.462
			2.26426	120.533
			2.26727	120.605
			2.27027	120.675
			2.27327	120.746
			2.27628	120.817
			2.27928	120.887
			2.28228	120.957
			2.28529	121.027
			2.28829	121.096
			2.29129	121.165
			2.29429	121.234
			2.2973	121.303
			2.3003	121.372
			2.3033	121.44
			2.30631	121.508
			2.30931	121.576
			2.31231	121.644
			2.31532	121.711
			2.31832	121.778
			2.32132	121.845
			2.32432	121.912
			2.32733	121.978
			2.33033	122.044
			2.33333	122.11
			2.33634	122.176
			2.33934	122.242
			2.34234	122.307
			2.34535	122.372
			2.34835	122.437
			2.35135	122.501
			2.35435	122.565
			2.35736	122.63
			2.36036	122.693
			2.36336	122.757
			2.36637	122.82
			2.36937	122.883
			2.37237	122.946
			2.37538	123.009
			2.37838	123.071
			2.38138	123.133
			2.38438	123.195
			2.38739	123.257
			2.39039	123.318
			2.39339	123.38
			2.3964	123.441
			2.3994	123.501
			2.4024	123.562
			2.40541	123.622
			2.40841	123.682
			2.41141	123.742
			2.41441	123.801
			2.41742	123.861
			2.42042	123.92
			2.42342	123.978
			2.42643	124.037
			2.42943	124.095
			2.43243	124.154
			2.43544	124.211
			2.43844	124.269
			2.44144	124.326
			2.44444	124.384
			2.44745	124.44
			2.45045	124.497
			2.45345	124.554
			2.45646	124.61
			2.45946	124.666
			2.46246	124.721
			2.46547	124.777
			2.46847	124.832
			2.47147	124.887
			2.47447	124.942
			2.47748	124.996
			2.48048	125.051
			2.48348	125.105
			2.48649	125.159
			2.48949	125.212
			2.49249	125.266
			2.4955	125.319
			2.4985	125.371
			2.5015	125.424
			2.5045	125.476
			2.50751	125.529
			2.51051	125.58
			2.51351	125.632
			2.51652	125.684
			2.51952	125.735
			2.52252	125.786
			2.52553	125.836
			2.52853	125.887
			2.53153	125.937
			2.53453	125.987
			2.53754	126.037
			2.54054	126.086
			2.54354	126.136
			2.54655	126.185
			2.54955	126.233
			2.55255	126.282
			2.55556	126.33
			2.55856	126.378
			2.56156	126.426
			2.56456	126.474
			2.56757	126.521
			2.57057	126.568
			2.57357	126.615
			2.57658	126.662
			2.57958	126.708
			2.58258	126.754
			2.58559	126.8
			2.58859	126.846
			2.59159	126.892
			2.59459	126.937
			2.5976	126.982
			2.6006	127.026
			2.6036	127.071
			2.60661	127.115
			2.60961	127.159
			2.61261	127.203
			2.61562	127.246
			2.61862	127.29
			2.62162	127.333
			2.62462	127.376
			2.62763	127.418
			2.63063	127.461
			2.63363	127.503
			2.63664	127.545
			2.63964	127.586
			2.64264	127.628
			2.64565	127.669
			2.64865	127.71
			2.65165	127.75
			2.65465	127.791
			2.65766	127.831
			2.66066	127.871
			2.66366	127.91
			2.66667	127.95
			2.66967	127.989
			2.67267	128.028
			2.67568	128.067
			2.67868	128.105
			2.68168	128.144
			2.68468	128.182
			2.68769	128.22
			2.69069	128.257
			2.69369	128.294
			2.6967	128.331
			2.6997	128.368
			2.7027	128.405
			2.70571	128.441
			2.70871	128.477
			2.71171	128.513
			2.71471	128.549
			2.71772	128.584
			2.72072	128.619
			2.72372	128.654
			2.72673	128.689
			2.72973	128.723
			2.73273	128.758
			2.73574	128.792
			2.73874	128.825
			2.74174	128.859
			2.74474	128.892
			2.74775	128.925
			2.75075	128.958
			2.75375	128.99
			2.75676	129.022
			2.75976	129.055
			2.76276	129.086
			2.76577	129.118
			2.76877	129.149
			2.77177	129.18
			2.77477	129.211
			2.77778	129.242
			2.78078	129.272
			2.78378	129.302
			2.78679	129.332
			2.78979	129.362
			2.79279	129.391
			2.7958	129.42
			2.7988	129.449
			2.8018	129.478
			2.8048	129.506
			2.80781	129.534
			2.81081	129.562
			2.81381	129.59
			2.81682	129.618
			2.81982	129.645
			2.82282	129.672
			2.82583	129.699
			2.82883	129.725
			2.83183	129.751
			2.83483	129.777
			2.83784	129.803
			2.84084	129.829
			2.84384	129.854
			2.84685	129.879
			2.84985	129.904
			2.85285	129.929
			2.85586	129.953
			2.85886	129.977
			2.86186	130.001
			2.86486	130.025
			2.86787	130.048
			2.87087	130.071
			2.87387	130.094
			2.87688	130.117
			2.87988	130.139
			2.88288	130.161
			2.88589	130.183
			2.88889	130.205
			2.89189	130.226
			2.89489	130.248
			2.8979	130.269
			2.9009	130.289
			2.9039	130.31
			2.90691	130.33
			2.90991	130.35
			2.91291	130.37
			2.91592	130.39
			2.91892	130.409
			2.92192	130.428
			2.92492	130.447
			2.92793	130.465
			2.93093	130.484
			2.93393	130.502
			2.93694	130.52
			2.93994	130.537
			2.94294	130.555
			2.94595	130.572
			2.94895	130.589
			2.95195	130.605
			2.95495	130.622
			2.95796	130.638
			2.96096	130.654
			2.96396	130.67
			2.96697	130.685
			2.96997	130.7
			2.97297	130.715
			2.97598	130.73
			2.97898	130.745
			2.98198	130.759
			2.98498	130.773
			2.98799	130.787
			2.99099	130.8
			2.99399	130.814
			2.997	130.827
			3	130.839

## Sheet: Fig4b
19	0.00929
25	0
31	0
37	0.28261
43	0.38235
55	0.40625
67	0.41935

[truncated: 2 more sheets: Fig4c, Fig4d]
